# Supplementary material for: A Biomedically Enriched Collection of 7000 Human ORF Clones
Source: PLoS One. 2008 Jan 30;3(1):e1528. doi: 10.1371/journal.pone.0001528 (PMC2211400; doi:10.1371/journal.pone.0001528)
Supplement: Table S1 — Target Gene List for HFLEX7000. MGC clones targeted for conversion into ORF clones are listed with Gene Symbol, Entrez GeneID, gene name, GenBank Acc. No., and CDS Length (0.62 MB XLS) [file pone.0001528.s001.xls]

## Sheet: HFLEX - Targeted Genes
Gene Symbol	Entrez GeneID	Name	GenBank Accession	GI	CDS Length
76P	27229	gamma tubulin ring complex protein (76p gene)	BC012801	15215402	2001
A4GALT	53947	alpha 1,4-galactosyltransferase	BC017068	16877646	1062
AAAS	8086	achalasia, adrenocortical insufficiency, alacrimia (Allgrove, triple-A)	BC000659	12653746	1641
AARS	16	alanyl-tRNA synthetase	BC011451	15079237	2907
AASDHPPT	60496	aminoadipate-semialdehyde dehydrogenase-phosphopantetheinyl transferase	BC015470	15930050	930
AATF	26574	apoptosis antagonizing transcription factor	BC000591	12653626	1683
ABAT	18	4-aminobutyrate aminotransferase	BC015628	15990486	1503
ABCB6	10058	ATP-binding cassette, sub-family B (MDR/TAP), member 6	BC000559	12653570	2529
ABCB7	22	ATP-binding cassette, sub-family B (MDR/TAP), member 7	BC006323	13623446	2262
ABCD1	215	ATP-binding cassette, sub-family D (ALD), member 1	BC015541	15930220	2238
ABCD4	5826	ATP-binding cassette, sub-family D (ALD), member 4	BC012815	15215441	1821
ABCE1	6059	ATP-binding cassette, sub-family E (OABP), member 1	BC016283	16740841	1800
ABCF1	23	ATP-binding cassette, sub-family F (GCN20), member 1	BC034488	21759806	2538
ABCF2	10061	ATP-binding cassette, sub-family F (GCN20), member 2	BC001661	12804500	1872
ABCG1	9619	ATP-binding cassette, sub-family G (WHITE), member 1	BC029158	20809789	1989
ABCG2	9429	ATP-binding cassette, sub-family G (WHITE), member 2	BC021281	33879135	1968
ABHD2	11057	abhydrolase domain containing 2	BC019248	19483835	1278
ABI-2	10152	abl interactor 2	BC001439	12655166	1428
ACAA1	30	acetyl-Coenzyme A acyltransferase 1 (peroxisomal 3-oxoacyl-Coenzyme A thiolase)	BC011977	15080464	1275
ACAA2	10449		BC001918.1	12804930	1194
ACAD8	27034	acyl-Coenzyme A dehydrogenase family, member 8	BC001964	12805020	1248
ACADL	33	acyl-Coenzyme A dehydrogenase, long chain	BC039063	24660233	1293
ACADM	34	acyl-Coenzyme A dehydrogenase, C-4 to C-12 straight chain	BC005377	13529232	1266
ACADS	35	acyl-Coenzyme A dehydrogenase, C-2 to C-3 short chain	BC025963	19684165	1239
ACO2	50	aconitase 2, mitochondrial	BC014092	15559447	2343
ACOX1	51	acyl-Coenzyme A oxidase 1, palmitoyl	BC008767	14250615	1983
ACP2	53	acid phosphatase 2, lysosomal	BC003160	13111974	1272
ACPP	55	acid phosphatase, prostate	BC008493	14250149	1161
ACRBP	84519	acrosin binding protein	BC033010	21542511	1632
ACT	9457	four and a half LIM domains 5	BC021723	18204343	855
ACTA1	58	actin, alpha 1, skeletal muscle	BC012597	15214922	1134
ACTA2	59	actin, alpha 2, smooth muscle, aorta	BC017554	17028466	1134
ACTB	60	actin, beta	BC001301	12654910	1128
ACTC	70	actin, alpha, cardiac muscle	BC009978	14602985	1134
ACTG1	71	actin, gamma 1	BC000292	12653054	1128
ACTG2	72	actin, gamma 2, smooth muscle, enteric	BC012617	15214974	1131
ACTN1	87	actinin, alpha 1	BC003576	13097755	2679
ACTN4	81		BC005033.1	13477150	2736
ACTR10	55860	actin-related protein 10 homolog (S. cerevisiae)	BC011997	15080515	1254
ACTR1A	10121	ARP1 actin-related protein 1 homolog A, centractin alpha (yeast)	BC000693	12653808	1131
ACTR1B	10120		BC004374.2	19718809	1131
ACY1	95	aminoacylase 1	BC000545	12653544	1227
AD023	57409	AD023 protein	BC033759	21707111	771
ADA	100	adenosine deaminase	BC007678	14043372	1092
ADAM15	8751	a disintegrin and metalloproteinase domain 15 (metargidin)	BC014566	15778975	2445
ADAM2	2515	a disintegrin and metalloproteinase domain 2 (fertilin beta)	BC034957	23958233	2151
ADAM20	8748	a disintegrin and metalloproteinase domain 20	BC025378	19263958	2181
ADAM30	11085	a disintegrin and metalloproteinase domain 30	BC028372	20306261	2373
ADAM32	203102	a disintegrin and metalloproteinase domain 32	BC030698	21265151	2364
ADAMTS1	9510	a disintegrin-like and metalloprotease (reprolysin type) with thrombospondin type 1 motif, 1	BC036515	22328075	2904
ADAR	103	adenosine deaminase, RNA-specific	BC038227	23398521	3681
ADAT1	23536	adenosine deaminase, tRNA-specific 1	BC002758	12803834	1509
ADFP	123	adipose differentiation-related protein	BC005127	13477306	1314
ADK	132	adenosine kinase	BC003568	13097731	1038
ADMR	11318	adrenomedullin receptor	BC034761	21961319	1215
ADORA1	134	adenosine A1 receptor	BC026340	20070960	981
ADORA2B	136	adenosine A2b receptor	BC025722	19343938	999
ADORA3	140	adenosine A3 receptor	BC029831	20988264	957
ADPRT	142	poly (ADP-ribose) polymerase family, member 1	BC037545	22902365	3045
ADRBK1	156	adrenergic, beta, receptor kinase 1	BC037963	23272738	2070
ADRM1	11047	adhesion regulating molecule 1	BC017245	16878070	1224
ADSL	158	adenylosuccinate lyase	BC000253	12652984	1455
AEBP1	165	AE binding protein 1	BC038588	24047246	3477
AF1Q	10962	ALL1-fused gene from chromosome 1q	BC009624	16307091	273
AFP	174	alpha-fetoprotein	BC027881	20379786	1830
AGA	175	aspartylglucosaminidase	BC012392	15214538	1041
AGER	177	advanced glycosylation end product-specific receptor	BC020669	18088362	1215
AGMAT	79814		BC005090.1	13477244	1059
AGPAT2	10555	1-acylglycerol-3-phosphate O-acyltransferase 2 (lysophosphatidic acid acyltransferase, beta)	BC000026	12652568	837
AGR2	10551	anterior gradient 2 homolog (Xenopus laevis)	BC015503	15930124	528
AGT	183	angiotensinogen (serine (or cysteine) proteinase inhibitor, clade A (alpha-1 antiproteinase, antitrypsin), member 8)	BC011519	15079347	1458
AGTR1	185	angiotensin II receptor, type 1	BC022447	18490885	1080
AGTRAP	57085	angiotensin II receptor-associated protein	BC017328	16878259	459
AGTRL1	187	angiotensin II receptor-like 1	BC032688	21619182	1143
AHCY	191	S-adenosylhomocysteine hydrolase	BC011606	15079561	1299
AHCYL1	10768	S-adenosylhomocysteine hydrolase-like 1	BC010681	14715037	1503
AICDA	57379	activation-induced cytidine deaminase	BC006296	13623400	597
AIG-1	51390	androgen-induced 1	BC025278	19263924	717
AIPL1	23746	aryl hydrocarbon receptor interacting protein-like 1	BC012055	15082298	1155
AK1	203	adenylate kinase 1	BC001116	12654562	585
AK3	205	adenylate kinase 3	BC016180	16740594	672
AK3L1	50808	adenylate kinase 3 like 1	BC013771	15489347	684
AK5	26289	adenylate kinase 5	BC036666	22477786	1689
AK7	122481	adenylate kinase 7	BC035256	23272320	1971
AKAP1	8165	A kinase (PRKA) anchor protein 1	BC000729	12653874	2712
AKAP10	11216	A kinase (PRKA) anchor protein 10	BC017055	16877611	1989
AKR1A1	10327	aldo-keto reductase family 1, member A1 (aldehyde reductase)	BC000670	12653768	978
AKR1B1	231	aldo-keto reductase family 1, member B1 (aldose reductase)	BC010391	14714516	951
AKR1B10	57016	aldo-keto reductase family 1, member B10 (aldose reductase)	BC008837	14250735	951
AKR1C1	1645	aldo-keto reductase family 1, member C1 (dihydrodiol dehydrogenase 1; 20-alpha (3-alpha)-hydroxysteroid dehydrogenase)	BC020216	18044220	972
AKR1C2	1646	aldo-keto reductase family 1, member C2 (dihydrodiol dehydrogenase 2; bile acid binding protein; 3-alpha hydroxysteroid dehydrogenase, type III)	BC007024	13937843	972
AKR1C3	8644	aldo-keto reductase family 1, member C3 (3-alpha hydroxysteroid dehydrogenase, type II)	BC001479	16306614	972
AKR1C4	1109	aldo-keto reductase family 1, member C4 (chlordecone reductase; 3-alpha hydroxysteroid dehydrogenase, type I; dihydrodiol dehydrogenase 4)	BC020744	18088445	972
AKR7A2	8574	aldo-keto reductase family 7, member A2 (aflatoxin aldehyde reductase)	BC010852	14790004	993
AKR7A3	22977	aldo-keto reductase family 7, member A3 (aflatoxin aldehyde reductase)	BC025709	19343680	996
ALAD	210	aminolevulinate, delta-, dehydratase	BC000977	21618697	1020
ALB	213	albumin	BC034023	21706455	1830
ALDH1A1	216	aldehyde dehydrogenase 1 family, member A1	BC001505	16306660	1506
ALDH1A2	8854	aldehyde dehydrogenase 1 family, member A2	BC030589	21040517	1443
ALDH1B1	219	aldehyde dehydrogenase 1 family, member B1	BC001619	12804426	1554
ALDH3A1	218	aldehyde dehydrogenase 3 family, memberA1	BC004370	13325113	1362
ALDH3A2	224	aldehyde dehydrogenase 3 family, member A2	BC002430	12803234	1527
ALDH3B1	221	aldehyde dehydrogenase 3 family, member B1	BC013584	15488910	1407
ALDH3B2	222	aldehyde dehydrogenase 3 family, member B2	BC007685	14043387	1158
ALDH4A1	8659	aldehyde dehydrogenase 4 family, member A1	BC007581	14043186	1692
ALDH5A1	7915	aldehyde dehydrogenase 5 family, member A1 (succinate-semialdehyde dehydrogenase)	BC034321	21708022	1608
ALDH6A1	4329	aldehyde dehydrogenase 6 family, member A1	BC004909	13436199	1608
ALDOA	226	aldolase A, fructose-bisphosphate	BC010660	14715000	1095
ALEX1	51309	armadillo repeat containing, X-linked 1	BC002691	12803710	1362
ALEX2	9823	armadillo repeat containing, X-linked 2	BC015926	16198490	1899
ALEX3	51566	armadillo repeat containing, X-linked 3	BC005194	13528785	1140
ALF	11036	TFIIA-alpha/beta-like factor	BC025991	19684123	1437
ALG12	79087	asparagine-linked glycosylation 12 homolog (yeast, alpha-1,6-mannosyltransferase)	BC001729	12804614	1467
ALK7	130399	activin A receptor, type IC	BC022530	18490924	1482
ALKBH	8846	alkB, alkylation repair homolog (E. coli)	BC025787	19343599	1170
ALOX15B	247	arachidonate 15-lipoxygenase, second type	BC035217	23270880	2031
ALOX5AP	241	arachidonate 5-lipoxygenase-activating protein	BC018538	17391274	486
ALS2CR2	55437	amyotrophic lateral sclerosis 2 (juvenile) chromosome region, candidate 2	BC008302	14249853	1257
ALS2CR8	79800	amyotrophic lateral sclerosis 2 (juvenile) chromosome region, candidate 8	BC033777	34192431	2178
ALTE	9189	zinc finger, BED domain containing 1	BC015030	15929150	2085
AMD1	262	adenosylmethionine decarboxylase 1	BC000171	13111807	1005
AMID	84883	apoptosis-inducing factor (AIF)-like mitochondrion-associated inducer of death	BC006121	13543963	1122
AMSH	10617	STAM binding protein	BC007682	14043381	1275
AMY2A	279	amylase, alpha 2A; pancreatic	BC007060	13937900	1536
ANAPC2	29882	anaphase promoting complex subunit 2	BC032503	21595797	2469
ANKH	56172	ankylosis, progressive homolog (mouse)	BC014526	15778895	1479
ANKRA2	57763	ankyrin repeat, family A (RFXANK-like), 2	BC012917	15991861	942
ANKRD5	63926	ankyrin repeat domain 5	BC022878	18606110	2331
ANKRD9	122416	ankyrin repeat domain 9	BC015422	15929984	954
ANKT	51203	nucleolar and spindle associated protein 1	BC010838	14789963	678
ANP32A	8125		BC007200.1	13938167	750
ANXA1	301	annexin A1	BC001275	12654862	1041
ANXA10	11199	annexin A10	BC007320	13938373	975
ANXA11	311	annexin A11	BC007564	14043152	1518
ANXA2	302	annexin A2	BC009564	16306977	1020
ANXA4	307	annexin A4	BC000182	12652858	966
ANXA5	308	annexin A5	BC001429	12655148	963
ANXA6	309	annexin A6	BC017046	16877588	2022
ANXA8	244		BC004376.1	13325125	984
ANXA9	8416	annexin A9	BC005830	13543331	1038
AOAH	313	acyloxyacyl hydrolase (neutrophil)	BC025698	19343612	1728
AP1S2	8905	adaptor-related protein complex 1, sigma 2 subunit	BC001117	12654564	474
AP2A1	160	adaptor-related protein complex 2, alpha 1 subunit	BC014214	15559716	2949
AP2A2	161		BC006155.1	13544040	2820
AP2B1	163	adaptor-related protein complex 2, beta 1 subunit	BC006201	13623210	2856
AP2M1	1173	adaptor-related protein complex 2, mu 1 subunit	BC004996	13436451	1308
AP3B1	8546	adaptor-related protein complex 3, beta 1 subunit	BC038444	23512244	3285
AP3M1	26985	adaptor-related protein complex 3, mu 1 subunit	BC026232	20072198	1257
AP3S1	1176	adaptor-related protein complex 3, sigma 1 subunit	BC000804	12654008	582
AP3S2	10239	adaptor-related protein complex 3, sigma 2 subunit	BC002785	12803880	582
AP4S1	11154	adaptor-related protein complex 4, sigma 1 subunit	BC001259	12654832	480
APBB1	322	amyloid beta (A4) precursor protein-binding, family B, member 1 (Fe65)	BC010854	14790012	2127
APBB2	323	amyloid beta (A4) precursor protein-binding, family B, member 2 (Fe65-like)	BC027946	24081023	990
APEH	327	N-acylaminoacyl-peptide hydrolase	BC000362	12653188	2199
APELIN	8862	apelin, AGTRL1 ligand	BC021104	18088893	369
APEX1	328	APEX nuclease (multifunctional DNA repair enzyme) 1	BC008145	14198173	957
APEX2	27301	APEX nuclease (apurinic/apyrimidinic endonuclease) 2	BC002959	12804202	1557
APG10L	83734	APG10 autophagy 10-like (S. cerevisiae)	BC029268	20810170	663
APG3	64422		BC024221.2	33872933	945
Apg4B	23192	APG4 autophagy 4 homolog B (S. cerevisiae)	BC000719	12653856	1182
API5	8539	apoptosis inhibitor 5	BC017709	17389324	1515
APLP1	333	amyloid beta (A4) precursor-like protein 1	BC012889	15277601	1953
APLP2	334	amyloid beta (A4) precursor-like protein 2	BC000373	12653210	2256
APOA1	335	apolipoprotein A-I	BC005380	13529241	804
APOA2	336	apolipoprotein A-II	BC005282	13528980	303
APOC3	345	apolipoprotein C-III	BC027977	20379764	300
APOD	347	apolipoprotein D	BC007402	13938508	570
APOE	348	apolipoprotein E	BC003557	13097698	954
APOH	350	apolipoprotein H (beta-2-glycoprotein I)	BC026283	20072225	1038
APOL2	23780		BC004395.1	13325155	1014
APPBP1	8883	amyloid beta precursor protein binding protein 1, 59kDa	BC000480	12653418	1605
AQP1	358	aquaporin 1 (channel-forming integral protein, 28kDa)	BC022486	18490902	810
AQP5	362	aquaporin 5	BC032946	21432082	798
ARAF1	369	v-raf murine sarcoma 3611 viral oncogene homolog	BC002466	12803300	1821
ARC	23237	activity-regulated cytoskeleton-associated protein	BC012321	15147373	1191
AREG	374	amphiregulin (schwannoma-derived growth factor)	BC009799	14602574	759
ARF4	378	ADP-ribosylation factor 4	BC003364	13097191	543
ARFD1	373	tripartite motif-containing 23	BC022510	18490295	1725
ARFGAP3	26286	ADP-ribosylation factor GTPase activating protein 3	BC005122	13477296	1551
ARG1	383	arginase, liver	BC020653	18089066	969
ARHC	389	ras homolog gene family, member C	BC007245	13938242	582
ARHD	29984	ras homolog gene family, member D	BC001338	12654980	633
ARHE	390	Rho family GTPase 3	BC012513	15214762	735
ARHGAP1	392	Rho GTPase activating protein 1	BC018118	17390259	1320
ARHGAP9	64333	Rho GTPase activating protein 9	BC006107	13543929	2253
ARHGDIA	396	Rho GDP dissociation inhibitor (GDI) alpha	BC016031	16359131	615
ARHGDIB	397	Rho GDP dissociation inhibitor (GDI) beta	BC009200	14327951	606
ARHGEF1	9138	Rho guanine nucleotide exchange factor (GEF) 1	BC034013	21707582	2739
ARHGEF16	27237	Rho guanine exchange factor (GEF) 16	BC002681	12803690	1266
ARHGEF2	9181	rho/rac guanine nucleotide exchange factor (GEF) 2	BC020567	18089026	2880
ARHGEF5	7984	Rho guanine nucleotide exchange factor (GEF) 5	BC014555	15778952	1560
ARHH	399	ras homolog gene family, member H	BC014261	17315201	576
ARHI	9077	DIRAS family, GTP-binding RAS-like 3	BC005362	13529193	690
ARIH2	10425	ariadne homolog 2 (Drosophila)	BC000422	12653306	1482
ARL1	400	ADP-ribosylation factor-like 1	BC007000	13937800	546
ARL3	403	ADP-ribosylation factor-like 3	BC009841	14602643	549
ARL5	26225	ADP-ribosylation factor-like 5	BC001254	12654822	540
ARL8	221079	ADP-ribosylation factor-like 8	BC024163	18848192	540
ARNT2	9915	aryl-hydrocarbon receptor nuclear translocator 2	BC036099	23271920	2151
ARP3BETA	57180	actin-related protein 3-beta	BC008682	14250482	1257
ARPC1B	10095	actin related protein 2/3 complex, subunit 1B, 41kDa	BC002562	12803474	1119
ARPM1	84517	actin related protein M1	BC007289	13938318	1119
ARPM2	140625	actin-related protein M2	BC029499	20809587	1131
ARR3	407	arrestin 3, retinal (X-arrestin)	BC012096	15082366	1080
ARRB2	409	arrestin, beta 2	BC007427	13938554	1230
ARSA	410	arylsulfatase A	BC014210	15559707	1530
ART3	419	ADP-ribosyltransferase 3	BC017913	17389806	1137
ASAH1	427	N-acylsphingosine amidohydrolase (acid ceramidase) 1	BC016481	16741291	1188
ASB2	51676	ankyrin repeat and SOCS box-containing 2	BC032354	21595248	1764
ASB3	51130	ankyrin repeat and SOCS box-containing 3	BC006488	13623716	1557
ASCL1	429	achaete-scute complex-like 1 (Drosophila)	BC002341	12803078	711
ASGR1	432	asialoglycoprotein receptor 1	BC032130	33879712	876
ASGR2	433	asialoglycoprotein receptor 2	BC017251	16878087	864
ASIC4	55515	amiloride-sensitive cation channel 4, pituitary	BC010439	14714603	1944
ASM3A	10924	sphingomyelin phosphodiesterase, acid-like 3A	BC018999	17512052	1362
ASNS	440	asparagine synthetase	BC008723	14250541	1686
ASPA	443	aspartoacylase (aminoacylase 2, Canavan disease)	BC029128	20810517	942
ASPSCR1	79058	alveolar soft part sarcoma chromosome region, candidate 1	BC018722	17511731	1662
ATE1	11101	arginyltransferase 1	BC022026	18314431	1449
ATF3	467	activating transcription factor 3	BC006322	13623444	546
ATF4	468	activating transcription factor 4 (tax-responsive enhancer element B67)	BC008090	14198041	1056
ATF5	22809	activating transcription factor 5	BC005174	13477389	849
ATIC	471	5-aminoimidazole-4-carboxamide ribonucleotide formyltransferase/IMP cyclohydrolase	BC008879	14250817	1779
ATOH7	220202	atonal homolog 7 (Drosophila)	BC032621	21618609	459
ATP1A1	476	ATPase, Na+/K+ transporting, alpha 1 polypeptide	BC003077	13111777	3072
ATP2A2	488	ATPase, Ca++ transporting, cardiac muscle, slow twitch 2	BC035588	23272582	3129
ATP2A3	489	ATPase, Ca++ transporting, ubiquitous	BC035729	23273018	3000
ATP2C1	27032	ATPase, Ca++ transporting, type 2C, member 1	BC028139	20380102	2667
ATP4B	496	ATPase, H+/K+ exchanging, beta polypeptide	BC029059	20809654	876
ATP5A1	498	ATP synthase, H+ transporting, mitochondrial F1 complex, alpha subunit, isoform 1, cardiac muscle	BC011384	15030239	1662
ATP5B	506	ATP synthase, H+ transporting, mitochondrial F1 complex, beta polypeptide	BC016512	16741372	1590
ATP5G2	517	ATP synthase, H+ transporting, mitochondrial F0 complex, subunit c (subunit 9), isoform 2	BC020826	34783321	426
ATP6IP1	537	ATPase, H+ transporting, lysosomal accessory protein 1	BC000724	12653864	1413
ATP6V0D1	9114	ATPase, H+ transporting, lysosomal 38kDa, V0 subunit d isoform 1	BC008861	14250783	1056
ATP6V1B2	526	ATPase, H+ transporting, lysosomal 56/58kDa, V1 subunit B, isoform 2	BC003100	13111864	1536
ATP6V1C2	245973	ATPase, H+ transporting, lysosomal 42kDa, V1 subunit C isoform 2	BC012142	15082450	1146
AUH	549	AU RNA binding protein/enoyl-Coenzyme A hydratase	BC020722	18089119	933
AUTL1	84938	APG4 autophagy 4 homolog C (S. cerevisiae)	BC033024	21542521	1377
AXL	558	AXL receptor tyrosine kinase	BC032229	21619003	2685
B2M	567	beta-2-microglobulin	BC032589	21619743	360
B3GALT4	8705	UDP-Gal:betaGlcNAc beta 1,3-galactosyltransferase, polypeptide 4	BC032574	21595681	1137
B3GAT1	27087	beta-1,3-glucuronyltransferase 1 (glucuronosyltransferase P)	BC010466	14714652	1005
B3GNT1	10678	UDP-GlcNAc:betaGal beta-1,3-N-acetylglucosaminyltransferase 1	BC030579	21040508	1194
B3GNT4	79369	UDP-GlcNAc:betaGal beta-1,3-N-acetylglucosaminyltransferase 4	BC031399	21619493	1137
B3GNT5	84002	UDP-GlcNAc:betaGal beta-1,3-N-acetylglucosaminyltransferase 5	BC028058	24081080	1137
B3GNT6	11041	UDP-GlcNAc:betaGal beta-1,3-N-acetylglucosaminyltransferase 6	BC021965	18314365	1248
B4GALT3	8703	UDP-Gal:betaGlcNAc beta 1,4- galactosyltransferase, polypeptide 3	BC000276	12653026	1182
B4GALT7	11285	xylosylprotein beta 1,4-galactosyltransferase, polypeptide 7 (galactosyltransferase I)	BC007317	13938367	984
b5+b5R	51167	NADPH cytochrome B5 oxidoreductase	BC025380	19263482	1464
B7	10233	B7 gene	BC029858	20988645	1032
BAALC	79870	brain and acute leukemia, cytoplasmic	BC011517	15079345	438
BAAT	570	bile acid Coenzyme A: amino acid N-acyltransferase (glycine N-choloyltransferase)	BC009567	16306984	1257
BACE	23621	beta-site APP-cleaving enzyme 1	BC036084	23273578	1506
BACE2	25825	beta-site APP-cleaving enzyme 2	BC014453	15680203	1557
BAD	572	BCL2-antagonist of cell death	BC001901	12804898	507
BAG3	9531		BC006418.1	13623600	1728
BAIAP2	10458	BAI1-associated protein 2	BC014020	15559319	1569
BAK1	578	BCL2-antagonist/killer 1	BC004431	13325223	636
BANK	55024	B-cell scaffold protein with ankyrin repeats 1	BC032241	21619549	2268
BANP	54971	BTG3 associated nuclear protein	BC009424	14495633	1410
BAP1	8314	BRCA1 associated protein-1 (ubiquitin carboxy-terminal hydrolase)	BC001596	12804390	2190
BASP1	10409	brain abundant, membrane attached signal protein 1	BC000518	12653492	684
BAT1	7919	HLA-B associated transcript 1	BC000361	12653186	1287
BAT4	7918	HLA-B associated transcript 4	BC008783	14250637	1071
BAT5	7920	HLA-B associated transcript 5	BC031839	21594332	1677
BBOX1	8424	butyrobetaine (gamma), 2-oxoglutarate dioxygenase (gamma-butyrobetaine hydroxylase) 1	BC011034	15029650	1164
BBS2	583	Bardet-Biedl syndrome 2	BC014140	15559554	2166
BBS4	585	Bardet-Biedl syndrome 4	BC027624	20379691	1560
BBS7	55212	Bardet-Biedl syndrome 7	BC032691	21619185	2019
BC-2	27243	putative breast adenocarcinoma marker (32kD)	BC002502	12803364	669
BCAS2	10286	breast carcinoma amplified sequence 2	BC005285	13528986	678
BCAT2	587	branched chain aminotransferase 2, mitochondrial	BC001900	12804896	1179
BCHE	590	butyrylcholinesterase	BC018141	17390311	1809
BCKDHA	593	branched chain keto acid dehydrogenase E1, alpha polypeptide (maple syrup urine disease)	BC008933	14286269	1338
BCKDK	10295	branched chain ketoacid dehydrogenase kinase	BC007363	13938443	1239
BCL2	596	B-cell CLL/lymphoma 2	BC027258	20072667	720
BCL2A1	597	BCL2-related protein A1	BC016281	16740835	528
BCL2L1	598	BCL2-like 1	BC019307	17939633	702
BCL2L13	23786	BCL2-like 13 (apoptosis facilitator)	BC007658	14043325	1458
BCL7B	9275	B-cell CLL/lymphoma 7B	BC000956	12803017	609
BCS1L	617	BCS1-like (yeast)	BC000416	12653294	1260
BDKRB1	623	bradykinin receptor B1	BC034705	21961598	1062
BDNF	627	brain-derived neurotrophic factor	BC029795	20987591	744
BECN1	8678	beclin 1 (coiled-coil, myosin-like BCL2 interacting protein)	BC010276	16307456	1353
BENE	7851	BENE protein	BC003179	13112010	462
BET1	10282	BET1 homolog (S. cerevisiae)	BC000899	12654162	357
BF	629	B-factor, properdin	BC004143	13278731	2295
BFAR	51283	bifunctional apoptosis regulator	BC003054	12804382	1353
BG1	23205	lipidosin	BC009289	14424531	2175
BGN	633	biglycan	BC002416	12803216	1107
BHMT2	23743	betaine-homocysteine methyltransferase 2	BC020665	18088852	1092
BIGM103	64116	solute carrier family 39 (zinc transporter), member 8	BC012125	15082418	1383
BIK	638	BCL2-interacting killer (apoptosis-inducing)	BC001599	12804394	483
BIKE	55589	BMP2 inducible kinase	BC036021	23271901	1989
BIRC2	329	baculoviral IAP repeat-containing 2	BC016174	16740584	1857
BIRC4	331	baculoviral IAP repeat-containing 4	BC032729	21619763	1494
BIRC7	79444	baculoviral IAP repeat-containing 7 (livin)	BC014475	15680240	897
BLNK	29760	B-cell linker	BC018906	17511913	1371
BLZF1	8548	basic leucine zipper nuclear factor 1 (JEM-1)	BC020716	18088413	1203
BMP4	652	bone morphogenetic protein 4	BC020546	18088238	1227
BMP7	655	bone morphogenetic protein 7 (osteogenic protein 1)	BC008584	14250308	1296
BMPR1A	657	bone morphogenetic protein receptor, type IA	BC028383	22382225	1599
BMX	660	BMX non-receptor tyrosine kinase	BC016652	16741711	2028
BNIP2	663	BCL2/adenovirus E1B 19kDa interacting protein 2	BC002461	12803290	945
BOK	666	BCL2-related ovarian killer	BC017214	16877998	639
BOP1	23246	block of proliferation 1	BC013787	15489384	2241
BRE	9577	brain and reproductive organ-expressed (TNFRSF1A modulator)	BC001251	12654816	1152
BRIX	55299	BRIX	BC036741	22477256	1062
BRRN1	23397		BC024211.1	18848310	2226
BRUNOL5	60680	bruno-like 5, RNA binding protein (Drosophila)	BC028101	20380220	1458
BS69	10771	zinc finger, MYND domain containing 11	BC034784	21961556	1584
BSCL2	26580	Bernardinelli-Seip congenital lipodystrophy 2 (seipin)	BC009866	14602685	1395
BTBD1	53339	BTB (POZ) domain containing 1	BC028097	20380069	1449
BTF3	689	basic transcription factor 3	BC008062	14165518	489
BTG1	694	B-cell translocation gene 1, anti-proliferative	BC016759	16876971	516
BTG3	10950	BTG family, member 3	BC011957	15080407	891
BTG4	54766	B-cell translocation gene 4	BC031045	21411346	621
BTN3A3	10384	butyrophilin, subfamily 3, member A3	BC015815	16198346	1755
BUB3	9184	BUB3 budding uninhibited by benzimidazoles 3 homolog (yeast)	BC005138	13477326	987
BY55	11126	CD160 antigen	BC014465	15680224	546
BYSL	705	bystin-like	BC007340	13938403	912
BZRP	706	benzodiazapine receptor (peripheral)	BC001110	12654552	510
BZW1	9689	basic leucine zipper and W2 domains 1	BC026303	20071147	1260
BZW2	28969	basic leucine zipper and W2 domains 2	BC003056	12804386	1260
C13orf12	51371	chromosome 13 open reading frame 12	BC003390	13097269	426
C17	54360	cytokine-like 1	BC031391	21594982	411
C1QB	713	complement component 1, q subcomponent, beta polypeptide	BC008983	14290437	762
C1QBP	708	complement component 1, q subcomponent binding protein	BC013731	15489258	849
C1QR1	22918	complement component 1, q subcomponent, receptor 1	BC028075	20381338	1959
C1QTNF1	114897	C1q and tumor necrosis factor related protein 1	BC021553	18204860	846
C1QTNF2	114898	C1q and tumor necrosis factor related protein 2	BC011699	15079785	858
C1QTNF4	114900	C1q and tumor necrosis factor related protein 4	BC035628	23243284	990
C1QTNF6	114904	C1q and tumor necrosis factor related protein 6	BC020551	18088688	837
C3AR1	719	complement component 3a receptor 1	BC020742	18088764	1449
C4BPA	722	complement component 4 binding protein, alpha	BC022312	18490165	1794
C4S-2	55501	carbohydrate (chondroitin 4) sulfotransferase 12	BC002918	12804130	1245
C5R1	728	complement component 5 receptor 1 (C5a ligand)	BC008982	14290435	1053
C6	729	complement component 6	BC035723	23273481	2805
C9	735	complement component 9	BC020721	18088820	1680
CA1	759	carbonic anhydrase I	BC027890	20380765	786
CA12	771	carbonic anhydrase XII	BC023981	18645128	1065
CA14	23632	carbonic anhydrase XIV	BC034412	21706778	1014
CA2	760	carbonic anhydrase II	BC011949	15080385	783
CA7	766	carbonic anhydrase VII	BC033865	21707175	795
CA9	768	carbonic anhydrase IX	BC014950	15928967	1380
CAB56184	84572	N-acetylglucosamine-1-phosphotransferase, gamma subunit	BC014592	15779034	915
CABP1	9478	calcium binding protein 1 (calbrain)	BC015006	21955445	915
CAC-1	113452	beta-casein-like protein	BC001418	13937594	669
CACNB1	782	calcium channel, voltage-dependent, beta 1 subunit	BC037311	22713565	1779
CACNG4	27092	calcium channel, voltage-dependent, gamma subunit 4	BC034532	21961609	984
CACNG6	59285	calcium channel, voltage-dependent, gamma subunit 6	BC021552	20987367	783
CAGE1	285782	cancer antigen 1	BC026194	20071566	2103
CALB1	793	calbindin 1, 28kDa	BC006478	13623700	786
CALML3	810	calmodulin-like 3	BC031889	21619432	450
CALN1	83698	calneuron 1	BC020200	18044198	660
CALR3	125972	calreticulin 3	BC014595	15779043	1155
CALU	813	calumenin	BC013383	15426540	948
CAMK1G	57172	calcium/calmodulin-dependent protein kinase IG	BC032787	21619664	1431
CAMK2D	817	calcium/calmodulin-dependent protein kinase (CaM kinase) II delta	BC032784	21619225	1437
CAMK2G	818	calcium/calmodulin-dependent protein kinase (CaM kinase) II gamma	BC034044	21707841	1584
CAMK4	814	calcium/calmodulin-dependent protein kinase IV	BC016695	16876820	1422
CAMKK1	84254	calcium/calmodulin-dependent protein kinase kinase 1, alpha	BC031647	21594835	1563
CAMKK2	10645		BC026060.2	33991300	1626
CANX	821	calnexin	BC003552	13097683	1779
CAP	10487	CAP, adenylate cyclase-associated protein 1 (yeast)	BC013963	15530329	1428
CAP2	10486	CAP, adenylate cyclase-associated protein, 2 (yeast)	BC008481	14250129	1434
CAPG	822	capping protein (actin filament), gelsolin-like	BC000728	12653872	1047
CAPN1	823	calpain 1, (mu/I) large subunit	BC008751	14250592	2145
CAPN10	11132	calpain 10	BC004260	13279049	2019
CAPN2	824	calpain 2, (m/II) large subunit	BC021303	18204176	2103
CAPN5	726	calpain 5	BC018123	17390274	1923
CAPN6	827	calpain 6	BC000730	12653876	1926
CAPZA1	829	capping protein (actin filament) muscle Z-line, alpha 1	BC000144	12652784	861
CARD9	64170	caspase recruitment domain family, member 9	BC008877	14250813	1479
CARKL	23729	carbohydrate kinase-like	BC020543	18088235	1437
CARP	27063	ankyrin repeat domain 1 (cardiac muscle)	BC018667	17391466	960
CARS	833	cysteinyl-tRNA synthetase	BC002880	12804054	2247
CASP2	835	caspase 2, apoptosis-related cysteine protease (neural precursor cell expressed, developmentally down-regulated 2)	BC002427	12803232	1308
CASP3	836	caspase 3, apoptosis-related cysteine protease	BC016926	16877343	834
CASP4	837	caspase 4, apoptosis-related cysteine protease	BC017839	17389624	1134
CASP6	839	caspase 6, apoptosis-related cysteine protease	BC000305	12653078	882
CASP7	840	caspase 7, apoptosis-related cysteine protease	BC015799	16041818	912
CASP9	842	caspase 9, apoptosis-related cysteine protease	BC002452	12803272	1251
CASQ1	844	calsequestrin 1 (fast-twitch, skeletal muscle)	BC022289	18490149	1173
CASQ2	845	calsequestrin 2 (cardiac muscle)	BC022288	18490362	1200
CAST	831	calpastatin	BC013579	15488897	2004
CAV1	857	caveolin 1, caveolae protein, 22kDa	BC009685	16307193	537
CBARA1	10367	calcium binding atopy-related autoantigen 1	BC016641	16741687	1431
CBFB	865	core-binding factor, beta subunit	BC018509	17391200	549
CBLB	868	Cas-Br-M (murine) ecotropic retroviral transforming sequence b	BC032851	23273908	2949
CBLC	23624	Cas-Br-M (murine) ecotropic retroviral transforming sequence c	BC028915	20809329	1425
CBR1	873	carbonyl reductase 1	BC002511	12803380	834
CBS	875	cystathionine-beta-synthase	BC011381	15030236	1656
CBX6	23466	chromobox homolog 6	BC012111	15082393	1239
CBX8	57332	chromobox homolog 8 (Pc class homolog, Drosophila)	BC008937	14286277	1170
CCIN	881	calicin	BC019251	17512603	1767
CCK	885	cholecystokinin	BC008283	14249822	348
CCKBR	887	cholecystokinin B receptor	BC000740	12653894	1344
CCL11	6356	chemokine (C-C motif) ligand 11	BC017850	17389651	294
CCL13	6357	chemokine (C-C motif) ligand 13	BC008621	14250376	297
CCL19	6363	chemokine (C-C motif) ligand 19	BC027968	20381244	297
CCL2	6347	chemokine (C-C motif) ligand 2	BC009716	16307254	300
CCL20	6364	chemokine (C-C motif) ligand 20	BC020698	18088856	288
CCL21	6366	chemokine (C-C motif) ligand 21	BC027918	20381253	405
CCL22	6367	chemokine (C-C motif) ligand 22	BC027952	20380789	282
CCL5	6352	chemokine (C-C motif) ligand 5	BC008600	14250338	276
CCNA1	8900	cyclin A1	BC036346	23271352	1395
CCNB1	891	cyclin B1	BC006510	13676353	1302
CCND1	595	cyclin D1 (PRAD1: parathyroid adenomatosis 1)	BC000076	12652656	888
CCND2	894	cyclin D2	BC010958	15012104	870
CCND3	896	cyclin D3	BC011616	15079590	879
CCNDBP1	23582	cyclin D-type binding-protein 1	BC009689	16307200	1083
CCNE1	898		BC035498.2	33879911	1233
CCNE2	9134	cyclin E2	BC020729	18088426	1125
CCNF	899	cyclin F	BC012349	15214442	2361
CCNG1	900	cyclin G1	BC000196	12652880	888
CCNG2	901	cyclin G2	BC032518	21619119	1035
CCNH	902	cyclin H	BC005280	13528977	972
CCNI	10983	cyclin I	BC000420	12653302	1134
CCNK	8812	cyclin K	BC015935	16198507	1065
CCR6	1235	chemokine (C-C motif) receptor 6	BC037960	23272702	1125
CCR7	1236	chemokine (C-C motif) receptor 7	BC035343	23243433	1137
CCRL2	9034	chemokine (C-C motif) receptor-like 2	BC025717	19343936	1035
CCT3	7203	chaperonin containing TCP1, subunit 3 (gamma)	BC006501	13676337	1635
CCT5	22948	chaperonin containing TCP1, subunit 5 (epsilon)	BC006543	16306836	1626
CCT7	10574	chaperonin containing TCP1, subunit 7 (eta)	BC019296	17939553	1632
CD151	977	CD151 antigen	BC001374	12655048	762
CD164	8763	CD164 antigen, sialomucin	BC011522	15079352	594
CD19	930	CD19 antigen	BC006338	13623470	1671
CD1A	909	CD1A antigen, a polypeptide	BC031645	21594950	936
CD2	914	CD2 antigen (p50), sheep red blood cell receptor	BC033583	21707369	1056
CD209L	10332	C-type lectin domain family 4, member M	BC038851	24416562	1200
CD24	934	CD24 antigen (small cell lung carcinoma cluster 4 antigen)	BC007674	14043361	243
CD2BP2	10421	CD2 antigen (cytoplasmic tail) binding protein 2	BC000495	12653446	1026
CD33	945	CD33 antigen (gp67)	BC028152	20381381	1095
CD34	947	CD34 antigen	BC039146	24657612	1122
CD36	948	CD36 antigen (collagen type I receptor, thrombospondin receptor)	BC008406	14250019	1419
CD38	952	CD38 antigen (p45)	BC007964	14044084	903
CD3Z	919	CD3Z antigen, zeta polypeptide (TiT3 complex)	BC025703	19344013	495
CD4	920	CD4 antigen (p55)	BC025782	19343584	1377
CD47	961	CD47 antigen (Rh-related antigen, integrin-associated signal transducer)	BC037306	22713603	918
CD48	962	CD48 antigen (B-cell membrane protein)	BC016182	16740596	732
CD5	921	CD5 antigen (p56-62)	BC027901	20379742	1488
CD59	966	CD59 antigen p18-20 (antigen identified by monoclonal antibodies 16.3A5, EJ16, EJ30, EL32 and G344)	BC001506	16306663	387
CD5L	922	CD5 antigen-like (scavenger receptor cysteine rich family)	BC033586	21707923	1044
CD6	923	CD6 antigen	BC033755	21707163	1920
CD63	967	CD63 antigen (melanoma 1 antigen)	BC002349	12803090	717
CD68	968	CD68 antigen	BC015557	15990394	1065
CD69	969	CD69 antigen (p60, early T-cell activation antigen)	BC007037	13937862	600
CD7	924	CD7 antigen (p41)	BC013297	15342050	723
CD74	972	CD74 antigen (invariant polypeptide of major histocompatibility complex, class II antigen-associated)	BC018726	17511739	699
CD81	975	CD81 antigen (target of antiproliferative antibody 1)	BC002978	12804238	711
CD83	9308	CD83 antigen (activated B lymphocytes, immunoglobulin superfamily)	BC030830	21410826	618
CD84	8832	CD84 antigen (leukocyte antigen)	BC020063	18043042	987
CD86	942	CD86 antigen (CD28 antigen ligand 2, B7-2 antigen)	BC040261	25955518	990
CD8A	925	CD8 antigen, alpha polypeptide (p32)	BC025715	19344021	708
CD9	928	CD9 antigen (p24)	BC011988	15080489	687
CD99	4267	CD99 antigen	BC002584	12803514	558
CD99L2	83692	CD99 antigen-like 2	BC030536	20988861	789
CDA08	81533	T-cell immunomodulatory protein	BC024162	18848294	1839
CDC20	991	CDC20 cell division cycle 20 homolog (S. cerevisiae)	BC001088	12654516	1500
CDC23	8697	CDC23 (cell division cycle 23, yeast, homolog)	BC017713	17389336	1776
CDC25A	993	cell division cycle 25A	BC007401	13938506	1575
CDC27	996	cell division cycle 27	BC011656	15079680	2493
CDC34	997	cell division cycle 34	BC023979	18645179	711
CDC37	11140	CDC37 cell division cycle 37 homolog (S. cerevisiae)	BC000083	12652668	1137
CDC42	998	cell division cycle 42 (GTP binding protein, 25kDa)	BC003682	13277547	576
CDC42EP1	11135	CDC42 effector protein (Rho GTPase binding) 1	BC009356	14424673	1155
CDC42EP2	10435	CDC42 effector protein (Rho GTPase binding) 2	BC022337	18490847	633
CDC42EP5	148170	CDC42 effector protein (Rho GTPase binding) 5	BC024327	19354243	447
CDC45L	8318	CDC45 cell division cycle 45-like (S. cerevisiae)	BC010022	14603105	1701
CDC5L	988	CDC5 cell division cycle 5-like (S. pombe)	BC001568	16306761	2409
CDC6	990	CDC6 cell division cycle 6 homolog (S. cerevisiae)	BC025232	19264107	1683
CDCA1	83540	cell division cycle associated 1	BC008489	14250143	1395
CDCA4	55038		BC011736.1	15079878	726
CDH13	1012	cadherin 13, H-cadherin (heart)	BC030653	21040439	2142
CDH15	1013	cadherin 15, M-cadherin (myotubule)	BC008951	14286299	2445
CDH16	1014	cadherin 16, KSP-cadherin	BC027912	34783283	2490
CDH18	1016	cadherin 18, type 2	BC031051	21410265	2373
CDK2	1017	cyclin-dependent kinase 2	BC003065	13111755	897
CDK2AP1	8099	CDK2-associated protein 1	BC034717	21961206	348
CDK4	1019	cyclin-dependent kinase 4	BC003644	13177738	912
CDK9	1025	cyclin-dependent kinase 9 (CDC2-related kinase)	BC001968	12805028	1119
CDKN2C	1031	cyclin-dependent kinase inhibitor 2C (p18, inhibits CDK4)	BC016173	18921420	507
CDKN2D	1032	cyclin-dependent kinase inhibitor 2D (p19, inhibits CDK4)	BC001822	12804764	501
CDO1	1036	cysteine dioxygenase, type I	BC024241	18999485	603
CDR2	1039	cerebellar degeneration-related protein 2, 62kDa	BC017503	17028382	1332
CDS2	8760	CDP-diacylglycerol synthase (phosphatidate cytidylyltransferase) 2	BC025751	19344051	1338
CDSN	1041	corneodesmosin	BC031993	21619291	1587
CDT1	81620	DNA replication factor	BC009410	14495612	1641
CDT6	10218	angiopoietin-like 7	BC001881	12804866	1041
CDW52	1043	CD52 antigen (CAMPATH-1 antigen)	BC000644	12653718	186
CDX2	1045	caudal type homeo box transcription factor 2	BC014461	15680218	942
CEACAM5	1048	carcinoembryonic antigen-related cell adhesion molecule 5	BC034671	21961633	2109
CEACAM8	1088	carcinoembryonic antigen-related cell adhesion molecule 8	BC026263	20072818	1050
CEBPB	1051	CCAAT/enhancer binding protein (C/EBP), beta	BC007538	14043104	1038
CEBPG	1054	CCAAT/enhancer binding protein (C/EBP), gamma	BC007582	14043188	453
CENPA	1058	centromere protein A, 17kDa	BC002703	12803732	423
CENPH	64946	centromere protein H	BC015355	15929865	744
CENTB1	9744	centaurin, beta 1	BC018543	17391288	2223
CES1	1066	carboxylesterase 1 (monocyte/macrophage serine esterase 1)	BC012418	15214584	1701
CES2	8824	carboxylesterase 2 (intestine, liver)	BC032095	22749766	1872
CESK1	150160	T-complex protein 1	BC033797	21708083	1674
CETN1	1068	centrin, EF-hand protein, 1	BC029515	20809601	519
CETP	1071	cholesteryl ester transfer protein, plasma	BC025739	19343605	1482
CFDP1	10428	craniofacial development protein 1	BC000991	12803034	900
CFL1	1072	cofilin 1 (non-muscle)	BC018256	17390593	501
CFLAR	8837	CASP8 and FADD-like apoptosis regulator	BC001602	12804400	1443
CG005	10443	phosphonoformate immuno-associated protein 5	BC010643	14714968	1752
CG1I	10467	zinc finger, HIT domain containing 1	BC017333	33878030	465
CGB	1082	chorionic gonadotropin, beta polypeptide	BC022796	22137521	498
CGBP	30827	CXXC finger 1 (PHD domain)	BC014940	15928940	1971
CGEF2	11069	Rap guanine nucleotide exchange factor (GEF) 4	BC024004	18645150	3036
CGI-04	51067	CGI-04 protein	BC015625	15990481	1434
CGI-111	51015	isochorismatase domain containing 1	BC014105	15559478	897
CGI-27	51072	chromosome 2 open reading frame 4	BC018733	17511761	894
CGI-51	25813	CGI-51 protein	BC015200	15929537	1410
CGI-58	51099	abhydrolase domain containing 5	BC021958	18314390	1050
CGR11	10669	cell growth regulator with EF hand domain 1	BC034764	21961321	906
CH25H	9023	cholesterol 25-hydroxylase	BC017843	17389635	819
CHC1	1104	chromosome condensation 1	BC007300	13938340	1266
CHC1L	1102	chromosome condensation 1-like	BC029052	20810514	1656
CHEK1	1111	CHK1 checkpoint homolog (S. pombe)	BC004202	13278881	1431
CHEK2	11200	CHK2 checkpoint homolog (S. pombe)	BC004207	13278893	1632
CHES1	1112	checkpoint suppressor 1	BC010460	14714641	189
CHFR	55743	checkpoint with forkhead and ring finger domains	BC012072	15082329	1959
CHGA	1113	chromogranin A (parathyroid secretory protein 1)	BC001059	12654462	1374
CHGB	1114	chromogranin B (secretogranin 1)	BC000375	12653214	2034
CHI3L1	1116	chitinase 3-like 1 (cartilage glycoprotein-39)	BC008568	14919432	1152
CHI3L2	1117	chitinase 3-like 2	BC011460	15079251	1173
CHIC2	26511	cysteine-rich hydrophobic domain 2	BC034691	21961596	498
CHN1	1123	chimerin (chimaerin) 1	BC011393	15030253	1380
CHODL	140578	chondrolectin	BC009418	14495622	822
CHRAC1	54108	chromatin accessibility complex 1	BC015891	16198440	396
CHRM1	1128	cholinergic receptor, muscarinic 1	BC022984	18605808	1383
CHRNA5	1138	cholinergic receptor, nicotinic, alpha polypeptide 5	BC033639	21707198	1407
CHRNB1	1140	cholinergic receptor, nicotinic, beta polypeptide 1 (muscle)	BC011371	15030221	1506
CHST10	9486	carbohydrate sulfotransferase 10	BC010441	14714606	1071
CHST4	10164	carbohydrate (N-acetylglucosamine 6-O) sulfotransferase 4	BC035282	23273964	1113
CHST8	64377	carbohydrate (N-acetylgalactosamine 4-0) sulfotransferase 8	BC011380	15030234	1275
CIAO1	9391	WD repeat domain 39	BC001395	12655088	1020
CIB1	10519	calcium and integrin binding 1 (calmyrin)	BC000846	12654074	576
cig5	91543	radical S-adenosyl methionine domain containing 2	BC017969	17389924	1086
CILP	8483	cartilage intermediate layer protein, nucleotide pyrophosphohydrolase	BC035776	23272760	3555
CIRBP	1153	cold inducible RNA binding protein	BC000901	12654166	519
CITED1	4435	Cbp/p300-interacting transactivator, with Glu/Asp-rich carboxy-terminal domain, 1	BC004240	13278989	582
CITED2	10370		BC004377.1	13325127	813
CKAP1	1155	cytoskeleton associated protein 1	BC005969	13543641	735
CKIP-1	51177		BC010149.1	14603393	1230
CKLF	51192		BC004380.1	13325133	459
CKLFSF2	146225	chemokine-like factor super family 2	BC025354	19263729	747
CKLiK	57118	calcium/calmodulin-dependent protein kinase ID	BC035745	23273490	1158
CKM	1158	creatine kinase, muscle	BC007462	13938618	1146
CKMT1	1159		BC001926.1	12804946	1254
CKMT2	1160	creatine kinase, mitochondrial 2 (sarcomeric)	BC029140	20810520	1260
CKS1B	1163	CDC28 protein kinase regulatory subunit 1B	BC015629	15990488	240
CL25084	27248	chromosome 2 open reading frame 30	BC013129	15341890	1452
CL640	27235	hypothetical protein CL640	BC008804	14250675	1116
CLC	23529	cardiotrophin-like cytokine factor 1	BC012939	15277894	678
CLCN7	1186	chloride channel 7	BC012737	15215299	2418
CLDN1	9076	claudin 1	BC012471	15214677	636
CLDN10	9071	claudin 10	BC010920	15012044	687
CLDN11	5010	claudin 11 (oligodendrocyte transmembrane protein)	BC013577	15488893	624
CLDN14	23562	claudin 14	BC012126	15082420	720
CLDN2	9075	claudin 2	BC014424	15680158	693
CLDN3	1365	claudin 3	BC016056	16359182	663
CLDN4	1364	claudin 4	BC000671	12653770	630
CLDN8	9073	claudin 8	BC020866	18089189	678
CLEC1	51267	C-type lectin domain family 1, member A	BC039072	24660225	843
CLECSF2	9976	C-type lectin domain family 2, member B	BC005254	13528920	450
CLECSF8	338339	C-type lectin domain family 4, member D	BC032313	21595254	648
CLGN	1047	calmegin	BC028357	20306235	1833
CLIC2	1193	chloride intracellular channel 2	BC022305	18490161	744
CLIC5	53405	chloride intracellular channel 5	BC035968	23273551	756
CLN2	1200	tripeptidyl peptidase I	BC014863	15928807	1692
CLN6	54982	ceroid-lipofuscinosis, neuronal 6, late infantile, variant	BC010849	14789999	936
CLONE24922	26995	TruB pseudouridine (psi) synthase homolog 2 (E. coli)	BC001457	12655198	996
CLPP	8192	ClpP caseinolytic protease, ATP-dependent, proteolytic subunit homolog (E. coli)	BC002956	12804196	834
CLPTM1	1209	cleft lip and palate associated transmembrane protein 1	BC012359	15214471	2010
CLSTN1	22883	calsyntenin 1	BC033902	21706695	2916
CLU	1191	clusterin (complement lysis inhibitor, SP-40,40, sulfated glycoprotein 2, testosterone-repressed prostate message 2, apolipoprotein J)	BC010514	14714740	1350
CLUL1	27098	clusterin-like 1 (retinal)	BC025381	19263976	1401
CMRF35	10871	CD300C antigen	BC022279	18490142	675
CNK1	10256	connector enhancer of kinase suppressor of Ras 1	BC011604	15079555	2163
CNN3	1266	calponin 3, acidic	BC025372	33869453	990
CNNM3	26505	cyclin M3	BC037272	22713388	2124
CNP	1267	2',3'-cyclic nucleotide 3' phosphodiesterase	BC001362	12655028	1266
CNTFR	1271	ciliary neurotrophic factor receptor	BC001492	16306633	1119
COG1	9382	component of oligomeric golgi complex 1	BC021985	18314386	2943
COG2	22796	component of oligomeric golgi complex 2	BC014960	15928995	2217
COIL	8161	coilin	BC010385	14714508	1731
COL1A1	1277	collagen, type I, alpha 1	BC036531	22328091	4395
COL8A1	1295	collagen, type VIII, alpha 1	BC013581	15488903	2235
COL9A3	1299	collagen, type IX, alpha 3	BC011705	15079800	2055
COMP	1311	cartilage oligomeric matrix protein	BC033676	21707184	2175
COMT	1312		BC011935.1	15080363	816
COPB	1315	coatomer protein complex, subunit beta	BC037280	22713552	2862
COPE	11316		BC003155.1	13111964	927
COPEB	1316	Kruppel-like factor 6	BC000311	12653090	852
COPS4	51138	COP9 constitutive photomorphogenic homolog subunit 4 (Arabidopsis)	BC004302	13279172	1221
COPS6	10980	COP9 constitutive photomorphogenic homolog subunit 6 (Arabidopsis)	BC002520	12803394	894
COPS7A	50813	COP9 constitutive photomorphogenic homolog subunit 7A (Arabidopsis)	BC011789	15080009	828
COPZ2	51226	coatomer protein complex, subunit zeta 2	BC015924	16198486	633
COQ6	51004	coenzyme Q6 homolog (yeast)	BC014181	15559648	1407
CORO1B	57175		BC006449.1	13623648	1470
CORO2A	7464	coronin, actin binding protein, 2A	BC000010	13111698	1578
CORO2B	10391	coronin, actin binding protein, 2B	BC026335	20070951	1428
COX10	1352	COX10 homolog, cytochrome c oxidase assembly protein, heme A: farnesyltransferase (yeast)	BC000060	12652628	1332
COX11	1353	COX11 homolog, cytochrome c oxidase assembly protein (yeast)	BC005895	13543474	831
COX15	1355	COX15 homolog, cytochrome c oxidase assembly protein (yeast)	BC002382	12803156	1233
COX4I1	1327	cytochrome c oxidase subunit IV isoform 1	BC008704	14250513	510
COX5A	9377	cytochrome c oxidase subunit Va	BC024240	18999391	453
COX5B	1329	cytochrome c oxidase subunit Vb	BC006229	13623258	390
COX6A1	1337	cytochrome c oxidase subunit VIa polypeptide 1	BC007723	14043465	330
COX6A2	1339	cytochrome c oxidase subunit VIa polypeptide 2	BC029818	20987427	294
COX6B	1340	cytochrome c oxidase subunit Vib polypeptide 1 (ubiquitous)	BC001015	12654382	261
COX6C	1345	cytochrome c oxidase subunit VIc	BC000187	12652866	228
COX7A1	1346	cytochrome c oxidase subunit VIIa polypeptide 1 (muscle)	BC002757	12803832	240
COX7A2L	9167	cytochrome c oxidase subunit VIIa polypeptide 2 like	BC005251	13528911	345
COX7B	1349	cytochrome c oxidase subunit VIIb	BC018386	17390908	243
COX7C	1350	cytochrome c oxidase subunit VIIc	BC001005	12654364	192
CPA1	1357	carboxypeptidase A1 (pancreatic)	BC005279	13528974	1260
CPA2	1358	carboxypeptidase A2 (pancreatic)	BC007009	13937814	1254
CPA3	1359	carboxypeptidase A3 (mast cell)	BC012613	15214964	1254
CPA6	57094	carboxypeptidase A6	BC033684	21708069	1314
CPB1	1360	carboxypeptidase B1 (tissue)	BC015338	15929838	1254
CPB2	1361	carboxypeptidase B2 (plasma, carboxypeptidase U)	BC007057	13937896	1272
CPE	1363	carboxypeptidase E	BC033866	21707498	1431
CPM	1368	carboxypeptidase M	BC022276	18490601	1332
CPN1	1369	carboxypeptidase N, polypeptide 1, 50kD	BC027897	20379783	1377
CPNE4	131034	copine IV	BC014396	15680117	1674
CPNE6	9362	copine VI (neuronal)	BC018046	17390084	1674
CPR2	9238	transforming growth factor beta regulator 4	BC014918	15928906	1896
CPSF1	29894	cleavage and polyadenylation specific factor 1, 160kDa	BC017232	16878040	4332
CPSF3	51692	cleavage and polyadenylation specific factor 3, 73kDa	BC011654	15079674	2055
CPSF5	11051	cleavage and polyadenylation specific factor 5, 25 kDa	BC001403	12655102	684
CPSF6	11052	cleavage and polyadenylation specific factor 6, 68kDa	BC000714	12653846	1767
CPT1C	126129	carnitine palmitoyltransferase 1C	BC029104	20810095	2379
CPVL	54504	carboxypeptidase, vitellogenic-like	BC016838	16877132	1431
CPXCR1	53336	CPX chromosome region, candidate 1	BC027614	20380662	906
CRABP1	1381	cellular retinoic acid binding protein 1	BC022069	18314499	414
CRABP2	1382	cellular retinoic acid binding protein 2	BC001109	12654550	417
CRADD	8738	CASP2 and RIPK1 domain containing adaptor with death domain	BC017042	16877580	600
CREB1	1385	cAMP responsive element binding protein 1	BC010636	14714955	1026
CREG	8804	cellular repressor of E1A-stimulated genes 1	BC006786	13905007	663
CRIP1	1396	cysteine-rich protein 1 (intestinal)	BC002738	12803796	234
CRIP2	1397	cysteine-rich protein 2	BC000434	12653330	627
CRK	1398	v-crk sarcoma virus CT10 oncogene homolog (avian)	BC008506	14250172	915
CRLF3	51379	cytokine receptor-like factor 3	BC023567	23270803	1317
CRMP1	1400	collapsin response mediator protein 1	BC000252	12652982	1719
CRR9	81037	cisplatin resistance related protein CRR9p	BC025305	19263701	1617
CRTAP	10491	cartilage associated protein	BC008745	14250580	1206
CRX	1406	cone-rod homeobox	BC016664	16741737	900
CRYAB	1410	crystallin, alpha B	BC007008	13937812	528
CRYM	1428	crystallin, mu	BC018061	17390127	945
CRYZL1	9946	crystallin, zeta (quinone reductase)-like 1	BC033023	21542558	1050
CSDA	8531	cold shock domain protein A	BC008801	14250671	1119
CSEN	30818	calsenilin, presenilin binding protein, EF hand transcription factor	BC012850	15277494	771
CSF1	1435	colony stimulating factor 1 (macrophage)	BC021117	18088910	1665
CSF2RA	1438	colony stimulating factor 2 receptor, alpha, low-affinity (granulocyte-macrophage)	BC002635	12803600	1203
CSH2	1443	chorionic somatomammotropin hormone 2	BC022044	18314451	654
CSNK1E	1454	casein kinase 1, epsilon	BC006490	13676317	1251
CSNK1G2	1455	casein kinase 1, gamma 2	BC020972	18088089	1248
CSNK2A1	1457	casein kinase 2, alpha 1 polypeptide	BC011668	15079695	1176
CSNK2A2	1459	casein kinase 2, alpha prime polypeptide	BC008812	14250691	1053
CSRP2	1466	cysteine and glycine-rich protein 2	BC000992	12803035	582
CSRP2BP	57325	CSRP2 binding protein	BC007537	14043102	2349
CSRP3	8048	cysteine and glycine-rich protein 3 (cardiac LIM protein)	BC005900	13543482	585
CST	9514	galactose-3-O-sulfotransferase 1	BC014649	15779171	1272
CST3	1471	cystatin C (amyloid angiopathy and cerebral hemorrhage)	BC013083	15341821	441
CST9L	128821	cystatin 9-like (mouse)	BC029656	20987685	444
CSTB	1476	cystatin B (stefin B)	BC003370	13097209	297
CSTF1	1477	cleavage stimulation factor, 3' pre-RNA, subunit 1, 50kDa	BC001011	12654374	1296
CSTF2	1478	cleavage stimulation factor, 3' pre-RNA, subunit 2, 64kDa	BC017712	17389333	1734
CTBP1	1487	C-terminal binding protein 1	BC011655	15079677	1323
CTCF	10664	CCCTC-binding factor (zinc finger protein)	BC014267	15679929	2184
CTNNA1	1495	catenin (cadherin-associated protein), alpha 1, 102kDa	BC000385	12653232	2721
CTSD	1509	cathepsin D (lysosomal aspartyl protease)	BC016320	16740919	1239
CTSF	8722	cathepsin F	BC011682	15079737	1455
CTSG	1511	cathepsin G	BC014460	15680216	768
CTSH	1512	cathepsin H	BC002479	12803322	1008
CTSL	1514	cathepsin L	BC012612	15214961	1002
CTXL	23584	V-set and immunoglobulin domain containing 2	BC007313	13938361	984
CUGBP1	10658	CUG triplet repeat, RNA binding protein 1	BC031079	21411009	1452
CUL4A	8451	cullin 4A	BC008308	14249865	1980
CUL4B	8450	cullin 4B	BC036216	23958536	2742
CX3CL1	6376	chemokine (C-X3-C motif) ligand 1	BC016164	16740573	1194
CX3CR1	1524	chemokine (C-X3-C motif) receptor 1	BC028078	20380136	1068
CXADR	1525	coxsackie virus and adenovirus receptor	BC003684	13277551	1098
CXCL1	2919	chemokine (C-X-C motif) ligand 1 (melanoma growth stimulating activity, alpha)	BC011976	15080461	324
CXCL10	3627	chemokine (C-X-C motif) ligand 10	BC010954	15012098	297
CXCL11	6373	chemokine (C-X-C motif) ligand 11	BC005292	13529004	285
CXCL3	2921	chemokine (C-X-C motif) ligand 3	BC016308	16740894	324
CXCL5	6374	chemokine (C-X-C motif) ligand 5	BC008376	14249978	345
CXCL6	6372	chemokine (C-X-C motif) ligand 6 (granulocyte chemotactic protein 2)	BC013744	15489286	345
CXCR3	2833	chemokine (C-X-C motif) receptor 3	BC034403	21707783	1107
CXCR6	10663	chemokine (C-X-C motif) receptor 6	BC033584	21707372	1029
CXX1	8933	CAAX box 1	BC002410	12803204	630
CYB5	1528	cytochrome b-5	BC015182	15929505	405
CYBA	1535	cytochrome b-245, alpha polypeptide	BC006465	13623676	588
CYBB	1536	cytochrome b-245, beta polypeptide (chronic granulomatous disease)	BC032720	21618560	1713
CYC1	1537	cytochrome c-1	BC020566	18088252	978
CYCS	54205	cytochrome c, somatic	BC005299	13529022	318
CYFIP1	23191	cytoplasmic FMR1 interacting protein 1	BC005097	13477256	3762
CYFIP2	26999	cytoplasmic FMR1 interacting protein 2	BC011762	15079948	3762
CYP11A1	1583	cytochrome P450, family 11, subfamily A, polypeptide 1	BC032329	21619043	1566
CYP1A1	1543	cytochrome P450, family 1, subfamily A, polypeptide 1	BC023019	18606396	1539
CYP20A1	57404	cytochrome P450, family 20, subfamily A, polypeptide 1	BC033752	21707108	1389
CYP2C8	1558	cytochrome P450, family 2, subfamily C, polypeptide 8	BC020596	18088281	1473
CYP2J2	1573	cytochrome P450, family 2, subfamily J, polypeptide 2	BC032594	21595666	1509
CYP2S1	29785	cytochrome P450, family 2, subfamily S, polypeptide 1	BC033691	21707057	1515
CYP39A1	51302	cytochrome P450, family 39, subfamily A, polypeptide 1	BC010358	14714463	1410
CYP3A5	1577	cytochrome P450, family 3, subfamily A, polypeptide 5	BC033862	21708043	1509
CYP46A1	10858	cytochrome P450, family 46, subfamily A, polypeptide 1	BC022539	18490314	1503
CYP4B1	1580	cytochrome P450, family 4, subfamily B, polypeptide 1	BC017758	17389423	1539
CYP4F11	57834	cytochrome P450, family 4, subfamily F, polypeptide 11	BC016853	16877171	1575
CYP4F12	66002	cytochrome P450, family 4, subfamily F, polypeptide 12	BC035350	23243429	1575
CYP4X1	260293	cytochrome P450, family 4, subfamily X, polypeptide 1	BC028102	20380153	1530
CYP51A1	1595	cytochrome P450, family 51, subfamily A, polypeptide 1	BC032322	21619562	1530
CYR61	3491	cysteine-rich, angiogenic inducer, 61	BC001271	12654854	1146
CYSLTR1	10800	cysteinyl leukotriene receptor 1	BC035750	23272742	1014
D21S2056E	8568	DNA segment on chromosome 21 (unique) 2056 expressed sequence	BC000380	12653222	1386
DAB2	1601	disabled homolog 2, mitogen-responsive phosphoprotein (Drosophila)	BC003064	13111753	2313
DAD1	1603	defender against cell death 1	BC007403	13938510	342
DAF	1604	decay accelerating factor for complement (CD55, Cromer blood group system)	BC001288	12654888	1146
DAG1	1605	dystroglycan 1 (dystrophin-associated glycoprotein 1)	BC012740	15215307	2688
DAO	1610	D-amino-acid oxidase	BC029057	20809783	1044
DAPP1	27071	dual adaptor of phosphotyrosine and 3-phosphoinositides	BC012924	15277835	843
DARS	1615	aspartyl-tRNA synthetase	BC000629	12653688	1506
DATF1	11083	death associated transcription factor 1	BC004237	13278980	1689
DAZL	1618	deleted in azoospermia-like	BC027595	20379545	888
DBH	1621	dopamine beta-hydroxylase (dopamine beta-monooxygenase)	BC017174	16877892	1812
DBP	1628	D site of albumin promoter (albumin D-box) binding protein	BC011965	15080431	978
DBR1	51163	debranching enzyme homolog 1 (S. cerevisiae)	BC009472	14495720	1635
DC12	56941	DC12 protein	BC009993	14603027	1065
DC13	56942	DC13 protein	BC032631	21595752	240
DC2	58505	DC2 protein	BC016321	16740922	450
DC8	25936	chromosome 1 open reading frame 48	BC007067	13937915	846
DCN	1634	decorin	BC005322	13529085	1080
DCT	1638	dopachrome tautomerase (dopachrome delta-isomerase, tyrosine-related protein 2)	BC028311	20271406	1560
DCTN3	11258	dynactin 3 (p22)	BC000319	12653104	531
DCTN4	51164	dynactin 4 (p62)	BC026323	20070940	1383
DDB2	1643	damage-specific DNA binding protein 2, 48kDa	BC000093	12652688	1284
DDC	1644	dopa decarboxylase (aromatic L-amino acid decarboxylase)	BC000485	12653428	1443
DDOST	1650	dolichyl-diphosphooligosaccharide-protein glycosyltransferase	BC002594	12803530	1371
DDT	1652	D-dopachrome tautomerase	BC015508	15930139	357
DDX16	8449	DEAH (Asp-Glu-Ala-His) box polypeptide 16	BC008825	14250711	3129
DDX20	11218	DEAD (Asp-Glu-Ala-Asp) box polypeptide 20	BC011556	15079430	2475
DDX21	9188	DEAD (Asp-Glu-Ala-Asp) box polypeptide 21	BC004182	13278830	2148
DDX24	57062	DEAD (Asp-Glu-Ala-Asp) box polypeptide 24	BC008847	14250755	2580
DDX30	22907	DEAH (Asp-Glu-Ala-His) box polypeptide 30	BC020126	18043039	3585
DDX32	55760	DEAH (Asp-Glu-Ala-His) box polypeptide 32	BC002473	12803310	2232
DDX36	170506	DEAH (Asp-Glu-Ala-His) box polypeptide 36	BC036035	23243422	2940
DDX38	9785	DEAH (Asp-Glu-Ala-His) box polypeptide 38	BC004235	13278974	3684
DDX39	10212	DEAD (Asp-Glu-Ala-Asp) box polypeptide 39	BC001009	12654372	1284
DDX5	1655	DEAD (Asp-Glu-Ala-Asp) box polypeptide 5	BC016027	16359121	1845
DEFA1	1667	defensin, alpha 1, myeloid-related sequence	BC027917	20379719	285
DEPP	11067	chromosome 10 open reading frame 10	BC011402	15030263	639
DES	1674	desmin	BC032116	33878070	1413
DGAT1	8694	diacylglycerol O-acyltransferase homolog 1 (mouse)	BC023565	23273785	1467
DGCR14	8220	DiGeorge syndrome critical region gene 14	BC006542	16306833	1431
DGCR2	9993	DiGeorge syndrome critical region gene 2	BC032430	21595344	1653
DGKA	1606	diacylglycerol kinase, alpha 80kDa	BC031870	21618886	2208
DHCR24	1718		BC004375.1	13325123	1551
DHCR7	1717	7-dehydrocholesterol reductase	BC000054	12652616	1428
DHDH	27294	dihydrodiol dehydrogenase (dimeric)	BC032730	21619205	1005
DHFR	1719	dihydrofolate reductase	BC000192	12652874	564
DHRSX	207063	dehydrogenase/reductase (SDR family) X-linked	BC032340	21619582	993
DIBD1	79796	asparagine-linked glycosylation 9 homolog (yeast, alpha 1,2 mannosyltransferase)	BC009255	14328091	1857
DIP13B	55198	DIP13 beta	BC033731	21707122	1995
DIRAS1	148252	DIRAS family, GTP-binding RAS-like 1	BC030660	21040534	597
DJ1042K10.2	27352	RUN and TBC1 domain containing 3	BC008078	14165548	2250
DJ473B4	56180	motile sperm domain containing 1	BC005700	13543043	642
DJ667H12.2	56256	SERTA domain containing 4	BC012083	15082345	1071
DKC1	1736	dyskeratosis congenita 1, dyskerin	BC009928	14602858	1545
DKFZP434D0127	84101	ubiquitin specific protease 44	BC030704	21265142	2139
DKFZP434E2318	84078	kelch repeat and BTB (POZ) domain containing 7	BC022033	18314477	2055
DKFZp434G171	54751	filamin-binding LIM protein-1	BC019895	18044299	1122
DKFZp434N2435	84217	zinc finger, MYND domain containing 12	BC024186	18848212	1098
DKFZp547D065	56975	family with sequence similarity 20, member C	BC040074	25304011	1713
DKFZp547M109	221914	glypican 2 (cerebroglycan)	BC027972	20381265	1740
DKFZP564G202	26002	monooxygenase, DBH-like 1	BC018756	17511809	1842
DKK1	22943	dickkopf homolog 1 (Xenopus laevis)	BC001539	16306719	801
DKK3	27122	dickkopf homolog 3 (Xenopus laevis)	BC007660	14043329	1053
DLAT	1737	dihydrolipoamide S-acetyltransferase (E2 component of pyruvate dehydrogenase complex)	BC039084	25058599	1944
DLEU1	10301	deleted in lymphocytic leukemia, 1	BC020692	18088389	237
DLL3	10683	delta-like 3 (Drosophila)	BC000218	12652922	1857
DLX1	1745	distal-less homeo box 1	BC036189	23273604	708
DLX3	1747	distal-less homeo box 3	BC012361	15214474	864
DMAP1	55929	DNA methyltransferase 1 associated protein 1	BC002855	12804006	1404
DNAI1	27019	dynein, axonemal, intermediate polypeptide 1	BC030583	21040510	2100
DNAJA1	3301	DnaJ (Hsp40) homolog, subfamily A, member 1	BC008182	14198244	1194
DNAJB11	51726	DnaJ (Hsp40) homolog, subfamily B, member 11	BC001144	12654614	1077
DNAJB4	11080	DnaJ (Hsp40) homolog, subfamily B, member 4	BC034721	21961218	1014
DNAJB5	25822	DnaJ (Hsp40) homolog, subfamily B, member 5	BC012115	15082400	1161
DNAJB9	4189	DnaJ (Hsp40) homolog, subfamily B, member 9	BC028912	20809326	672
DNAJC7	7266	DnaJ (Hsp40) homolog, subfamily C, member 7	BC011837	15080123	1455
DNASE1	1773	deoxyribonuclease I	BC029437	20810453	849
DNASE1L1	1774	deoxyribonuclease I-like 1	BC028092	24081083	909
DNASE1L3	1776	deoxyribonuclease I-like 3	BC015831	16198370	918
DNER	92737	delta-notch-like EGF repeat-containing transmembrane	BC035009	23273318	2214
DNM1L	10059	dynamin 1-like	BC024590	19352980	2133
DNMT3L	29947	DNA (cytosine-5-)-methyltransferase 3-like	BC002560	12803470	1161
DNPEP	23549	aspartyl aminopeptidase	BC000653	12653734	1458
DNTT	1791	deoxynucleotidyltransferase, terminal	BC012920	15277812	1530
DOK2	9046	docking protein 2, 56kDa	BC032623	21618482	1239
DOK4	55715	docking protein 4	BC003541	13097653	981
DOM3Z	1797	dom-3 homolog Z (C. elegans)	BC009344	14424641	1191
DPEP1	1800	dipeptidase 1 (renal)	BC017023	16877538	1236
DPH2L1	1801	DPH2-like 1 (S. cerevisiae)	BC003099	13111862	1092
DPP3	10072	dipeptidylpeptidase 3	BC001446	12655178	2214
DPP7	29952	dipeptidylpeptidase 7	BC016961	16877429	1479
DPP8	54878	dipeptidylpeptidase 8	BC040203	26007916	2649
DPP9	91039	dipeptidylpeptidase 9	BC037948	33991522	2592
DPRP3	57628	dipeptidylpeptidase 10	BC030832	22658412	2391
DPT	1805	dermatopontin	BC033736	21708098	606
DPYSL5	56896	dihydropyrimidinase-like 5	BC002874	12804042	1695
DRCTNNB1A	84668	down-regulated by Ctnnb1, a	BC018710	17511708	1566
DRD2	1813	dopamine receptor D2	BC021195	18203702	1332
DRD5	1816	dopamine receptor D5	BC009748	14602484	1434
DRG1	4733	developmentally regulated GTP binding protein 1	BC019285	17939478	1104
DRG2	1819	developmentally regulated GTP binding protein 2	BC000493	12653442	1095
DSCR1L1	10231	Down syndrome critical region gene 1-like 1	BC038509	23620411	678
DSCR1L2	11123	Down syndrome critical region gene 1-like 2	BC035854	23272735	726
DSCR2	8624	Down syndrome critical region gene 2	BC003619	13177669	867
DTX2	113878	deltex homolog 2 (Drosophila)	BC008856	14250773	1869
DUSP1	1843	dual specificity phosphatase 1	BC022463	18490272	1104
DUSP10	11221	dual specificity phosphatase 10	BC031405	21594978	1449
DUSP11	8446	dual specificity phosphatase 11 (RNA/RNP complex 1-interacting)	BC000346	12653156	993
DUSP12	11266	dual specificity phosphatase 12	BC006286	13623373	1023
DUSP13	51207	dual specificity phosphatase 13	BC009778	14602534	597
DUSP14	11072	dual specificity phosphatase 14	BC000370	12653204	597
DUSP19	142679	dual specificity phosphatase 19	BC035000	23273914	654
DUSP3	1845	dual specificity phosphatase 3 (vaccinia virus phosphatase VH1-related)	BC002682	12803692	558
DUSP6	1848	dual specificity phosphatase 6	BC003562	13097713	1146
DUT	1854	dUTP pyrophosphatase	BC033645	21708113	495
DVL3	1857	dishevelled, dsh homolog 3 (Drosophila)	BC032459	21595560	2151
DXS1283E	8228	patatin-like phospholipase domain containing 4	BC020746	18089126	762
DYRK1B	9149	dual-specificity tyrosine-(Y)-phosphorylation regulated kinase 1B	BC018751	17511802	1890
DYRK4	8798	dual-specificity tyrosine-(Y)-phosphorylation regulated kinase 4	BC031244	21411487	1563
DYT1	1861	torsin family 1, member A (torsin A)	BC000674	12653776	999
E2F4	1874	E2F transcription factor 4, p107/p130-binding	BC033180	21619905	1242
E2IG4	25987	likely ortholog of chicken tsukushi	BC020975	18088095	1062
E46L	25814	ataxin 10	BC007508	13960134	1428
EAF2	55840	ELL associated factor 2	BC014209	15559704	783
EAT2	117157	SH2 domain-containing molecule EAT2	BC022407	18490408	399
EBAG9	9166	estrogen receptor binding site associated, antigen, 9	BC017729	17389375	642
EBI2	1880	Epstein-Barr virus induced gene 2 (lymphocyte-specific G protein-coupled receptor)	BC020752	18089130	1086
EBI3	10148	Epstein-Barr virus induced gene 3	BC015364	15929884	690
EBP	10682	emopamil binding protein (sterol isomerase)	BC001572	16306767	693
EBRP	84650	emopamil binding protein-like	BC018478	17391124	621
ECGF1	1890	endothelial cell growth factor 1 (platelet-derived)	BC018160	17390354	1449
ECH1	1891	enoyl Coenzyme A hydratase 1, peroxisomal	BC011792	15080015	987
ECM1	1893	extracellular matrix protein 1	BC023505	33870014	1623
ECRG4	84417	esophageal cancer related gene 4 protein	BC021742	18204373	447
EDF1	8721	endothelial differentiation-related factor 1	BC015500	15930117	447
EDG8	53637	endothelial differentiation, sphingolipid G-protein-coupled receptor, 8	BC034703	21961527	1197
EDN1	1906	endothelin 1	BC009720	16307263	639
EDNRA	1909	endothelin receptor type A	BC022511	18490297	1284
EEF1A1	1915	eukaryotic translation elongation factor 1 alpha 1	BC009733	16307286	1389
EEF1A2	1917	eukaryotic translation elongation factor 1 alpha 2	BC000432	12653326	1392
EEF1E1	9521	eukaryotic translation elongation factor 1 epsilon 1	BC005291	13529001	525
EEF1G	1937	eukaryotic translation elongation factor 1 gamma	BC015813	16041843	1314
EEF2K	29904	eukaryotic elongation factor-2 kinase	BC032665	21618567	2178
EFEMP1	2202	EGF-containing fibulin-like extracellular matrix protein 1	BC014410	15680134	1482
EFEMP2	30008	EGF-containing fibulin-like extracellular matrix protein 2	BC010456	14714633	1332
EFHC1	114327	EF-hand domain (C-terminal) containing 1	BC020210	18044374	1923
EFNA1	1942	ephrin-A1	BC032698	21618450	618
EFNA3	1944	ephrin-A3	BC017722	17389356	717
EFNB1	1947	ephrin-B1	BC016649	19116187	1041
EG1	80306		BC011936.1	15080366	537
EGFL6	25975	EGF-like-domain, multiple 6	BC038587	24047223	1662
EHD2	30846	EH-domain containing 2	BC014445	15680191	1632
EHD4	30844	EH-domain containing 4	BC006287	13623376	1626
EI24	9538	etoposide induced 2.4 mRNA	BC002390	12803170	1023
EIF1AY	9086	eukaryotic translation initiation factor 1A, Y-linked	BC005248	13528902	435
eIF2a	83939		BC011885.1	15080228	1758
EIF2B2	8892	eukaryotic translation initiation factor 2B, subunit 2 beta, 39kDa	BC000494	12653444	1056
EIF2B5	8893	eukaryotic translation initiation factor 2B, subunit 5 epsilon, 82kDa	BC013590	15488925	2166
EIF2S1	1965	eukaryotic translation initiation factor 2, subunit 1 alpha, 35kDa	BC002513	12803384	948
EIF2S2	8894	eukaryotic translation initiation factor 2, subunit 2 beta, 38kDa	BC000934	13111825	1002
EIF2S3	1968	eukaryotic translation initiation factor 2, subunit 3 gamma, 52kDa	BC019906	18044759	1419
EIF3S1	8669	eukaryotic translation initiation factor 3, subunit 1 alpha, 35kDa	BC002719	12803762	777
EIF3S2	8668	eukaryotic translation initiation factor 3, subunit 2 beta, 36kDa	BC000413	12653288	978
EIF3S4	8666	eukaryotic translation initiation factor 3, subunit 4 delta, 44kDa	BC000733	12653882	963
EIF3S5	8665	eukaryotic translation initiation factor 3, subunit 5 epsilon, 47kDa	BC000490	12653438	1074
EIF3S6	3646	eukaryotic translation initiation factor 3, subunit 6 48kDa	BC000734	12653884	1338
EIF3S6IP	51386	eukaryotic translation initiation factor 3, subunit 6 interacting protein	BC001101	12654534	1695
EIF3S7	8664	eukaryotic translation initiation factor 3, subunit 7 zeta, 66/67kDa	BC014912	15928892	1647
EIF3S8	8663	eukaryotic translation initiation factor 3, subunit 8, 110kDa	BC001571	16306764	2742
EIF3S9	8662	eukaryotic translation initiation factor 3, subunit 9 eta, 116kDa	BC001173	12654668	2445
EIF4A1	1973	eukaryotic translation initiation factor 4A, isoform 1	BC009585	16307019	1221
EIF4A2	1974	eukaryotic translation initiation factor 4A, isoform 2	BC013708	15489199	1224
EIF4E	1977	eukaryotic translation initiation factor 4E	BC012611	15214958	654
EIF4EBP1	1978	eukaryotic translation initiation factor 4E binding protein 1	BC004459	13325289	357
EIF4EBP2	1979	eukaryotic translation initiation factor 4E binding protein 2	BC005057	13477190	363
EIF4ENIF1	56478	eukaryotic translation initiation factor 4E nuclear import factor 1	BC033028	21542534	2958
EIF5	1983	eukaryotic translation initiation factor 5	BC007728	14043480	1296
EIF5A	1984	eukaryotic translation initiation factor 5A	BC000751	12653914	465
EIF5A2	56648	eukaryotic translation initiation factor 5A2	BC036072	23271285	462
ELA3A	10136	elastase 3A, pancreatic (protease E)	BC007028	13937847	813
ELAC1	55520	elaC homolog 1 (E. coli)	BC014624	15779119	1092
ELAVL1	1994	ELAV (embryonic lethal, abnormal vision, Drosophila)-like 1 (Hu antigen R)	BC003376	13097227	981
ELAVL2	1993	ELAV (embryonic lethal, abnormal vision, Drosophila)-like 2 (Hu antigen B)	BC030692	21265136	1041
ELF1	1997	E74-like factor 1 (ets domain transcription factor)	BC030507	34191107	1860
ELF2	1998	E74-like factor 2 (ets domain transcription factor)	BC034951	23273296	1602
ELF3	1999	E74-like factor 3 (ets domain transcription factor, epithelial-specific )	BC003569	13097734	1116
ELF4	2000	E74-like factor 4 (ets domain transcription factor)	BC017194	16877940	1992
ELF5	2001	E74-like factor 5 (ets domain transcription factor)	BC029743	20987254	768
ELK3	2004	ELK3, ETS-domain protein (SRF accessory protein 2)	BC017371	16924203	1224
ELL2	22936	elongation factor, RNA polymerase II, 2	BC028412	20306681	1923
ELMO3	79767	engulfment and cell motility 3 (ced-12 homolog, C. elegans)	BC034410	21706710	1824
ELOVL4	6785	elongation of very long chain fatty acids (FEN1/Elo2, SUR4/Elo3, yeast)-like 4	BC038506	23620502	945
ELP4	26610	elongation protein 4 homolog (S. cerevisiae)	BC012514	15214764	1608
EML1	2009	echinoderm microtubule associated protein like 1	BC033043	21542538	2448
EMP3	2014	epithelial membrane protein 3	BC009718	16307259	492
ENC1	8507	ectodermal-neural cortex (with BTB-like domain)	BC000418	12653298	1770
ENG	2022	endoglin (Osler-Rendu-Weber syndrome 1)	BC014271	15679935	1977
ENIGMA	9260	PDZ and LIM domain 7 (enigma)	BC001093	12654522	1374
ENO1	2023	enolase 1, (alpha)	BC011130	15029813	1305
ENO2	2026	enolase 2 (gamma, neuronal)	BC002745	12803810	1305
ENO3	2027	enolase 3 (beta, muscle)	BC017249	16878082	1305
ENPP2	5168	ectonucleotide pyrophosphatase/phosphodiesterase 2 (autotaxin)	BC034961	22137785	2592
ENPP4	22875	ectonucleotide pyrophosphatase/phosphodiesterase 4 (putative function)	BC018054	17390109	1362
ENTPD2	954	ectonucleoside triphosphate diphosphohydrolase 2	BC035738	23243470	1488
ENTPD6	955		BC025980.2	33991311	1452
EPAC	10411	Rap guanine nucleotide exchange factor (GEF) 3	BC017728	17389372	2646
EPB41	2035	erythrocyte membrane protein band 4.1 (elliptocytosis 1, RH-linked)	BC039079	24657822	2163
EPB41L1	2036	erythrocyte membrane protein band 4.1-like 1	BC040259	25955527	2643
EPB49	2039	erythrocyte membrane protein band 4.9 (dematin)	BC006318	13623436	1218
EPHA2	1969	EPH receptor A2	BC037166	33879863	2931
EPHX1	2052	epoxide hydrolase 1, microsomal (xenobiotic)	BC003567	13097728	1368
EPHX2	2053	epoxide hydrolase 2, cytoplasmic	BC007708	14043437	1668
EPS8R3	79574	EPS8-like 3	BC012926	15277845	1785
EPSTI1	94240	epithelial stromal interaction 1 (breast)	BC023660	33878618	1233
ERAF	51327	erythroid associated factor	BC035842	23272726	309
ERAL1	26284	Era G-protein-like 1 (E. coli)	BC019094	17512226	1314
ERCC1	2067	excision repair cross-complementing rodent repair deficiency, complementation group 1 (includes overlapping antisense sequence)	BC008930	14286265	894
ERCC3	2071	excision repair cross-complementing rodent repair deficiency, complementation group 3 (xeroderma pigmentosum group B complementing)	BC008820	14250705	2349
ERCC5	2073	excision repair cross-complementing rodent repair deficiency, complementation group 5 (xeroderma pigmentosum, complementation group G (Cockayne syndrome))	BC031522	34192346	3561
ERF	2077	Ets2 repressor factor	BC022231	18490807	1647
ERK8	225689	extracellular signal-regulated kinase 8	BC028034	20380831	834
ERP70	9601	protein disulfide isomerase-associated 4	BC000425	12653312	1938
ESAM	90952	endothelial cell adhesion molecule	BC016868	16877212	1173
ESDN	131566	discoidin, CUB and LCCL domain containing 2	BC029658	20988614	2232
ESRRBL1	55081	estrogen-related receptor beta like 1	BC011899	15080266	1290
ET	79157	hypothetical protein ET	BC002753	12803824	1350
ETEA	23197	expressed in T-cells and eosinophils in atopic dermatitis	BC014001	15559283	1254
ETF1	2107	eukaryotic translation termination factor 1	BC014269	15679931	1215
ETR101	9592	immediate early response 2	BC003625	13177684	672
ETS2	2114	v-ets erythroblastosis virus E26 oncogene homolog 2 (avian)	BC017040	16877577	1410
ETV3	2117	ets variant gene 3	BC022868	18605788	432
ETV4	2118	ets variant gene 4 (E1A enhancer binding protein, E1AF)	BC016623	16741644	1455
ETV5	2119	ets variant gene 5 (ets-related molecule)	BC007333	13938389	1533
EVER1	11322	epidermodysplasia verruciformis 1	BC023597	33879921	2418
EVI2A	2123	ecotropic viral integration site 2A	BC035572	23272679	699
EVI2B	2124	ecotropic viral integration site 2B	BC005926	13543535	1347
EVL	51466	Enah/Vasp-like	BC032358	21595331	1257
EWSR1	2130	Ewing sarcoma breakpoint region 1	BC004817	13435962	1971
EXO1	9156	exonuclease 1	BC007491	13960098	2541
EXT1	2131	exostoses (multiple) 1	BC001174	12654670	2241
EXTL3	2137	exostoses (multiple)-like 3	BC006363	13623512	2760
EZH2	2146	enhancer of zeste homolog 2 (Drosophila)	BC010858	14790028	2256
F11R	50848	F11 receptor	BC001533	16306711	900
F13A1	2162	coagulation factor XIII, A1 polypeptide	BC027963	20379734	2199
F2R	2149	coagulation factor II (thrombin) receptor	BC002464	12803296	1278
F2RL1	2150	coagulation factor II (thrombin) receptor-like 1	BC018130	17390291	1194
F3	2152	coagulation factor III (thromboplastin, tissue factor)	BC011029	15029642	888
F8A	8263	coagulation factor VIII-associated (intronic transcript) 1	BC039693	24981004	1116
FABP3	2170	fatty acid binding protein 3, muscle and heart (mammary-derived growth inhibitor)	BC007021	13937836	402
FABP5	2171	fatty acid binding protein 5 (psoriasis-associated)	BC019385	18043065	408
FABP7	2173	fatty acid binding protein 7, brain	BC012299	15126753	399
FACL4	2182	acyl-CoA synthetase long-chain family member 4	BC034959	23273826	2013
FACL5	51703	acyl-CoA synthetase long-chain family member 5	BC007985	14124925	2052
FADD	8772	Fas (TNFRSF6)-associated via death domain	BC000334	12653134	627
FADS1	3992	fatty acid desaturase 1	BC007846	14043779	1335
FADS3	3995	fatty acid desaturase 3	BC004901	13436175	1338
FAF1	11124	Fas (TNFRSF6) associated factor 1	BC004970	13436376	1953
FAIM	55179	Fas apoptotic inhibitory molecule	BC012478	15214689	540
FAM13C1	220965	family with sequence similarity 13, member C1	BC036453	22209064	1758
FANCC	2176	Fanconi anemia, complementation group C	BC015748	16041737	1677
FANCG	2189	Fanconi anemia, complementation group G	BC000032	12652578	1869
FAP	2191	fibroblast activation protein, alpha	BC026250	20072810	2283
FAPP2	84725	pleckstrin homology domain containing, family A (phosphoinositide binding specific) member 8	BC002838	12803978	1323
FARSL	2193	phenylalanine-tRNA synthetase-like, alpha subunit	BC006495	13676325	1527
FASTK	10922	FAST kinase	BC011770	15079970	1650
FATE	89885	fetal and adult testis expressed 1	BC022064	18314520	552
FAU	2197	Finkel-Biskis-Reilly murine sarcoma virus (FBR-MuSV) ubiquitously expressed (fox derived); ribosomal protein S30	BC033877	21708160	402
FBL	2091	fibrillarin	BC019260	17939434	966
FBLN1	2192	fibulin 1	BC022497	18490681	2052
FBXL2	25827	F-box and leucine-rich repeat protein 2	BC031556	21618735	1272
FBXL5	26234	F-box and leucine-rich repeat protein 5	BC030656	21040532	2076
FBXL8	55336	F-box and leucine-rich repeat protein 8	BC014414	15680141	1125
FBXL9	26231	leucine rich repeat containing 29	BC018785	17511877	672
FBXO2	26232	F-box protein 2	BC025233	19263633	891
FBXO26	115290	F-box protein 17	BC012385	15214526	837
FBXO5	26271	F-box protein 5	BC018905	17511910	1344
FBXO7	25793	F-box protein 7	BC008361	14249954	1569
FBXW1B	23291	F-box and WD-40 domain protein 11	BC026213	20070727	1590
FBXW2	26190	F-box and WD-40 domain protein 2	BC018738	17511773	1365
FCAR	2204	Fc fragment of IgA, receptor for	BC027953	20380792	864
FCER1A	2205	Fc fragment of IgE, high affinity I, receptor for; alpha polypeptide	BC005912	13543505	774
FCER1G	2207	Fc fragment of IgE, high affinity I, receptor for; gamma polypeptide	BC033872	21708095	264
FCER2	2208	Fc fragment of IgE, low affinity II, receptor for (CD23A)	BC014108	15559484	966
FCGR1A	2209	Fc fragment of IgG, high affinity Ia, receptor (CD64)	BC032634	21619685	1125
FCGR2A	2212	Fc fragment of IgG, low affinity IIa, receptor (CD32)	BC020823	18089163	951
FCGR2B	2213	Fc fragment of IgG, low affinity IIb, receptor (CD32)	BC031992	21618932	933
FCGRT	2217	Fc fragment of IgG, receptor, transporter, alpha	BC008734	14250560	1098
FCN1	2219	ficolin (collagen/fibrinogen domain containing) 1	BC020635	18088848	981
FCN3	8547	ficolin (collagen/fibrinogen domain containing) 3 (Hakata antigen)	BC020731	18088431	867
FCRH3	115352	Fc receptor-like protein 3	BC028933	20810035	2229
FDFT1	2222	farnesyl-diphosphate farnesyltransferase 1	BC003573	13097746	1254
FDPS	2224	farnesyl diphosphate synthase (farnesyl pyrophosphate synthetase, dimethylallyltranstransferase, geranyltranstransferase)	BC010004	14603060	1260
FEM1B	10116	fem-1 homolog b (C. elegans)	BC014558	17939625	1884
FEM1C	56929	fem-1 homolog c (C.elegans)	BC028369	22382065	1854
FEN1	2237	flap structure-specific endonuclease 1	BC000323	12653112	1143
FES	2242	feline sarcoma oncogene	BC035357	23271524	2469
FEZ1	9638	fasciculation and elongation protein zeta 1 (zygin I)	BC009545	16306950	1179
FEZL	55079	zinc finger protein 312	BC022464	18490674	1380
FGD2	221472	FYVE, RhoGEF and PH domain containing 2	BC023645	33878623	1968
FGF12	2257	fibroblast growth factor 12	BC022524	18490695	546
FGF13	2258	fibroblast growth factor 13	BC012347	15706433	738
FGF18	8817	fibroblast growth factor 18	BC006245	13623288	624
FGF19	9965	fibroblast growth factor 19	BC017664	17389210	651
FGF21	26291	fibroblast growth factor 21	BC018404	22450793	630
FGFR1	2260	fibroblast growth factor receptor 1 (fms-related tyrosine kinase 2, Pfeiffer syndrome)	BC018128	22450877	2463
FGFR4	2264	fibroblast growth factor receptor 4	BC011847	15080147	2409
FGFRL1	53834	fibroblast growth factor receptor-like 1	BC036769	22477841	1515
FH	2271	fumarate hydratase	BC003108	13111880	1533
FHIT	2272	fragile histidine triad gene	BC032336	21595363	444
FHL2	2274	four and a half LIM domains 2	BC014397	17939426	840
FHL3	2275	four and a half LIM domains 3	BC011697	15079779	843
FIBP	9158	fibroblast growth factor (acidic) intracellular binding protein	BC014388	15680107	1074
FKBP10	60681	FK506 binding protein 10, 65 kDa	BC016467	16741259	1749
FKBP11	51303	FK506 binding protein 11, 19 kDa	BC027973	20380806	606
FKBP14	55033	FK506 binding protein 14, 22 kDa	BC005206	13528809	636
FKBP1A	2280	FK506 binding protein 1A, 12kDa	BC005147	13477342	327
FKBP2	2286	FK506 binding protein 2, 13kDa	BC003384	13097251	429
FKBP3	2287	FK506 binding protein 3, 25kDa	BC016288	16740853	675
FKBP4	2288	FK506 binding protein 4, 59kDa	BC001786	12804710	1380
FKBP6	8468	FK506 binding protein 6, 36kDa	BC036817	22477286	984
FKBP8	23770	FK506 binding protein 8, 38kDa	BC009966	14602949	1068
FKBPL	63943	FK506 binding protein like	BC011966	15080434	1050
FKHL18	2307	forkhead-like 18 (Drosophila)	BC013408	15426573	993
FKRP	79147	fukutin related protein	BC002612	12803560	1488
FKSG14	64105	leucine zipper protein FKSG14	BC005400	13529292	810
FKSG28	81621	Kazal-type serine protease inhibitor domain 1	BC007758	14043549	915
FKSG32	83480	pseudouridylate synthase 3	BC004822	14919398	1446
FLI1	2313	Friend leukemia virus integration 1	BC001670	12804518	1359
FLII	2314	flightless I homolog (Drosophila)	BC025300	19263699	3810
FLIPT1	55356	solute carrier family 22 (organic cation transporter), member 15	BC026358	20071161	1608
FLJ10713	55211	developmental pluripotency associated 4	BC032846	23271562	885
FLJ11210	55326		BC023550.2	33879276	1095
FLJ11222	55329	meiosis-specific nuclear structural protein 1	BC034991	23271207	1488
FLJ12089	79603	LAG1 longevity assurance homolog 4 (S. cerevisiae)	BC009828	14602620	1185
FLJ12132	80045	G protein-coupled receptor 157	BC018691	17391504	468
FLJ12229	79934	aarF domain containing kinase 4	BC027473	20071711	1512
FLJ12552	64854	ubiquitin specific protease 46	BC037574	22902224	1101
FLJ12890	25904	CCR4-NOT transcription complex, subunit 10	BC002931	12804152	2235
FLJ13055	64748	lipid phosphate phosphatase-related protein type 2	BC009378	14424724	1032
FLJ13187	79666		BC011806.1	15080048	750
FLJ13204	79817	MOB1, Mps One Binder kinase activator-like 2B (yeast)	BC033027	21542523	651
FLJ13902	79706	PRKR interacting protein 1 (IL11 inducible)	BC014298	15679979	555
FLJ14440	84870	thrombospondin, type I, domain containing 2	BC022367	18490856	819
FLJ14511	85365	asparagine-linked glycosylation 2 homolog (yeast, alpha-1,3-mannosyltransferase)	BC017876	17389714	1251
FLJ14751	84920	asparagine-linked glycosylation 10 homolog (yeast, alpha-1,2-glucosyltransferase)	BC033730	21707441	1422
FLJ20190	54852	membrane progestin receptor gamma	BC039234	24657740	993
FLJ20456	54941	ring finger protein 125	BC012021	15080561	699
FLJ20624	55003	PAK1 interacting protein 1	BC010907	15012023	1179
FLJ20974	84153	AYP1 protein	BC023588	33874513	495
FLJ22055	79837	phosphatidylinositol-4-phosphate 5-kinase, type II, gamma	BC028596	20306909	1266
FLJ22060	79665	DEAH (Asp-Glu-Ala-His) box polypeptide 40	BC024187	18848215	2340
FLJ22940	79622	chromosome 16 open reading frame 33	BC001381	12655062	399
FLJ23392	79842	zinc finger and BTB domain containing 3	BC025249	19263647	1725
FLJ25785	91252	solute carrier family 39 (zinc transporter), member 13	BC019016	17512076	1095
FLJ31819	151556	G protein-coupled receptor 155	BC028730	22382235	2613
FLJ35207	120071	glycosyltransferase-like 1B	BC037291	22713409	2166
FLJ35713	199720	gametogenetin	BC035008	23271255	1959
FLN29	10906	FLN29 gene product	BC003553	13097686	1749
FLOT1	10211	flotillin 1	BC001146	12654618	1284
FLOT2	2319	flotillin 2	BC017292	16878172	1140
FLRT3	23767	fibronectin leucine rich transmembrane protein 3	BC020870	18088787	1950
FMO2	2327	flavin containing monooxygenase 2	BC005894	13543471	1416
FMO3	2328	flavin containing monooxygenase 3	BC032016	21594873	1599
FMO4	2329	flavin containing monooxygenase 4	BC002780	12803872	1677
FMOD	2331	fibromodulin	BC035281	23271347	1131
FNTB	2342	farnesyltransferase, CAAX box, beta	BC020232	18044238	1314
FOLH1	2346	folate hydrolase (prostate-specific membrane antigen) 1	BC025672	19343603	2160
FOLR1	2348	folate receptor 1 (adult)	BC002947	12804178	774
FOP	11116	FGFR1 oncogene partner	BC011902	15080275	1140
FOS	2353		BC004490.1	13325363	1143
FOSL1	8061	FOS-like antigen 1	BC016648	16741703	816
FOSL2	2355		BC022791.1	18605531	981
FOXA2	3170	forkhead box A2	BC011780	15079990	1374
FOXO1A	2308	forkhead box O1A (rhabdomyosarcoma)	BC021981	18314374	1968
FPRL1	2358	formyl peptide receptor-like 1	BC029125	34783251	1056
FRAT2	23401	frequently rearranged in advanced T-cell lymphomas 2	BC020165	18042885	702
FRCP1	64838	fibronectin type III domain containing 4	BC032725	21619680	705
FREB	84824	Fc receptor homolog expressed in B cells	BC006521	13676371	1080
FRK	2444	fyn-related kinase	BC012916	15277743	1518
FRZB	2487	frizzled-related protein	BC027855	20380750	978
FSCN1	6624	fascin homolog 1, actin-bundling protein (Strongylocentrotus purpuratus)	BC000521	12653498	1482
FSCN3	29999	fascin homolog 3, actin-bundling protein, testicular (Strongylocentrotus purpuratus)	BC035606	23274182	1497
FSD1	79187	fibronectin type III and SPRY domain containing 1	BC003124	13111906	1491
FST	10468		BC004107.1	13278647	1035
FTH1	2495	ferritin, heavy polypeptide 1	BC000857	12654092	552
FTL	2512	ferritin, light polypeptide	BC004245	13279004	528
FTSJ3	117246	FtsJ homolog 3 (E. coli)	BC036710	23331071	2544
FUBP1	8880	far upstream element (FUSE) binding protein 1	BC017247	16878076	1962
FUK	197258	fucokinase	BC032542	21618525	2973
FUS	2521	fusion (involved in t(12;16) in malignant liposarcoma)	BC000402	12653266	1581
FUT9	10690	fucosyltransferase 9 (alpha (1,3) fucosyltransferase)	BC036101	23273584	1080
FXYD1	5348	FXYD domain containing ion transport regulator 1 (phospholemman)	BC032800	34783436	279
FXYD2	486	FXYD domain containing ion transport regulator 2	BC013289	15342033	201
FXYD5	53827	FXYD domain containing ion transport regulator 5	BC009642	16307107	537
FXYD6	53826	FXYD domain containing ion transport regulator 6	BC018652	17391437	288
FXYD7	53822	FXYD domain containing ion transport regulator 7	BC018619	17391356	243
FY	2532	Duffy blood group	BC017817	17389573	1011
FZD9	8326	frizzled homolog 9 (Drosophila)	BC026333	20072870	1776
FZR1	51343	fizzy/cell division cycle 20 related 1 (Drosophila)	BC013413	15426580	1482
G0S2	50486	putative lymphocyte G0/G1 switch gene	BC009694	16307210	312
G1P2	9636	interferon, alpha-inducible protein (clone IFI-15K)	BC009507	14550513	498
G3BP	10146	Ras-GTPase-activating protein SH3-domain-binding protein	BC006997	13937793	1401
G6PD	2539	glucose-6-phosphate dehydrogenase	BC000337	12653140	1548
G6PT1	2542	solute carrier family 37 (glycerol-6-phosphate transporter), member 4	BC003589	13097788	1290
GABARAPL1	23710	GABA(A) receptor-associated protein like 1	BC009309	14424561	354
GABARAPL2	11345	GABA(A) receptor-associated protein-like 2	BC005985	13543671	354
GABPB2	2553	GA binding protein transcription factor, beta subunit 2, 47kDa	BC036080	23273576	1152
GABRA1	2554	gamma-aminobutyric acid (GABA) A receptor, alpha 1	BC030696	21265167	1371
GABRA3	2556	gamma-aminobutyric acid (GABA) A receptor, alpha 3	BC028629	20306951	1479
GABRA4	2557	gamma-aminobutyric acid (GABA) A receptor, alpha 4	BC035055	23272310	1665
GABRA5	2558	gamma-aminobutyric acid (GABA) A receptor, alpha 5	BC011403	15030265	1389
GABRB1	2560	gamma-aminobutyric acid (GABA) A receptor, beta 1	BC022449	18490266	1425
GABRB3	2562	gamma-aminobutyric acid (GABA) A receptor, beta 3	BC010641	14714964	1422
GABRD	2563	gamma-aminobutyric acid (GABA) A receptor, delta	BC033801	21707469	1359
GABRG1	2565	gamma-aminobutyric acid (GABA) A receptor, gamma 1	BC031087	21411385	1398
GAC1	10446	leucine rich repeat neuronal 5	BC034047	21706505	2142
GAD1	2571	glutamate decarboxylase 1 (brain, 67kDa)	BC026349	20071155	1785
GADD45A	1647	growth arrest and DNA-damage-inducible, alpha	BC011757	15079933	498
GAGE1	2543	G antigen 1	BC036094	23273582	420
GAGE5	2577	G antigen 5	BC031628	21619469	354
GAGEB1	8712		BC004861.1	13436067	441
GAGEC1	9506	P antigen family, member 4 (prostate associated)	BC010897	15012004	309
GAGED3	9502	X antigen family, member 2	BC009232	14328031	336
GAJ	84057	GAJ protein	BC032142	21594675	618
GALC	2581	galactosylceramidase (Krabbe disease)	BC036518	22328078	2010
GALE	2582	UDP-galactose-4-epimerase	BC001273	12654858	1047
GALK1	2584	galactokinase 1	BC001166	12654656	1179
GALK2	2585	galactokinase 2	BC005141	13477332	1377
GALNACT-2	55454	chondroitin sulfate GalNAcT-2	BC030268	20988437	1629
GALNT4	8693	UDP-N-acetyl-alpha-D-galactosamine:polypeptide N-acetylgalactosaminyltransferase 4 (GalNAc-T4)	BC036390	22137797	1737
GALNT6	11226	UDP-N-acetyl-alpha-D-galactosamine:polypeptide N-acetylgalactosaminyltransferase 6 (GalNAc-T6)	BC035822	23274203	1869
GALNT7	117248	UDP-N-acetyl-alpha-D-galactosamine:polypeptide N-acetylgalactosaminyltransferase-like 2	BC014789	15928641	1920
GAP43	2596	growth associated protein 43	BC007936	14044009	717
GAPD	2597	glyceraldehyde-3-phosphate dehydrogenase	BC009081	14290602	1008
GAPDS	26330	glyceraldehyde-3-phosphate dehydrogenase, spermatogenic	BC036373	22137783	1227
GARS	2617	glycyl-tRNA synthetase	BC007755	14043543	2220
GAS7	8522	growth arrest-specific 7	BC001152	12654630	1239
GATA2	2624	GATA binding protein 2	BC002557	12803464	1443
GBAS	2631	glioblastoma amplified sequence	BC000732	12653880	861
GBE1	2632	glucan (1,4-alpha-), branching enzyme 1 (glycogen branching enzyme, Andersen disease, glycogen storage disease type IV)	BC012098	15082370	2109
GBL	64223	G protein beta subunit-like	BC020499	18088122	984
GBP1	2633	guanylate binding protein 1, interferon-inducible, 67kDa	BC002666	12803662	1779
GBP5	115362	guanylate binding protein 5	BC031639	22749706	1761
GCG	2641	glucagon	BC005278	13528971	543
GCH1	2643	GTP cyclohydrolase 1 (dopa-responsive dystonia)	BC025415	33879404	753
GCK	2645	glucokinase (hexokinase 4, maturity onset diabetes of the young 2)	BC001890	12804882	1398
GCPHLP	132954	phosducin-like 2	BC034431	21706734	753
GDBR1	10422	ubiquitin associated domain containing 1	BC004967	13436367	1218
GDEP	118425	gene differentially expressed in prostate	BC020934	18088729	180
GDF1	2657	growth differentiation factor 1	BC022450	18490662	1014
GDF3	9573	growth differentiation factor 3	BC030959	21410191	1095
GDI1	2664	GDP dissociation inhibitor 1	BC012201	15126543	1344
GDI2	2665	GDP dissociation inhibitor 2	BC005145	13477338	1338
GEM	2669	GTP binding protein overexpressed in skeletal muscle	BC022010	18314424	891
GENX-3414	8987	genethonin 1	BC022301	18490158	1077
GFI1	2672	growth factor independent 1	BC032751	21618435	1269
GFPT2	9945	glutamine-fructose-6-phosphate transaminase 2	BC000012	12652544	2049
GFRA1	2674	GDNF family receptor alpha 1	BC014962	15929001	1383
GFRA3	2676	GDNF family receptor alpha 3	BC037951	23274188	1203
GGA2	23062	golgi associated, gamma adaptin ear containing, ARF binding protein 2	BC000284	12653040	1842
GGCX	2677	gamma-glutamyl carboxylase	BC013979	15559247	2277
GGT1	2678		BC025927.1	19684049	1710
GGTLA1	2687	gamma-glutamyltransferase-like activity 1	BC011362	15030207	1761
GHRL	51738	ghrelin precursor	BC025791	19343837	354
GIF	2694	gastric intrinsic factor (vitamin B synthesis)	BC037958	23958688	1254
GIOT-1	92283	gonadotropin inducible transcription repressor 1	BC028631	20306350	1311
GJA1	2697	gap junction protein, alpha 1, 43kDa (connexin 43)	BC026329	20072865	1149
GJA4	2701	gap junction protein, alpha 4, 37kDa (connexin 37)	BC027889	20381259	1002
GJA5	2702	gap junction protein, alpha 5, 40kDa (connexin 40)	BC013313	15426425	1077
GJB1	2705	gap junction protein, beta 1, 32kDa (connexin 32, Charcot-Marie-Tooth neuropathy, X-linked)	BC002805	12803916	852
GJB2	2706	gap junction protein, beta 2, 26kDa (connexin 26)	BC017048	16877591	681
GJB4	127534	gap junction protein, beta 4 (connexin 30.3)	BC034709	21961203	801
GK	2710	glycerol kinase	BC037549	23337049	1575
GK001	57003	GK001 protein	BC008905	14286217	1452
GK003	57002	chromosome 7 open reading frame 36	BC022043	18314449	681
GK2	2712	glycerol kinase 2	BC029820	20987489	1662
GKAP42	80318	G kinase anchoring protein 1	BC014476	15680242	1101
GL009	84522	jagunal homolog 1 (Drosophila)	BC032101	33874712	552
GL012	81571	chromosome 9 open reading frame 45	BC034918	22028247	504
GLA	2717	galactosidase, alpha	BC002689	12803706	1290
GLB1	2720	galactosidase, beta 1	BC007493	13960103	2034
GLE1L	2733	GLE1 RNA export mediator-like (yeast)	BC030012	20987287	2097
GLI4	2738	GLI-Kruppel family member GLI4	BC014165	15559607	1131
GLRA3	8001	glycine receptor, alpha 3	BC036086	23241722	1395
GLRB	2743	glycine receptor, beta	BC032635	21619164	1494
GLRX	2745	glutaredoxin (thioltransferase)	BC005304	13529037	321
GLTSCR2	29997	glioma tumor suppressor candidate region gene 2	BC006311	13623422	1437
GLUL	2752	glutamate-ammonia ligase (glutamine synthase)	BC010037	14603140	1122
GLYAT	10249	glycine-N-acyltransferase	BC009785	14602548	492
gm117	148423	chromosome 1 open reading frame 52	BC029538	20810298	549
GM2A	2760	GM2 ganglioside activator	BC009273	14424506	582
GMCL	64396	germ cell-less homolog 1 (Drosophila)-like	BC024184	18848303	1581
GMDS	2762	GDP-mannose 4,6-dehydratase	BC000117	12652734	1119
GMPPA	29926	GDP-mannose pyrophosphorylase A	BC007456	13938606	1263
GMPS	8833	guanine monphosphate synthetase	BC012178	15082534	2082
GNA13	10672	guanine nucleotide binding protein (G protein), alpha 13	BC036756	22478059	1134
GNA14	9630	guanine nucleotide binding protein (G protein), alpha 14	BC027886	24081078	1068
GNAI1	2770	guanine nucleotide binding protein (G protein), alpha inhibiting activity polypeptide 1	BC026326	20072862	1065
GNAI2	2771	guanine nucleotide binding protein (G protein), alpha inhibiting activity polypeptide 2	BC014627	15779125	1068
GNAI3	2773	guanine nucleotide binding protein (G protein), alpha inhibiting activity polypeptide 3	BC025285	19264134	1065
GNAT2	2780	guanine nucleotide binding protein (G protein), alpha transducing activity polypeptide 2	BC000233	12652948	1065
GNAZ	2781	guanine nucleotide binding protein (G protein), alpha z polypeptide	BC026342	22382164	1068
GNB2L1	10399	guanine nucleotide binding protein (G protein), beta polypeptide 2-like 1	BC000366	12653196	954
GNB3	2784	guanine nucleotide binding protein (G protein), beta polypeptide 3	BC002454	12803276	1023
GNG10	2790	guanine nucleotide binding protein (G protein), gamma 10	BC015391	15929933	462
GNG11	2791	guanine nucleotide binding protein (G protein), gamma 11	BC009709	16307238	222
GNG3	2785	guanine nucleotide binding protein (G protein), gamma 3	BC015563	15990403	228
GNGT1	2792	guanine nucleotide binding protein (G protein), gamma transducing activity polypeptide 1	BC029367	20810426	225
GNL1	2794	guanine nucleotide binding protein-like 1	BC018366	22450778	1824
GNLY	10578	granulysin	BC023576	23270801	438
GNMT	27232	glycine N-methyltransferase	BC032627	21619157	888
GOLGA1	2800	golgi autoantigen, golgin subfamily a, 1	BC032853	23271228	2304
GORASP2	26003	golgi reassembly stacking protein 2, 55kDa	BC007770	14043582	1359
GOSR2	9570	golgi SNAP receptor complex member 2	BC009710	16307240	639
GOT2	2806	glutamic-oxaloacetic transaminase 2, mitochondrial (aspartate aminotransferase 2)	BC000525	12653506	1293
GP1BA	2811	glycoprotein Ib (platelet), alpha polypeptide	BC027955	20379780	1881
GP9	2815	glycoprotein IX (platelet)	BC030229	20988413	534
GPAA1	8733	GPAA1P anchor attachment protein 1 homolog (yeast)	BC004129	13278695	1866
GPBAR1	151306	G protein-coupled bile acid receptor 1	BC033625	21706912	993
GPC3	2719	glypican 3	BC035972	23271173	1743
GPC4	2239	glypican 4	BC017166	23398481	1671
GPCR1	26996	G protein-coupled receptor 160	BC000181	13111815	1017
GPD1	2819	glycerol-3-phosphate dehydrogenase 1 (soluble)	BC032234	21594876	1050
GPHN	10243	gephyrin	BC030016	20988628	2310
GPI	2821	glucose phosphate isomerase	BC004982	13436412	1677
GPM6A	2823	glycoprotein M6A	BC022528	18490699	837
GPM6B	2824	glycoprotein M6B	BC008151	14198184	798
GPNMB	10457	glycoprotein (transmembrane) nmb	BC032783	21619752	1719
GPR114	221188	G protein-coupled receptor 114	BC032401	22749620	1587
GPR17	2840	G protein-coupled receptor 17	BC031653	21594965	1020
GPR24	2847	G protein-coupled receptor 24	BC021146	18088973	1269
GPR3	2827	G protein-coupled receptor 3	BC032702	21618432	993
GPR30	2852	G protein-coupled receptor 30	BC011634	15079632	1128
GPR34	2857	G protein-coupled receptor 34	BC020678	18088371	1146
GPR41	2865	G protein-coupled receptor 41	BC035657	23272748	1041
GPR48	55366	leucine-rich repeat-containing G protein-coupled receptor 4	BC033039	21542531	2784
GPR51	9568	G protein-coupled receptor 51	BC035071	23272433	2643
GPR55	9290	G protein-coupled receptor 55	BC032694	21595841	960
GPR62	118442	G protein-coupled receptor 62	BC026357	20070982	1107
GPR65	8477	G protein-coupled receptor 65	BC035633	23243459	1014
GPR84	53831	G protein-coupled receptor 84	BC020614	18089044	1191
GPR91	56670	succinate receptor 1	BC030948	21410927	993
GPR92	57121	G protein-coupled receptor 92	BC033571	33879770	1119
GPRC5B	51704	G protein-coupled receptor, family C, group 5, member B	BC034467	21759766	1212
GPRC5C	55890	G protein-coupled receptor, family C, group 5, member C	BC016860	16877192	1326
GPSN2	9524	glycoprotein, synaptic 2	BC002425	12803228	927
GPT	2875	glutamic-pyruvate transaminase (alanine aminotransferase)	BC018207	17390464	1491
GPX7	2882	glutathione peroxidase 7	BC032788	21595678	564
GRAP2	9402	GRB2-related adaptor protein 2	BC026002	19683954	993
GRB10	2887	growth factor receptor-bound protein 10	BC024285	18999461	1611
GRB2	2885	growth factor receptor-bound protein 2	BC000631	12653692	654
GRB7	2886	growth factor receptor-bound protein 7	BC006535	16306815	1599
GRIA2	2891	glutamate receptor, ionotropic, AMPA 2	BC010574	14714845	2652
GRINL1A	81488	glutamate receptor, ionotropic, N-methyl D-aspartate-like 1A	BC001510	16306672	1107
GRIPAP1	56850	GRIP1 associated protein 1	BC001522	16306695	1455
GRM3	2913	glutamate receptor, metabotropic 3	BC022496	18490393	2634
GRN	2896	granulin	BC010577	34784982	1782
GRP	2922	gastrin-releasing peptide	BC004488	13325357	447
GRP58	2923	protein disulfide isomerase-associated 3	BC014433	15680172	1518
GRWD	83743	glutamate-rich WD repeat containing 1	BC002440	12803252	1341
GSG1	83445	germ cell associated 1	BC033854	21707285	972
GSK3A	2931	glycogen synthase kinase 3 alpha	BC027984	20380194	1452
GSK3B	2932	glycogen synthase kinase 3 beta	BC000251	12652980	1302
GSN	2934	gelsolin (amyloidosis, Finnish type)	BC026033	19684180	2349
GSS	2937	glutathione synthetase	BC007927	14043990	1425
GSTA2	2939	glutathione S-transferase A2	BC002895	12804084	669
GSTA3	2940	glutathione S-transferase A3	BC020619	18089047	669
GSTA4	2941	glutathione S-transferase A4	BC015523	15930180	669
GSTM3	2947	glutathione S-transferase M3 (brain)	BC000088	12652678	678
GSTM4	2948	glutathione S-transferase M4	BC015513	15930152	657
GSTP1	2950	glutathione S-transferase pi	BC010915	15012035	633
GSTT1	2952	glutathione S-transferase theta 1	BC007065	13937910	723
GSTT2	2953	glutathione S-transferase theta 2	BC002415	12803214	735
GTF2A2	2958	general transcription factor IIA, 2, 12kDa	BC000287	12653046	330
GTF2F1	2962	general transcription factor IIF, polypeptide 1, 74kDa	BC000120	12652738	1554
GTF2H1	2965	general transcription factor IIH, polypeptide 1, 62kDa	BC000365	12653194	1647
GTF2H4	2968	general transcription factor IIH, polypeptide 4, 52kDa	BC004935	13436277	1389
GTF2IRD1	9569	GTF2I repeat domain containing 1	BC018136	17390302	2880
GTF3C2	2976	general transcription factor IIIC, polypeptide 2, beta 110kDa	BC020981	18088104	2736
GTF3C5	9328	general transcription factor IIIC, polypeptide 5, 63kDa	BC011355	15030195	1560
GTPBG3	84705	GTP binding protein 3 (mitochondrial)	BC019261	17939530	1479
GTR2	64121	Ras-related GTP binding C	BC016668	16741747	1200
GTSE1	51512	G-2 and S-phase expressed 1	BC006325	13623450	2163
GU2	79009	DEAD (Asp-Glu-Ala-Asp) box polypeptide 50	BC000272	12653020	2214
GUCA1A	2978	guanylate cyclase activator 1A (retina)	BC031663	22749775	606
GUSB	2990	glucuronidase, beta	BC014142	15559559	1956
GYG2	8908	glycogenin 2	BC023152	18605502	1413
GYPA	2993	glycophorin A (includes MN blood group)	BC005319	13529076	453
GYPE	2996	glycophorin E	BC017864	17389684	237
GZMA	3001	granzyme A (granzyme 1, cytotoxic T-lymphocyte-associated serine esterase 3)	BC015739	16041722	789
GZMB	3002	granzyme B (granzyme 2, cytotoxic T-lymphocyte-associated serine esterase 1)	BC030195	20988817	744
GZMH	2999	granzyme H (cathepsin G-like 2, protein h-CCPX)	BC027974	20381277	741
GZMK	3003	granzyme K (serine protease, granzyme 3; tryptase II)	BC035802	23242916	795
H105E3	50814	NAD(P) dependent steroid dehydrogenase-like	BC000245	12652968	1122
H11	26353	heat shock 22kDa protein 8	BC002673	12803674	591
H1F0	3005	H1 histone family, member 0	BC000145	12652786	585
H2AFZ	3015	H2A histone family, member Z	BC018002	17389987	387
H2AV	94239	H2A histone family, member V	BC014885	15928846	387
H3F3A	3020	H3 histone, family 3A	BC029405	20810209	411
H963	29909	G protein-coupled receptor 171	BC036815	23274211	960
HAAO	23498	3-hydroxyanthranilate 3,4-dioxygenase	BC029510	20810279	861
HABP2	3026	hyaluronan binding protein 2	BC031412	21618648	1683
HADHA	3030	hydroxyacyl-Coenzyme A dehydrogenase/3-ketoacyl-Coenzyme A thiolase/enoyl-Coenzyme A hydratase (trifunctional protein), alpha subunit	BC009235	14328040	2292
HADHB	3032	hydroxyacyl-Coenzyme A dehydrogenase/3-ketoacyl-Coenzyme A thiolase/enoyl-Coenzyme A hydratase (trifunctional protein), beta subunit	BC017564	17068369	1428
HADHSC	3033	L-3-hydroxyacyl-Coenzyme A dehydrogenase, short chain	BC000306	12653080	945
HAGH	3029	hydroxyacylglutathione hydrolase	BC000840	12654064	783
HAN11	10238	WD-repeat protein	BC001264	12654840	1029
HAO2	51179	hydroxyacid oxidase 2 (long chain)	BC020863	18089186	1056
HARSL	23438	histidyl-tRNA synthetase-like	BC007680	14043375	1521
HAS1	3036	hyaluronan synthase 1	BC035837	23243101	1734
HAVCR1	26762	hepatitis A virus cellular receptor 1	BC013325	15426446	1095
HBA2	3040	hemoglobin, alpha 2	BC008572	14250290	429
HBB	3043	hemoglobin, beta	BC007075	13937928	444
HBE1	3046	hemoglobin, epsilon 1	BC015537	15930211	444
HBG1	3047	hemoglobin, gamma A	BC010914	15012033	444
HBOA	11143	MYST histone acetyltransferase 2	BC032640	34192361	1836
HBP1	26959	HMG-box transcription factor 1	BC017069	16877649	1545
HBZ	3050	hemoglobin, zeta	BC027892	20379745	429
HCA66	55813	hepatocellular carcinoma-associated antigen 66	BC035325	23241738	1794
HCC8	51542	vacuolar protein sorting 54 (yeast)	BC030275	20987716	2898
HCLS1	3059	hematopoietic cell-specific Lyn substrate 1	BC016758	16876968	1461
HCNP	56949	XPA binding protein 2	BC007208	13938178	2568
HDAC1	3065	histone deacetylase 1	BC000301	12653070	1449
HDAC2	3066	histone deacetylase 2	BC031055	21411358	1467
HDAC3	8841	histone deacetylase 3	BC000614	12653662	1287
HDGF	3068		BC018991.1	17512034	723
HDLBP	3069	high density lipoprotein binding protein (vigilin)	BC001179	12654680	3807
HEBP1	50865	heme binding protein 1	BC016277	16740826	570
HEC	10403	kinetochore associated 2	BC035617	23274184	1929
HEMK	51409	HemK methyltransferase family member 1	BC000781	12653970	1017
HEPH	9843	hephaestin	BC011561	15079444	3477
HERPUD1	9709	homocysteine-inducible, endoplasmic reticulum stress-inducible, ubiquitin-like domain member 1	BC000086	12652674	1176
HES1	3280	hairy and enhancer of split 1, (Drosophila)	BC039152	24657599	834
Hes4	57801	hairy and enhancer of split 4 (Drosophila)	BC012351	15214448	666
HEXA	3073	hexosaminidase A (alpha polypeptide)	BC018927	17511940	1590
HEXB	3074	hexosaminidase B (beta polypeptide)	BC017378	16924216	1671
HFL1	3078	complement factor H-related 1	BC016755	16876960	993
HFL3	3080	complement factor H-related 2	BC022283	18490826	813
HGRG8	51441	YTH domain family, member 2	BC002559	12803468	1740
HGS	9146	hepatocyte growth factor-regulated tyrosine kinase substrate	BC003565	13097722	2334
HHIP	64399	hedgehog interacting protein	BC025311	22137534	2103
HHLA2	11148	HERV-H LTR-associating 2	BC035971	23272002	1245
hIAN7	168537	GTPase, IMAP family member 7	BC027613	20379664	903
HIBADH	11112	3-hydroxyisobutyrate dehydrogenase	BC032324	21619590	1011
HIF1AN	55662	hypoxia-inducible factor 1, alpha subunit inhibitor	BC007719	14043455	1050
HINT3	135114	histidine triad nucleotide binding protein 3	BC015732	16041712	549
HIS1	10614	HMBA-inducible	BC006460	13623668	1080
HIST1H2AG	8969	histone 1, H2ag	BC016677	16741767	393
HIST1H2AM	8336	histone 1, H2am	BC032756	21595675	393
HIST1H2BN	8341	histone 1, H2bn	BC011372	15030223	501
HIST1H3D	8351	histone 1, H3d	BC031333	21411167	411
HIST1H4F	8361	histone 1, H4f	BC017361	16878338	312
HIST1H4H	8365	histone 1, H4h	BC010926	15012054	312
HIWI2	143689	piwi-like 4 (Drosophila)	BC031060	21410560	2559
HK1	3098	hexokinase 1	BC008730	14250553	2754
HK2	3099	hexokinase 2	BC021116	18088967	2754
HK3	3101	hexokinase 3 (white cell)	BC028129	20380887	2772
HKE4	7922	solute carrier family 39 (zinc transporter), member 7	BC000645	12653720	1410
HKR3	3104	GLI-Kruppel family member HKR3	BC013573	15488885	2067
HLA-A	3105	major histocompatibility complex, class I, A	BC008611	14250358	1098
HLA-C	3107	major histocompatibility complex, class I, C	BC002463	12803294	1101
HLA-DMA	3108	major histocompatibility complex, class II, DM alpha	BC011447	15030335	786
HLA-DMB	3109	major histocompatibility complex, class II, DM beta	BC027175	20073044	792
HLA-DOA	3111	major histocompatibility complex, class II, DO alpha	BC013183	15341972	753
HLA-DPA1	3113	major histocompatibility complex, class II, DP alpha 1	BC009956	14602922	783
HLA-DPB1	3115	major histocompatibility complex, class II, DP beta 1	BC013184	15341974	777
HLA-DQA1	3117	major histocompatibility complex, class II, DQ alpha 1	BC008585	14250310	765
HLA-DQB1	3119	major histocompatibility complex, class II, DQ beta 1	BC012106	15082384	786
HLA-DRA	3122	major histocompatibility complex, class II, DR alpha	BC032350	21619051	765
HLA-E	3133	major histocompatibility complex, class I, E	BC002578	12803502	1077
HLA-G	3135	HLA-G histocompatibility antigen, class I, G	BC021708	18203846	1017
HLX1	3142	H2.0-like homeo box 1 (Drosophila)	BC007294	13938328	1467
HM13	81502	histocompatibility (minor) 13	BC008938	14286279	1134
HMCS	55034	molybdenum cofactor sulfurase	BC012079	15082341	2667
HMGA1	3159	high mobility group AT-hook 1	BC008832	14250725	324
HMGB2	3148	high-mobility group box 2	BC001063	12654470	630
HMGCL	3155	3-hydroxymethyl-3-methylglutaryl-Coenzyme A lyase (hydroxymethylglutaricaciduria)	BC010570	14714838	978
HMGCR	3156	3-hydroxy-3-methylglutaryl-Coenzyme A reductase	BC033692	21707181	2508
HMGE	80273	GrpE-like 1, mitochondrial (E. coli)	BC024242	18999488	654
HMGN1	3150	high-mobility group nucleosome binding domain 1	BC000075	12652654	303
HMOX1	3162	heme oxygenase (decycling) 1	BC001491	16306630	867
HMT-1	56052	asparagine-linked glycosylation 1 homolog (yeast, beta-1,4-mannosyltransferase)	BC004402	13325167	1395
HN1	51155	hematological and neurological expressed 1	BC001420	12655134	465
HNMT	3176	histamine N-methyltransferase	BC020677	18089084	879
HNOEL-iso	56944	olfactomedin-like 3	BC009920	14602834	1221
HNRPD	3184	heterogeneous nuclear ribonucleoprotein D (AU-rich element RNA binding protein 1, 37kDa)	BC002401	12803190	1068
HNRPDL	9987	heterogeneous nuclear ribonucleoprotein D-like	BC011714	15079821	1263
HNRPF	3185	heterogeneous nuclear ribonucleoprotein F	BC001432	12655154	1248
HNRPH1	3187	heterogeneous nuclear ribonucleoprotein H1 (H)	BC001348	12655000	1350
HNRPK	3190	heterogeneous nuclear ribonucleoprotein K	BC000355	12653174	1395
HNRPR	10236	heterogeneous nuclear ribonucleoprotein R	BC001449	12655184	1911
HNRPU	3192	heterogeneous nuclear ribonucleoprotein U (scaffold attachment factor A)	BC003367	13097200	2421
HOMER1	9456	homer homolog 1 (Drosophila)	BC015502	15930121	1065
HOMER2	9455	homer homolog 2 (Drosophila)	BC012109	15082390	1032
HOMER3	9454	homer homolog 3 (Drosophila)	BC012113	15082396	1086
HOOK1	51361	hook homolog 1 (Drosophila)	BC011621	15079604	2187
HOOK2	29911	hook homolog 2 (Drosophila)	BC012443	15214632	2154
HOP	84525	homeodomain-only protein	BC014225	15559741	222
HOXA1	3198	homeo box A1	BC032547	34191750	1008
HOXA10	3206	homeo box A10	BC013971	15559234	1182
HOXA3	3200	homeo box A3	BC015180	15929499	1332
HOXA5	3202	homeo box A5	BC013682	15489146	813
HOXA9	3205	homeo box A9	BC006537	16306818	819
HOXB13	10481	homeo box B13	BC007092	13937957	855
HOXB6	3216	homeo box B6	BC014651	15779174	675
HOXB7	3217	homeo box B7	BC015345	15929846	654
HOXD1	3231	homeo box D1	BC014477	15680244	987
HOXD3	3232	homeo box D3	BC005124	13477300	1299
HPCAL4	51440	hippocalcin like 4	BC030827	21410083	576
HPCL2	26061	2-hydroxyphytanoyl-CoA lyase	BC001627	12804440	1737
HPD	3242	4-hydroxyphenylpyruvate dioxygenase	BC024287	18999510	1182
HPN	3249	hepsin (transmembrane protease, serine 1)	BC025716	19343934	1254
HPRP3P	9129	PRP3 pre-mRNA processing factor 3 homolog (yeast)	BC000184	12652862	2052
HPRP8BP	9410	U5 snRNP-specific 40 kDa protein (hPrp8-binding)	BC001494	16306636	1074
HPRT1	3251	hypoxanthine phosphoribosyltransferase 1 (Lesch-Nyhan syndrome)	BC000578	12653602	657
HPS3	84343	Hermansky-Pudlak syndrome 3	BC040359	25955489	3015
HRASLS3	11145	HRAS-like suppressor 3	BC001387	12655072	489
HRB2	11103	HIV-1 rev binding protein 2	BC016778	16877010	1146
HRD1	84447	synovial apoptosis inhibitor 1, synoviolin	BC030530	20988871	1854
HRIHFB2206	57215	THAP domain containing 11	BC012182	15082546	942
HRMT1L1	3275	HMT1 hnRNP methyltransferase-like 1 (S. cerevisiae)	BC000727	12653870	1302
HRMT1L3	56341	HMT1 hnRNP methyltransferase-like 4 (S. cerevisiae)	BC022458	18490668	1005
HSA011916	23399	dullard homolog (Xenopus laevis)	BC009295	14424543	735
HSA250839	55351	serine/threonine kinase 32B	BC038238	23398527	1245
HSA275986	55802	decapping enzyme	BC007439	13938576	1749
HSA9761	27292	putative dimethyladenosine transferase	BC010874	14790070	942
HSD11B1	3290	hydroxysteroid (11-beta) dehydrogenase 1	BC012593	15214911	879
HSD17B12	51144	hydroxysteroid (17-beta) dehydrogenase 12	BC012043	15082280	939
HSD17B2	3294	hydroxysteroid (17-beta) dehydrogenase 2	BC009581	16307010	1164
HSD17B3	3293	hydroxysteroid (17-beta) dehydrogenase 3	BC034281	21706851	933
HSD17B4	3295	hydroxysteroid (17-beta) dehydrogenase 4	BC003098	13111860	2211
HSD3B1	3283	hydroxy-delta-5-steroid dehydrogenase, 3 beta- and steroid delta-isomerase 1	BC031999	21619293	1122
HSD3B2	3284	hydroxy-delta-5-steroid dehydrogenase, 3 beta- and steroid delta-isomerase 2	BC038419	23468232	1119
HSD3B7	80270	hydroxy-delta-5-steroid dehydrogenase, 3 beta- and steroid delta-isomerase 7	BC004929	13436259	1110
HSF1	3297	heat shock transcription factor 1	BC014638	15779146	1590
HSGT1	11319	suppressor of S. cerevisiae gcr2	BC000721	12653860	1935
HSH2	84941	hematopoietic SH2 domain containing	BC025237	34783290	1059
HSPA1A	3303	heat shock 70kDa protein 1A	BC009322	14424587	1926
HSPA2	3306	heat shock 70kDa protein 2	BC001752	12804654	1920
HSPA5	3309	heat shock 70kDa protein 5 (glucose-regulated protein, 78kDa)	BC020235	18044380	1965
HSPA6	3310	heat shock 70kDa protein 6 (HSP70B')	BC035665	23274231	1932
HSPA8	3312	heat shock 70kDa protein 8	BC016179	16740592	1941
HSPB1	3315	heat shock 27kDa protein 1	BC012292	15126734	618
HSPB7	27129	heat shock 27kDa protein family, member 7 (cardiovascular)	BC006319	13623438	513
HSPBAP1	79663	HSPB (heat shock 27kDa) associated protein 1	BC011897	15080263	1467
HSPBP1	23640	hsp70-interacting protein	BC001236	12654786	1089
HSPC003	28956	mitogen-activated protein-binding protein-interacting protein	BC024190	38013944	378
HSPC009	28958	HSPC009 protein	BC002698	12803722	321
HSPC016	51372	hypothetical protein HSPC016	BC001102	12654536	195
HSPC023	28974	HSPC023 protein	BC015465	15930040	300
HSPC031	51388	comparative gene identification transcript 37	BC015941	16198519	543
HSPC039	51124	immediate early response 3 interacting protein 1	BC010888	15011987	249
HSPC043	58493	chromosome 9 open reading frame 80	BC014881	15928841	315
HSPC047	29060	HSPC047 protein	BC035371	23271343	483
HSPC063	29068	HSPC063 protein	BC030580	21040474	1713
HSPC105	93517	NAD(P) dependent steroid dehydrogenase-like	BC019670	18043624	1152
HSPC117	51493	hypothetical protein HSPC117	BC000151	12652798	1518
HSPC126	29079	mediator of RNA polymerase II transcription, subunit 4 homolog (yeast)	BC005189	13528773	813
HSPC129	51496	hypothetical protein HSPC129	BC035744	23273026	1401
HSPC132	51499	p53-inducible cell-survival factor	BC002638	12803606	231
HSPC135	29083	HSPC135 protein	BC037163	22713535	855
HSPC138	51501	hypothetical protein HSPC138	BC001677	12804532	594
HSPC150	29089	HSPC150 protein similar to ubiquitin-conjugating enzyme	BC004152	13278752	594
HSPC152	51504	hypothetical protein HSPC152	BC017172	16877889	378
HSPC154	29090	chromosome 18 open reading frame 55	BC000892	12654148	747
HSPC155	51506	Ufm1-conjugating enzyme 1	BC005187	13528770	504
HSPC163	29097	HSPC163 protein	BC000573	12653594	420
HSPC166	29099	COMM domain containing 9	BC010892	15011994	597
HSPC171	29100	HSPC171 protein	BC003080	13111781	522
HSPC177	51510	SNF7 domain containing 2	BC006974	13937758	660
HSPC182	29101	HSPC182 protein	BC008070	14165532	585
HSPC189	51545	zinc finger protein 581	BC001219	12654752	594
HSPC194	51522	transmembrane protein 14C	BC002496	12803354	339
HSPC195	51523	CXXC finger 5	BC002490	12803342	684
HSPC196	51524	hypothetical protein HSPC196	BC005201	13528803	489
HSPC228	51534	chromosome 6 open reading frame 55	BC006989	13937779	924
HSPCB	3326	heat shock 90kDa protein 1, beta	BC004928	13436256	2175
HSPD1	3329		BC003030.1	12804340	1722
HSPE1	3336	heat shock 10kDa protein 1 (chaperonin 10)	BC023518	33871754	309
HSPH1	10808	heat shock 105kDa/110kDa protein 1	BC037553	22902176	2577
HSRNAFEV	54738		BC023511.2	33871725	717
HSU53209	29896	transformer-2 alpha	BC017094	16877710	849
HSU79274	29902	protein predicted by clone 23733	BC020967	18088080	822
HT007	55863	uncharacterized hypothalamus protein HT007	BC012065	15082318	603
HT010	55854	likely ortholog of mouse immediate early response, erythropoietin 4	BC021102	18088891	1281
HT014	57095	HT014	BC017208	16877980	636
HTATSF1	27336	HIV TAT specific factor 1	BC009896	14602771	2268
HTCD37	58497	prune homolog (Drosophila)	BC025304	22137638	1362
HTGN29	56951	chromosome 5 open reading frame 15	BC020875	18088790	798
HTN3	3347	histatin 3	BC009791	14602560	156
HTR1D	3352	5-hydroxytryptamine (serotonin) receptor 1D	BC007720	14043458	1134
HTR3A	3359	5-hydroxytryptamine (serotonin) receptor 3A	BC002354	12803100	1437
HTRA3	94031	HtrA serine peptidase 3	BC035717	23273037	1362
HUMAUANTIG	29889	guanine nucleotide binding protein-like 2 (nucleolar)	BC000107	12652714	2196
HUMNPIIY20	64582	G protein-coupled receptor 135	BC032831	23270941	1449
HYAL1	3373	hyaluronoglucosaminidase 1	BC035695	23273468	1308
HYAL2	8692	hyaluronoglucosaminidase 2	BC000692	12653806	1422
HYAL3	8372	hyaluronoglucosaminidase 3	BC012892	15277616	1254
HYPE	11153	Huntingtin interacting protein E	BC001342	12654988	1350
ICA1	3382	islet cell autoantigen 1, 69kDa	BC008640	14250410	1449
ICAM1	3383	intercellular adhesion molecule 1 (CD54), human rhinovirus receptor	BC015969	16359010	1599
ICAM2	3384	intercellular adhesion molecule 2	BC003097	13111858	828
ICAM4	3386	intercellular adhesion molecule 4, Landsteiner-Wiener blood group	BC029364	20810185	816
ICAM5	7087	intercellular adhesion molecule 5, telencephalin	BC026338	20071180	2775
ICAP-1A	9270	integrin beta 1 binding protein 1	BC012264	15126672	603
ICT1	3396	immature colon carcinoma transcript 1	BC015335	15929831	621
ID1	3397	inhibitor of DNA binding 1, dominant negative helix-loop-helix protein	BC012420	15214588	468
ID2	3398	inhibitor of DNA binding 2, dominant negative helix-loop-helix protein	BC030639	21040394	405
ID3	3399	inhibitor of DNA binding 3, dominant negative helix-loop-helix protein	BC003107	13111878	360
IDH1	3417	isocitrate dehydrogenase 1 (NADP+), soluble	BC012846	15277487	1245
IDH2	3418	isocitrate dehydrogenase 2 (NADP+), mitochondrial	BC009244	14328061	1359
IDH3A	3419	isocitrate dehydrogenase 3 (NAD+) alpha	BC021967	18314367	1101
IDH3B	3420	isocitrate dehydrogenase 3 (NAD+) beta	BC001960	12805012	1158
IFI16	3428	interferon, gamma-inducible protein 16	BC017059	16877621	2190
IFI27	3429	interferon, alpha-inducible protein 27	BC015492	15930098	360
IFI30	10437	interferon, gamma-inducible protein 30	BC021136	18089291	753
IFI35	3430	interferon-induced protein 35	BC001356	12655016	867
IFIT1	3434	interferon-induced protein with tetratricopeptide repeats 1	BC007091	13937955	1437
IFITM1	8519	interferon induced transmembrane protein 1 (9-27)	BC000897	12654158	378
IFITM2	10581	interferon induced transmembrane protein 2 (1-8D)	BC009696	16307214	399
IFITM3	10410	interferon induced transmembrane protein 3 (1-8U)	BC006794	13905021	402
IFNAR1	3454	interferon (alpha, beta and omega) receptor 1	BC021825	18255501	1674
IFNAR2	3455	interferon (alpha, beta and omega) receptor 2	BC002793	12803892	996
IFNGR2	3460	interferon gamma receptor 2 (interferon gamma transducer 1)	BC003624	13177681	1014
IFRG28	64108	28kD interferon responsive protein	BC013161	15341941	741
IGBP1	3476	immunoglobulin (CD79A) binding protein 1	BC004137	13278713	1020
IGF2	3481	insulin-like growth factor 2 (somatomedin A)	BC000531	12653518	543
IGFALS	3483	insulin-like growth factor binding protein, acid labile subunit	BC025681	19344009	1818
IGFBP2	3485	insulin-like growth factor binding protein 2, 36kDa	BC004312	13279202	987
IGFBP3	3486	insulin-like growth factor binding protein 3	BC000013	12652546	876
IGFBP6	3489	insulin-like growth factor binding protein 6	BC003507	13097569	723
IGKV1D-13	28902	immunoglobulin kappa variable 1D-13	BC030813	21410095	705
IGL	221756	hypothetical protein MGC39372	BC025340	19263721	99
IGL@	3535	immunoglobulin lambda locus	BC030984	21410210	711
IGLL1	3543	immunoglobulin lambda-like polypeptide 1	BC012293	15126737	642
IGSF6	10261	immunoglobulin superfamily, member 6	BC017844	17389638	726
IGSF9	57549	immunoglobulin superfamily, member 9	BC030141	33879604	3492
IHPK2	51447	inositol hexaphosphate kinase 2	BC019694	18043110	1281
IK	3550	IK cytokine, down-regulator of HLA II	BC013005	15278159	1674
IKBKG	8517	inhibitor of kappa light polypeptide gene enhancer in B-cells, kinase gamma	BC000299	12653066	1260
IL10RA	3587	interleukin 10 receptor, alpha	BC028082	20380859	1737
IL10RB	3588	interleukin 10 receptor, beta	BC001903	12804902	978
IL11	3589	interleukin 11	BC012506	15341754	600
IL11RA	3590	interleukin 11 receptor, alpha	BC003110	13111884	1269
IL13RA1	3597	interleukin 13 receptor, alpha 1	BC009960	14602931	1284
IL13RA2	3598	interleukin 13 receptor, alpha 2	BC033705	34783375	1143
IL15	3600	interleukin 15	BC018149	34783292	489
IL17BR	55540	interleukin 17 receptor B	BC000980	12654318	1509
IL17D	53342	interleukin 17D	BC036243	23274137	609
IL17R	23765	interleukin 17 receptor	BC011624	15079610	2601
IL1A	3552	interleukin 1, alpha	BC013142	15341912	816
IL1B	3553	interleukin 1, beta	BC008678	14250476	810
IL1F5	26525	interleukin 1 family, member 5 (delta)	BC024747	19353229	468
IL1F7	27178	interleukin 1 family, member 7 (zeta)	BC020637	18088327	657
IL1RL1LG	11018	transmembrane emp24 domain containing 1	BC002443	12803256	684
IL1RN	3557	interleukin 1 receptor antagonist	BC009745	14602478	480
IL21R	50615		BC004348.1	13279298	1617
IL22RA1	58985	interleukin 22 receptor, alpha 1	BC029273	20810509	1725
IL24	11009	interleukin 24	BC009681	16307184	624
IL2RB	3560	interleukin 2 receptor, beta	BC025691	19343610	1656
IL2RG	3561	interleukin 2 receptor, gamma (severe combined immunodeficiency)	BC014972	15929027	1110
IL3RA	3563	interleukin 3 receptor, alpha (low affinity)	BC035407	23273418	1137
IL6	3569	interleukin 6 (interferon, beta 2)	BC015511	15930148	639
IL8	3576	interleukin 8	BC013615	15488983	300
IL8RA	3577	interleukin 8 receptor, alpha	BC028221	20380430	1053
IL8RB	3579	interleukin 8 receptor, beta	BC037961	23273708	1083
ILF2	3608	interleukin enhancer binding factor 2, 45kDa	BC000382	12653226	1173
ILK	3611	integrin-linked kinase	BC001554	16306740	1359
ILKAP	80895	integrin-linked kinase-associated serine/threonine phosphatase 2C	BC006576	16306906	1179
IMP-2	10644	IGF-II mRNA-binding protein 2	BC021290	18204200	1797
IMPACT	55364	hypothetical protein IMPACT	BC034016	21706443	963
IMPDH2	3615		BC006124.1	13543972	1545
INA	9118	internexin neuronal intermediate filament protein, alpha	BC006359	13623506	1500
INHA	3623	inhibin, alpha	BC006391	13623556	1101
INHBA	3624	inhibin, beta A (activin A, activin AB alpha polypeptide)	BC007858	14043814	1281
INHBB	3625	inhibin, beta B (activin AB beta polypeptide)	BC030029	20988635	1224
INPP4A	3631	inositol polyphosphate-4-phosphatase, type I, 107kDa	BC028361	20306648	2919
INS	3630	insulin	BC005255	13528923	333
IPLA2(GAMMA)	50640	intracellular membrane-associated calcium-independent phospholipase A2 gamma	BC032999	21542504	2349
IPO11	51194	importin 11	BC033776	21707127	2928
IRAK4	51135	interleukin-1 receptor-associated kinase 4	BC013316	15426431	1383
IRF1	3659	interferon regulatory factor 1	BC009483	14550468	978
IRF3	3661	interferon regulatory factor 3	BC009395	14424769	1359
IRF4	3662	interferon regulatory factor 4	BC015752	16041743	1356
IRF5	3663	interferon regulatory factor 5	BC004139	13278719	1497
IRO039700	55898	smooth muscle cell associated protein-1	BC006214	13623232	2835
IRX3	79191	iroquois homeobox protein 3	BC023667	33879304	1506
ISL1	3670	ISL1 transcription factor, LIM/homeodomain, (islet-1)	BC031213	22658389	1050
ISLR	3671	immunoglobulin superfamily containing leucine-rich repeat	BC022478	18490896	1287
ISYNA1	51477	myo-inositol 1-phosphate synthase A1	BC018952	17511981	1677
ITGA5	3678	integrin, alpha 5 (fibronectin receptor, alpha polypeptide)	BC008786	14250643	3150
ITGAX	3687	integrin, alpha X (antigen CD11C (p150), alpha polypeptide)	BC038237	23398602	3510
ITGB1	3688	integrin, beta 1 (fibronectin receptor, beta polypeptide, antigen CD29 includes MDF2, MSK12)	BC020057	18042959	2397
ITGB2	3689	integrin, beta 2 (antigen CD18 (p95), lymphocyte function-associated antigen 1; macrophage antigen 1 (mac-1) beta subunit)	BC005861	13543406	2310
ITGB4BP	3692	integrin beta 4 binding protein	BC001119	12654568	738
ITGB5	3693	integrin, beta 5	BC006541	16306830	2400
ITGB7	3695	integrin, beta 7	BC015916	16198470	2397
ITM2B	9445	integral membrane protein 2B	BC016148	16740549	801
ITPA	3704	inosine triphosphatase (nucleoside triphosphate pyrophosphatase)	BC010138	14603361	585
ITPK1	3705	inositol 1,3,4-triphosphate 5/6 kinase	BC018192	17390428	1245
IVD	3712	isovaleryl Coenzyme A dehydrogenase	BC017202	16877963	1272
Jade-1	79960	PHD finger protein 17	BC032376	21595373	1530
JFC1	84958	synaptotagmin-like 1	BC035725	23274197	1689
JIK	51347	TAO kinase 3	BC002756	12803830	2697
JM1	28952	chromosome X open reading frame 37	BC000972	12803024	1884
JM11	90060	JM11 protein	BC008769	14250617	1893
JM5	11152	WD repeat domain 45	BC000464	12653388	1083
JPH3	57338	junctophilin 3	BC036533	22328099	2247
JUB	84962	jub, ajuba homolog (Xenopus laevis)	BC007580	14043184	1617
JUN	3725	v-jun sarcoma virus 17 oncogene homolog (avian)	BC002646	12803622	996
JUNB	3726	jun B proto-oncogene	BC004250	13279019	1044
JUP	3728	junction plakoglobin	BC000441	12653344	2238
KAI1	3732	CD82 antigen	BC000726	12653868	804
K-ALPHA-1	10376	tubulin, alpha, ubiquitous	BC008659	14250445	1356
KARS	3735	lysyl-tRNA synthetase	BC004132	13278704	1794
KATNB1	10300	katanin p80 (WD repeat containing) subunit B 1	BC001353	12655010	1968
KBRAS1	28512	NFKB inhibitor interacting Ras-like 1	BC012145	15082457	579
KBRAS2	28511	NFKB inhibitor interacting Ras-like 2	BC007450	13938596	576
KCNA3	3738	potassium voltage-gated channel, shaker-related subfamily, member 3	BC035059	23274151	1572
KCNE1L	23630	KCNE1-like	BC035330	23273962	429
KCNE3	10008	potassium voltage-gated channel, Isk-related family, member 3	BC032235	21595514	312
KCNE4	23704	potassium voltage-gated channel, Isk-related family, member 4	BC014429	15680166	513
KCNF1	3754	potassium voltage-gated channel, subfamily F, member 1	BC026110	19913490	1485
KCNG4	93107	potassium voltage-gated channel, subfamily G, member 4	BC008969	14286334	771
KCNJ10	3766	potassium inwardly-rectifying channel, subfamily J, member 10	BC034036	21706492	1140
KCNJ13	3769	potassium inwardly-rectifying channel, subfamily J, member 13	BC037290	22713407	1083
KCNJ15	3772	potassium inwardly-rectifying channel, subfamily J, member 15	BC013327	15426449	1128
KCNJ16	3773	potassium inwardly-rectifying channel, subfamily J, member 16	BC033038	21542579	1257
KCNJ3	3760	potassium inwardly-rectifying channel, subfamily J, member 3	BC022495	18490907	1506
KCNJ8	3764	potassium inwardly-rectifying channel, subfamily J, member 8	BC000544	12653542	1275
KCNK1	3775	potassium channel, subfamily K, member 1	BC018051	17390102	1011
KCNK13	56659	potassium channel, subfamily K, member 13	BC012779	15215362	1227
KCNK17	89822	potassium channel, subfamily K, member 17	BC025726	19343980	999
KCNK6	9424		BC004367.1	13325107	942
KCNMB2	10242	potassium large conductance calcium-activated channel, subfamily M, beta member 2	BC017825	17389593	708
KCNN4	3783	potassium intermediate/small conductance calcium-activated channel, subfamily N, member 4	BC015337	15929836	1284
KCNRG	283518	potassium channel regulator	BC032343	21619603	819
KCNS3	3790	potassium voltage-gated channel, delayed-rectifier, subfamily S, member 3	BC015947	16198530	1476
KCNV1	27012	potassium channel, subfamily V, member 1	BC028739	20381120	1503
KCP2	200185	keratinocyte associated protein 2	BC029806	20987524	489
KDELC1	79070	KDEL (Lys-Asp-Glu-Leu) containing 1	BC001297	12654902	1509
KDELR1	10945	KDEL (Lys-Asp-Glu-Leu) endoplasmic reticulum protein retention receptor 1	BC018778	17511855	639
KDELR2	11014	KDEL (Lys-Asp-Glu-Leu) endoplasmic reticulum protein retention receptor 2	BC008081	14165554	639
KDELR3	11015	KDEL (Lys-Asp-Glu-Leu) endoplasmic reticulum protein retention receptor 3	BC001277	12654866	645
KEAP1	9817	kelch-like ECH-associated protein 1	BC015945	16198526	1875
KEL	3792		BC003135.1	13111928	2199
KEO4	10613	SPFH domain family, member 1	BC031791	21618848	1041
KERA	11081	keratocan	BC032667	34785051	1059
KHDRBS1	10657	KH domain containing, RNA binding, signal transduction associated 1	BC000717	12653852	1332
KHDRBS3	10656	KH domain containing, RNA binding, signal transduction associated 3	BC032606	34192364	1041
KIAA0057	9697	translocation associated membrane protein 2	BC028121	20380105	1113
KIAA0212	9695	ER degradation enhancer, mannosidase alpha-like 1	BC019088	17512211	1974
KIAA0419	9738	CP110 protein	BC036654	22477168	2976
KIAA0616	23373	mucoepidermoid carcinoma translocated 1	BC028050	20380066	1905
KIAA0857	26056	RAB11 family interacting protein 5 (class I)	BC035013	23271267	1959
KIAA0940	22849	cytoplasmic polyadenylation element binding protein 3	BC036444	22209059	2094
KIAA1320	57531	HECT domain and ankyrin repeat containing, E3 ubiquitin protein ligase 1	BC034982	23025729	2730
KIAA1919	91749	KIAA1919	BC036115	23271319	1557
KIAA1932	114823	leukocyte receptor cluster (LRC) member 8	BC028048	23271984	2403
KIF2	3796	kinesin heavy chain member 2	BC031828	34783028	2040
KIF20A	10112	kinesin family member 20A	BC012999	15278115	2673
KIF22	3835	kinesin family member 22	BC028155	20380446	1998
KIF23	9493	kinesin family member 23	BC017705	17389312	2883
KIF2C	11004	kinesin family member 2C	BC014924	15928917	2178
KIF9	64147	kinesin family member 9	BC030657	21040445	2373
KIFAP3	22920	kinesin-associated protein 3	BC028679	20380972	2379
KIFC3	3801	kinesin family member C3	BC001211	12654738	2085
KIN	22944	KIN, antigenic determinant of recA protein homolog (mouse)	BC017309	16878214	1182
KIR2DL3	3804	killer cell immunoglobulin-like receptor, two domains, long cytoplasmic tail, 3	BC032422	21619552	1026
KIR3DL1	3811	killer cell immunoglobulin-like receptor, three domains, long cytoplasmic tail, 1	BC028206	20380916	1335
KISS1	3814	KiSS-1 metastasis-suppressor	BC022819	22137578	417
KLC2	64837	likely ortholog of kinesin light chain 2	BC034373	21707804	1869
KLF12	11278	Kruppel-like factor 12	BC019680	18043612	1209
KLF13	51621	Kruppel-like factor 13	BC012741	15215310	867
KLF15	28999	Kruppel-like factor 15	BC036733	22477258	1251
KLF4	9314	Kruppel-like factor 4 (gut)	BC029923	20987475	1413
KLF5	688	Kruppel-like factor 5 (intestinal)	BC007695	14043405	1374
KLHDC2	23588	kelch domain containing 2	BC002335	12803068	1221
KLHL1	57626	kelch-like 1 (Drosophila)	BC022460	18490388	2247
KLHL2	11275	kelch-like 2, Mayven (Drosophila)	BC022503	18490683	1782
KLHL6	89857	kelch-like 6 (Drosophila)	BC032348	21619049	1833
KLK1	3816	kallikrein 1, renal/pancreas/salivary	BC005313	13529058	789
KLK10	5655	kallikrein 10	BC002710	12803744	831
KLK2	3817	kallikrein 2, prostatic	BC005196	13528791	786
KLK3	354	kallikrein 3, (prostate specific antigen)	BC005307	13529043	786
KLK5	25818	kallikrein 5	BC008036	14165477	882
KLK6	5653	kallikrein 6 (neurosin, zyme)	BC015525	15930185	735
KLK7	5650	kallikrein 7 (chymotryptic, stratum corneum)	BC032005	21594211	762
KLRC1	3821	killer cell lectin-like receptor subfamily C, member 1	BC012550	15214825	648
KLRC4	8302	killer cell lectin-like receptor subfamily C, member 4	BC017784	17389488	477
KLRD1	3824	killer cell lectin-like receptor subfamily D, member 1	BC028009	20381349	540
KLRG1	10219	killer cell lectin-like receptor subfamily G, member 1	BC012621	15214983	588
KNS2	3831	kinesin 2 60/70kDa	BC008881	14250821	1683
KPNA1	3836	karyopherin alpha 1 (importin alpha 5)	BC002374	12803140	1617
KPNA2	3838	karyopherin alpha 2 (RAG cohort 1, importin alpha 1)	BC005978	13543656	1590
KPNA3	3839	karyopherin alpha 3 (importin alpha 4)	BC017355	16878322	1566
KPNA4	3840	karyopherin alpha 4 (importin alpha 3)	BC034493	21759796	1566
KPNA6	23633	karyopherin alpha 6 (importin alpha 7)	BC020520	18088180	1611
KPNB1	3837	karyopherin (importin) beta 1	BC003572	13097743	2631
KPNB2	3842	transportin 1	BC040340	25955634	2673
KPNB3	3843	RAN binding protein 5	BC001497	37589090	3294
KRAS2	3845	v-Ki-ras2 Kirsten rat sarcoma viral oncogene homolog	BC013572	15488882	567
KREMEN2	79412	kringle containing transmembrane protein 2	BC003533	13097629	1263
KRT10	3858	keratin 10 (epidermolytic hyperkeratosis; keratosis palmaris et plantaris)	BC034697	21961604	1755
KRT13	3860	keratin 13	BC002661	12803652	1377
KRT14	3861	keratin 14 (epidermolysis bullosa simplex, Dowling-Meara, Koebner)	BC019097	17512235	1419
KRT15	3866	keratin 15	BC002641	12803612	1371
KRT16	3868	keratin 16 (focal non-epidermolytic palmoplantar keratoderma)	BC039169	24659601	1422
KRT17	3872	keratin 17	BC000159	14198020	1299
KRT18	3875	keratin 18	BC000180	13111814	1293
KRT19	3880	keratin 19	BC002539	12803430	1203
KRT20	54474	keratin 20	BC031559	21594988	1275
KRT23	25984	keratin 23 (histone deacetylase inducible)	BC028356	20306863	1269
KRT5	3852	keratin 5 (epidermolysis bullosa simplex, Dowling-Meara/Kobner/Weber-Cockayne types)	BC024292	18999434	1773
KRT6A	3853	keratin 6A	BC008807	14250681	1695
KRT6B	3854	keratin 6B	BC034535	21961226	1695
KRT7	3855	keratin 7	BC002700	12803726	1410
KRT8	3856	keratin 8	BC000654	12653736	1452
KRTAP3-2	83897	keratin associated protein 3-2	BC034582	21961309	297
KRTAP4-12	83755	keratin associated protein 4-12	BC004180	13278824	606
KRTHA3B	3884	keratin, hair, acidic, 3B	BC009971	14602964	1215
KSP37	83888	Ksp37 protein	BC025720	19343682	672
L3MBTL2	83746	l(3)mbt-like 2 (Drosophila)	BC017191	16877934	2118
LAD1	3898	ladinin 1	BC009742	14602472	1554
LAIR1	3903	leukocyte-associated Ig-like receptor 1	BC027899	20379722	864
LAMP1	3916	lysosomal-associated membrane protein 1	BC021288	18204185	1254
LAMP2	3920	lysosomal-associated membrane protein 2	BC002965	12804214	1233
LAMP3	27074	lysosomal-associated membrane protein 3	BC032940	21432042	1251
LAMR1	3921	ribosomal protein SA	BC013827	16307601	888
LANCL1	10314	LanC lantibiotic synthetase component C-like 1 (bacterial)	BC028685	20381081	1200
LANGERIN	50489	CD207 antigen, langerin	BC022278	18490603	987
LANO	55227	leucine rich repeat containing 1	BC003193	13112034	1575
LARS2	23395	leucyl-tRNA synthetase 2, mitochondrial	BC025989	19683963	2712
LASP1	3927	LIM and SH3 protein 1	BC012460	15214661	786
LBP	3929	lipopolysaccharide binding protein	BC022256	18490597	1434
LBR	3930	lamin B receptor	BC020079	18042833	1848
LCK	3932	lymphocyte-specific protein tyrosine kinase	BC013200	15341996	1620
LCP1	3936	lymphocyte cytosolic protein 1 (L-plastin)	BC007673	14043358	1884
LCP2	3937	lymphocyte cytosolic protein 2 (SH2 domain containing leukocyte protein of 76kDa)	BC016618	16741629	1602
LDB1	8861	LIM domain binding 1	BC000482	12653422	1128
LDB2	9079	LIM domain binding 2	BC034019	21706449	1122
LDHB	3945	lactate dehydrogenase B	BC002362	12803116	1005
LDLR	3949	low density lipoprotein receptor (familial hypercholesterolemia)	BC014514	15680297	2583
LEFTB	10637	left-right determination factor 1	BC027883	20379728	1101
LENG1	79165	leukocyte receptor cluster (LRC) member 1	BC014986	15929060	795
LENG5	79042	leukocyte receptor cluster (LRC) member 5	BC000944	12803012	1173
LEPROTL1	23484	leptin receptor overlapping transcript-like 1	BC000642	12653714	396
LETM1	3954	leucine zipper-EF-hand containing transmembrane protein 1	BC021208	18204588	2220
LGALS1	3956	lectin, galactoside-binding, soluble, 1 (galectin 1)	BC001693	12804556	408
LGALS3	3958	lectin, galactoside-binding, soluble, 3 (galectin 3)	BC001120	12654570	753
LGALS3BP	3959	lectin, galactoside-binding, soluble, 3 binding protein	BC002403	12803194	1758
LGALS4	3960	lectin, galactoside-binding, soluble, 4 (galectin 4)	BC003661	13177786	972
LGALS8	3964	lectin, galactoside-binding, soluble, 8 (galectin 8)	BC015818	16198352	1077
LGI1	9211	leucine-rich, glioma inactivated 1	BC022500	18490909	1674
LGMN	5641	legumain	BC003061	13111749	1302
LGN	29899	G-protein signalling modulator 2 (AGS3-like, C. elegans)	BC027732	33879507	2034
LGTN	1939	ligatin	BC001585	16306781	1755
LHFP	10186	lipoma HMGIC fusion partner	BC017824	17389590	603
LHX4	89884	LIM homeobox 4	BC011759	15079939	1173
LIG4	3981	ligase IV, DNA, ATP-dependent	BC037491	22766795	2736
LILRA3	11026	leukocyte immunoglobulin-like receptor, subfamily A (without TM domain), member 3	BC028208	20381358	1320
LILRB1	10859	leukocyte immunoglobulin-like receptor, subfamily B (with TM and ITIM domains), member 1	BC015731	16041710	1953
LILRB4	11006	leukocyte immunoglobulin-like receptor, subfamily B (with TM and ITIM domains), member 4	BC026309	20072231	1347
LILRB5	10990	leukocyte immunoglobulin-like receptor, subfamily B (with TM and ITIM domains), member 5	BC025704	19344005	1773
LIM	10611	PDZ and LIM domain 5	BC008741	14250572	1791
LIMR	55716	lipocalin-interacting membrane receptor	BC015015	15929115	1470
LIN-28	79727		BC028566.2	33872076	630
LIP8	116840	LYST-interacting protein LIP8	BC021134	21594795	2712
LMAN1	3998	lectin, mannose-binding, 1	BC032330	21595547	1533
LMCD1	29995	LIM and cysteine-rich domains 1	BC000646	12653722	1098
LMNB1	4001	lamin B1	BC012295	15126741	1761
LMNB2	84823	lamin B2	BC006551	16306858	1803
LMO2	4005	LIM domain only 2 (rhombotin-like 1)	BC034041	21706498	477
LMO4	8543	LIM domain only 4	BC017673	17389228	498
LMO6	4007	LIM domain only 6	BC016856	16877180	1848
LNIR	81607	poliovirus receptor-related 4	BC010423	14714573	1533
LNX	84708	ligand of numb-protein X	BC034737	21961542	1899
LOC112970	112970	hypothetical protein BC012173	BC012173	15082524	1065
LOC114987	114987	WD repeat domain 31	BC012352	15214451	1101
LOC115330	115330	G protein-coupled receptor 146	BC014241	15559780	1002
LOC162540	162540	intramembrane protease 5	BC025401	19263992	2055
LOC168391	168391	UDP-N-acetyl-alpha-D-galactosamine:polypeptide N-acetylgalactosaminyltransferase-like 5	BC022021	18314428	1332
LOC200420	200420	LOC200420	BC014492	15680270	633
LOC56906	56906	THAP domain containing 10	BC027857	20381235	774
LOC64172	64172	O-sialoglycoprotein endopeptidase-like 1	BC011904	15080281	1245
LOC89953	89953	kinesin-like 8	BC012357	15214465	948
LOC90326	90326	THAP domain containing, apoptosis associated protein 3	BC022081	18314596	720
LOC90507	90507	secernin 2	BC017317	16878236	1278
LOC90990	90990	kinesin family member C2	BC017311	16878220	2517
LOC92565	92565	fibronectin type III and ankyrin repeat domains 1	BC024189	18848334	1020
LOH12CR1	118426	loss of heterozygosity, 12, chromosomal region 1	BC013668	15489113	591
LOXL1	4016	lysyl oxidase-like 1	BC015090	15929302	1725
LOXL2	4017	lysyl oxidase-like 2	BC000594	12653632	2325
LOXL4	84171	lysyl oxidase-like 4	BC013153	15341930	2271
LPIN1	23175	lipin 1	BC030537	20987794	2673
LPL	4023	lipoprotein lipase	BC011353	15030192	1428
LPLUNC2	80341	bactericidal/permeability-increasing protein-like 1	BC034415	21706775	1377
LPXN	9404	leupaxin	BC019035	17512108	1161
LRDD	55367	leucine-rich repeats and death domain containing	BC014904	15928879	2682
LRP3	4037	low density lipoprotein receptor-related protein 3	BC007408	13938518	2313
LRRN1	4034	leucine-rich repeats and calponin homology (CH) domain containing 4	BC018529	17391255	2052
LSAMP	4045	limbic system-associated membrane protein	BC033803	22832918	1017
LSM2	57819	LSM2 homolog, U6 small nuclear RNA associated (S. cerevisiae)	BC009192	14327935	288
LSM6	11157	LSM6 homolog, U6 small nuclear RNA associated (S. cerevisiae)	BC016026	16359117	243
LSM7	51690	LSM7 homolog, U6 small nuclear RNA associated (S. cerevisiae)	BC018621	17391361	312
LSS	4047	lanosterol synthase (2,3-oxidosqualene-lanosterol cyclase)	BC035638	23242913	2199
LTA	4049	lymphotoxin alpha (TNF superfamily, member 1)	BC034729	21961576	618
LTB4R	1241	leukotriene B4 receptor	BC004545	13528695	1059
LTBR	4055	lymphotoxin beta receptor (TNFR superfamily, member 3)	BC026262	20072212	1308
LTC4S	4056	leukotriene C4 synthase	BC029498	20809585	453
LTF	4057	lactotransferrin	BC015822	16198356	2136
LUM	4060	lumican	BC007038	13937864	1017
LW-1	51402	LW-1	BC021706	18203844	1272
LY6H	4062	lymphocyte antigen 6 complex, locus H	BC028894	20810023	423
LYPLA1	10434	lysophospholipase I	BC008652	14250433	693
LYPLA2	11313	lysophospholipase II	BC017034	16877567	696
LYSAL1	9583	ectonucleoside triphosphate diphosphohydrolase 4	BC034477	21759776	1716
LYZ	4069	lysozyme (renal amyloidosis)	BC004147	13278743	447
LZTFL1	54585	leucine zipper transcription factor-like 1	BC025988	19684075	900
LZTR1	8216	leucine-zipper-like transcription regulator 1	BC026214	22382159	1659
M11S1	4076	membrane component, chromosome 11, surface marker 1	BC001731	12804616	1971
MAB21L1	4081	mab-21-like 1 (C. elegans)	BC028170	20380117	1080
MAD2L2	10459	MAD2 mitotic arrest deficient-like 2 (yeast)	BC015244	15929611	636
MADH1	4086	SMAD, mothers against DPP homolog 1 (Drosophila)	BC001878	12804860	1398
MADH2	4087	SMAD, mothers against DPP homolog 2 (Drosophila)	BC025699	19344007	1404
MADH4	4089	SMAD, mothers against DPP homolog 4 (Drosophila)	BC002379	12803150	1659
MADH6	4091	SMAD, mothers against DPP homolog 6 (Drosophila)	BC012986	15278059	1491
MADHIP	9372	zinc finger, FYVE domain containing 9	BC032680	21618607	4278
MADP-1	85437	MADP-1 protein	BC022543	18490398	654
MAFG	4097	v-maf musculoaponeurotic fibrosarcoma oncogene homolog G (avian)	BC012327	15147379	489
MAGEA1	4100	melanoma antigen family A, 1 (directs expression of antigen MZ2-E)	BC017555	17028468	930
MAGEA10	4109	melanoma antigen family A, 10	BC004105	13278641	1110
MAGEA12	4111	melanoma antigen family A, 12	BC003408	13097311	945
MAGEA2b	266740	melanoma antigen family A, 2B	BC013098	15341842	945
MAGEA3	4102	melanoma antigen family A, 3	BC000340	12653144	945
MAGEA4	4103	melanoma antigen family A, 4	BC017723	17389359	954
MAGEA9	4108	melanoma antigen family A, 9	BC002351	12803094	948
MAGEB1	4112	melanoma antigen family B, 1	BC013772	15489350	1044
MAGEB2	4113	melanoma antigen family B, 2	BC026071	19913461	960
MAGEB4	4115	melanoma antigen family B, 4	BC032852	23273911	1041
MAGED2	10916	melanoma antigen family D, 2	BC000304	12653076	1821
MAGEE1	51438	melanoma antigen family C, 2	BC005891	13543465	1122
MAGEH1	28986	melanoma antigen family H, 1	BC011954	15080399	660
MAGOH	4116	mago-nashi homolog, proliferation-associated (Drosophila)	BC018211	17390472	441
MAK3P	80218	Mak3 homolog (S. cerevisiae)	BC012731	15215283	510
MAL2	114569	mal, T-cell differentiation protein 2	BC012367	15706436	531
MALT1	10892	mucosa associated lymphoid tissue lymphoma translocation gene 1	BC030143	33879606	2442
MAN1B1	11253	mannosidase, alpha, class 1B, member 1	BC002953	12804190	2100
MAN2B1	4125	mannosidase, alpha, class 2B, member 1	BC000736	12653886	3036
MAOA	4128	monoamine oxidase A	BC008064	14165522	1584
MAP1LC3A	84557	microtubule-associated protein 1 light chain 3 alpha	BC015810	16041838	366
MAP1LC3B	81631	microtubule-associated protein 1 light chain 3 beta	BC018634	17391392	378
MAP2K1IP1	8649	mitogen-activated protein kinase kinase 1 interacting protein 1	BC026245	20072807	375
MAP2K2	5605	mitogen-activated protein kinase kinase 2	BC000471	12653402	1203
MAP2K3	5606	mitogen-activated protein kinase kinase 3	BC032478	21619100	1044
MAP2K6	5608	mitogen-activated protein kinase kinase 6	BC012009	15080539	1005
MAP2K7	5609	mitogen-activated protein kinase kinase 7	BC038295	23468314	1281
MAP3K11	4296	mitogen-activated protein kinase kinase kinase 11	BC011263	15030036	2544
MAP3K14	9020	mitogen-activated protein kinase kinase kinase 14	BC035576	23272579	2844
MAP4K5	11183	mitogen-activated protein kinase kinase kinase kinase 5	BC036013	23273902	2541
MAP7	9053	microtubule-associated protein 7	BC025777	19343693	2250
MAPA	126364	leucine rich repeat containing 25	BC025744	19343942	303
MAPK1	5594	mitogen-activated protein kinase 1	BC017832	17389605	1083
MAPK11	5600	mitogen-activated protein kinase 11	BC027933	20379774	1095
MAPK12	6300	mitogen-activated protein kinase 12	BC015741	16041726	1104
MAPK13	5603	mitogen-activated protein kinase 13	BC000433	12653328	1098
MAPK3	5595		BC013992.1	15559270	1140
MAPK6	5597	mitogen-activated protein kinase 6	BC035492	34782811	2166
MAPK9	5601	mitogen-activated protein kinase 9	BC032539	21618469	1275
MAPKAP1	79109	mitogen-activated protein kinase associated protein 1	BC002326	12803050	1461
MAPRE2	10982	microtubule-associated protein, RP/EB family, member 2	BC007318	13938369	984
MAPRE3	22924	microtubule-associated protein, RP/EB family, member 3	BC011557	15079433	846
MARCO	8685	macrophage receptor with collagenous structure	BC016004	16359078	1563
MARK2	2011	MAP/microtubule affinity-regulating kinase 2	BC008771	14250621	2268
MARK3	4140	MAP/microtubule affinity-regulating kinase 3	BC024773	19353235	2190
MAT1A	4143	methionine adenosyltransferase I, alpha	BC018359	17390836	1188
MATR3	9782	matrin 3	BC015031	15929153	2544
MB	4151	myoglobin	BC014547	15778932	465
MBD2	8932	methyl-CpG binding domain protein 2	BC032638	21595775	1236
MBDin	11321	XPA binding protein 1	BC007451	13938598	1125
MC1R	4157	melanocortin 1 receptor (alpha melanocyte stimulating hormone receptor)	BC007856	14043808	954
MCEE	84693	methylmalonyl CoA epimerase	BC020825	18089165	531
MCF2L	23263	MCF.2 cell line derived transforming sequence-like	BC020208	22507472	2955
MCL1	4170	myeloid cell leukemia sequence 1 (BCL2-related)	BC017197	16877948	1053
MCLC	23155	Mid-1-related chloride channel 1	BC002939	12804162	1506
MCM3	4172	MCM3 minichromosome maintenance deficient 3 (S. cerevisiae)	BC001626	12804438	2427
MCM7	4176	MCM7 minichromosome maintenance deficient 7 (S. cerevisiae)	BC013375	15426527	2160
MCOLN1	57192	mucolipin 1	BC005149	13477346	1743
MCP	4179	membrane cofactor protein (CD46, trophoblast-lymphocyte cross-reactive antigen)	BC030594	21040400	1155
MCRS1	10445	microspherule protein 1	BC011794	15080018	1389
MCSP	4184	mitochondrial capsule selenoprotein	BC014593	15779037	351
MDH2	4191	malate dehydrogenase 2, NAD (mitochondrial)	BC001917	12804928	1017
MDK	4192	midkine (neurite growth-promoting factor 2)	BC011704	15079797	432
MDS009	56986	x 009 protein	BC032535	34192357	915
MDS018	60490	hypothetical protein MDS018	BC014409	15680132	615
MDS027	55845	chromosome 3 open reading frame 10	BC019303	17939499	228
MDS028	55846	uncharacterized hematopoietic stem/progenitor cells protein MDS028	BC006552	16306861	1344
ME1	4199	malic enzyme 1, NADP(+)-dependent, cytosolic	BC025246	19264116	1719
ME3	10873	malic enzyme 3, NADP(+)-dependent, mitochondrial	BC022472	18490279	1815
MECP2	4204	methyl CpG binding protein 2 (Rett syndrome)	BC011612	15079579	1461
MED8	112950	mediator of RNA polymerase II transcription, subunit 8 homolog (yeast)	BC010543	14714788	639
MEL	4218	RAB8A, member RAS oncogene family	BC002977	12804236	624
MEN1	4221	multiple endocrine neoplasia I	BC002544	12803440	1728
MEST	4232	mesoderm specific transcript homolog (mouse)	BC011908	15080293	1008
METAP2	10988	methionyl aminopeptidase 2	BC013782	15489375	1437
MFAP1	4236		BC023557.2	33873330	1320
MFAP2	4237	microfibrillar-associated protein 2	BC015039	15929172	552
MFAP3	4238	microfibrillar-associated protein 3	BC026244	20070764	1089
MFN2	9927	mitofusin 2	BC017061	16877626	2274
MGAT1	4245	mannosyl (alpha-1,3-)-glycoprotein beta-1,2-N-acetylglucosaminyltransferase	BC003575	13097752	1338
MGAT2	4247	mannosyl (alpha-1,6-)-glycoprotein beta-1,2-N-acetylglucosaminyltransferase	BC006390	13623554	1344
MGC10120	282991	biogenesis of lysosome-related organelles complex-1, subunit 2	BC020494	18088216	300
MGC10485	112936	hypothetical protein MGC10485	BC009747	14602482	1011
MGC10702	84749		BC004868.1	13436088	1527
MGC10854	84260	hypothetical protein MGC10854	BC004285	13279121	1497
MGC10992	92922	hypothetical protein LOC92922	BC008285	14249826	1653
MGC13047	84795		BC006131.1	13543987	1746
MGC13105	84527		BC006436.1	13623632	1617
MGC13125	84811	hypothetical protein MGC13125	BC006350	13623490	1860
MGC13523	112611	RWD domain containing 2	BC010930	15012061	879
MGC14151	84316	hypothetical protein MGC14151	BC033861	21707072	522
MGC14480	201254	stimulated by retinoic acid 13 homolog (mouse)	BC009571	16306992	192
MGC14816	127495	hypothetical protein MGC14816	BC009613	16307071	1008
MGC15407	112942	similar to RIKEN cDNA 4931428D14 gene	BC010011	14603077	1029
MGC15548	84838	zinc finger protein 496	BC007263	13938273	1764
MGC15606	91775	family with sequence similarity 55, member C	BC009431	14495647	1680
MGC16169	93627	hypothetical protein MGC16169	BC009208	14327966	2469
MGC16386	113130	cell division cycle associated 5	BC011000	15012189	759
MGC16491	115572	family with sequence similarity 46, member B	BC012790	15215379	1275
MGC16664	148753	hypothetical protein MGC16664	BC009382	14424733	504
MGC16943	112479	similar to RIKEN cDNA 4933424N09 gene	BC010503	14714720	987
MGC17528	140576	S100 calcium binding protein A16	BC010541	14714784	312
MGC18079	146395	hypothetical protein MGC18079	BC016460	19116249	531
MGC18216	145815	hypothetical protein MGC18216	BC010607	14714901	168
MGC19606	92856	IMP4, U3 small nucleolar ribonucleoprotein, homolog (yeast)	BC010042	14603152	876
MGC19764	162394	hypothetical protein MGC19764	BC021238	18203808	1017
MGC20398	91603	hypothetical protein MGC20398	BC011584	15079508	1047
MGC20700	126321	chromosome 19 open reading frame 28	BC036706	33991499	1416
MGC21636	222235	F-box and leucine-rich repeat protein 13	BC031285	22658402	2124
MGC2198	192286	hypothetical protein MGC2198	BC000587	12653618	321
MGC23143	147807	zinc finger protein 524	BC014666	15779218	795
MGC23427	138151	BTB (POZ) domain containing 14A	BC015649	15990514	1764
MGC2376	65987	potassium channel tetramerisation domain containing 14	BC001062	12654468	678
MGC23911	146456	transmembrane emp24 protein transport domain containing 6	BC020827	18088823	723
MGC24132	131965	hypothetical protein MGC24132	BC022400	18490237	768
MGC24133	128346	hypothetical protein MGC24133	BC017973	22450811	468
MGC24665	116028	hypothetical protein MGC24665	BC022427	18490653	444
MGC24995	127435	podocan	BC028292	22418048	1209
MGC2560	83640	hypothetical LOC83640	BC003627	13177690	357
MGC2574	79080	hypothetical protein MGC2574	BC001378	12655056	1083
MGC2599	84056	katanin p60 subunit A-like 1	BC000612	12653658	1473
MGC2641	84717	hepatoma-derived growth factor-related protein 2	BC000755	12653922	2013
MGC2656	79414	leucine rich repeat and fibronectin type III domain containing 3	BC003578	13097761	1887
MGC26597	206426	hypothetical locus MGC26597	BC028580	20306245	1539
MGC26706	158747	motile sperm domain containing 2	BC030641	21040404	1557
MGC26778	219670	chromosome 10 open reading frame 63	BC026165	20072880	771
MGC26847	203328	sushi domain containing 3	BC014601	15779058	768
MGC26856	256710	hypothetical protein MGC26856	BC014603	15779064	702
MGC26877	128229	SSTK-interacting protein	BC014605	15779070	378
MGC26949	133482	solute carrier organic anion transporter family, member 6A1	BC034976	23270949	1974
MGC26989	254268	hypothetical protein MGC26989	BC030647	21040422	1248
MGC26999	169966	family with sequence similarity 46, member D	BC034979	23271016	1170
MGC27005	158852	cancer/testis antigen CT45-3	BC028711	20381102	570
MGC27044	163486	family with sequence similarity 31, member B	BC022561	18490364	1191
MGC27076	205564	SUMO1/sentrin specific protease 5	BC030705	21265144	2268
MGC27091	204219	LAG1 longevity assurance homolog 3 (S. cerevisiae)	BC034970	23271014	1152
MGC2803	79002	hypothetical protein MGC2803	BC015347	15929851	531
MGC29761	138162	chromosome 9 open reading frame 116	BC021261	18204237	279
MGC29762	150590	chromosome 2 open reading frame 15	BC021264	18204634	378
MGC29802	201780	solute carrier family 10 (sodium/bile acid cotransporter family), member 4	BC019066	17512161	1314
MGC3121	78994	hypothetical protein MGC3121	BC000119	12652736	1758
MGC3162	79050	hypothetical protein MGC3162	BC001191	12654702	1551
MGC3180	79005	sodium channel modifier 1	BC000264	12653006	693
MGC31967	203260	hypothetical protein MGC31967	BC018758	17511815	852
MGC32065	257364	hypothetical protein MGC32065	BC018775	17511849	1725
MGC32104	147657	zinc finger protein 480	BC018783	17511870	1551
MGC32124	124936	hypothetical protein MGC32124	BC020263	18044386	795
MGC3232	84273	chromosome 4 open reading frame 14	BC004894	13436154	2097
[truncated: 1,558 more rows]
