# Supplementary material for: A Biomedically Enriched Collection of 7000 Human ORF Clones
Source: PLoS One. 2008 Jan 30;3(1):e1528. doi: 10.1371/journal.pone.0001528 (PMC2211400; doi:10.1371/journal.pone.0001528)
Supplement: Table S2 — Disease MeSH Term Analysis. Complete Analysis for Gene and Diseases Association in Publications (0.57 MB XLS) [file pone.0001528.s002.xls]

## Sheet: Disease_gene_count
Disease_mesh_term	Genome count	MGC count	HFLEX7000 count	Enrichment (MGC/ genome)	Enrichment (HFLEX7000/MGC)	Enrichment (HFLEX7000/genome)
Wiskott-Aldrich Syndrome	175	102	57	1.97499	1.63547	3.23002
Vascular Diseases	337	193	135	1.94057	2.04712	3.97258
Uterine Neoplasms	769	410	244	1.80659	1.7417	3.14653
Thyroid Diseases	307	158	105	1.7439	1.94491	3.39172
Splenic Neoplasms	196	101	72	1.74609	2.08631	3.64288
Shock, Septic	431	245	149	1.92615	1.77987	3.42829
Schizophrenia	692	339	177	1.65995	1.52806	2.53651
Sandhoff Disease	26	18	13	2.34585	2.11367	4.95837
Salivary Gland Neoplasms	274	150	98	1.85499	1.91206	3.54686
Rheumatic Diseases	227	129	79	1.9256	1.79227	3.4512
Retinoblastoma	334	186	111	1.88698	1.74653	3.29568
Retinal Neoplasms	112	63	40	1.90601	1.85817	3.54169
Psoriasis	692	381	234	1.86561	1.79745	3.35335
Pseudomonas Infections	316	153	98	1.64061	1.87457	3.07545
Prostatic Neoplasms	1695	940	534	1.87914	1.66257	3.12421
Prostatic Intraepithelial Neoplasia	126	81	47	2.17829	1.69816	3.6991
Prostatic Hyperplasia	513	288	166	1.90229	1.68687	3.20893
Peritoneal Neoplasms	300	161	105	1.81847	1.90867	3.47086
Parkinson Disease, Postencephalitic	12	8	7	2.25897	2.5608	5.78477
Parkinson Disease	553	295	155	1.80759	1.53772	2.77956
Pancreatic Neoplasms	1300	711	399	1.85323	1.64237	3.04368
Osteoblastoma	15	10	9	2.25897	2.63396	5.95004
Niemann-Pick Diseases	119	79	49	2.24948	1.81525	4.08336
Neurodegenerative Diseases	299	172	101	1.94921	1.71854	3.3498
Neuroblastoma	1566	906	484	1.96037	1.56345	3.06494
Neovascularization, Pathologic	863	456	253	1.79042	1.62376	2.90723
Neoplasms, Connective Tissue	47	30	23	2.16284	2.24375	4.85287
Neoplasms, Connective and Soft Tissue	7	5	4	2.42033	2.3413	5.66671
Multiple Sclerosis	701	363	209	1.75465	1.68503	2.95663
Mental Retardation	813	377	194	1.57128	1.50601	2.36636
Mental Disorders	430	211	110	1.66271	1.52573	2.53684
Melanoma, Experimental	697	398	214	1.93487	1.57361	3.04474
Melanoma	1595	885	486	1.88012	1.60716	3.02165
Lysosomal Storage Diseases, Nervous System	3	3	2	3.38846	1.95108	6.61116
Lymphoma, T-Cell	629	330	185	1.77773	1.64068	2.91669
Lymphoma, Small Lymphocytic	86	53	39	2.08824	2.15355	4.49713
Lymphoma, Non-Hodgkin	747	388	217	1.76	1.6368	2.88077
Lymphoma, Large-Cell, Immunoblastic	41	31	25	2.562	2.36018	6.04679
Lymphoma, Large-Cell	427	259	167	2.05529	1.88705	3.87844
Lymphoma, B-Cell	829	438	249	1.79028	1.66377	2.97861
Lymphoma, AIDS-Related	180	103	74	1.93895	2.10262	4.07688
Lymphoma	1290	703	372	1.84658	1.54865	2.85971
Lupus Erythematosus, Systemic	875	480	269	1.85881	1.64013	3.04869
Lung Neoplasms	2301	1250	677	1.84075	1.58506	2.9177
Liver Neoplasms	2030	1122	590	1.87283	1.53896	2.88221
Liver Diseases	825	437	254	1.79486	1.70106	3.05315
Leukemia, Myeloid	1179	642	364	1.84511	1.65933	3.06166
Leukemia, B-Cell, Chronic	430	250	144	1.97003	1.68574	3.32096
Laryngeal Neoplasms	412	234	147	1.92451	1.83852	3.53825
Kidney Neoplasms	1191	673	369	1.91472	1.60464	3.07244
Kidney Failure, Chronic	850	431	241	1.71815	1.63647	2.81169
Kidney Diseases	816	449	270	1.86448	1.75989	3.28127
Insulin Resistance	601	313	154	1.7647	1.43994	2.54106
Inflammatory Bowel Diseases	401	211	135	1.78295	1.87249	3.33855
Inflammation	1479	784	455	1.79618	1.69849	3.05079
Hypoxia-Ischemia, Brain	148	77	48	1.76291	1.82439	3.21624
Hyperthyroidism	404	206	117	1.72778	1.66221	2.87193
Hypertension	1219	614	346	1.70674	1.64921	2.81476
Hyperoxia	253	155	89	2.07593	1.68045	3.4885
Hypercholesterolemia	391	210	135	1.81989	1.8814	3.42394
Huntington Disease	375	210	124	1.89754	1.7281	3.27914
Hodgkin Disease	681	381	229	1.89574	1.75905	3.3347
HIV Infections	987	506	290	1.73714	1.67731	2.91373
HIV Enteropathy	15	10	7	2.25897	2.04864	4.62781
Hepatoblastoma	218	124	78	1.92738	1.84094	3.54819
Hepatitis, Chronic	275	141	101	1.73735	2.09638	3.64215
Hepatitis C, Chronic	351	193	127	1.86317	1.92581	3.58811
Hemochromatosis	190	98	68	1.74773	2.03072	3.54915
Glioma	1360	775	441	1.93092	1.66534	3.21565
Glioblastoma	907	494	278	1.84553	1.64697	3.03953
Gaucher Disease	141	77	51	1.85043	1.93841	3.58691
Gastrointestinal Neoplasms	503	288	185	1.94011	1.87995	3.64731
Gastrointestinal Diseases	351	184	115	1.77629	1.82914	3.24907
Gastric Dilatation	26	18	15	2.34585	2.43885	5.7212
Gangliosidosis GM1	20	16	11	2.71077	2.01205	5.45421
Gangliosidoses GM2	17	12	9	2.39185	2.19497	5.25004
Fucosidosis	7	5	4	2.42033	2.3413	5.66671
Fructose-1,6-Diphosphatase Deficiency	7	5	4	2.42033	2.3413	5.66671
Endometrial Neoplasms	595	337	200	1.91918	1.73687	3.33336
Down Syndrome	617	335	185	1.83976	1.6162	2.97342
Diabetic Nephropathies	489	257	143	1.78085	1.62843	2.89999
Diabetes Mellitus, Type 2	959	507	274	1.79139	1.58165	2.83335
Diabetes Mellitus, Type 1	1069	541	298	1.71483	1.61208	2.76444
Diabetes Mellitus	857	444	239	1.75551	1.57537	2.76558
Crohn Disease	565	296	184	1.77519	1.81925	3.22952
Colorectal Neoplasms	1310	721	412	1.86494	1.67236	3.11885
Colonic Neoplasms	1825	1008	542	1.87154	1.57364	2.94514
Chagas Disease	282	149	98	1.79035	1.92489	3.44624
Cervix Neoplasms	904	496	284	1.85915	1.67573	3.11544
Carcinoma, Squamous Cell	1698	930	520	1.85587	1.63639	3.03693
Carcinoma, Renal Cell	816	471	279	1.95584	1.73361	3.39065
Carcinoma, Pancreatic Ductal	154	89	55	1.95826	1.80859	3.54169
Carcinoma, Non-Small-Cell Lung	914	527	298	1.95374	1.6549	3.23325
Carcinoma, Hepatocellular	1805	1018	531	1.91105	1.52656	2.91734
Carcinoma, Ductal, Breast	602	331	205	1.86309	1.81256	3.37696
Carcinoma, Adenosquamous	110	63	39	1.94066	1.81172	3.51594
Burkitt Lymphoma	735	429	243	1.97775	1.65774	3.2786
Breast Neoplasms	2695	1458	801	1.83316	1.60784	2.94742
Brain Neoplasms	1512	818	446	1.83317	1.59569	2.92518
Bone Neoplasms	885	493	277	1.88758	1.64437	3.10388
Bacterial Infections	579	309	181	1.80835	1.7143	3.10005
Autoimmune Diseases	996	523	303	1.77928	1.69554	3.01684
Astrocytoma	872	505	281	1.96235	1.62848	3.19565
Asthma	860	435	240	1.71393	1.61469	2.76746
Arthritis, Rheumatoid	1191	632	367	1.79807	1.69948	3.05579
Arthritis, Reactive	133	81	57	2.06365	2.05948	4.25003
Arthritis	533	277	172	1.76098	1.81725	3.20015
Amyotrophic Lateral Sclerosis	388	217	127	1.89509	1.71282	3.24594
Amyloidosis	300	172	105	1.94272	1.7866	3.47086
Amyloid Neuropathies	44	32	21	2.46433	1.9206	4.73299
Amino Acid Transport Disorders, Inborn	3	3	2	3.38846	1.95108	6.61116
AIDS-Associated Nephropathy	45	27	21	2.03307	2.27626	4.62781
Adrenal Gland Neoplasms	592	324	174	1.85449	1.57171	2.91472
Adenocarcinoma	2258	1219	668	1.82929	1.60376	2.93374
Acrodermatitis	39	22	17	1.91144	2.26148	4.32268
Acquired Immunodeficiency Syndrome	767	398	225	1.75829	1.6545	2.90908
Zygomycosis	7	5	4	2.42033	2.3413	5.66671
Zygomatic Fractures	6	2	1	1.12949	1.46331	1.65279
Zoster Sine Herpete	1	1	1	3.38846	2.92662	9.91674
Zoonoses	65	35	20	1.82455	1.67236	3.05131
Zollinger-Ellison Syndrome	74	38	23	1.74002	1.77138	3.08223
Zenker Diverticulum	6	2	2	1.12949	2.92662	3.30558
Zellweger Syndrome	77	46	24	2.02427	1.52693	3.09093
Yin Deficiency	4	1		0.847114
Yersinia pseudotuberculosis Infections	31	15	6	1.63958	1.17065	1.91937
Yersinia Infections	87	41	28	1.59686	1.99867	3.19159
Yellow Fever	34	21	15	2.09287	2.09045	4.37503
Yaws	11	6	4	1.84825	1.95108	3.60609
Yang Deficiency	3	1		1.12949
XYY Karyotype	9	4	3	1.50598	2.19497	3.30558
Xerostomia	70	29	24	1.40379	2.42203	3.40003
Xerophthalmia	33	15	12	1.54021	2.3413	3.60609
Xeroderma Pigmentosum	201	116	67	1.95553	1.69038	3.30558
Xanthomatosis, Cerebrotendinous	19	10	7	1.7834	2.04864	3.65354
Xanthomatosis	109	63	42	1.95847	1.95108	3.82113
Xanthogranuloma, Juvenile	42	28	20	2.25897	2.09045	4.72226
Wrist Injuries	29	8	6	0.934747	2.19497	2.05174
Wounds, Stab	86	49	29	1.93063	1.73208	3.34402
Wounds, Penetrating	161	77	48	1.62057	1.82439	2.95654
Wounds, Nonpenetrating	192	94	56	1.65893	1.74352	2.89238
Wounds, Gunshot	70	38	25	1.83945	1.92541	3.54169
Wounds and Injuries	536	285	163	1.8017	1.67382	3.01573
Wound Infection	71	31	22	1.47947	2.07696	3.07279
Wolman Disease	13	5	4	1.30325	2.3413	3.05131
Wolfram Syndrome	26	10	5	1.30325	1.46331	1.90707
Wolff-Parkinson-White Syndrome	32	14	9	1.48245	1.8814	2.78908
Williams Syndrome	95	45	21	1.60506	1.36576	2.19212
Whooping Cough	70	34	23	1.64582	1.97978	3.25836
Whipple Disease	38	24	19	2.14008	2.31691	4.95837
Whiplash Injuries	27	11	8	1.38048	2.12845	2.93829
Wheat Hypersensitivity	3	1	1	1.12949	2.92662	3.30558
West Nile Fever	19	13	8	2.31842	1.801	4.17547
Wernicke Encephalopathy	29	12	4	1.40212	0.975542	1.36783
Werner Syndrome	127	74	43	1.97438	1.70061	3.35764
Weil Disease	20	11	6	1.86365	1.59634	2.97502
Weight Loss	431	225	136	1.76892	1.76898	3.12918
Weight Gain	569	287	148	1.70912	1.5092	2.5794
Wegener's Granulomatosis	158	81	53	1.73712	1.91495	3.3265
Water-Electrolyte Imbalance	61	28	17	1.55536	1.77688	2.76368
Water Intoxication	22	6	4	0.924125	1.95108	1.80304
Wasting Syndrome	75	35	29	1.58128	2.42492	3.83447
Warts	86	46	32	1.81243	2.03591	3.68995
Wallerian Degeneration	172	107	69	2.10794	1.88726	3.97823
Waldenstrom Macroglobulinemia	138	69	54	1.69423	2.2904	3.88046
WAGR Syndrome	22	8	5	1.23217	1.82914	2.2538
Waardenburg's Syndrome	60	29	8	1.63775	0.807345	1.32223
Vulvovaginitis	10	5	5	1.69423	2.92662	4.95837
Vulvitis	13	4	4	1.0426	2.92662	3.05131
Vulvar Neoplasms	186	103	69	1.8764	1.96055	3.67879
Vulvar Diseases	61	28	19	1.55536	1.98592	3.08882
von Willebrand Disease	119	67	32	1.90779	1.39779	2.66669
Vomiting, Anticipatory	4	2	1	1.69423	1.46331	2.47919
Vomiting	253	120	68	1.60717	1.65842	2.66537
Voice Disorders	53	21	9	1.3426	1.25427	1.68397
Vocal Cord Paralysis	38	14	5	1.24838	1.04522	1.30483
Vitreous Hemorrhage	35	19	13	1.83945	2.00243	3.68336
Vitreous Detachment	12	7	5	1.9766	2.09045	4.13198
Vitreoretinopathy, Proliferative	109	63	39	1.95847	1.81172	3.54819
Vitiligo	171	78	50	1.54561	1.87604	2.89963
Vitamin K Deficiency	34	14	13	1.39525	2.71758	3.7917
Vitamin E Deficiency	140	77	47	1.86365	1.78638	3.32919
Vitamin D Deficiency	153	76	48	1.68316	1.84839	3.11113
Vitamin B Deficiency	30	17	11	1.92013	1.8937	3.63614
Vitamin B 6 Deficiency	71	40	23	1.90899	1.68281	3.21247
Vitamin B 12 Deficiency	79	45	27	1.93013	1.75597	3.38927
Vitamin A Deficiency	253	128	78	1.71432	1.78341	3.05734
Visna	11	9	9	2.77237	2.92662	8.1137
Vision, Low	22	13	11	2.00227	2.47637	4.95837
Vision Disorders	215	95	58	1.49723	1.78678	2.67521
Visceral Prolapse	1	1		3.38846
Virus Diseases	385	190	115	1.67223	1.77138	2.96214
Virilism	53	21	13	1.3426	1.81172	2.43241
Viremia	225	120	80	1.80718	1.95108	3.52595
Vipoma	32	19	13	2.0119	2.00243	4.02868
Vibrio Infections	55	26	20	1.60182	2.25125	3.60609
Vestibulocochlear Nerve Diseases	20	8	6	1.35538	2.19497	2.97502
Vestibular Neuronitis	10	7	1	2.37192	0.418089	0.991674
Vestibular Diseases	66	31	12	1.59155	1.13289	1.80304
Vesicular Exanthema of Swine	2	2	1	3.38846	1.46331	4.95837
Vesicovaginal Fistula	6
Vesico-Ureteral Reflux	70	29	16	1.40379	1.61469	2.26668
Vertigo	54	18	9	1.12949	1.46331	1.65279
Vertebrobasilar Insufficiency	30	13	8	1.46833	1.801	2.64446
Vertebral Artery Dissection	6	3	1	1.69423	0.975542	1.65279
Ventricular Septal Rupture	2	1	1	1.69423	2.92662	4.95837
Ventricular Premature Complexes	23	11	6	1.62057	1.59634	2.58698
Ventricular Outflow Obstruction	15	8	4	1.80718	1.46331	2.64446
Ventricular Fibrillation	177	77	42	1.47407	1.59634	2.35313
Ventricular Dysfunction, Right	46	23	16	1.69423	2.03591	3.4493
Ventricular Dysfunction, Left	259	140	84	1.8316	1.75597	3.21624
Ventricular Dysfunction	41	16	12	1.32232	2.19497	2.90246
Venous Thrombosis	155	76	46	1.66144	1.77138	2.94303
Venous Insufficiency	70	37	26	1.79104	2.05655	3.68336
Venereal Tumors, Veterinary	17	11	6	2.19253	1.59634	3.50003
Velopharyngeal Insufficiency	39	16	7	1.39014	1.2804	1.77993
Vasospasm, Intracranial	75	40	26	1.80718	1.90231	3.4378
Vasculitis, Hypersensitivity	44	18	15	1.38619	2.43885	3.38071
Vasculitis, Central Nervous System	9	6	4	2.25897	1.95108	4.40744
Vasculitis, Allergic Cutaneous	44	20	15	1.54021	2.19497	3.38071
Vasculitis	266	138	98	1.75792	2.07833	3.65354
Vascular Neoplasms	93	48	27	1.74888	1.64623	2.87905
Vascular Hemostatic Disorders	13	8	4	2.0852	1.46331	3.05131
Vascular Headaches	25	13	10	1.762	2.25125	3.9667
Vascular Fistula	7	4	3	1.93626	2.19497	4.25003
Varicose Veins	107	57	34	1.80507	1.74571	3.15111
Varicose Ulcer	86	43	35	1.69423	2.38214	4.03588
Varicocele	59	30	19	1.72294	1.85353	3.19353
Vagus Nerve Diseases	2	1	1	1.69423	2.92662	4.95837
Vaginosis, Bacterial	39	28	20	2.43274	2.09045	5.08551
Vaginitis	39	17	13	1.47702	2.23801	3.30558
Vaginal Neoplasms	86	51	32	2.00943	1.83631	3.68995
Vaginal Fistula	1	1		3.38846
Vaginal Diseases	53	26	16	1.66226	1.801	2.99373
Vaginal Discharge	10	7	5	2.37192	2.09045	4.95837
Vaccinia	115	67	44	1.97414	1.92196	3.79423
Uveoparotid Fever	1
Uveomeningoencephalitic Syndrome	50	28	19	1.89754	1.98592	3.76836
Uveitis, Suppurative	4	1	1	0.847114	2.92662	2.47919
Uveitis, Posterior	45	25	20	1.88248	2.3413	4.40744
Uveitis, Intermediate	14	5	4	1.21016	2.3413	2.83335
Uveitis, Anterior	125	68	48	1.84332	2.06585	3.80803
Uveitis	240	128	87	1.80718	1.98919	3.59482
Uveal Neoplasms	175	98	66	1.89754	1.97099	3.74003
Uveal Diseases	38	19	13	1.69423	2.00243	3.39257
Uterine Rupture	10	1	1	0.338846	2.92662	0.991674
Uterine Prolapse	40	21	14	1.77894	1.95108	3.47086
Uterine Perforation	12	2	2	0.564743	2.92662	1.65279
Uterine Inversion	1	1		3.38846
Uterine Inertia	5	2	1	1.35538	1.46331	1.98335
Uterine Hemorrhage	114	53	39	1.57534	2.15355	3.39257
Uterine Diseases	118	56	38	1.60808	1.98592	3.19353
Urticaria Pigmentosa	49	26	17	1.79796	1.91356	3.4405
Urticaria	187	90	53	1.63081	1.72346	2.81063
Urologic Neoplasms	122	69	40	1.91642	1.69659	3.25139
Urologic Diseases	78	30	19	1.30325	1.85353	2.41562
Urogenital Neoplasms	84	52	36	2.09762	2.02612	4.25003
Urogenital Diseases	54	28	16	1.75698	1.67236	2.93829
Urogenital Abnormalities	64	29	12	1.53539	1.21102	1.85939
Urination Disorders	65	30	20	1.5639	1.95108	3.05131
Urinary Tract Infections	271	117	70	1.46291	1.75097	2.56152
Urinary Retention	47	21	12	1.51399	1.67236	2.53193
Urinary Incontinence, Stress	59	25	18	1.43579	2.10717	3.02545
Urinary Incontinence	90	40	25	1.50598	1.82914	2.75465
Urinary Fistula	12	4	2	1.12949	1.46331	1.65279
Urinary Calculi	132	55	37	1.41186	1.96882	2.77969
Urethritis	48	26	14	1.83541	1.57587	2.89238
Urethral Stricture	14	6	2	1.4522	0.975542	1.41668
Urethral Obstruction	47	16	14	1.15352	2.5608	2.95392
Urethral Neoplasms	31	15	11	1.63958	2.14619	3.51884
Urethral Diseases	32	10	4	1.05889	1.17065	1.23959
Ureterocele	3
Ureteral Obstruction	241	128	84	1.79968	1.9206	3.45646
Ureteral Neoplasms	57	34	18	2.02118	1.54939	3.1316
Ureteral Diseases	23	9	6	1.32592	1.95108	2.58698
Ureteral Calculi	36	10	6	0.941238	1.75597	1.65279
Uremia	430	245	141	1.93063	1.6843	3.25177
Ureaplasma Infections	18	9	9	1.69423	2.92662	4.95837
Urachal Cyst	5	1	1	0.677691	2.92662	1.98335
Upper Extremity Deformities, Congenital	3	1		1.12949
Unverricht-Lundborg Syndrome	8	6	4	2.54134	1.95108	4.95837
Uniparental Disomy	30	11	7	1.24243	1.8624	2.31391
Unconsciousness	52	27	20	1.75939	2.16787	3.81413
Ulnar Neuropathies	4	3	1	2.54134	0.975542	2.47919
Ulnar Nerve Compression Syndromes	4	1	1	0.847114	2.92662	2.47919
Ulna Fractures	13	4	2	1.0426	1.46331	1.52565
Ulcer	130	68	39	1.77242	1.67851	2.97502
Tyrosinemias	10	9	3	3.04961	0.975542	2.97502
Typhus, Epidemic Louse-Borne	15	8	6	1.80718	2.19497	3.9667
Typhus, Endemic Flea-Borne	9	5	4	1.88248	2.3413	4.40744
Typhoid Fever	91	48	28	1.78732	1.7072	3.05131
Tympanic Membrane Perforation	17	9	6	1.79389	1.95108	3.50003
Twins, Conjoined	11	4	2	1.23217	1.46331	1.80304
Turner Syndrome	167	70	44	1.42031	1.83959	2.61279
Tumor Virus Infections	618	319	179	1.74906	1.64221	2.87232
Tumor Lysis Syndrome	19	9	6	1.60506	1.95108	3.1316
Tularemia	41	21	17	1.73555	2.36917	4.11182
Tuberous Sclerosis	196	102	56	1.76338	1.60677	2.83335
Tuberculosis, Urogenital	7	3	1	1.4522	0.975542	1.41668
Tuberculosis, Splenic	9	5	2	1.88248	1.17065	2.20372
Tuberculosis, Spinal	20	11	8	1.86365	2.12845	3.9667
Tuberculosis, Renal	11	5	3	1.54021	1.75597	2.70457
Tuberculosis, Pulmonary	366	202	120	1.87013	1.73859	3.25139
Tuberculosis, Pleural	78	39	25	1.69423	1.87604	3.17844
Tuberculosis, Osteoarticular	18	12	8	2.25897	1.95108	4.40744
Tuberculosis, Oral	3	2	2	2.25897	2.92662	6.61116
Tuberculosis, Ocular	4	3	1	2.54134	0.975542	2.47919
Tuberculosis, Multidrug-Resistant	31	18	10	1.96749	1.6259	3.19895
Tuberculosis, Miliary	32	16	9	1.69423	1.64623	2.78908
Tuberculosis, Meningeal	63	32	16	1.72112	1.46331	2.51854
Tuberculosis, Male Genital	3	1		1.12949
Tuberculosis, Lymph Node	36	23	15	2.16485	1.90867	4.13198
Tuberculosis, Laryngeal	4	2		1.69423
Tuberculosis, Hepatic	16	8	6	1.69423	2.19497	3.71878
Tuberculosis, Gastrointestinal	12	8	5	2.25897	1.82914	4.13198
Tuberculosis, Female Genital	6	2	2	1.12949	2.92662	3.30558
Tuberculosis, Endocrine	3	1	1	1.12949	2.92662	3.30558
Tuberculosis, Cutaneous	24	18	12	2.54134	1.95108	4.95837
Tuberculosis, Cardiovascular	4	4	3	3.38846	2.19497	7.43756
Tuberculosis, Bovine	46	23	18	1.69423	2.2904	3.88046
Tuberculosis, Avian	2	2	2	3.38846	2.92662	9.91674
Tuberculosis	400	218	126	1.84671	1.69154	3.12377
Tuberculoma, Intracranial	4	1	1	0.847114	2.92662	2.47919
Tuberculoma	28	17	11	2.05728	1.8937	3.89586
Trypanosomiasis, Bovine	46	24	17	1.76789	2.07303	3.66488
Trypanosomiasis, African	176	91	57	1.75199	1.83316	3.21167
Trypanosomiasis	81	41	29	1.71514	2.07005	3.55044
Truncus Arteriosus, Persistent	18	7	4	1.31773	1.67236	2.20372
Trophoblastic Tumor, Placental Site	24	7	4	0.9883	1.67236	1.65279
Trophoblastic Neoplasms	125	61	40	1.65357	1.9191	3.17336
Trombiculiasis	3	1	1	1.12949	2.92662	3.30558
Trochlear Nerve Diseases	4	2	1	1.69423	1.46331	2.47919
Trisomy	465	236	145	1.71973	1.79814	3.09232
Trismus	12	3	2	0.847114	1.95108	1.65279
Trigeminal Neuralgia	44	20	11	1.54021	1.60964	2.47919
Trigeminal Nerve Diseases	6	2	2	1.12949	2.92662	3.30558
Tricuspid Valve Stenosis	6	2		1.12949
Tricuspid Valve Prolapse	1
Tricuspid Valve Insufficiency	33	10	8	1.02681	2.3413	2.40406
Tricuspid Atresia	9	4	2	1.50598	1.46331	2.20372
Trichuriasis	44	20	13	1.54021	1.90231	2.92995
Trichotillomania	4	2	2	1.69423	2.92662	4.95837
Trichostrongylosis	42	23	16	1.85558	2.03591	3.77781
Trichostrongyloidiasis	50	35	27	2.37192	2.25768	5.35504
Trichomonas Vaginitis	28	14	12	1.69423	2.50854	4.25003
Trichomonas Infections	19	10	8	1.7834	2.3413	4.17547
Trichinosis	137	74	39	1.83026	1.54241	2.82301
Treponemal Infections	35	23	17	2.2267	2.16316	4.8167
Trench Fever	6	4	3	2.25897	2.19497	4.95837
Tremor	214	102	64	1.61506	1.83631	2.96575
Trematode Infections	53	28	17	1.79013	1.77688	3.18084
Trauma, Nervous System	26	14	8	1.82455	1.67236	3.05131
Transvestism	3	1		1.12949
Transsexualism	48	23	15	1.62364	1.90867	3.09898
Transposition of Great Vessels	45	19	12	1.43068	1.84839	2.64446
Translocation, Genetic	1789	909	487	1.72169	1.56795	2.69953
Trachoma	30	17	13	1.92013	2.23801	4.29725
Tracheoesophageal Fistula	29	15	6	1.75265	1.17065	2.05174
Tracheobronchomegaly	3
Tracheitis	25	13	10	1.762	2.25125	3.9667
Tracheal Stenosis	45	19	9	1.43068	1.3863	1.98335
Tracheal Neoplasms	53	36	28	2.30159	2.27626	5.23903
Tracheal Diseases	45	23	13	1.73188	1.65418	2.86484
Toxoplasmosis, Ocular	37	20	13	1.8316	1.90231	3.48426
Toxoplasmosis, Congenital	31	20	15	2.1861	2.19497	4.79842
Toxoplasmosis, Cerebral	62	36	26	1.96749	2.11367	4.15863
Toxoplasmosis, Animal	176	102	65	1.96376	1.86501	3.66243
Toxoplasmosis	171	97	67	1.92211	2.02148	3.88551
Toxocariasis	37	20	15	1.8316	2.19497	4.0203
Toxemia	62	36	28	1.96749	2.27626	4.47853
Tourette Syndrome	87	35	19	1.36317	1.58874	2.16573
Torticollis	41	13	9	1.07439	2.02612	2.17685
Torsion	51	22	10	1.46169	1.33028	1.94446
Torsades de Pointes	25	8	4	1.08431	1.46331	1.58668
Torovirus Infections	1	1	1	3.38846	2.92662	9.91674
Toothache	33	17	10	1.74557	1.72154	3.00507
Tooth, Unerupted	19	9	4	1.60506	1.30072	2.08774
Tooth, Supernumerary	16	4	2	0.847114	1.46331	1.23959
Tooth, Nonvital	11	5	3	1.54021	1.75597	2.70457
Tooth, Impacted	29	16	8	1.86949	1.46331	2.73565
Tooth Resorption	11	2	1	0.616083	1.46331	0.901522
Tooth Mobility	35	16	11	1.54901	2.01205	3.11669
Tooth Migration	14	8	7	1.93626	2.5608	4.95837
Tooth Loss	42	17	10	1.37152	1.72154	2.36113
Tooth Injuries	25	5	5	0.677691	2.92662	1.98335
Tooth Fractures	38	17	10	1.51589	1.72154	2.60967
Tooth Eruption, Ectopic	6	4		2.25897
Tooth Erosion	23	9	5	1.32592	1.6259	2.15581
Tooth Diseases	64	28	19	1.48245	1.98592	2.94403
Tooth Discoloration	30	13	6	1.46833	1.35075	1.98335
Tooth Demineralization	31	17	13	1.85819	2.23801	4.15863
Tooth Avulsion	11	3	1	0.924125	0.975542	0.901522
Tooth Attrition	16	5	3	1.05889	1.75597	1.85939
Tooth Ankylosis	2	1	1	1.69423	2.92662	4.95837
Tooth Abrasion	36	20	12	1.88248	1.75597	3.30558
Tooth Abnormalities	83	39	21	1.59217	1.57587	2.50906
Tonsillitis	105	53	36	1.71036	1.9879	3.40003
Tonsillar Neoplasms	60	31	21	1.7507	1.98255	3.47086
Tongue, Fissured	7	3	2	1.4522	1.95108	2.83335
Tongue Neoplasms	213	124	82	1.97262	1.93535	3.81771
Tongue Diseases	41	18	13	1.48762	2.11367	3.14433
Togaviridae Infections	42	23	15	1.85558	1.90867	3.54169
Tobacco Use Disorder	66	28	21	1.43753	2.19497	3.15533
T-Lymphocytopenia, Idiopathic CD4-Positive	21	8	7	1.29084	2.5608	3.30558
Tinnitus	52	22	11	1.43358	1.46331	2.09777
Tinea Versicolor	17	9	7	1.79389	2.27626	4.08336
Tinea Pedis	12	8	7	2.25897	2.5608	5.78477
Tinea Capitis	5	3	2	2.03307	1.95108	3.9667
Tinea	35	18	13	1.74263	2.11367	3.68336
Tietze's Syndrome	2	1	1	1.69423	2.92662	4.95837
Tics	9	1	1	0.376495	2.92662	1.10186
Tick-Borne Diseases	24	13	8	1.83541	1.801	3.30558
Tick Toxicoses	2	1		1.69423
Tick Paralysis	3
Tick Infestations	57	26	13	1.54561	1.46331	2.26171
Tic Disorders	18	5	3	0.941238	1.75597	1.65279
Tibial Neuropathy	6	3	1	1.69423	0.975542	1.65279
Tibial Fractures	103	61	37	2.00676	1.77517	3.56232
Thyrotoxicosis	80	30	20	1.27067	1.95108	2.47919
Thyroiditis, Suppurative	3	3	3	3.38846	2.92662	9.91674
Thyroiditis, Subacute	29	16	12	1.86949	2.19497	4.10348
Thyroiditis, Autoimmune	324	178	116	1.86156	1.90724	3.55044
Thyroiditis	109	53	38	1.6476	2.09833	3.45721
Thyroid Nodule	76	37	18	1.64964	1.42376	2.3487
Thyroid Neoplasms	823	457	259	1.88156	1.65863	3.12082
Thyroid Hormone Resistance Syndrome	33	13	6	1.33485	1.35075	1.80304
Thyroid Crisis	13	6	5	1.5639	2.43885	3.81413
Thyroglossal Cyst	5
Thymus Neoplasms	494	263	152	1.80398	1.69143	3.05131
Thymus Hyperplasia	66	33	26	1.69423	2.30583	3.9066
Thymoma	442	242	145	1.85522	1.75356	3.25323
Thrombosis	490	248	154	1.71497	1.81734	3.11669
Thrombophlebitis	164	84	51	1.73555	1.77688	3.08386
Thrombophilia	137	69	44	1.7066	1.86625	3.18494
Thromboembolism	188	95	59	1.71225	1.81759	3.11217
Thrombocytosis	140	61	43	1.4764	2.06303	3.04586
Thrombocytopenia	460	254	153	1.87102	1.76289	3.29839
Thrombocythemia, Hemorrhagic	122	67	40	1.86087	1.74724	3.25139
Thromboangiitis Obliterans	55	26	19	1.60182	2.13869	3.42578
Thrombasthenia	98	49	27	1.69423	1.61263	2.73216
Thoracic Outlet Syndrome	6	2		1.12949
Thoracic Neoplasms	130	70	46	1.82455	1.92321	3.509
Thoracic Injuries	58	25	13	1.46054	1.52184	2.22272
Thoracic Diseases	34	15	13	1.49491	2.53641	3.7917
Thinness	106	52	30	1.66226	1.68844	2.80662
Thiamine Deficiency	65	34	21	1.77242	1.80762	3.20387
Theileriasis	77	44	33	1.93626	2.19497	4.25003
Thecoma	47	21	14	1.51399	1.95108	2.95392
Thanatophoric Dysplasia	28	18	7	2.17829	1.13813	2.47919
Thalassemia	256	130	78	1.7207	1.75597	3.02151
Thalamic Diseases	17	7	2	1.39525	0.836178	1.16668
Tetralogy of Fallot	89	43	22	1.63712	1.49734	2.45133
Tetany	48	22	13	1.55304	1.72937	2.68578
Tetanus	62	29	13	1.58492	1.31194	2.07932
Testicular Neoplasms	618	341	203	1.86968	1.74224	3.25744
Testicular Diseases	108	53	38	1.66285	2.09833	3.48922
Teratoma	556	293	173	1.78564	1.72801	3.0856
Teratocarcinoma	346	185	112	1.81175	1.77179	3.21004
Tension Headache	32	15	12	1.58834	2.3413	3.71878
Tenosynovitis	19	11	7	1.96174	1.8624	3.65354
Tennis Elbow	13	5	4	1.30325	2.3413	3.05131
Tendon Injuries	60	29	14	1.63775	1.41285	2.31391
Tendinitis	47	22	15	1.58609	1.99543	3.16492
Temporomandibular Joint Dysfunction Syndrome	33	12	8	1.23217	1.95108	2.40406
Temporomandibular Joint Disorders	103	55	35	1.80937	1.8624	3.36977
Temporal Arteritis	115	59	38	1.73843	1.88494	3.27684
Telangiectasis	69	30	18	1.47324	1.75597	2.58698
Telangiectasia, Hereditary Hemorrhagic	39	19	10	1.65079	1.54033	2.54275
Tay-Sachs Disease	48	31	23	2.18838	2.17137	4.75177
Tauopathies	20	14	7	2.37192	1.46331	3.47086
Taste Disorders	18	7	4	1.31773	1.67236	2.20372
Tarsal Tunnel Syndrome	4	1		0.847114
Tangier Disease	69	42	28	2.06254	1.95108	4.02418
Takayasu's Arteritis	94	53	35	1.91051	1.93268	3.6924
Taeniasis	43	24	19	1.89123	2.31691	4.38182
Tachycardia, Ventricular	131	49	25	1.26744	1.49318	1.89251
Tachycardia, Supraventricular	47	18	15	1.29771	2.43885	3.16492
Tachycardia, Sinus	9	5	4	1.88248	2.3413	4.40744
Tachycardia, Sinoatrial Nodal Reentry	2	1	1	1.69423	2.92662	4.95837
Tachycardia, Paroxysmal	22	6	5	0.924125	2.43885	2.2538
Tachycardia, Ectopic Junctional	4	2	2	1.69423	2.92662	4.95837
Tachycardia, Ectopic Atrial	10	2	2	0.677691	2.92662	1.98335
Tachycardia, Atrioventricular Nodal Reentry	20	8	8	1.35538	2.92662	3.9667
Tachycardia	189	82	49	1.47012	1.74884	2.57101
Tabes Dorsalis	5	5	4	3.38846	2.3413	7.93339
Syringomyelia	45	23	10	1.73188	1.27245	2.20372
Syringoma	16	7	6	1.48245	2.50854	3.71878
Syphilis, Latent	7	4	3	1.93626	2.19497	4.25003
Syphilis, Cutaneous	14	9	3	2.17829	0.975542	2.12502
Syphilis, Congenital	25	13	10	1.762	2.25125	3.9667
Syphilis, Cardiovascular	3	2		2.25897
Syphilis	120	63	39	1.77894	1.81172	3.22294
Synovitis, Pigmented Villonodular	54	37	22	2.32172	1.74016	4.04015
Synovitis	237	125	82	1.78716	1.91987	3.43111
Synovial Cyst	13	8	4	2.0852	1.46331	3.05131
Synostosis	22	6	1	0.924125	0.487771	0.450761
Syndrome	1722	816	426	1.60568	1.52787	2.45327
Syndactyly	100	38	19	1.28761	1.46331	1.88418
Syncope, Vasovagal	20	8	5	1.35538	1.82914	2.47919
Syncope	66	28	11	1.43753	1.14975	1.65279
Swine Vesicular Disease	8	7	5	2.9649	2.09045	6.19796
Swine Erysipelas	5	2	2	1.35538	2.92662	3.9667
Sweet's Syndrome	16	6	5	1.27067	2.43885	3.09898
Sweating, Gustatory	4
Sweat Gland Neoplasms	86	53	36	2.08824	1.9879	4.15119
Sweat Gland Diseases	15	8	5	1.80718	1.82914	3.30558
Swayback	3	1	1	1.12949	2.92662	3.30558
Surgical Wound Infection	143	67	39	1.5876	1.70356	2.70457
Surgical Wound Dehiscence	48	18	13	1.27067	2.11367	2.68578
Supratentorial Neoplasms	82	49	28	2.02481	1.67236	3.3862
Supranuclear Palsy, Progressive	82	49	21	2.02481	1.25427	2.53965
Suppuration	57	26	19	1.54561	2.13869	3.30558
Superior Vena Cava Syndrome	26	12	9	1.5639	2.19497	3.43272
Superior Mesenteric Artery Syndrome	4	1	1	0.847114	2.92662	2.47919
Superinfection	68	35	20	1.74406	1.67236	2.91669
Sunburn	76	45	26	2.00632	1.69094	3.39257
Sulfhemoglobinemia	1
Sudden Infant Death	131	70	38	1.81063	1.58874	2.87661
Substance-Related Disorders	410	199	122	1.64464	1.79421	2.95084
Substance Withdrawal Syndrome	392	186	117	1.60779	1.84094	2.95984
Substance Abuse, Intravenous	143	77	46	1.82455	1.74837	3.19
Subphrenic Abscess	2	1	1	1.69423	2.92662	4.95837
Submandibular Gland Neoplasms	62	31	21	1.69423	1.98255	3.3589
Submandibular Gland Diseases	15	6	5	1.35538	2.43885	3.30558
Sublingual Gland Neoplasms	6	4	3	2.25897	2.19497	4.95837
Subdural Effusion	12	7	6	1.9766	2.50854	4.95837
Subcutaneous Emphysema	7	3	3	1.4522	2.92662	4.25003
Subclavian Steal Syndrome	5	1	1	0.677691	2.92662	1.98335
Subarachnoid Hemorrhage, Traumatic	2
Subarachnoid Hemorrhage	213	122	76	1.94081	1.82314	3.53837
Subacute Sclerosing Panencephalitis	75	46	29	2.07825	1.84505	3.83447
Stuttering	20	9	6	1.52481	1.95108	2.97502
Sturge-Weber Syndrome	11	4	2	1.23217	1.46331	1.80304
Struma Ovarii	15	8	7	1.80718	2.5608	4.62781
Strongyloidiasis	42	23	16	1.85558	2.03591	3.77781
Strongylida Infections	124	65	49	1.77621	2.20622	3.91871
Strongyle Infections, Equine	11	8	4	2.46433	1.46331	3.60609
Striatonigral Degeneration	13	9	4	2.34585	1.30072	3.05131
Stress Disorders, Traumatic, Acute	1	1	1	3.38846	2.92662	9.91674
Stress Disorders, Traumatic	1	1	1	3.38846	2.92662	9.91674
Stress Disorders, Post-Traumatic	96	44	25	1.55304	1.66285	2.58248
Stress	1040	587	339	1.91252	1.69016	3.23248
Streptococcal Infections	340	170	107	1.69423	1.84205	3.12086
Strabismus	59	22	13	1.26349	1.72937	2.18504
Stomatognathic Diseases	3	2	2	2.25897	2.92662	6.61116
Stomatitis, Herpetic	15	6	5	1.35538	2.43885	3.30558
Stomatitis, Denture	24	11	9	1.55304	2.39451	3.71878
Stomatitis, Aphthous	72	37	27	1.74129	2.13565	3.71878
Stomatitis	131	70	39	1.81063	1.63055	2.95231
Stomach Volvulus	7	2	1	0.968131	1.46331	1.41668
Stomach Ulcer	322	180	110	1.89417	1.78849	3.38771
Stomach Rupture	3
Stomach Neoplasms	1289	681	386	1.79018	1.65885	2.96964
Stomach Diseases	182	98	65	1.82455	1.94113	3.54169
Still's Disease, Adult-Onset	34	19	15	1.89355	2.31049	4.37503
Stiff-Person Syndrome	31	12	6	1.31166	1.46331	1.91937
Stevens-Johnson Syndrome	34	17	15	1.69423	2.58232	4.37503
Stereotypic Movement Disorder	17	10	8	1.99321	2.3413	4.6667
Steatitis	9	2	2	0.75299	2.92662	2.20372
Status Epilepticus	158	89	47	1.90869	1.54552	2.94992
Status Asthmaticus	33	12	10	1.23217	2.43885	3.00507
Starvation	385	224	124	1.97147	1.6201	3.19396
Staphylococcal Skin Infections	28	12	8	1.4522	1.95108	2.83335
Staphylococcal Scalded Skin Syndrome	11	6	5	1.84825	2.43885	4.50761
Staphylococcal Infections	415	207	113	1.69015	1.59763	2.70022
Staphylococcal Food Poisoning	13	6	4	1.5639	1.95108	3.05131
Sprue, Tropical	13	6	4	1.5639	1.95108	3.05131
Sprains and Strains	32	16	9	1.69423	1.64623	2.78908
Sporotrichosis	20	11	6	1.86365	1.59634	2.97502
Spondylolysis	18	7	6	1.31773	2.50854	3.30558
Spondylolisthesis	26	10	8	1.30325	2.3413	3.05131
Spondylitis, Ankylosing	245	131	86	1.81179	1.9213	3.48098
Spondylitis	40	22	17	1.86365	2.26148	4.21462
Spondylarthropathies	49	30	21	2.07457	2.04864	4.25003
Spondylarthritis	13	5	5	1.30325	2.92662	3.81413
Splenosis	1
Splenomegaly	299	160	105	1.81322	1.9206	3.48247
Splenic Rupture	25	11	8	1.49092	2.12845	3.17336
Splenic Infarction	8	2	1	0.847114	1.46331	1.23959
Splenic Diseases	109	60	42	1.86521	2.04864	3.82113
Spirurida Infections	7	4	3	1.93626	2.19497	4.25003
Spirochaetales Infections	34	18	11	1.79389	1.78849	3.20836
Spinocerebellar Degenerations	140	59	29	1.42799	1.43851	2.05418
Spinocerebellar Ataxias	82	27	15	1.11571	1.6259	1.81404
Spinal Stenosis	43	14	9	1.10322	1.8814	2.0756
Spinal Osteophytosis	55	22	12	1.35538	1.59634	2.16365
Spinal Neoplasms	127	53	33	1.41408	1.82224	2.57679
Spinal Muscular Atrophies of Childhood	59	32	22	1.83781	2.01205	3.69777
Spinal Injuries	58	27	20	1.57739	2.16787	3.41957
Spinal Fractures	81	40	26	1.67331	1.90231	3.18315
Spinal Dysraphism	106	51	31	1.6303	1.77893	2.90018
Spinal Diseases	172	76	49	1.49723	1.8869	2.82512
Spinal Curvatures	5	2	2	1.35538	2.92662	3.9667
Spinal Cord Neoplasms	126	63	39	1.69423	1.81172	3.06947
Spinal Cord Ischemia	26	14	12	1.82455	2.50854	4.57696
Spinal Cord Injuries	462	241	147	1.76757	1.78512	3.15533
Spinal Cord Diseases	175	86	52	1.66518	1.76959	2.94669
Spinal Cord Compression	107	48	28	1.52006	1.7072	2.59504
Spina Bifida Occulta	36	20	15	1.88248	2.19497	4.13198
Spina Bifida Cystica	5	3	1	2.03307	0.975542	1.98335
Sphingolipidoses	17	10	7	1.99321	2.04864	4.08336
Spherocytosis, Hereditary	81	35	24	1.46415	2.00683	2.93829
Sphenoid Sinusitis	4	1	1	0.847114	2.92662	2.47919
Spermatocele	7	5	5	2.42033	2.92662	7.08339
Spermatic Cord Torsion	26	14	11	1.82455	2.29949	4.19554
Speech Disorders	94	39	20	1.40585	1.50083	2.10995
Spastic Paraplegia, Hereditary	65	26	11	1.35538	1.23819	1.67822
Spasms, Infantile	92	41	24	1.51007	1.71315	2.58698
Spasm	77	38	18	1.67223	1.3863	2.3182
Sparganosis	11	7	4	2.15629	1.67236	3.60609
Space Motion Sickness	11	8	4	2.46433	1.46331	3.60609
Somnambulism	6	2	1	1.12949	1.46331	1.65279
Somatostatinoma	24	12	8	1.69423	1.95108	3.30558
Somatosensory Disorders	17	6	2	1.19593	0.975542	1.16668
Somatoform Disorders	70	27	17	1.30698	1.84269	2.40835
Soft Tissue Neoplasms	441	233	132	1.79027	1.658	2.96828
Soft Tissue Injuries	41	21	12	1.73555	1.67236	2.90246
Soft Tissue Infections	24	13	8	1.83541	1.801	3.30558
Snoring	36	16	8	1.50598	1.46331	2.20372
Sneezing	38	18	13	1.60506	2.11367	3.39257
Sneddon Syndrome	9	7	4	2.63547	1.67236	4.40744
Snake Bites	61	33	22	1.8331	1.95108	3.57653
Smooth Muscle Tumor	19	12	9	2.14008	2.19497	4.6974
Smoke Inhalation Injury	25	9	6	1.21984	1.95108	2.38002
Smith-Lemli-Opitz Syndrome	40	22	14	1.86365	1.8624	3.47086
Smallpox	12	4	4	1.12949	2.92662	3.30558
Slow Virus Diseases	12	6	4	1.69423	1.95108	3.30558
Sleep Paralysis	1	1		3.38846
Sleep Initiation and Maintenance Disorders	81	33	16	1.38048	1.41897	1.95886
Sleep Disorders, Intrinsic	1
Sleep Disorders, Circadian Rhythm	16	10	5	2.11779	1.46331	3.09898
Sleep Disorders	126	57	30	1.53287	1.54033	2.36113
Sleep Deprivation	178	92	47	1.75134	1.49512	2.61847
Sleep Bruxism	8	2		0.847114
Sleep Arousal Disorders	3	2	1	2.25897	1.46331	3.30558
Sleep Apnea, Obstructive	61	27	15	1.49981	1.6259	2.43854
Sleep Apnea, Central	16	9	4	1.90601	1.30072	2.47919
Sleep Apnea Syndromes	152	76	38	1.69423	1.46331	2.47919
Skull Neoplasms	82	37	23	1.52894	1.81925	2.78153
Skull Fractures	48	18	10	1.27067	1.6259	2.06599
Skull Base Neoplasms	40	15	10	1.27067	1.95108	2.47919
Skin Ulcer	132	65	44	1.66856	1.9811	3.30558
Skin Neoplasms	1373	748	428	1.84601	1.67459	3.09131
Skin Manifestations	20	5	1	0.847114	0.585325	0.495837
Skin Diseases, Viral	33	19	18	1.95093	2.77259	5.40913
Skin Diseases, Vesiculobullous	111	57	36	1.74002	1.84839	3.21624
Skin Diseases, Vascular	47	20	16	1.4419	2.3413	3.37591
Skin Diseases, Parasitic	35	19	15	1.83945	2.31049	4.25003
Skin Diseases, Papulosquamous	42	18	16	1.4522	2.60144	3.77781
Skin Diseases, Metabolic	3	3	2	3.38846	1.95108	6.61116
Skin Diseases, Infectious	59	25	16	1.43579	1.87304	2.68929
Skin Diseases, Genetic	23	10	7	1.47324	2.04864	3.01814
Skin Diseases, Bacterial	33	15	13	1.54021	2.53641	3.9066
Skin Diseases	644	338	216	1.77841	1.87027	3.32611
Skin Abnormalities	114	48	27	1.42672	1.64623	2.3487
Sjogren's Syndrome	420	220	142	1.77491	1.889	3.3528
Sjogren-Larsson Syndrome	11	9	6	2.77237	1.95108	5.40913
Situs Inversus	37	15	6	1.3737	1.17065	1.60812
Sinusitis	152	70	46	1.56047	1.92321	3.00112
Sinus Thrombosis, Intracranial	38	15	10	1.33755	1.95108	2.60967
Sinoatrial Block	6	3	1	1.69423	0.975542	1.65279
Simian Acquired Immunodeficiency Syndrome	226	138	88	2.06906	1.86625	3.86139
Silicosis	98	45	29	1.55592	1.88605	2.93455
Signs and Symptoms	21	13	9	2.09762	2.02612	4.25003
Sigmoid Neoplasms	88	45	31	1.73273	2.01612	3.4934
Sigmoid Diseases	21	9	5	1.4522	1.6259	2.36113
Siderosis	27	14	7	1.75698	1.46331	2.57101
Sickle Cell Trait	93	43	29	1.56671	1.97377	3.09232
Sick Sinus Syndrome	29	12	5	1.40212	1.21943	1.70978
Sick Building Syndrome	19	5	3	0.891699	1.75597	1.5658
Sialorrhea	10	2	2	0.677691	2.92662	1.98335
Sialometaplasia, Necrotizing	2	1	1	1.69423	2.92662	4.95837
Sialic Acid Storage Disease	4	3	1	2.54134	0.975542	2.47919
Sialadenitis	109	65	44	2.02064	1.9811	4.00309
Shy-Drager Syndrome	30	14	6	1.58128	1.25427	1.98335
Shwartzman Phenomenon	45	28	17	2.10837	1.77688	3.74632
Shoulder Pain	20	7	5	1.18596	2.09045	2.47919
Shoulder Impingement Syndrome	15	6	3	1.35538	1.46331	1.98335
Shoulder Fractures	8	3	2	1.27067	1.95108	2.47919
Shoulder Dislocation	12	4	2	1.12949	1.46331	1.65279
Short Rib-Polydactyly Syndrome	5	2	1	1.35538	1.46331	1.98335
Short Bowel Syndrome	85	47	26	1.87362	1.61898	3.03336
Shock, Traumatic	55	25	19	1.54021	2.22423	3.42578
Shock, Surgical	15	7	6	1.58128	2.50854	3.9667
Shock, Hemorrhagic	199	110	71	1.87302	1.889	3.53813
Shock, Cardiogenic	62	34	21	1.85819	1.80762	3.3589
Shock	217	121	74	1.88942	1.78984	3.38175
Shared Paranoid Disorder	1
Sezary Syndrome	165	96	60	1.97147	1.82914	3.60609
Sexually Transmitted Diseases, Viral	32	12	8	1.27067	1.95108	2.47919
Sexually Transmitted Diseases, Bacterial	15	7	5	1.58128	2.09045	3.30558
Sexually Transmitted Diseases	134	70	43	1.77009	1.79778	3.18224
Sexual Dysfunctions, Psychological	35	13	7	1.25857	1.57587	1.98335
Sex Disorders	41	14	10	1.15703	2.09045	2.41872
Sex Differentiation Disorders	56	27	14	1.63372	1.51751	2.47919
Sex Cord-Gonadal Stromal Tumors	41	17	15	1.40497	2.58232	3.62808
Sex Chromosome Disorders	10	5	3	1.69423	1.75597	2.97502
Sex Chromosome Aberrations	287	119	60	1.40497	1.47561	2.07319
Severe Combined Immunodeficiency	282	163	104	1.95858	1.86729	3.65724
Severe Acute Respiratory Syndrome	17	8	6	1.59457	2.19497	3.50003
Setariasis	26	14	8	1.82455	1.67236	3.05131
Serum Sickness	38	21	17	1.87257	2.36917	4.43644
Sertoli-Leydig Cell Tumor	27	10	8	1.25498	2.3413	2.93829
Sertoli Cell Tumor	49	23	13	1.5905	1.65418	2.63097
Serratia Infections	32	17	13	1.80012	2.23801	4.02868
Serotonin Syndrome	12	3	2	0.847114	1.95108	1.65279
Serositis	22	13	10	2.00227	2.25125	4.50761
Septo-Optic Dysplasia	5	2	2	1.35538	2.92662	3.9667
Septicemia	294	142	96	1.6366	1.97856	3.23812
Sepsis Syndrome	128	71	44	1.87953	1.81368	3.40888
Sepsis	380	218	141	1.9439	1.89291	3.67963
Sensation Disorders	93	46	26	1.67601	1.65418	2.77242
Seminoma	192	109	69	1.92366	1.85263	3.56383
Self Mutilation	31	13	6	1.42097	1.35075	1.91937
Seizures, Febrile	68	30	19	1.49491	1.85353	2.77085
Seizures	819	407	224	1.68389	1.61072	2.71227
Sebaceous Gland Neoplasms	44	30	18	2.31031	1.75597	4.05685
Sebaceous Gland Diseases	1
Seasonal Affective Disorder	40	14	12	1.18596	2.50854	2.97502
Sea-Blue Histiocyte Syndrome	2
Scurvy	31	12	9	1.31166	2.19497	2.87905
Scrub Typhus	33	20	15	2.05361	2.19497	4.50761
Screw Worm Infection	2	2	1	3.38846	1.46331	4.95837
Scrapie	126	80	50	2.1514	1.82914	3.93521
Scotoma	37	13	5	1.19054	1.12562	1.3401
Scoliosis	140	56	33	1.35538	1.72462	2.33752
Sclerosis	225	108	64	1.62646	1.7343	2.82076
Scleroderma, Systemic	429	224	139	1.76926	1.81608	3.21312
Scleroderma, Localized	115	58	40	1.70896	2.01836	3.4493
Scleroderma, Limited	3	1		1.12949
Scleroderma, Diffuse	6	2	1	1.12949	1.46331	1.65279
Scleritis	30	16	12	1.80718	2.19497	3.9667
Sclerema Neonatorum	2	2	2	3.38846	2.92662	9.91674
Scleredema Adultorum	2	1	1	1.69423	2.92662	4.95837
Scleral Diseases	12	4	2	1.12949	1.46331	1.65279
Scimitar Syndrome	1
Sciatica	63	28	22	1.50598	2.29949	3.46299
Sciatic Neuropathy	96	55	32	1.9413	1.70276	3.30558
Schnitzler Syndrome	4	1	1	0.847114	2.92662	2.47919
Schizotypal Personality Disorder	23	4	2	0.589297	1.46331	0.862325
Schizophrenia, Paranoid	91	37	21	1.37772	1.66106	2.28848
Schizophrenia, Disorganized	24	9	8	1.27067	2.60144	3.30558
Schizophrenia, Childhood	23	9	8	1.32592	2.60144	3.4493
Schizophrenia, Catatonic	27	15	7	1.88248	1.36576	2.57101
Schizoid Personality Disorder	7
Schistosomiasis mansoni	283	149	92	1.78403	1.80704	3.22382
Schistosomiasis japonica	65	38	25	1.98094	1.92541	3.81413
Schistosomiasis haematobia	68	30	20	1.49491	1.95108	2.91669
Schistosomiasis	218	119	79	1.84966	1.94289	3.59368
Scheuermann's Disease	10	3	2	1.01654	1.95108	1.98335
Scarlet Fever	14	7	5	1.69423	2.09045	3.54169
Scalp Dermatoses	57	32	24	1.90229	2.19497	4.17547
Scabies	26	20	11	2.60651	1.60964	4.19554
Sarcoma, Yoshida	89	50	35	1.90363	2.04864	3.89984
Sarcoma, Synovial	147	81	50	1.86711	1.80656	3.37304
Sarcoma, Small Cell	31	18	13	1.96749	2.11367	4.15863
Sarcoma, Kaposi	368	202	128	1.85997	1.85449	3.4493
Sarcoma, Granulocytic	23	9	6	1.32592	1.95108	2.58698
Sarcoma, Experimental	561	303	175	1.83013	1.69029	3.09346
Sarcoma, Ewing's	381	208	121	1.84987	1.70251	3.14941
Sarcoma, Endometrial Stromal	32	15	10	1.58834	1.95108	3.09898
Sarcoma, Clear Cell	63	39	26	2.09762	1.95108	4.09262
Sarcoma, Avian	53	32	18	2.04586	1.64623	3.36795
Sarcoma, Alveolar Soft Part	29	18	11	2.10318	1.78849	3.76152
Sarcoma 37	3	2	2	2.25897	2.92662	6.61116
Sarcoma 180	157	94	53	2.02876	1.65012	3.34769
Sarcoma	562	306	183	1.84496	1.75024	3.22912
Sarcoidosis, Pulmonary	148	92	60	2.10634	1.90867	4.0203
Sarcoidosis	284	153	94	1.82547	1.79806	3.2823
Sarcocystosis	45	29	20	2.18367	2.01836	4.40744
Salpingitis	33	19	11	1.95093	1.69436	3.30558
Salmonella Infections, Animal	208	104	65	1.69423	1.82914	3.09898
Salmonella Infections	188	103	60	1.85644	1.70483	3.16492
Salmonella Food Poisoning	30	15	9	1.69423	1.75597	2.97502
Salivary Gland Fistula	2
Salivary Gland Diseases	72	40	30	1.88248	2.19497	4.13198
Salivary Gland Calculi	2
Salivary Duct Calculi	4	2	2	1.69423	2.92662	4.95837
Sagittal Sinus Thrombosis	5	3	2	2.03307	1.95108	3.9667
Sadism	1
Rupture, Spontaneous	128	65	42	1.7207	1.89105	3.25393
Rupture	106	58	40	1.85406	2.01836	3.74217
Rubulavirus Infections	13	9	8	2.34585	2.60144	6.10261
Rubinstein-Taybi Syndrome	18	6	4	1.12949	1.95108	2.20372
Rubella Syndrome, Congenital	11	2	1	0.616083	1.46331	0.901522
Rubella	93	46	33	1.67601	2.09954	3.51884
Rotavirus Infections	127	74	37	1.97438	1.46331	2.88913
Roseolovirus Infections	28	13	8	1.57321	1.801	2.83335
Rosacea	28	13	11	1.57321	2.47637	3.89586
Root Resorption	41	18	9	1.48762	1.46331	2.17685
Root Caries	22	13	11	2.00227	2.47637	4.95837
Romano-Ward Syndrome	3	1		1.12949
Rocky Mountain Spotted Fever	36	22	17	2.07072	2.26148	4.68291
RNA Virus Infections	12	9	7	2.54134	2.27626	5.78477
Ring Chromosomes	94	40	22	1.4419	1.60964	2.32094
Rinderpest	11	7	5	2.15629	2.09045	4.50761
Rigor Mortis	3	1	1	1.12949	2.92662	3.30558
Rift Valley Fever	9	7	6	2.63547	2.50854	6.61116
Rickettsiaceae Infections	16	10	8	2.11779	2.3413	4.95837
Rickettsia Infections	41	22	16	1.8182	2.12845	3.86995
Rickets	80	39	24	1.65187	1.801	2.97502
Riboflavin Deficiency	40	19	12	1.60952	1.84839	2.97502
Rib Fractures	25	11	8	1.49092	2.12845	3.17336
Rhinosporidiosis	7	4		1.93626
Rhinoscleroma	4
Rhinophyma	7	5	2	2.42033	1.17065	2.83335
Rhinitis, Vasomotor	11	3	2	0.924125	1.95108	1.80304
Rhinitis, Atrophic	18	6	3	1.12949	1.46331	1.65279
Rhinitis, Allergic, Perennial	196	104	69	1.79796	1.9417	3.4911
Rhinitis	147	75	50	1.7288	1.95108	3.37304
Rheumatoid Nodule	49	25	17	1.7288	1.9901	3.4405
Rheumatic Nodule	12	9	6	2.54134	1.95108	4.95837
Rheumatic Heart Disease	104	56	32	1.82455	1.67236	3.05131
Rheumatic Fever	82	43	30	1.77687	2.04183	3.62808
Rhabdoviridae Infections	97	58	34	2.02609	1.71561	3.47597
Rhabdomyosarcoma, Embryonal	74	45	25	2.06055	1.6259	3.35025
Rhabdomyosarcoma, Alveolar	95	56	31	1.99741	1.6201	3.23599
Rhabdomyosarcoma	471	247	143	1.77696	1.69436	3.01082
Rhabdomyoma	24	10	8	1.41186	2.3413	3.30558
Rhabdomyolysis	72	40	24	1.88248	1.75597	3.30558
Rhabdoid Tumor	100	55	38	1.86365	2.02203	3.76836
Rhabditida Infections	1	1	1	3.38846	2.92662	9.91674
Rh Isoimmunization	52	32	22	2.0852	2.01205	4.19554
Reye Syndrome	52	30	18	1.95488	1.75597	3.43272
Rett Syndrome	104	49	30	1.59648	1.79181	2.8606
Retroviridae Infections	302	152	90	1.70545	1.73287	2.95532
Retropneumoperitoneum	4	2	2	1.69423	2.92662	4.95837
Retropharyngeal Abscess	3	2	2	2.25897	2.92662	6.61116
Retroperitoneal Neoplasms	169	87	62	1.74435	2.08564	3.63809
Retroperitoneal Fibrosis	35	15	11	1.4522	2.14619	3.11669
Retrograde Degeneration	57	30	17	1.7834	1.65842	2.95762
Retrognathism	26	8	4	1.0426	1.46331	1.52565
Retrocochlear Diseases	2
Retrobulbar Hemorrhage	3
Retinoschisis	3
Retinopathy of Prematurity	71	30	14	1.43174	1.36576	1.95541
Retinitis Pigmentosa	307	149	80	1.64456	1.57134	2.58417
Retinitis	107	52	38	1.64673	2.13869	3.52183
Retinal Vein Occlusion	63	27	16	1.4522	1.7343	2.51854
Retinal Vasculitis	2
Retinal Perforations	49	25	18	1.7288	2.10717	3.64288
Retinal Neovascularization	104	51	29	1.66165	1.66416	2.76525
Retinal Necrosis Syndrome, Acute	14	7	6	1.69423	2.50854	4.25003
Retinal Hemorrhage	59	22	15	1.26349	1.99543	2.52121
Retinal Dysplasia	28	17	7	2.05728	1.20508	2.47919
Retinal Drusen	25	13	10	1.762	2.25125	3.9667
Retinal Diseases	371	185	117	1.68966	1.85089	3.12738
Retinal Detachment	183	92	64	1.70349	2.03591	3.46815
Retinal Degeneration	398	198	103	1.68571	1.52244	2.56639
Retinal Artery Occlusion	38	16	9	1.42672	1.64623	2.3487
Reticuloendotheliosis	55	30	23	1.84825	2.24375	4.147
Restless Legs Syndrome	33	13	6	1.33485	1.35075	1.80304
Respirovirus Infections	93	46	28	1.67601	1.78142	2.98569
Respiratory Tract Neoplasms	59	26	18	1.49322	2.02612	3.02545
Respiratory Tract Infections	326	158	94	1.64226	1.74116	2.85943
Respiratory Tract Fistula	6	4	3	2.25897	2.19497	4.95837
Respiratory Tract Diseases	200	102	61	1.72811	1.75024	3.02461
Respiratory System Abnormalities	18	10	7	1.88248	2.04864	3.85651
Respiratory Syncytial Virus Infections	144	80	43	1.88248	1.57306	2.96125
Respiratory Sounds	96	45	29	1.58834	1.88605	2.99568
Respiratory Paralysis	26	12	8	1.5639	1.95108	3.05131
Respiratory Insufficiency	240	114	64	1.60952	1.64302	2.64446
Respiratory Hypersensitivity	241	128	76	1.79968	1.73768	3.12727
Respiratory Distress Syndrome, Newborn	204	97	58	1.61118	1.74994	2.81947
Respiratory Distress Syndrome, Adult	277	153	91	1.8716	1.74067	3.25785
Respiration Disorders	106	56	41	1.79013	2.14271	3.83572
Reperfusion Injury	628	362	205	1.95322	1.65734	3.23715
Reoviridae Infections	68	39	28	1.94338	2.10117	4.08336
Renal Tubular Transport, Inborn Errors	16	5	2	1.05889	1.17065	1.23959
Renal Osteodystrophy	50	26	16	1.762	1.801	3.17336
Renal Artery Obstruction	114	52	31	1.54561	1.74472	2.69666
REM Sleep Parasomnias	1	1		3.38846
REM Sleep Behavior Disorder	8	5	2	2.11779	1.17065	2.47919
Relapsing Fever	29	19	17	2.22002	2.61856	5.81326
Reiter Disease	62	37	27	2.02214	2.13565	4.31858
Refsum Disease	36	21	13	1.9766	1.81172	3.58105
Refractive Errors	57	25	18	1.48617	2.10717	3.1316
Reflex, Babinski	7	3	2	1.4522	1.95108	2.83335
Reflex, Abnormal	124	61	36	1.6669	1.72719	2.87905
Reflex Sympathetic Dystrophy	41	22	14	1.8182	1.8624	3.3862
Red-Cell Aplasia, Pure	49	16	11	1.10643	2.01205	2.22621
Recurrence	1277	637	358	1.69025	1.64479	2.7801
Rectovaginal Fistula	5
Rectocele	1
Rectal Prolapse	13	4	2	1.0426	1.46331	1.52565
Rectal Neoplasms	469	249	143	1.79899	1.68075	3.02365
Rectal Fistula	23	10	6	1.47324	1.75597	2.58698
Rectal Diseases	78	33	22	1.43358	1.95108	2.79703
Reactive Attachment Disorder	1
Raynaud Disease	139	72	47	1.75517	1.91044	3.35314
Rat-Bite Fever	2	1		1.69423
Rare Diseases	3	1		1.12949
Ranula	1
Radius Fractures	32	15	7	1.58834	1.36576	2.16929
Radiodermatitis	35	22	17	2.12989	2.26148	4.8167
Radiculopathy	45	26	14	1.95778	1.57587	3.08521
Radicular Cyst	63	36	26	1.93626	2.11367	4.09262
Radiation Pneumonitis	43	26	21	2.04883	2.36381	4.84306
Radiation Injuries, Experimental	288	151	82	1.77659	1.58929	2.82352
Radiation Injuries	253	122	82	1.63396	1.96708	3.21412
Radial Neuropathy	1	1		3.38846
Rabies	89	51	32	1.9417	1.83631	3.56557
Quadriplegia	126	66	37	1.77491	1.64068	2.91206
Q Fever	51	29	20	1.92677	2.01836	3.88892
Pyuria	22	7	6	1.07815	2.50854	2.70457
Pyruvate Metabolism, Inborn Errors	8	4	2	1.69423	1.46331	2.47919
Pyruvate Dehydrogenase Complex Deficiency Disease	36	16	10	1.50598	1.82914	2.75465
Pyruvate Carboxylase Deficiency Disease	15	10	4	2.25897	1.17065	2.64446
Pyoderma Gangrenosum	24	12	10	1.69423	2.43885	4.13198
Pyoderma	26	13	8	1.69423	1.801	3.05131
Pyloric Stenosis	57	28	17	1.66451	1.77688	2.95762
Pyelonephritis, Xanthogranulomatous	2	2	1	3.38846	1.46331	4.95837
Pyelonephritis	161	81	54	1.70475	1.95108	3.32611
Pyelitis	5	2		1.35538
Purpura, Thrombotic Thrombocytopenic	72	32	22	1.50598	2.01205	3.03012
Purpura, Thrombocytopenic, Idiopathic	139	60	42	1.46264	2.04864	2.99643
Purpura, Thrombocytopenic	124	62	40	1.69423	1.88814	3.19895
Purpura, Schoenlein-Henoch	99	48	32	1.64289	1.95108	3.20541
Purpura, Hyperglobulinemic	8	2	2	0.847114	2.92662	2.47919
Purpura	95	53	37	1.8904	2.04312	3.86231
Purine-Pyrimidine Metabolism, Inborn Errors	44	23	13	1.77124	1.65418	2.92995
Pupil Disorders	15	6	4	1.35538	1.95108	2.64446
Pulpitis	63	37	29	1.99005	2.29384	4.56485
Pulmonary Veno-Occlusive Disease	13	6	4	1.5639	1.95108	3.05131
Pulmonary Valve Stenosis	39	10	4	0.868835	1.17065	1.0171
Pulmonary Valve Insufficiency	8	3	3	1.27067	2.92662	3.71878
Pulmonary Subvalvular Stenosis	1	1		3.38846
Pulmonary Heart Disease	43	18	9	1.41842	1.46331	2.0756
Pulmonary Fibrosis	413	230	145	1.88703	1.84505	3.48166
Pulmonary Eosinophilia	148	79	50	1.8087	1.85229	3.35025
Pulmonary Emphysema	159	75	50	1.59833	1.95108	3.11847
Pulmonary Embolism	192	84	47	1.48245	1.63752	2.42754
Pulmonary Edema	267	129	82	1.63712	1.86034	3.04559
Pulmonary Disease, Chronic Obstructive	150	75	49	1.69423	1.91206	3.23947
Pulmonary Blastoma	16	12	8	2.54134	1.95108	4.95837
Pulmonary Atresia	8	2	2	0.847114	2.92662	2.47919
Pulmonary Alveolar Proteinosis	62	33	20	1.80353	1.77371	3.19895
Pulmonary Adenomatosis, Ovine	15	11	9	2.48487	2.39451	5.95004
Puerperal Infection	18	11	6	2.07072	1.59634	3.30558
Puerperal Disorders	137	65	45	1.60766	2.02612	3.25732
Puberty, Precocious	115	47	25	1.38485	1.55672	2.15581
Puberty, Delayed	56	22	13	1.33118	1.72937	2.3021
Pterygium	67	37	27	1.87124	2.13565	3.9963
Psychotic Disorders	235	108	62	1.55725	1.6801	2.61633
Psychoses, Substance-Induced	44	19	15	1.4632	2.31049	3.38071
Psychoses, Alcoholic	28	20	12	2.42033	1.75597	4.25003
Psychophysiologic Disorders	99	44	21	1.50598	1.3968	2.10355
Psychomotor Disorders	130	61	34	1.58997	1.63123	2.59361
Psychomotor Agitation	42	15	12	1.21016	2.3413	2.83335
Psoas Abscess	8	5	4	2.11779	2.3413	4.95837
Pseudoxanthoma Elasticum	28	10	6	1.21016	1.75597	2.12502
Pseudotumor Cerebri	50	21	10	1.42315	1.39363	1.98335
Pseudorabies	76	43	27	1.91715	1.83765	3.52305
Pseudopseudohypoparathyroidism	18	4	2	0.75299	1.46331	1.10186
Pseudophakia	9	3	3	1.12949	2.92662	3.30558
Pseudomyxoma Peritonei	11	7	6	2.15629	2.50854	5.40913
Pseudolymphoma	50	27	24	1.82977	2.60144	4.76004
Pseudohypoparathyroidism	51	23	12	1.52813	1.52693	2.33335
Pseudohypoaldosteronism	20	6	2	1.01654	0.975542	0.991674
Pseudohermaphroditism	69	30	19	1.47324	1.85353	2.7307
Pseudarthrosis	16	4	2	0.847114	1.46331	1.23959
Pruritus Vulvae	4	3	3	2.54134	2.92662	7.43756
Pruritus Ani	1
Pruritus	144	76	46	1.78835	1.77138	3.16785
Prurigo	48	21	19	1.48245	2.6479	3.92538
Prune Belly Syndrome	7	2	2	0.968131	2.92662	2.83335
Protozoan Infections, Animal	22	9	7	1.38619	2.27626	3.15533
Protozoan Infections	39	19	13	1.65079	2.00243	3.30558
Protoporphyria, Erythropoietic	4	3	3	2.54134	2.92662	7.43756
Proteus Syndrome	9	4	3	1.50598	2.19497	3.30558
Proteus Infections	40	17	13	1.44009	2.23801	3.22294
Proteinuria	582	303	183	1.76409	1.76757	3.11815
Protein-Losing Enteropathies	40	16	12	1.35538	2.19497	2.97502
Protein-Energy Malnutrition	217	111	59	1.73327	1.55559	2.69626
Protein S Deficiency	41	22	16	1.8182	2.12845	3.86995
Protein Deficiency	185	99	66	1.81328	1.95108	3.53786
Protein C Deficiency	61	39	27	2.16639	2.02612	4.38938
Prosthesis-Related Infections	65	32	22	1.66816	2.01205	3.35644
Prosthesis Failure	251	122	77	1.64698	1.84713	3.04219
Prostatitis	81	41	27	1.71514	1.92729	3.30558
Prostatic Diseases	59	35	18	2.0101	1.50512	3.02545
Prosopagnosia	2	1	1	1.69423	2.92662	4.95837
Prolapse	12	3	2	0.847114	1.95108	1.65279
Prolactinoma	149	75	43	1.7056	1.67793	2.86188
Prognathism	23	10	5	1.47324	1.46331	2.15581
Progeria	56	30	23	1.81524	2.24375	4.07295
Proctocolitis	21	15	12	2.42033	2.3413	5.66671
Proctitis	30	11	10	1.24243	2.66057	3.30558
Prion Diseases	99	63	38	2.15629	1.76527	3.80643
Priapism	17	7	5	1.39525	2.09045	2.91669
Presbyopia	11	5	3	1.54021	1.75597	2.70457
Presbycusis	41	17	10	1.40497	1.72154	2.41872
Prenatal Injuries	16	10	6	2.11779	1.75597	3.71878
Prenatal Exposure Delayed Effects	466	233	139	1.69423	1.74593	2.958
Premenstrual Syndrome	50	21	14	1.42315	1.95108	2.77669
Preleukemia	119	61	39	1.73694	1.87112	3.25002
Pregnancy, Tubal	50	25	17	1.69423	1.9901	3.37169
Pregnancy, Prolonged	36	21	11	1.9766	1.53299	3.03012
Pregnancy, Ectopic	79	36	23	1.54411	1.86979	2.88715
Pregnancy, Abdominal	4	2	2	1.69423	2.92662	4.95837
Pregnancy in Diabetics	256	136	77	1.80012	1.65699	2.98277
Pregnancy Complications, Parasitic	67	35	26	1.77009	2.17406	3.84829
Pregnancy Complications, Neoplastic	146	68	45	1.57819	1.93674	3.05653
Pregnancy Complications, Infectious	302	164	106	1.84009	1.8916	3.48071
Pregnancy Complications, Hematologic	146	65	44	1.50856	1.9811	2.98861
Pregnancy Complications, Cardiovascular	199	97	70	1.65166	2.112	3.4883
Pregnancy Complications	555	269	155	1.64233	1.68635	2.76954
Pre-Excitation, Mahaim-Type	1
Pre-Excitation Syndromes	9	5	4	1.88248	2.3413	4.40744
Pre-Eclampsia	410	220	137	1.8182	1.82249	3.31364
Prediabetic State	125	64	39	1.73489	1.78341	3.09402
Precancerous Conditions	766	414	236	1.83136	1.66832	3.05529
Prader-Willi Syndrome	133	59	33	1.50315	1.63693	2.46054
Poxviridae Infections	22	12	8	1.84825	1.95108	3.60609
Pouchitis	32	21	18	2.22367	2.50854	5.57817
Potassium Deficiency	83	45	29	1.83712	1.88605	3.46489
Postpoliomyelitis Syndrome	26	14	6	1.82455	1.25427	2.28848
Postphlebitic Syndrome	11	7	5	2.15629	2.09045	4.50761
Postpericardiotomy Syndrome	10	5	4	1.69423	2.3413	3.9667
Postpartum Hemorrhage	35	14	11	1.35538	2.29949	3.11669
Postoperative Nausea and Vomiting	18	10	8	1.88248	2.3413	4.40744
Postoperative Hemorrhage	70	37	25	1.79104	1.97745	3.54169
Postoperative Complications	945	467	278	1.67451	1.74219	2.91731
Postmortem Changes	249	135	71	1.83712	1.53919	2.82767
Postgastrectomy Syndromes	24	9	6	1.27067	1.95108	2.47919
Posterior Tibial Tendon Dysfunction	3	1		1.12949
Postcholecystectomy Syndrome	2	1	1	1.69423	2.92662	4.95837
Positive-Pressure Respiration, Intrinsic	5	1	1	0.677691	2.92662	1.98335
Port-Wine Stain	14	3	1	0.726098	0.975542	0.708339
Porphyrias, Hepatic	36	17	11	1.6001	1.8937	3.03012
Porphyrias	128	59	32	1.56187	1.58732	2.47919
Porphyria, Hepatoerythropoietic	14	10	6	2.42033	1.75597	4.25003
Porphyria, Erythropoietic	9	8	4	3.01196	1.46331	4.40744
Porphyria, Acute Intermittent	23	14	7	2.06254	1.46331	3.01814
Porphyria Cutanea Tarda	40	20	15	1.69423	2.19497	3.71878
Porokeratosis	22	11	5	1.69423	1.33028	2.2538
Porcine Reproductive and Respiratory Syndrome	34	20	12	1.99321	1.75597	3.50003
Popliteal Cyst	4
Polyuria	60	29	13	1.63775	1.31194	2.14863
Polyradiculopathy	17	10	8	1.99321	2.3413	4.6667
Polyradiculoneuropathy, Chronic Inflammatory Demyelinating	41	25	19	2.06613	2.22423	4.59556
Polyradiculoneuropathy	110	60	44	1.84825	2.14619	3.9667
Polyps	144	73	49	1.71776	1.96445	3.37445
Polyomavirus Infections	17	14	10	2.79049	2.09045	5.83338
Polyneuropathies	85	42	28	1.6743	1.95108	3.26669
Polymyositis	155	84	52	1.83632	1.81172	3.32691
Polymyalgia Rheumatica	89	50	33	1.90363	1.93157	3.67699
Polyhydramnios	43	16	12	1.26082	2.19497	2.76746
Polyendocrinopathies, Autoimmune	98	56	24	1.93626	1.25427	2.42859
Polydactyly	105	41	19	1.32311	1.35624	1.79446
Polycythemia Vera	197	111	65	1.90923	1.71379	3.27202
Polycythemia	162	80	50	1.67331	1.82914	3.06072
Polycystic Ovary Syndrome	177	81	51	1.55065	1.84269	2.85737
Polycystic Kidney, Autosomal Recessive	67	35	19	1.77009	1.58874	2.81221
Polycystic Kidney, Autosomal Dominant	190	102	62	1.81907	1.77893	3.23599
Polycystic Kidney Diseases	225	111	63	1.67164	1.66106	2.77669
Polychondritis, Relapsing	24	11	10	1.55304	2.66057	4.13198
Polyarteritis Nodosa	100	46	29	1.55869	1.84505	2.87586
Poliomyelitis	126	77	51	2.07072	1.93841	4.01392
Poland Syndrome	3
Poisoning	140	75	50	1.81524	1.95108	3.54169
Poikiloderma Congenitale	19	5	4	0.891699	2.3413	2.08774
POEMS Syndrome	23	11	10	1.62057	2.66057	4.31163
Pneumovirus Infections	9	4	4	1.50598	2.92662	4.40744
Pneumothorax	80	37	24	1.56716	1.89835	2.97502
Pneumoperitoneum	18	10	6	1.88248	1.75597	3.30558
Pneumopericardium	2	1		1.69423
Pneumonia, Viral	113	55	36	1.64925	1.91561	3.15932
Pneumonia, Staphylococcal	13	6	5	1.5639	2.43885	3.81413
Pneumonia, Rickettsial	1	1	1	3.38846	2.92662	9.91674
Pneumonia, Progressive Interstitial, of Sheep	30	21	15	2.37192	2.09045	4.95837
Pneumonia, Pneumocystis	165	90	57	1.84825	1.85353	3.42578
Pneumonia, Pneumococcal	90	48	35	1.80718	2.134	3.85651
Pneumonia, Mycoplasma	64	33	25	1.74717	2.21714	3.87373
Pneumonia, Lipid	5	2	1	1.35538	1.46331	1.98335
Pneumonia, Bacterial	170	92	59	1.83375	1.87686	3.44169
Pneumonia, Atypical Interstitial, of Cattle	2	1	1	1.69423	2.92662	4.95837
Pneumonia, Aspiration	61	31	19	1.722	1.79374	3.08882
Pneumonia of Swine, Mycoplasmal	9	4	2	1.50598	1.46331	2.20372
Pneumonia	468	249	152	1.80283	1.78653	3.22082
Pneumocystis Infections	31	15	13	1.63958	2.53641	4.15863
Pneumoconiosis	52	28	23	1.82455	2.40401	4.38625
Pneumococcal Infections	196	98	59	1.69423	1.76195	2.98514
Pneumocephalus	5	1	1	0.677691	2.92662	1.98335
Pneumatosis Cystoides Intestinalis	10	4	3	1.35538	2.19497	2.97502
Plummer-Vinson Syndrome	1
Pleuropneumonia, Contagious	16	10	4	2.11779	1.17065	2.47919
Pleuropneumonia	30	12	7	1.35538	1.7072	2.31391
Pleurodynia, Epidemic	1
Pleurisy	126	78	55	2.09762	2.06365	4.32874
Pleural Neoplasms	223	125	83	1.89936	1.94328	3.69098
Pleural Effusion, Malignant	200	113	74	1.91448	1.91655	3.66919
Pleural Effusion	319	177	105	1.88012	1.73613	3.26413
Pleural Diseases	58	36	26	2.10318	2.11367	4.44544
Platybasia	7	1	1	0.484065	2.92662	1.41668
Platelet Storage Pool Deficiency	39	23	15	1.99832	1.90867	3.81413
Plasmacytoma	475	260	159	1.85473	1.78974	3.3195
Plant Poisoning	66	34	22	1.74557	1.8937	3.30558
Plague	41	25	16	2.06613	1.87304	3.86995
Placental Insufficiency	73	43	29	1.99594	1.97377	3.93953
Placenta, Retained	17	10	8	1.99321	2.3413	4.6667
Placenta Praevia	14	4	4	0.968131	2.92662	2.83335
Placenta Diseases	117	53	33	1.53494	1.82224	2.79703
Placenta Accreta	10	5	2	1.69423	1.17065	1.98335
Pityriasis Rubra Pilaris	10	5	5	1.69423	2.92662	4.95837
Pityriasis Rosea	12	6	4	1.69423	1.95108	3.30558
Pityriasis Lichenoides	24	12	10	1.69423	2.43885	4.13198
Pityriasis	14	10	9	2.42033	2.63396	6.37505
Pituitary Neoplasms	658	374	215	1.92596	1.68242	3.24027
Pituitary Diseases	92	36	22	1.32592	1.78849	2.37139
Pituitary Apoplexy	8	2	2	0.847114	2.92662	2.47919
Pinealoma	55	29	12	1.78664	1.21102	2.16365
Pilonidal Sinus	10	5	5	1.69423	2.92662	4.95837
Pilomatrixoma	30	13	9	1.46833	2.02612	2.97502
Pigmentation Disorders	196	89	55	1.53864	1.80859	2.78276
Pierre Robin Syndrome	18	4		0.75299
Piedra	1	1	1	3.38846	2.92662	9.91674
Piebaldism	22	14	2	2.15629	0.418089	0.901522
Picornaviridae Infections	50	23	17	1.55869	2.16316	3.37169
Pickwickian Syndrome	7	1		0.484065
Pick Disease of the Brain	19	13	5	2.31842	1.12562	2.60967
Pica	8	6	5	2.54134	2.43885	6.19796
Phyllodes Tumor	77	40	24	1.76024	1.75597	3.09093
Photosensitivity Disorders	176	98	70	1.88675	2.09045	3.94416
Photophobia	15	5	3	1.12949	1.75597	1.98335
Phosphorus Metabolism Disorders	10	2	2	0.677691	2.92662	1.98335
Phobic Disorders	68	27	20	1.34542	2.16787	2.91669
Phlebotomus Fever	7	5	5	2.42033	2.92662	7.08339
Phlebitis	36	19	13	1.78835	2.00243	3.58105
Phimosis	5	1	1	0.677691	2.92662	1.98335
Philadelphia Chromosome	171	84	54	1.66451	1.8814	3.1316
Pheochromocytoma	566	321	177	1.92172	1.61375	3.10117
Phenylketonurias	133	73	40	1.85983	1.60363	2.98248
Phenylketonuria, Maternal	4	3	2	2.54134	1.95108	4.95837
Phencyclidine Abuse	7	3	2	1.4522	1.95108	2.83335
Pharyngitis	70	34	29	1.64582	2.49624	4.10836
Pharyngeal Neoplasms	164	91	63	1.88018	2.02612	3.80948
Pharyngeal Diseases	43	19	10	1.49723	1.54033	2.30622
Phantom Limb	16	5	2	1.05889	1.17065	1.23959
Phagocyte Bactericidal Dysfunction	30	13	10	1.46833	2.25125	3.30558
Peutz-Jeghers Syndrome	56	34	19	2.05728	1.63547	3.36461
Pestivirus Infections	5	2	2	1.35538	2.92662	3.9667
Peste-des-Petits-Ruminants	1
Personality Disorders	93	39	23	1.42097	1.72596	2.45253
Persistent Vegetative State	22	14	8	2.15629	1.67236	3.60609
Persistent Fetal Circulation Syndrome	18	9	8	1.69423	2.60144	4.40744
Persian Gulf Syndrome	28	13	10	1.57321	2.25125	3.54169
Peroxisomal Disorders	52	30	18	1.95488	1.75597	3.43272
Peroneal Neuropathies	3	1	1	1.12949	2.92662	3.30558
Peritonsillar Abscess	7	2	1	0.968131	1.46331	1.41668
Peritonitis, Tuberculous	19	10	6	1.7834	1.75597	3.1316
Peritonitis	351	183	114	1.76663	1.82314	3.22082
Peritoneal Diseases	100	49	35	1.66034	2.09045	3.47086
Peripheral Vascular Diseases	169	89	60	1.78445	1.97301	3.52074
Peripheral Nervous System Neoplasms	148	79	45	1.8087	1.66706	3.01523
Peripheral Nervous System Diseases	395	212	126	1.81861	1.73941	3.16332
Periostitis	10	6	2	2.03307	0.975542	1.98335
Periodontitis, Juvenile	103	50	36	1.64488	2.10717	3.46605
Periodontitis	373	198	133	1.7987	1.96586	3.536
Periodontal Pocket	151	85	60	1.90741	2.06585	3.94043
Periodontal Diseases	242	134	81	1.87625	1.76908	3.31924
Periodontal Cyst	12	8	3	2.25897	1.09748	2.47919
Periodontal Attachment Loss	83	41	29	1.67382	2.07005	3.46489
Periodontal Abscess	13	4	3	1.0426	2.19497	2.28848
Perinephritis	3	1	1	1.12949	2.92662	3.30558
Pericoronitis	5	3	2	2.03307	1.95108	3.9667
Pericarditis, Tuberculous	11	7	5	2.15629	2.09045	4.50761
Pericarditis, Constrictive	17	5	4	0.996605	2.3413	2.33335
Pericarditis	66	26	15	1.33485	1.68844	2.2538
Pericardial Effusion	108	54	38	1.69423	2.05948	3.48922
Periarthritis	10	4	4	1.35538	2.92662	3.9667
Periapical Periodontitis	38	22	17	1.96174	2.26148	4.43644
Periapical Granuloma	63	41	31	2.20519	2.21281	4.87967
Periapical Diseases	49	29	21	2.00541	2.11928	4.25003
Periapical Abscess	21	9	6	1.4522	1.95108	2.83335
Perceptual Disorders	42	22	13	1.77491	1.72937	3.06947
Peptic Ulcer Perforation	22	9	7	1.38619	2.27626	3.15533
Peptic Ulcer Hemorrhage	43	21	11	1.65483	1.53299	2.53684
Peptic Ulcer	209	104	65	1.68612	1.82914	3.08415
Penile Neoplasms	59	35	22	2.0101	1.83959	3.69777
Penile Induration	44	19	12	1.4632	1.84839	2.70457
Penile Diseases	49	27	22	1.86711	2.38466	4.45241
Pemphigus, Benign Familial	14	9	5	2.17829	1.6259	3.54169
Pemphigus	172	84	59	1.65483	2.05561	3.40167
Pemphigoid, Bullous	145	73	43	1.70591	1.7239	2.94083
Pemphigoid, Benign Mucous Membrane	68	34	24	1.69423	2.06585	3.50003
Pelvic Pain	37	20	18	1.8316	2.63396	4.82436
Pelvic Neoplasms	137	64	42	1.58293	1.9206	3.04017
Pelvic Inflammatory Disease	54	25	15	1.56873	1.75597	2.75465
Pelvic Infection	1	1	1	3.38846	2.92662	9.91674
Pellagra	11	8	6	2.46433	2.19497	5.40913
Pelizaeus-Merzbacher Disease	16	6	1	1.27067	0.487771	0.619796
Peliosis Hepatis	9	5	5	1.88248	2.92662	5.5093
Pelger-Huet Anomaly	8	3	1	1.27067	0.975542	1.23959
Pedophilia	6	2	2	1.12949	2.92662	3.30558
Peanut Hypersensitivity	8	1		0.423557
Patellar Dislocation	2	1		1.69423
Pasteurellosis, Pneumonic	37	24	18	2.19792	2.19497	4.82436
Pasteurellaceae Infections	6	2	1	1.12949	1.46331	1.65279
Pasteurella Infections	85	45	32	1.79389	2.08116	3.73336
Parvoviridae Infections	94	49	29	1.76632	1.73208	3.05942
Pars Planitis	13	5	3	1.30325	1.75597	2.28848
Parovarian Cyst	2
Parotitis	23	14	12	2.06254	2.50854	5.17395
Parotid Neoplasms	156	82	57	1.78111	2.03436	3.62342
Parotid Diseases	32	16	9	1.69423	1.64623	2.78908
Paronychia	8	3	3	1.27067	2.92662	3.71878
Parkinsonian Disorders	169	86	46	1.7243	1.5654	2.69923
Parkinson Disease, Secondary	186	86	52	1.56671	1.76959	2.77242
Paresthesia	63	28	16	1.50598	1.67236	2.51854
Paresis	77	34	22	1.4962	1.8937	2.83335
Paratyphoid Fever	15	9	7	2.03307	2.27626	4.62781
Paratuberculosis	57	33	20	1.96174	1.77371	3.47956
Parathyroid Neoplasms	160	85	46	1.80012	1.58382	2.85106
Parathyroid Diseases	35	16	13	1.54901	2.37788	3.68336
Parasomnias	2	1		1.69423
Parasitic Diseases, Animal	17	12	9	2.39185	2.19497	5.25004
Parasitic Diseases	61	34	20	1.88865	1.72154	3.25139
Parasitemia	143	71	46	1.68238	1.89612	3.19
Parapsoriasis	23	12	8	1.76789	1.95108	3.4493
Paraproteinemias	207	108	75	1.76789	2.03238	3.59302
Paraplegia	188	94	53	1.69423	1.65012	2.79568
Paraphimosis	1
Paraphilias	16	7	6	1.48245	2.50854	3.71878
Paraparesis, Tropical Spastic	147	80	57	1.84406	2.08522	3.84527
Paraparesis, Spastic	16	7	3	1.48245	1.25427	1.85939
Paraparesis	16	11	5	2.32956	1.33028	3.09898
Paranoid Personality Disorder	3
Paranoid Disorders	35	14	10	1.35538	2.09045	2.83335
Paraneoplastic Syndromes, Nervous System	29	16	8	1.86949	1.46331	2.73565
Paraneoplastic Syndromes	171	79	46	1.56543	1.70411	2.66766
Paraneoplastic Polyneuropathy	10	5	1	1.69423	0.585325	0.991674
Paraneoplastic Endocrine Syndromes	61	30	21	1.66645	2.04864	3.41396
Paraneoplastic Cerebellar Degeneration	9	4	3	1.50598	2.19497	3.30558
Paranasal Sinus Neoplasms	109	61	42	1.89629	2.01505	3.82113
Paranasal Sinus Diseases	41	16	13	1.32232	2.37788	3.14433
Paramyxoviridae Infections	67	38	26	1.92181	2.00243	3.84829
Paralysis, Obstetric	6	3	1	1.69423	0.975542	1.65279
Paralysis, Hyperkalemic Periodic	2	1		1.69423
Paralysis	290	155	93	1.81107	1.75597	3.1802
Paralyses, Familial Periodic	30	11	6	1.24243	1.59634	1.98335
Parakeratosis	15	5	4	1.12949	2.3413	2.64446
Paragonimiasis	25	13	8	1.762	1.801	3.17336
Paraganglioma, Extra-Adrenal	64	32	19	1.69423	1.73768	2.94403
Paraganglioma	104	61	34	1.98746	1.63123	3.24201
Paracoccidioidomycosis	74	45	30	2.06055	1.95108	4.0203
Papovaviridae Infections	249	144	86	1.95959	1.74785	3.42506
Papillon-Lefevre Disease	24	12	10	1.69423	2.43885	4.13198
Papillomavirus Infections	128	70	45	1.85306	1.8814	3.48635
Papilloma, Inverted	19	14	12	2.49676	2.50854	6.26321
Papilloma, Intraductal	31	19	11	2.0768	1.69436	3.51884
Papilloma, Choroid Plexus	9	3	3	1.12949	2.92662	3.30558
Papilloma	346	183	114	1.79216	1.82314	3.26737
Papilledema	30	10	7	1.12949	2.04864	2.31391
Panuveitis	24	9	7	1.27067	2.27626	2.89238
Panophthalmitis	1
Panniculitis, Peritoneal	1
Panniculitis, Nodular Nonsuppurative	13	6	2	1.5639	0.975542	1.52565
Panniculitis, Lupus Erythematosus	8	5	4	2.11779	2.3413	4.95837
Panniculitis	39	22	16	1.91144	2.12845	4.06841
Panic Disorder	100	43	28	1.45704	1.90571	2.77669
Pancytopenia	114	56	40	1.66451	2.09045	3.47956
Pancreatitis, Alcoholic	54	31	25	1.94523	2.36018	4.59108
Pancreatitis, Acute Necrotizing	80	52	35	2.2025	1.96984	4.33857
Pancreatitis	574	311	185	1.83591	1.74092	3.19616
Pancreatic Pseudocyst	26	14	8	1.82455	1.67236	3.05131
Pancreatic Fistula	20	13	8	2.2025	1.801	3.9667
Pancreatic Diseases	221	114	74	1.74789	1.89974	3.32054
Pancreatic Cyst	45	21	13	1.58128	1.81172	2.86484
Pancoast's Syndrome	6	2	2	1.12949	2.92662	3.30558
Pallor	8	3	2	1.27067	1.95108	2.47919
Palatal Neoplasms	76	43	30	1.91715	2.04183	3.9145
Pain, Postoperative	159	74	42	1.57702	1.66106	2.61952
Pain, Intractable	52	23	16	1.49874	2.03591	3.05131
Pain Insensitivity, Congenital	12	5	3	1.41186	1.75597	2.47919
Pain	812	391	229	1.63163	1.71406	2.79672
Paget's Disease, Mammary	47	26	16	1.87447	1.801	3.37591
Paget's Disease, Extramammary	62	34	20	1.85819	1.72154	3.19895
Oxyurida Infections	2	2	2	3.38846	2.92662	9.91674
Oxyuriasis	13	8	5	2.0852	1.82914	3.81413
Overnutrition	1	1	1	3.38846	2.92662	9.91674
Overdose	113	55	39	1.64925	2.07524	3.42259
Ovarian Neoplasms	1478	826	455	1.89368	1.61212	3.05285
Ovarian Hyperstimulation Syndrome	54	28	19	1.75698	1.98592	3.48922
Ovarian Failure, Premature	72	26	16	1.22361	1.801	2.20372
Ovarian Diseases	148	69	48	1.57975	2.03591	3.21624
Ovarian Cysts	139	60	41	1.46264	1.99986	2.92508
Otosclerosis	53	28	16	1.79013	1.67236	2.99373
Otorhinolaryngologic Neoplasms	61	31	24	1.722	2.26577	3.90167
Otorhinolaryngologic Diseases	28	7	4	0.847114	1.67236	1.41668
Otitis Media, Suppurative	38	16	10	1.42672	1.82914	2.60967
Otitis Media with Effusion	153	66	42	1.46169	1.8624	2.72224
Otitis Media	179	88	53	1.66583	1.76263	2.93624
Otitis Externa	17	9	6	1.79389	1.95108	3.50003
Otitis	25	10	7	1.35538	2.04864	2.77669
Ostertagiasis	39	20	17	1.73767	2.48763	4.32268
Osteosclerosis	52	15	10	0.977439	1.95108	1.90707
Osteosarcoma, Juxtacortical	6	4	2	2.25897	1.46331	3.30558
Osteosarcoma	901	505	273	1.89919	1.58212	3.00474
Osteoradionecrosis	20	11	8	1.86365	2.12845	3.9667
Osteoporosis, Postmenopausal	169	83	53	1.66415	1.86881	3.10998
Osteoporosis	307	138	83	1.52315	1.76022	2.68107
Osteopoikilosis	6	1	1	0.564743	2.92662	1.65279
Osteopetrosis	156	84	53	1.82455	1.84656	3.36915
Osteonecrosis	46	18	8	1.32592	1.30072	1.72465
Osteomyelitis	123	67	38	1.84574	1.65988	3.06371
Osteomalacia	81	31	17	1.29682	1.60492	2.08129
Osteoma, Osteoid	33	18	13	1.84825	2.11367	3.9066
Osteoma	33	16	11	1.64289	2.01205	3.30558
Osteolysis, Essential	15	6	4	1.35538	1.95108	2.64446
Osteolysis	149	76	46	1.72834	1.77138	3.06154
Osteogenesis Imperfecta	70	31	17	1.5006	1.60492	2.40835
Osteochondromatosis	2	1	1	1.69423	2.92662	4.95837
Osteochondroma	48	28	18	1.9766	1.8814	3.71878
Osteochondrodysplasias	204	108	55	1.79389	1.49041	2.67363
Osteochondritis Dissecans	9	5	5	1.88248	2.92662	5.5093
Osteochondritis	37	18	10	1.64844	1.6259	2.6802
Osteoarthropathy, Secondary Hypertrophic	31	16	14	1.74888	2.5608	4.47853
Osteoarthropathy, Primary Hypertrophic	14	7	6	1.69423	2.50854	4.25003
Osteoarthritis, Knee	166	86	51	1.75547	1.73556	3.04671
Osteoarthritis, Hip	106	56	38	1.79013	1.98592	3.55506
Osteoarthritis	648	370	221	1.93477	1.74807	3.3821
Osteitis Fibrosa Cystica	18	8	5	1.50598	1.82914	2.75465
Osteitis Deformans	94	47	35	1.69423	2.1794	3.6924
Osteitis	32	17	13	1.80012	2.23801	4.02868
Ossification, Heterotopic	127	64	38	1.70757	1.73768	2.96721
Ossification of Posterior Longitudinal Ligament	32	12	8	1.27067	1.95108	2.47919
Orthomyxoviridae Infections	71	42	21	2.00444	1.46331	2.93312
Oropharyngeal Neoplasms	105	64	37	2.06535	1.69195	3.49447
Orofaciodigital Syndromes	20	4	1	0.677691	0.731656	0.495837
Oroantral Fistula	3
Ornithosis	35	20	13	1.93626	1.90231	3.68336
Ornithine Carbamoyltransferase Deficiency Disease	6	3	2	1.69423	1.95108	3.30558
Orchitis	49	29	19	2.00541	1.91744	3.84527
Orbital Neoplasms	95	48	32	1.71206	1.95108	3.34038
Orbital Fractures	15	5	3	1.12949	1.75597	1.98335
Orbital Diseases	44	21	11	1.61722	1.53299	2.47919
Oral Ulcer	46	22	18	1.62057	2.39451	3.88046
Oral Submucous Fibrosis	38	21	14	1.87257	1.95108	3.65354
Oral Manifestations	17	7	4	1.39525	1.67236	2.33335
Oral Hemorrhage	22	6	2	0.924125	0.975542	0.901522
Oral Fistula	3
Optic Neuropathy, Ischemic	27	11	7	1.38048	1.8624	2.57101
Optic Neuritis	92	44	26	1.62057	1.72937	2.80256
Optic Nerve Neoplasms	15	7	5	1.58128	2.09045	3.30558
Optic Nerve Injuries	99	56	31	1.9167	1.6201	3.10524
Optic Nerve Glioma	7	2		0.968131
Optic Nerve Diseases	89	43	25	1.63712	1.70153	2.7856
Optic Disk Drusen	5	1	1	0.677691	2.92662	1.98335
Optic Atrophy, Hereditary, Leber	35	13	8	1.25857	1.801	2.26668
Optic Atrophy, Autosomal Dominant	6	4	1	2.25897	0.731656	1.65279
Optic Atrophy	63	23	8	1.23706	1.01796	1.25927
Optic Atrophies, Hereditary	65	35	17	1.82455	1.4215	2.59361
Opportunistic Infections	195	96	62	1.66816	1.89011	3.15302
Opisthorchiasis	18	7	4	1.31773	1.67236	2.20372
Opioid-Related Disorders	102	45	30	1.49491	1.95108	2.91669
Ophthalmoplegia, Chronic Progressive External	28	16	10	1.93626	1.82914	3.54169
Ophthalmoplegia	72	31	21	1.45892	1.98255	2.89238
Ophthalmia, Sympathetic	24	15	9	2.11779	1.75597	3.71878
Ophthalmia Neonatorum	4	1	1	0.847114	2.92662	2.47919
Open Bite	10	2	2	0.677691	2.92662	1.98335
Oophoritis	28	10	6	1.21016	1.75597	2.12502
Onychomycosis	19	8	5	1.42672	1.82914	2.60967
Onchocerciasis, Ocular	32	15	8	1.58834	1.56087	2.47919
Onchocerciasis	102	49	33	1.62779	1.97099	3.20836
Olivopontocerebellar Atrophies	59	26	11	1.49322	1.23819	1.84888
Oliguria	29	14	10	1.63581	2.09045	3.41957
Oligospermia	235	113	64	1.62934	1.65756	2.70073
Oligomenorrhea	38	13	11	1.15921	2.47637	2.87064
Oligohydramnios	33	17	11	1.74557	1.8937	3.30558
Oligodendroglioma	239	127	66	1.80056	1.52092	2.73851
Olfactory Nerve Diseases	4	1	1	0.847114	2.92662	2.47919
Olfaction Disorders	72	31	23	1.45892	2.17137	3.16785
Oesophagostomiasis	19	14	12	2.49676	2.50854	6.26321
Odontoma	27	16	11	2.00797	2.01205	4.04015
Odontogenic Tumors	55	31	21	1.90986	1.98255	3.78639
Odontogenic Cysts	62	40	29	2.1861	2.1218	4.63848
Odontogenic Cyst, Calcifying	17	7	6	1.39525	2.50854	3.50003
Odontodysplasia	16	10	5	2.11779	1.46331	3.09898
Oculomotor Nerve Diseases	11	3	2	0.924125	1.95108	1.80304
Oculocerebrorenal Syndrome	32	16	6	1.69423	1.09748	1.85939
Ocular Motility Disorders	63	21	7	1.12949	0.975542	1.10186
Ocular Hypotension	32	17	10	1.80012	1.72154	3.09898
Ocular Hypertension	111	52	32	1.58739	1.801	2.85888
Ochronosis	7	2	1	0.968131	1.46331	1.41668
Occupational Diseases	442	230	141	1.76322	1.79415	3.16349
Obsessive-Compulsive Disorder	99	43	26	1.47175	1.76959	2.6044
Obesity, Morbid	153	67	45	1.48383	1.96564	2.91669
Obesity	967	500	271	1.75205	1.58623	2.77915
Nystagmus, Pathologic	69	24	13	1.17859	1.58526	1.86837
Nystagmus, Congenital	11	7	4	2.15629	1.67236	3.60609
Nutrition Disorders	354	187	109	1.78995	1.70589	3.05346
Nut Hypersensitivity	7	4	2	1.93626	1.46331	2.83335
Nose Neoplasms	182	100	69	1.86179	2.01937	3.75964
Nose Diseases	57	24	18	1.42672	2.19497	3.1316
Nose Deformities, Acquired	9	2		0.75299
Noonan Syndrome	46	21	11	1.5469	1.53299	2.37139
Nonodontogenic Cysts	5	3	3	2.03307	2.92662	5.95004
Nondisjunction, Genetic	106	61	32	1.94996	1.53528	2.99373
Noma	2	1	1	1.69423	2.92662	4.95837
Nocturnal Paroxysmal Dystonia	2	1		1.69423
Nocturnal Myoclonus Syndrome	9	4	1	1.50598	0.731656	1.10186
Nocardia Infections	34	15	11	1.49491	2.14619	3.20836
Night Terrors	1
Night Blindness	74	28	12	1.28212	1.25427	1.60812
Newcastle Disease	48	27	22	1.90601	2.38466	4.54517
Nevus, Spindle Cell	1	1	1	3.38846	2.92662	9.91674
Nevus, Pigmented	177	98	62	1.87609	1.85154	3.47366
Nevus, Intradermal	25	16	10	2.16861	1.82914	3.9667
Nevus, Epithelioid and Spindle Cell	34	27	21	2.69083	2.27626	6.12505
Nevus, Blue	31	18	10	1.96749	1.6259	3.19895
Nevus of Ota	1
Nevus	203	112	74	1.86949	1.93366	3.61497
Neutropenia	348	186	105	1.81107	1.65213	2.99212
Neurotoxicity Syndromes	76	36	17	1.60506	1.38202	2.21822
Neurotic Disorders	92	40	24	1.47324	1.75597	2.58698
Neurothekeoma	18	13	11	2.44722	2.47637	6.06023
Neurosyphilis	24	14	8	1.9766	1.67236	3.30558
Neuroschistosomiasis	1	1		3.38846
Neuronal Ceroid-Lipofuscinosis	121	69	32	1.93226	1.35728	2.62261
Neuromyelitis Optica	14	8	7	1.93626	2.5608	4.95837
Neuromuscular Junction Diseases	8	1		0.423557
Neuromuscular Diseases	273	140	79	1.73767	1.65145	2.86968
Neuroma, Acoustic	122	49	32	1.36094	1.91127	2.60111
Neuroma	59	31	16	1.78038	1.51052	2.68929
Neurologic Manifestations	47	20	12	1.4419	1.75597	2.53193
Neuroleptic Malignant Syndrome	29	12	11	1.40212	2.68274	3.76152
Neurogenic Inflammation	43	24	16	1.89123	1.95108	3.68995
Neurofibrosarcoma	44	28	22	2.15629	2.29949	4.95837
Neurofibromatosis 2	80	35	21	1.48245	1.75597	2.60314
Neurofibromatosis 1	218	107	56	1.66314	1.53169	2.54742
Neurofibromatoses	40	19	9	1.60952	1.3863	2.23127
Neurofibroma, Plexiform	21	12	11	1.93626	2.68274	5.19448
Neurofibroma	128	67	42	1.77365	1.8346	3.25393
Neuroendocrine Tumors	188	110	67	1.98261	1.78258	3.53416
Neuroectodermal Tumors, Primitive, Peripheral	152	88	54	1.96174	1.79588	3.52305
Neuroectodermal Tumors, Primitive	187	105	66	1.90261	1.83959	3.50003
Neuroectodermal Tumors	87	53	32	2.06423	1.76702	3.64754
Neuroectodermal Tumor, Melanotic	17	11	6	2.19253	1.59634	3.50003
Neurodermatitis	22	11	9	1.69423	2.39451	4.05685
Neurocytoma	32	21	15	2.22367	2.09045	4.64847
Neurocysticercosis	42	23	16	1.85558	2.03591	3.77781
Neurocutaneous Syndromes	8	2	1	0.847114	1.46331	1.23959
Neurocirculatory Asthenia	3	1	1	1.12949	2.92662	3.30558
Neurobehavioral Manifestations	16	4	3	0.847114	2.19497	1.85939
Neuroaxonal Dystrophies	17	12	7	2.39185	1.7072	4.08336
Neuroaspergillosis	1	1	1	3.38846	2.92662	9.91674
Neuritis, Autoimmune, Experimental	73	37	26	1.71744	2.05655	3.53199
Neuritis	132	75	51	1.92526	1.9901	3.83147
Neurilemmoma	248	135	82	1.84452	1.77765	3.27892
Neurasthenia	13	5	3	1.30325	1.75597	2.28848
Neuralgia	105	51	36	1.64582	2.06585	3.40003
Neural Tube Defects	313	151	88	1.63469	1.70558	2.78809
Nervous System Neoplasms	225	116	68	1.74694	1.71561	2.99706
Nervous System Malformations	156	68	39	1.47702	1.67851	2.47919
Nervous System Diseases	634	346	205	1.84922	1.73398	3.20652
Nervous System Autoimmune Disease, Experimental	17	9	5	1.79389	1.6259	2.91669
Nerve Sheath Tumors	93	53	33	1.93106	1.82224	3.51884
Nerve Degeneration	778	427	245	1.85973	1.67921	3.12288
Nerve Compression Syndromes	95	43	26	1.53372	1.76959	2.71406
Nephrotic Syndrome	322	176	110	1.85208	1.82914	3.38771
Nephrosis, Lipoid	142	79	51	1.88513	1.88934	3.56165
Nephrosis	143	86	63	2.03781	2.14392	4.36891
Nephrosclerosis	59	30	23	1.72294	2.24375	3.86585
Nephroma, Mesoblastic	20	11	7	1.86365	1.8624	3.47086
Nephrocalcinosis	39	17	11	1.47702	1.8937	2.79703
Nephroblastoma	408	212	121	1.76067	1.67038	2.94099
Nephritis, Interstitial	205	110	76	1.8182	2.02203	3.67645
Nephritis, Hereditary	90	42	23	1.58128	1.60268	2.53428
Nephritis	238	126	83	1.79389	1.92786	3.45836
Neoplastic Syndromes, Hereditary	119	57	31	1.62304	1.59167	2.58335
Neoplastic Processes	12	7	6	1.9766	2.50854	4.95837
Neoplasms, Vascular Tissue	42	27	19	2.17829	2.05948	4.48614
Neoplasms, Unknown Primary	91	51	34	1.89903	1.95108	3.70516
Neoplasms, Squamous Cell	90	46	30	1.73188	1.90867	3.30558
Neoplasms, Second Primary	327	154	94	1.59579	1.78638	2.85068
Neoplasms, Radiation-Induced	369	192	112	1.7631	1.7072	3.00996
Neoplasms, Post-Traumatic	2	1		1.69423
Neoplasms, Neuroepithelial	47	25	12	1.80237	1.40478	2.53193
Neoplasms, Nerve Tissue	100	57	37	1.93142	1.89974	3.66919
Neoplasms, Muscle Tissue	62	35	21	1.91284	1.75597	3.3589
Neoplasms, Multiple Primary	361	181	102	1.69892	1.64926	2.80196
Neoplasms, Mesothelial	30	18	11	2.03307	1.78849	3.63614
Neoplasms, Hormone-Dependent	409	236	132	1.9552	1.63693	3.20051
Neoplasms, Gonadal Tissue	8	4	3	1.69423	2.19497	3.71878
Neoplasms, Glandular and Epithelial	201	112	69	1.8881	1.80301	3.40425
Neoplasms, Germ Cell and Embryonal	265	128	79	1.63669	1.80628	2.95631
Neoplasms, Fibrous Tissue	33	20	15	2.05361	2.19497	4.50761
Neoplasms, Fibroepithelial	1	1		3.38846
Neoplasms, Experimental	1507	815	433	1.83251	1.55488	2.84934
Neoplasms, Ductal, Lobular, and Medullary	13	7	3	1.82455	1.25427	2.28848
Neoplasms, Cystic, Mucinous, and Serous	4	4	3	3.38846	2.19497	7.43756
Neoplasms, Complex and Mixed	16	11	9	2.32956	2.39451	5.57817
Neoplasms, Bone Tissue	1
Neoplasms, Basal Cell	57	33	25	1.96174	2.21714	4.34945
Neoplasms, Adnexal and Skin Appendage	4	4	1	3.38846	0.731656	2.47919
Neoplasms, Adipose Tissue	17	8	4	1.59457	1.46331	2.33335
Neoplasms	2287	1243	652	1.84165	1.53512	2.82716
Neoplasm, Residual	271	135	77	1.68798	1.66926	2.81767
Neoplasm Seeding	58	28	17	1.63581	1.77688	2.90663
Neoplasm Regression, Spontaneous	136	72	41	1.79389	1.66655	2.98961
Neoplasm Recurrence, Local	818	419	240	1.73565	1.67635	2.90956
Neoplasm Metastasis	1432	779	452	1.8433	1.69812	3.13014
Neoplasm Invasiveness	1209	682	404	1.91144	1.73366	3.31378
Neoplasm Circulating Cells	277	141	99	1.72481	2.05486	3.54425
Neonatal Abstinence Syndrome	7	1		0.484065
Nematode Infections	115	68	43	2.00361	1.85066	3.708
Nelson Syndrome	31	18	10	1.96749	1.6259	3.19895
Neisseriaceae Infections	24	10	7	1.41186	2.04864	2.89238
Needlestick Injuries	39	16	9	1.39014	1.64623	2.28848
Necrosis	960	515	298	1.81777	1.69346	3.07832
Necrobiosis Lipoidica	26	12	8	1.5639	1.95108	3.05131
Neck Pain	23	9	6	1.32592	1.95108	2.58698
Neck Injuries	27	3	1	0.376495	0.975542	0.367287
Necatoriasis	20	11	8	1.86365	2.12845	3.9667
Near Drowning	11	5	3	1.54021	1.75597	2.70457
Nausea	226	105	62	1.57428	1.7281	2.72052
Nasopharyngitis	7	4	2	1.93626	1.46331	2.83335
Nasopharyngeal Neoplasms	459	254	156	1.87509	1.79745	3.3704
Nasopharyngeal Diseases	15	6	3	1.35538	1.46331	1.98335
Nasal Polyps	203	119	80	1.98634	1.96748	3.90808
Nasal Obstruction	58	31	17	1.81107	1.60492	2.90663
Narcolepsy	80	32	21	1.35538	1.9206	2.60314
Nairobi Sheep Disease	1	1	1	3.38846	2.92662	9.91674
Nails, Malformed	28	10	8	1.21016	2.3413	2.83335
Nails, Ingrown	2
Nail-Patella Syndrome	27	14	7	1.75698	1.46331	2.57101
Nail Diseases	59	26	18	1.49322	2.02612	3.02545
Myxosarcoma	11	10	8	3.08042	2.3413	7.21218
Myxomatosis, Infectious	6	5	4	2.82371	2.3413	6.61116
Myxoma	87	44	33	1.7137	2.19497	3.76152
Myxedema	61	31	23	1.722	2.17137	3.7391
Myotonic Dystrophy	223	118	68	1.793	1.68653	3.02394
Myotonic Disorders	14	5	1	1.21016	0.585325	0.708339
Myotonia Congenita	21	11	4	1.77491	1.06423	1.8889
Myotonia	50	20	11	1.35538	1.60964	2.18168
Myositis, Inclusion Body	74	47	33	2.15213	2.05486	4.42233
Myositis Ossificans	28	9	6	1.08915	1.95108	2.12502
Myositis	231	124	78	1.81891	1.84094	3.34851
Myosarcoma	13	9	6	2.34585	1.95108	4.57696
Myopia	143	74	44	1.75347	1.74016	3.05131
Myopathy, Central Core	7	2	1	0.968131	1.46331	1.41668
Myopathies, Structural, Congenital	36	20	8	1.88248	1.17065	2.20372
Myopathies, Nemaline	35	17	8	1.64582	1.37724	2.26668
Myoma	11	7	5	2.15629	2.09045	4.50761
Myokymia	5	2	1	1.35538	1.46331	1.98335
Myoglobinuria	45	24	13	1.80718	1.58526	2.86484
Myofibromatosis	19	12	6	2.14008	1.46331	3.1316
Myofascial Pain Syndromes	14	6	5	1.4522	2.43885	3.54169
Myoepithelioma	62	34	20	1.85819	1.72154	3.19895
Myoclonus	113	58	37	1.73921	1.86698	3.24707
Myoclonic Epilepsy, Juvenile	29	13	5	1.51896	1.12562	1.70978
Myoclonic Epilepsies, Progressive	35	21	12	2.03307	1.67236	3.40003
Myoclonic Cerebellar Dyssynergia	7	1	1	0.484065	2.92662	1.41668
Myocarditis	225	133	81	2.00295	1.78238	3.57003
Myocardial Stunning	112	66	49	1.99677	2.1728	4.33857
Myocardial Reperfusion Injury	360	219	135	2.06131	1.80408	3.71878
Myocardial Ischemia	598	338	191	1.91521	1.6538	3.16739
Myocardial Infarction	875	465	279	1.80072	1.75597	3.16202
Myiasis	39	23	18	1.99832	2.2904	4.57696
Myeloproliferative Disorders	285	153	82	1.81907	1.56852	2.85324
Myelolipoma	5	2	1	1.35538	1.46331	1.98335
Myeloid Metaplasia	61	30	20	1.66645	1.95108	3.25139
Myelofibrosis	171	93	60	1.84284	1.88814	3.47956
Myelodysplastic Syndromes	492	273	151	1.88018	1.61876	3.04355
Myelitis, Transverse	26	14	8	1.82455	1.67236	3.05131
Myelitis	88	45	34	1.73273	2.21123	3.83147
Myelinolysis, Central Pontine	17	8	5	1.59457	1.82914	2.91669
Mydriasis	17	6	5	1.19593	2.43885	2.91669
Mycotoxicosis	20	9	8	1.52481	2.60144	3.9667
Mycosis Fungoides	224	126	83	1.90601	1.92786	3.67451
Mycoses	150	77	49	1.73941	1.8624	3.23947
Mycoplasmatales Infections	10	5	4	1.69423	2.3413	3.9667
Mycoplasma Infections	145	64	40	1.49559	1.82914	2.73565
Mycobacterium Infections, Atypical	64	37	22	1.95895	1.74016	3.40888
Mycobacterium Infections	150	83	50	1.87495	1.76303	3.30558
Mycobacterium avium-intracellulare Infection	116	63	43	1.84028	1.99754	3.67603
Myasthenic Syndromes, Congenital	12	4	1	1.12949	0.731656	0.826395
Myasthenia Gravis, Neonatal	1
Myasthenia Gravis, Autoimmune, Experimental	24	16	10	2.25897	1.82914	4.13198
Myasthenia Gravis	279	147	86	1.78532	1.71218	3.05677
Mutism	10	3	1	1.01654	0.975542	0.991674
Mushroom Poisoning	30	16	10	1.80718	1.82914	3.30558
Musculoskeletal Diseases	89	41	23	1.56097	1.64177	2.56275
Musculoskeletal Abnormalities	32	9	7	0.953003	2.27626	2.16929
Muscular Dystrophy, Oculopharyngeal	2	2	1	3.38846	1.46331	4.95837
Muscular Dystrophy, Facioscapulohumeral	22	14	8	2.15629	1.67236	3.60609
Muscular Dystrophy, Emery-Dreifuss	26	14	3	1.82455	0.627134	1.14424
Muscular Dystrophy, Duchenne	136	74	42	1.84372	1.66106	3.06252
Muscular Dystrophies	452	219	124	1.64175	1.65708	2.72052
Muscular Disorders, Atrophic	13	7	6	1.82455	2.50854	4.57696
Muscular Diseases	436	234	137	1.81858	1.71345	3.11604
Muscular Atrophy, Spinal	178	97	53	1.84652	1.59908	2.95274
Muscular Atrophy	222	123	76	1.87739	1.80832	3.39492
Muscle Weakness	155	75	49	1.63958	1.91206	3.13497
Muscle Spasticity	98	47	30	1.62508	1.86806	3.03574
Muscle Rigidity	56	21	13	1.27067	1.81172	2.3021
Muscle Neoplasms	120	62	37	1.7507	1.74653	3.05766
Muscle Hypotonia	138	71	35	1.74334	1.4427	2.51512
Muscle Hypertonia	22	8	3	1.23217	1.09748	1.35228
Muscle Cramp	32	15	10	1.58834	1.95108	3.09898
Murine Acquired Immunodeficiency Syndrome	95	47	31	1.67639	1.93033	3.23599
Munchausen Syndrome	8	4	2	1.69423	1.46331	2.47919
Mumps	53	24	15	1.5344	1.82914	2.80662
Multiple Trauma	119	63	40	1.79389	1.85817	3.33336
Multiple System Atrophy	69	36	22	1.76789	1.78849	3.16186
Multiple Sclerosis, Relapsing-Remitting	146	76	49	1.76385	1.8869	3.32822
Multiple Sclerosis, Chronic Progressive	85	41	28	1.63443	1.99867	3.26669
Multiple Personality Disorder	7	4	2	1.93626	1.46331	2.83335
Multiple Organ Failure	186	103	64	1.8764	1.81849	3.41221
Multiple Myeloma	867	469	260	1.83297	1.62244	2.97388
Multiple Endocrine Neoplasia Type 2b	37	22	13	2.01476	1.72937	3.48426
Multiple Endocrine Neoplasia Type 2a	98	49	23	1.69423	1.37372	2.3274
Multiple Endocrine Neoplasia Type 1	114	66	35	1.96174	1.552	3.04461
Multiple Endocrine Neoplasia	117	61	30	1.76663	1.43932	2.54275
Multiple Chemical Sensitivity	16	6	5	1.27067	2.43885	3.09898
Multiple Carboxylase Deficiency	4	3		2.54134
Multicystic Dysplastic Kidney	10	6	4	2.03307	1.95108	3.9667
Mucormycosis	24	9	5	1.27067	1.6259	2.06599
Mucopolysaccharidosis VII	12	7	4	1.9766	1.67236	3.30558
Mucopolysaccharidosis VI	25	13	9	1.762	2.02612	3.57003
Mucopolysaccharidosis IV	23	7	4	1.03127	1.67236	1.72465
Mucopolysaccharidosis III	32	16	12	1.69423	2.19497	3.71878
Mucopolysaccharidosis II	34	14	11	1.39525	2.29949	3.20836
Mucopolysaccharidosis I	41	20	16	1.65291	2.3413	3.86995
Mucopolysaccharidoses	60	29	17	1.63775	1.71561	2.80974
Mucolipidoses	58	34	21	1.98634	1.80762	3.59054
Mucoepidermoid Tumor	2	2	2	3.38846	2.92662	9.91674
Mucocutaneous Lymph Node Syndrome	119	69	44	1.96474	1.86625	3.66669
Mucocele	22	6	4	0.924125	1.95108	1.80304
Mucinosis, Follicular	5	4	2	2.71077	1.46331	3.9667
Mucinoses	16	7	4	1.48245	1.67236	2.47919
MPTP Poisoning	89	46	28	1.75134	1.78142	3.11987
Moyamoya Disease	45	15	9	1.12949	1.75597	1.98335
Movement Disorders	252	117	67	1.57321	1.67593	2.63659
Mouth, Edentulous	35	11	8	1.06494	2.12845	2.26668
Mouth Neoplasms	668	389	232	1.97322	1.74544	3.44414
Mouth Diseases	198	111	78	1.89959	2.05655	3.9066
Mouth Breathing	19	8	3	1.42672	1.09748	1.5658
Mouth Abnormalities	37	14	4	1.28212	0.836178	1.07208
Motor Skills Disorders	48	20	14	1.41186	2.04864	2.89238
Motor Neuron Disease	179	103	59	1.94978	1.67642	3.26865
Motion Sickness	47	23	16	1.65818	2.03591	3.37591
Morphine Dependence	133	70	43	1.7834	1.79778	3.20616
Morbillivirus Infections	10	6	3	2.03307	1.46331	2.97502
Mood Disorders	150	66	44	1.49092	1.95108	2.90891
Monteggia's Fracture	1	1		3.38846
Monsters	6	3	2	1.69423	1.95108	3.30558
Monosomy	187	92	54	1.66705	1.7178	2.86366
Mononeuropathies	20	12	9	2.03307	2.19497	4.46253
Mononegavirales Infections	1
Monoclonal Gammopathies, Benign	41	21	17	1.73555	2.36917	4.11182
Monieziasis	6	4	4	2.25897	2.92662	6.61116
Molluscum Contagiosum	26	10	8	1.30325	2.3413	3.05131
Mobius Syndrome	9	4	2	1.50598	1.46331	2.20372
Mixed Tumor, Mullerian	54	29	18	1.81973	1.81653	3.30558
Mixed Tumor, Mesodermal	18	10	4	1.88248	1.17065	2.20372
Mixed Tumor, Malignant	30	19	14	2.14602	2.15646	4.62781
Mixed Connective Tissue Disease	115	66	45	1.94468	1.99543	3.88046
Mitral Valve Stenosis	78	39	24	1.69423	1.801	3.05131
Mitral Valve Prolapse	66	26	15	1.33485	1.68844	2.2538
Mitral Valve Insufficiency	107	48	31	1.52006	1.89011	2.87307
Mitochondrial Myopathies	83	49	29	2.00041	1.73208	3.46489
Mitochondrial Encephalomyopathies	51	26	16	1.72745	1.801	3.11113
Mitochondrial Diseases	51	37	22	2.45829	1.74016	4.27781
Mite Infestations	43	25	19	1.97003	2.22423	4.38182
Miosis	13	5	5	1.30325	2.92662	3.81413
Miller Fisher Syndrome	18	7	4	1.31773	1.67236	2.20372
Milk Hypersensitivity	79	37	19	1.587	1.50286	2.38504
Mikulicz' Disease	7	5	4	2.42033	2.3413	5.66671
Migraine	218	104	60	1.61651	1.68844	2.72938
Middle Lobe Syndrome	2
Microvascular Angina	46	21	17	1.5469	2.36917	3.66488
Microstomia	7	1	1	0.484065	2.92662	1.41668
Microsporidiosis	31	18	12	1.96749	1.95108	3.83874
Microphthalmos	139	74	36	1.80393	1.42376	2.56836
Micronuclei, Chromosome-Defective	133	70	39	1.7834	1.63055	2.90792
Micrognathism	36	16	8	1.50598	1.46331	2.20372
Microcephaly	176	73	38	1.40544	1.52345	2.14111
Metrorrhagia	17	3	1	0.597963	0.975542	0.583338
Methemoglobinemia	49	23	16	1.5905	2.03591	3.23812
Metaplasia	336	182	114	1.83541	1.83316	3.36461
Metal Metabolism, Inborn Errors	29	14	7	1.63581	1.46331	2.3937
Metabolism, Inborn Errors	339	185	95	1.84916	1.50286	2.77903
Metabolic Syndrome X	62	36	28	1.96749	2.27626	4.47853
Metabolic Diseases	174	90	58	1.75265	1.88605	3.30558
Mesothelioma, Cystic	4	1		0.847114
Mesothelioma	364	202	125	1.88041	1.81103	3.40547
Mesonephroma	66	38	25	1.95093	1.92541	3.75634
Mesial Movement of Teeth	1
Mesenteric Vascular Occlusion	67	34	26	1.71952	2.23801	3.84829
Mesenteric Lymphadenitis	11	7	5	2.15629	2.09045	4.50761
Mesenteric Cyst	2	2	1	3.38846	1.46331	4.95837
Mesenchymoma	73	40	24	1.85669	1.75597	3.2603
MERRF Syndrome	9	3	3	1.12949	2.92662	3.30558
Mercury Poisoning, Nervous System	8	5	3	2.11779	1.75597	3.71878
Mercury Poisoning	74	38	20	1.74002	1.54033	2.6802
Mental Retardation, X-Linked	28	10	7	1.21016	2.04864	2.47919
Menstruation Disturbances	78	32	16	1.39014	1.46331	2.0342
Menorrhagia	57	20	11	1.18893	1.60964	1.91376
Menopause, Premature	31	12	9	1.31166	2.19497	2.87905
Menkes Kinky Hair Syndrome	57	35	22	2.08063	1.83959	3.82751
Meningomyelocele	57	26	16	1.54561	1.801	2.78365
Meningoencephalitis	96	54	42	1.90601	2.27626	4.33857
Meningococcal Infections	111	60	39	1.8316	1.90231	3.48426
Meningocele	28	9	6	1.08915	1.95108	2.12502
Meningitis, Viral	60	32	25	1.80718	2.28643	4.13198
Meningitis, Pneumococcal	85	47	31	1.87362	1.93033	3.61669
Meningitis, Meningococcal	89	47	28	1.78941	1.74352	3.11987
Meningitis, Listeria	16	10	3	2.11779	0.877987	1.85939
Meningitis, Haemophilus	49	24	15	1.65965	1.82914	3.03574
Meningitis, Fungal	11	9	8	2.77237	2.60144	7.21218
Meningitis, Escherichia coli	11	8	3	2.46433	1.09748	2.70457
Meningitis, Cryptococcal	42	30	20	2.42033	1.95108	4.72226
Meningitis, Bacterial	132	67	42	1.7199	1.8346	3.15533
Meningitis, Aseptic	65	34	19	1.77242	1.63547	2.89874
Meningitis	186	96	64	1.74888	1.95108	3.41221
Meningism	5	1	1	0.677691	2.92662	1.98335
Meningioma	423	223	131	1.78635	1.71923	3.07114
Meningeal Neoplasms	389	206	125	1.7944	1.77586	3.18661
Meniere's Disease	85	37	20	1.47498	1.58196	2.33335
Memory Disorders	217	114	66	1.78011	1.69436	3.01615
Melorheostosis	6	3	2	1.69423	1.95108	3.30558
Melkersson-Rosenthal Syndrome	7	2	2	0.968131	2.92662	2.83335
Melioidosis	43	27	21	2.12764	2.27626	4.84306
Melena	23	9	5	1.32592	1.6259	2.15581
MELAS Syndrome	48	23	12	1.62364	1.52693	2.47919
Melanosis	54	28	17	1.75698	1.77688	3.12194
Melanoma, Amelanotic	58	29	18	1.69423	1.81653	3.07761
Meigs' Syndrome	17	13	9	2.59117	2.02612	5.25004
Meige Syndrome	8	4	1	1.69423	0.731656	1.23959
Megacolon, Toxic	7	4	3	1.93626	2.19497	4.25003
Megacolon	54	27	15	1.69423	1.6259	2.75465
Medulloblastoma	382	214	111	1.89825	1.51802	2.88157
Mediastinitis	23	12	9	1.76789	2.19497	3.88046
Mediastinal Neoplasms	199	110	77	1.87302	2.04864	3.83713
Mediastinal Emphysema	14	4	3	0.968131	2.19497	2.12502
Mediastinal Diseases	27	12	4	1.50598	0.975542	1.46915
Mediastinal Cyst	11	7	5	2.15629	2.09045	4.50761
Median Neuropathy	3	1		1.12949
Meconium Aspiration	26	10	7	1.30325	2.04864	2.66989
Meckel Diverticulum	12	6	4	1.69423	1.95108	3.30558
Measles	172	98	67	1.93063	2.00086	3.86292
Maxillofacial Injuries	14	1	1	0.242033	2.92662	0.708339
Maxillofacial Abnormalities	15	7	6	1.58128	2.50854	3.9667
Maxillary Sinusitis	44	22	16	1.69423	2.12845	3.60609
Maxillary Sinus Neoplasms	59	35	26	2.0101	2.17406	4.37009
Maxillary Neoplasms	71	36	22	1.71809	1.78849	3.07279
Maxillary Fractures	6	2	1	1.12949	1.46331	1.65279
Maxillary Diseases	24	11	8	1.55304	2.12845	3.30558
Mastoiditis	10	7	3	2.37192	1.25427	2.97502
Mastocytosis, Systemic	7	5	3	2.42033	1.75597	4.25003
Mastocytosis, Cutaneous	4	1	1	0.847114	2.92662	2.47919
Mastocytosis	117	59	43	1.70871	2.13296	3.64461
Mastocytoma	18	10	6	1.88248	1.75597	3.30558
Mastitis	73	41	30	1.90311	2.14143	4.07537
Mastigophora Infections	13	7	5	1.82455	2.09045	3.81413
Mast-Cell Sarcoma	332	191	104	1.94938	1.59355	3.10645
Masochism	3	1		1.12949
Marijuana Abuse	42	16	9	1.29084	1.64623	2.12502
Marfan Syndrome	74	35	21	1.60265	1.75597	2.81421
Marek Disease	83	43	29	1.75547	1.97377	3.46489
Marburg Virus Disease	8	7	5	2.9649	2.09045	6.19796
Maple Syrup Urine Disease	34	25	16	2.49151	1.87304	4.6667
Mansonelliasis	11	3	2	0.924125	1.95108	1.80304
Mannosidase Deficiency Diseases	1	1		3.38846
Manganese Poisoning	55	31	21	1.90986	1.98255	3.78639
Mandibulofacial Dysostosis	39	19	8	1.65079	1.23226	2.0342
Mandibular Neoplasms	80	44	28	1.86365	1.8624	3.47086
Mandibular Injuries	8	1	1	0.423557	2.92662	1.23959
Mandibular Fractures	29	15	9	1.75265	1.75597	3.07761
Mandibular Diseases	73	31	14	1.43893	1.3217	1.90184
Mammary Neoplasms, Experimental	950	520	269	1.85473	1.51397	2.808
Mammary Neoplasms, Animal	370	194	110	1.77665	1.65943	2.94822
Malocclusion, Angle Class III	22	8	5	1.23217	1.82914	2.2538
Malocclusion, Angle Class II	29	8	4	0.934747	1.46331	1.36783
Malocclusion, Angle Class I	13	3	3	0.781952	2.92662	2.28848
Malocclusion	95	36	15	1.28405	1.21943	1.5658
Malnutrition	7	4	3	1.93626	2.19497	4.25003
Mallory-Weiss Syndrome	5
Malignant Hyperthermia	88	41	24	1.57871	1.71315	2.70457
Malignant Catarrh	16	12	7	2.54134	1.7072	4.33857
Malignant Carcinoid Syndrome	40	22	14	1.86365	1.8624	3.47086
Malaria, Vivax	98	60	37	2.07457	1.80475	3.74408
Malaria, Falciparum	344	198	112	1.95033	1.65546	3.22871
Malaria, Cerebral	101	58	37	1.94585	1.86698	3.63287
Malaria, Avian	7	5	4	2.42033	2.3413	5.66671
Malaria	450	243	144	1.82977	1.7343	3.17336
Malacoplakia	8	3	2	1.27067	1.95108	2.47919
Malabsorption Syndromes	108	51	31	1.6001	1.77893	2.84647
Magnesium Deficiency	122	64	44	1.77755	2.01205	3.57653
Maduromycosis	25	11	8	1.49092	2.12845	3.17336
Macular Edema, Cystoid	35	14	9	1.35538	1.8814	2.55002
Macular Degeneration	197	103	55	1.77163	1.56276	2.76863
Macrostomia	4
Macroglossia	15	7	7	1.58128	2.92662	4.62781
Machado-Joseph Disease	44	25	13	1.92526	1.52184	2.92995
Lysosomal Storage Diseases	69	41	26	2.01343	1.85591	3.73674
Lymphoproliferative Disorders	418	231	142	1.87257	1.79905	3.36885
Lymphopenia	254	134	89	1.78761	1.9438	3.47476
Lymphomatoid Papulosis	36	18	14	1.69423	2.27626	3.85651
Lymphomatoid Granulomatosis	30	17	12	1.92013	2.06585	3.9667
Lymphoma, Undifferentiated	17	10	7	1.99321	2.04864	4.08336
Lymphoma, T-Cell, Peripheral	102	53	32	1.76067	1.76702	3.11113
Lymphoma, T-Cell, Cutaneous	238	137	84	1.9505	1.79443	3.50003
Lymphoma, Small-Cell	120	59	45	1.66599	2.23217	3.71878
Lymphoma, Small Noncleaved-Cell	28	14	9	1.69423	1.8814	3.18752
Lymphoma, Small Cleaved-Cell, Follicular	33	19	16	1.95093	2.46453	4.80812
Lymphoma, Small Cleaved-Cell, Diffuse	71	41	24	1.95671	1.71315	3.35214
Lymphoma, Mucosa-Associated Lymphoid Tissue	142	73	55	1.74195	2.20499	3.84099
Lymphoma, Mixed-Cell, Follicular	13	6	6	1.5639	2.92662	4.57696
Lymphoma, Mixed-Cell, Diffuse	21	12	8	1.93626	1.95108	3.77781
Lymphoma, Mixed-Cell	22	10	6	1.54021	1.75597	2.70457
Lymphoma, Mantle-Cell	145	88	58	2.05644	1.92891	3.9667
Lymphoma, Lymphoblastic	166	92	66	1.87794	2.09954	3.9428
Lymphoma, Low-Grade	96	51	35	1.80012	2.00847	3.61548
Lymphoma, Large-Cell, Ki-1	141	81	48	1.94656	1.7343	3.37591
Lymphoma, Large-Cell, Follicular	21	12	11	1.93626	2.68274	5.19448
Lymphoma, Large-Cell, Diffuse	270	152	93	1.90758	1.79063	3.41577
Lymphoma, Intermediate-Grade	45	24	18	1.80718	2.19497	3.9667
Lymphoma, High-Grade	113	56	36	1.67924	1.8814	3.15932
Lymphoma, Follicular	226	118	79	1.76919	1.95935	3.46647
Lymphoma, Diffuse	101	52	32	1.74455	1.801	3.14194
Lymphogranuloma Venereum	13	10	6	2.60651	1.75597	4.57696
Lymphocytosis	138	71	55	1.74334	2.2671	3.95232
Lymphocytic Choriomeningitis	148	77	50	1.76291	1.90041	3.35025
Lymphocele	9	5	3	1.88248	1.75597	3.30558
Lymphedema	81	38	22	1.58965	1.69436	2.69344
Lymphatic Vessel Tumors	6	3	1	1.69423	0.975542	1.65279
Lymphatic Metastasis	944	531	309	1.90601	1.70306	3.24605
Lymphatic Diseases	285	162	106	1.92607	1.91495	3.68833
Lymphatic Abnormalities	1
Lymphangitis	16	6	5	1.27067	2.43885	3.09898
Lymphangiosarcoma	8	5	4	2.11779	2.3413	4.95837
Lymphangiomyomatosis	39	20	16	1.73767	2.3413	4.06841
Lymphangiomyoma	18	12	9	2.25897	2.19497	4.95837
Lymphangioma, Cystic	13	3	2	0.781952	1.95108	1.52565
Lymphangioma	50	30	21	2.03307	2.04864	4.16503
Lymphangiectasis, Intestinal	14	7	6	1.69423	2.50854	4.25003
Lymphangiectasis	19	11	8	1.96174	2.12845	4.17547
Lymphadenitis	95	63	44	2.24708	2.04399	4.59302
Lyme Neuroborreliosis	31	23	17	2.51402	2.16316	5.43821
Lyme Disease	188	106	65	1.91051	1.79463	3.42866
Luteoma	24	15	12	2.11779	2.3413	4.95837
Lutembacher's Syndrome	1	1	1	3.38846	2.92662	9.91674
Lupus Vasculitis, Central Nervous System	22	12	7	1.84825	1.7072	3.15533
Lupus Nephritis	282	153	94	1.83842	1.79806	3.30558
Lupus Erythematosus, Discoid	107	58	47	1.83673	2.37158	4.35595
Lupus Erythematosus, Cutaneous	78	46	32	1.99832	2.03591	4.06841
Lupus	74	40	23	1.8316	1.68281	3.08223
Lung, Hyperlucent	1
Lung Diseases, Parasitic	43	22	17	1.73363	2.26148	3.92057
Lung Diseases, Obstructive	325	172	107	1.79328	1.82063	3.2649
Lung Diseases, Interstitial	188	102	70	1.83842	2.00847	3.6924
Lung Diseases, Fungal	122	59	35	1.63868	1.73613	2.84497
Lung Diseases	654	345	206	1.78749	1.74749	3.12362
Lung Abscess	20	11	7	1.86365	1.8624	3.47086
Lumpy Skin Disease	4	3	2	2.54134	1.95108	4.95837
Lown-Ganong-Levine Syndrome	5	4	3	2.71077	2.19497	5.95004
Lower Extremity Deformities, Congenital	1
Low Back Pain	103	47	29	1.54619	1.80579	2.79209
Louping Ill	2	1		1.69423
Lordosis	32	14	11	1.48245	2.29949	3.40888
Long QT Syndrome	127	50	29	1.33404	1.69744	2.26445
Loiasis	26	10	8	1.30325	2.3413	3.05131
Liver Neoplasms, Experimental	1116	653	334	1.98267	1.49693	2.96791
Liver Failure, Acute	97	52	35	1.81649	1.96984	3.57821
Liver Failure	188	106	71	1.91051	1.96029	3.74515
Liver Diseases, Parasitic	106	51	39	1.6303	2.23801	3.64861
Liver Diseases, Alcoholic	269	145	88	1.82649	1.77616	3.24414
Liver Cirrhosis, Experimental	264	136	83	1.74557	1.7861	3.11776
Liver Cirrhosis, Biliary	363	188	116	1.7549	1.80579	3.16899
Liver Cirrhosis, Alcoholic	264	147	94	1.88675	1.87145	3.53096
Liver Cirrhosis	775	422	257	1.84507	1.78233	3.28852
Liver Abscess, Amebic	64	31	20	1.64128	1.88814	3.09898
Liver Abscess	43	20	14	1.57603	2.04864	3.22871
Lithiasis	13	7	6	1.82455	2.50854	4.57696
Listeria Infections	261	146	83	1.89546	1.66377	3.1536
Liposarcoma, Myxoid	38	25	14	2.22925	1.63891	3.65354
Liposarcoma	131	68	49	1.75889	2.10889	3.70932
Lipoprotein Lipase Deficiency, Familial	32	19	13	2.0119	2.00243	4.02868
Lipomatosis, Multiple Symmetrical	14	9	8	2.17829	2.60144	5.66671
Lipomatosis	37	16	11	1.46528	2.01205	2.94822
Lipoma	131	60	41	1.55196	1.99986	3.10371
Lipoidproteinosis	12	5	1	1.41186	0.585325	0.826395
Lipoidosis	83	42	26	1.71464	1.81172	3.10645
Lipodystrophy	110	61	35	1.87905	1.67921	3.15533
Lipid Metabolism, Inborn Errors	136	85	51	2.11779	1.75597	3.71878
Lip Neoplasms	47	26	18	1.87447	2.02612	3.7979
Lip Diseases	26	11	5	1.43358	1.33028	1.90707
Linitis Plastica	4	2	1	1.69423	1.46331	2.47919
Limbic Encephalitis	5	1		0.677691
Limb Deformities, Congenital	216	91	46	1.42754	1.47939	2.1119
Lightning Injuries	3	1		1.12949
Li-Fraumeni Syndrome	56	37	22	2.2388	1.74016	3.89586
Lichenoid Eruptions	40	22	19	1.86365	2.52754	4.71045
Lichen Sclerosus et Atrophicus	54	26	23	1.63148	2.58894	4.2238
Lichen Planus, Oral	93	59	48	2.14967	2.38098	5.11832
Lichen Planus	145	83	61	1.9396	2.15089	4.17187
Lichen Nitidus	1	1	1	3.38846	2.92662	9.91674
Lice Infestations	23	12	9	1.76789	2.19497	3.88046
Leydig Cell Tumor	186	100	60	1.82175	1.75597	3.19895
Lewy Body Disease	58	37	20	2.1616	1.58196	3.41957
Leukostasis	13	9	8	2.34585	2.60144	6.10261
Leukorrhea	6	3	1	1.69423	0.975542	1.65279
Leukoplakia, Oral	104	57	35	1.85713	1.79705	3.33736
Leukoplakia, Hairy	22	15	10	2.31031	1.95108	4.50761
Leukoplakia	47	25	17	1.80237	1.9901	3.58691
Leukopenia	250	125	77	1.69423	1.8028	3.05436
Leukomalacia, Periventricular	38	21	12	1.87257	1.67236	3.1316
Leukoencephalopathy, Progressive Multifocal	78	48	30	2.0852	1.82914	3.81413
Leukoencephalitis, Acute Hemorrhagic	5	4	1	2.71077	0.731656	1.98335
Leukoedema, Oral	3	2	1	2.25897	1.46331	3.30558
Leukodystrophy, Metachromatic	49	27	15	1.86711	1.6259	3.03574
Leukodystrophy, Globoid Cell	68	43	30	2.1427	2.04183	4.37503
Leukocytosis	201	104	73	1.75323	2.05427	3.6016
Leukocyte-Adhesion Deficiency Syndrome	39	28	20	2.43274	2.09045	5.08551
Leukocyte Disorders	9	5	4	1.88248	2.3413	4.40744
Leukemoid Reaction	25	11	9	1.49092	2.39451	3.57003
Leukemic Infiltration	129	63	44	1.65483	2.04399	3.38245
Leukemia-Lymphoma, T-Cell, Acute, HTLV-I-Associated	215	128	81	2.01731	1.852	3.73607
Leukemia, T-Cell, HTLV-II-Associated	7	5	3	2.42033	1.75597	4.25003
Leukemia, T-Cell, Chronic	61	32	25	1.77755	2.28643	4.06424
Leukemia, T-Cell, Acute	475	259	144	1.8476	1.62716	3.00634
Leukemia, T-Cell	540	303	180	1.9013	1.73859	3.30558
Leukemia, Subleukemic	11	4	4	1.23217	2.92662	3.60609
Leukemia, Radiation-Induced	127	63	36	1.68089	1.67236	2.81104
Leukemia, Promyelocytic, Acute	688	406	232	1.99958	1.67236	3.34402
Leukemia, Prolymphocytic	116	62	44	1.81107	2.07696	3.76152
Leukemia, Pre-B-Cell	258	151	94	1.98317	1.82187	3.61308
Leukemia, Plasmacytic	100	55	41	1.86365	2.18167	4.06586
Leukemia, Null-Cell	39	22	20	1.91144	2.66057	5.08551
Leukemia, Nonlymphocytic, Acute	203	103	61	1.71927	1.73324	2.97991
Leukemia, Neutrophilic, Chronic	23	9	7	1.32592	2.27626	3.01814
Leukemia, Myelomonocytic, Chronic	162	85	55	1.77789	1.8937	3.36679
Leukemia, Myelomonocytic, Acute	281	149	89	1.79673	1.74812	3.14089
Leukemia, Myeloid, Philadelphia-Positive	294	160	103	1.84406	1.88401	3.47423
Leukemia, Myeloid, Philadelphia-Negative	44	20	13	1.54021	1.90231	2.92995
Leukemia, Myeloid, Chronic-Phase	98	48	35	1.65965	2.134	3.54169
Leukemia, Myeloid, Chronic	710	383	233	1.82786	1.78043	3.25437
Leukemia, Myeloid, Aggressive-Phase	41	22	16	1.8182	2.12845	3.86995
Leukemia, Myelocytic, Acute	956	533	289	1.88917	1.58686	2.99784
Leukemia, Monocytic, Chronic	135	82	55	2.05817	1.96298	4.04015
Leukemia, Monocytic, Acute	365	206	125	1.91239	1.77586	3.39614
Leukemia, Mixed-Cell	40	16	11	1.35538	2.01205	2.7271
Leukemia, Megakaryocytic, Acute	260	133	76	1.73333	1.67236	2.89874
Leukemia, Mast-Cell	97	54	39	1.88636	2.11367	3.98714
Leukemia, Lymphocytic, Chronic	437	261	166	2.02377	1.86138	3.767
Leukemia, Lymphocytic, Acute, L2	165	86	53	1.7661	1.80362	3.18538
Leukemia, Lymphocytic, Acute, L1	366	187	113	1.73126	1.7685	3.06173
Leukemia, Lymphocytic, Acute	737	396	222	1.82066	1.64068	2.98713
Leukemia, Lymphocytic	633	338	185	1.80932	1.60185	2.89826
Leukemia, Hairy Cell	232	115	70	1.67962	1.78142	2.99212
Leukemia, Feline	13	7	7	1.82455	2.92662	5.33978
Leukemia, Experimental	724	410	215	1.91888	1.53469	2.94489
Leukemia, Erythroblastic, Acute	875	515	283	1.99435	1.60822	3.20736
Leukemia, Eosinophilic, Acute	17	9	7	1.79389	2.27626	4.08336
Leukemia, CALLA-Positive	69	35	19	1.71878	1.58874	2.7307
Leukemia, B-Cell, Acute	275	150	84	1.84825	1.63891	3.02911
Leukemia, B-Cell	291	169	97	1.96787	1.67978	3.30558
Leukemia, Basophilic, Acute	231	138	84	2.02427	1.78142	3.60609
Leukemia P388	294	171	99	1.97084	1.69436	3.33931
Leukemia L5178	144	90	52	2.11779	1.69094	3.58105
Leukemia L1210	434	260	141	2.02995	1.58713	3.2218
Leukemia	1403	777	418	1.87657	1.57443	2.95452
Letterer-Siwe Disease	15	9	5	2.03307	1.6259	3.30558
Lesch-Nyhan Syndrome	66	26	17	1.33485	1.91356	2.55431
Leriche's Syndrome	1	1	1	3.38846	2.92662	9.91674
Leptospirosis	56	33	20	1.99677	1.77371	3.54169
Leprosy, Tuberculoid	75	48	29	2.16861	1.76817	3.83447
Leprosy, Lepromatous	121	66	41	1.84825	1.81805	3.36022
Leprosy, Borderline	40	21	18	1.77894	2.50854	4.46253
Leprosy	303	162	92	1.81165	1.66203	3.01102
Lentivirus Infections	65	41	28	2.13733	1.99867	4.27183
Lentigo	23	11	7	1.62057	1.8624	3.01814
Lens Subluxation	15	5	5	1.12949	2.92662	3.30558
Lens Diseases	35	14	9	1.35538	1.8814	2.55002
Leishmaniasis, Visceral	225	127	82	1.9126	1.88963	3.6141
Leishmaniasis, Mucocutaneous	46	31	25	2.28353	2.36018	5.38953
Leishmaniasis, Diffuse Cutaneous	28	14	11	1.69423	2.29949	3.89586
Leishmaniasis, Cutaneous	218	127	81	1.97401	1.86659	3.68466
Leishmaniasis	161	94	64	1.97835	1.9926	3.94206
Leiomyosarcoma	217	114	73	1.78011	1.87407	3.33605
Leiomyomatosis	46	20	15	1.47324	2.19497	3.23372
Leiomyoma, Epithelioid	14	8	5	1.93626	1.82914	3.54169
Leiomyoma	312	165	110	1.79197	1.95108	3.49629
Leigh Disease	68	43	21	2.1427	1.42928	3.06252
Legionnaires' Disease	92	52	36	1.91521	2.02612	3.88046
Legionellosis	22	13	9	2.00227	2.02612	4.05685
Legg-Perthes Disease	27	11	6	1.38048	1.59634	2.20372
Leg Ulcer	100	50	37	1.69423	2.1657	3.66919
Leg Length Inequality	21	7	4	1.12949	1.67236	1.8889
Leg Injuries	46	18	9	1.32592	1.46331	1.94023
Leg Dermatoses	33	13	9	1.33485	2.02612	2.70457
Lecithin Acyltransferase Deficiency	42	24	18	1.93626	2.19497	4.25003
Learning Disorders	182	89	52	1.65699	1.70994	2.83335
Lead Poisoning, Nervous System, Childhood	7	3	2	1.4522	1.95108	2.83335
Lead Poisoning, Nervous System, Adult	2	1	1	1.69423	2.92662	4.95837
Lead Poisoning, Nervous System	25	12	8	1.62646	1.95108	3.17336
Lead Poisoning	148	79	37	1.8087	1.3707	2.47919
[truncated: 1,985 more rows]
