# Supplementary material for: A Biomedically Enriched Collection of 7000 Human ORF Clones
Source: PLoS One. 2008 Jan 30;3(1):e1528. doi: 10.1371/journal.pone.0001528 (PMC2211400; doi:10.1371/journal.pone.0001528)
Supplement: Table S4 — HFLEX7000 Clone List. Complete listing of all accepted, fully sequence validated ORF clones with Gene Symbol, Entrez GeneID, PlasmID CloneID, Clone GenBank Acc. No., Clone IMAGE ID, and Reference GenBank Acc. No. (1.20 MB XLS) [file pone.0001528.s004.xls]

## Sheet: Supplemental_Table4
Gene Symbol	Entrez GeneID	PLASMID CloneID	Clone ImageID	Clone GenBank Acc. No.	Clone Type	Reference GenBank Acc. No.
COX7A1	1346	HsCD00039496	100008270	DQ893810	FUSION	BC002757.1
COX7A1	1346	HsCD00045563	100006176	DQ893546	CLOSED	BC002757.1
CPA2	1358	HsCD00039497	100008271	DQ893811	FUSION	BC007009.1
COX7A1	1346	HsCD00042652	100003265	DQ890635	CLOSED	BC002757
COX7A1	1346	HsCD00076345	100006548	EU176163	CLOSED	NM_001864.2
CD24	934	HsCD00039498	100008272	DQ893812	FUSION	BC007674.1
CD24	934	HsCD00042653	100003266	DQ890636	CLOSED	BC007674.1
ARHGEF16	27237	HsCD00039499	100008273	DQ893813	FUSION	BC002681.1
ARHGEF16	27237	HsCD00042654	100003267	DQ890637	CLOSED	BC002681.1
FXYD6	53826	HsCD00039500	100008274	DQ893814	FUSION	BC018652.1
FXYD6	53826	HsCD00042655	100003268	DQ890638	CLOSED	BC018652.1
FLOT1	10211	HsCD00039501	100008275	DQ893815	FUSION	BC001146.1
FLOT1	10211	HsCD00042656	100003269	DQ890639	CLOSED	BC001146.1
GPR89A	653519	HsCD00039516	100008290	DQ893830	FUSION	BC003187.1
GPR89A	653519	HsCD00042667	100003280	DQ890650	CLOSED	BC003187.1
RGS1	5996	HsCD00039517	100008291	DQ893831	FUSION	BC015510.1
AKR1B10	57016	HsCD00075905	100011339	EU176471	FUSION	BC008837.1
AKR1B10	57016	HsCD00042695	100003308	DQ890678	CLOSED	BC008837.1
HSF1	3297	HsCD00039545	100008319	DQ893859	FUSION	BC014638.1
AAAS	8086	HsCD00045323	100005936	DQ893306	CLOSED	BC000659.1
AKR1A1	10327	HsCD00039551	100008325	DQ893865	FUSION	BC000670.1
CPB1	1360	HsCD00042564	100003177	DQ890547	CLOSED	BC015338.1
ALKBH1	8846	HsCD00042560	100003173	DQ890543	CLOSED	BC025787.1
COX7B	1349	HsCD00075887	100011330	EU176472	FUSION	BC018386.1
LPL	4023	HsCD00045558	100006171	DQ893541	CLOSED	BC011353.1
SOD2	6648	HsCD00039438	100008212	DQ893752	FUSION	BC012423.1
GPT	2875	HsCD00042613	100003226	DQ890596	CLOSED	BC018207.1
CCNG1	900	HsCD00039451	100008225	DQ893765	FUSION	BC000196.1
IFI27	3429	HsCD00039502	100008276	DQ893816	FUSION	BC015492.1
PLAU	5328	HsCD00039503	100008277	DQ893817	FUSION	BC013575.1
ENO2	2026	HsCD00039505	100008279	DQ893819	FUSION	BC002745.1
COX7A1	1346	HsCD00076403	100006566	EU176164	CLOSED	BC002757.1
EXTL3	2137	HsCD00042715	100003328	DQ890698	CLOSED	BC006363.1
CPB1	1360	HsCD00039392	100008166	DQ893706	FUSION	BC015338.1
CD59	966	HsCD00039504	100008278	DQ893818	FUSION	BC001506.1
CD59	966	HsCD00042657	100003270	DQ890640	CLOSED	BC001506.1
ETS2	2114	HsCD00039523	100008297	DQ893837	FUSION	BC017040.1
COX7A1	1346	HsCD00076405	100006567	EU176165	CLOSED	BC002757.1
ETS2	2114	HsCD00075902	100006337	EU176166	CLOSED	BC017040.1
GSTA4	2941	HsCD00042678	100003291	DQ890661	CLOSED	BC015523.1
DGCR14	8220	HsCD00039528	100008302	DQ893842	FUSION	BC006542.1
RND3	390	HsCD00042682	100003295	DQ890665	CLOSED	NM_005168.3
RND3	390	HsCD00076490	100006613	EU176167	CLOSED	NM_005168.3
RND3	390	HsCD00039533	100008307	DQ893847	FUSION	BC012513.1
TSPAN6	7105	HsCD00039535	100008309	DQ893849	FUSION	BC012389.1
TSPAN6	7105	HsCD00042685	100003298	DQ890668	CLOSED	BC012389.1
KLK2	3817	HsCD00042689	100003302	DQ890672	CLOSED	BC005196.1
IL1B	3553	HsCD00039540	100008314	DQ893854	FUSION	BC008678.1
ENO2	2026	HsCD00075901	100006336	EU176168	CLOSED	BC002745.1
CASP2	835	HsCD00039506	100008280	DQ893820	FUSION	BC002427.1
RGS13	6003	HsCD00042658	100003271	DQ890641	CLOSED	BC056866
RGS13	6003	HsCD00076346	100006549	EU176169	CLOSED	NM_002927.3
RGS13	6003	HsCD00039507	100008281	DQ893821	FUSION	BC016667.1
RGS13	6003	HsCD00042659	100003272	DQ890642	CLOSED	BC016667.1
FADS1	3992	HsCD00039508	100008282	DQ893822	FUSION	BC007846.1
FADS1	3992	HsCD00042660	100003273	DQ890643	CLOSED	BC007846.1
EMP3	2014	HsCD00039509	100008283	DQ893823	FUSION	BC009718.1
EMP3	2014	HsCD00042661	100003274	DQ890644	CLOSED	BC009718.1
TUBA4A	7277	HsCD00039510	100008284	DQ893824	FUSION	BC009238.1
AGR2	10551	HsCD00039511	100008285	DQ893825	FUSION	BC015503.1
AGR2	10551	HsCD00042662	100003275	DQ890645	CLOSED	BC015503.1
PSEN2	5664	HsCD00039512	100008286	DQ893826	FUSION	BC006365.1
PSEN2	5664	HsCD00042663	100003276	DQ890646	CLOSED	BC006365.1
CAV1	857	HsCD00039513	100008287	DQ893827	FUSION	BC009685.1
CAV1	857	HsCD00042664	100003277	DQ890647	CLOSED	BC009685.1
BFAR	51283	HsCD00039514	100008288	DQ893828	FUSION	BC003054.1
BFAR	51283	HsCD00042665	100003278	DQ890648	CLOSED	BC003054.1
KRAS	3845	HsCD00039515	100008289	DQ893829	FUSION	BC013572.1
KRAS	3845	HsCD00042666	100003279	DQ890649	CLOSED	BC013572.1
RGS1	5996	HsCD00042668	100003281	DQ890651	CLOSED	BC015510.1
KRT13	3860	HsCD00039518	100008292	DQ893832	FUSION	BC002661.1
KRT13	3860	HsCD00042669	100003282	DQ890652	CLOSED	BC002661.1
YKT6	10652	HsCD00042670	100003283	DQ890653	CLOSED	BC007319.1
CAV1	857	HsCD00076419	100011615	EU176473	FUSION	BC082246.1
CD59	966	HsCD00076489	100011649	EU176474	FUSION	BC001506.1
NR1H2	7376	HsCD00042671	100003284	DQ890654	CLOSED	BC007790.1
YKT6	10652	HsCD00039519	100008293	DQ893833	FUSION	BC007319
ICT1	3396	HsCD00039520	100008294	DQ893834	FUSION	BC015335.1
ICT1	3396	HsCD00042672	100003285	DQ890655	CLOSED	BC015335.1
GCK	2645	HsCD00039521	100008295	DQ893835	FUSION	BC001890.1
IL24	11009	HsCD00042673	100003286	DQ890656	CLOSED	BC009681.1
IL24	11009	HsCD00039522	100008296	DQ893836	FUSION	BC009681.1
IL24	11009	HsCD00042674	100003287	DQ890657	CLOSED	BC009681.1
HYAL2	8692	HsCD00039524	100008298	DQ893838	FUSION	BC000692.1
GSTM4	2948	HsCD00042675	100003288	DQ890658	CLOSED	BC108729
HYAL2	8692	HsCD00075903	100006338	EU176170	CLOSED	BC000692.1
GSTM4	2948	HsCD00039525	100008299	DQ893839	FUSION	BC015513.1
GSTM4	2948	HsCD00042676	100003289	DQ890659	CLOSED	BC015513.1
CAP1	10487	HsCD00039526	100008300	DQ893840	FUSION	BC013963.1
CAP1	10487	HsCD00042677	100003290	DQ890660	CLOSED	BC013963.1
GSTA4	2941	HsCD00039527	100008301	DQ893841	FUSION	BC015523.1
DGCR14	8220	HsCD00042679	100003292	DQ890662	CLOSED	BC006542.1
IL24	11009	HsCD00039529	100008303	DQ893843	FUSION	BC009681.1
SYF2	25949	HsCD00075904	100011338	EU176475	FUSION	BC010862.1
SYF2	25949	HsCD00042680	100003293	DQ890663	CLOSED	BC010862.1
HCLS1	3059	HsCD00039530	100008304	DQ893844	FUSION	BC016758.1
HCLS1	3059	HsCD00042681	100003294	DQ890664	CLOSED	BC016758.1
KLK6	5653	HsCD00039531	100008305	DQ893845	FUSION	BC015525.1
KLK6	5653	HsCD00045565	100006178	DQ893548	CLOSED	BC015525.1
SFRS4	6429	HsCD00039532	100008306	DQ893846	FUSION	BC002781.1
RND3	390	HsCD00042683	100003296	DQ890666	CLOSED	BC012513.1
NMT2	9397	HsCD00039534	100008308	DQ893848	FUSION	BC006376.1
NMT2	9397	HsCD00042684	100003297	DQ890667	CLOSED	BC006376.1
ALDH1A1	216	HsCD00039536	100008310	DQ893850	FUSION	BC001505.1
ALDH1A1	216	HsCD00042686	100003299	DQ890669	CLOSED	BC001505.1
KLK3	354	HsCD00039537	100008311	DQ893851	FUSION	BC005307.1
KLK3	354	HsCD00042687	100003300	DQ890670	CLOSED	BC005307.1
API5	8539	HsCD00039538	100008312	DQ893852	FUSION	BC017709.1
API5	8539	HsCD00042688	100003301	DQ890671	CLOSED	BC017709.1
KLK2	3817	HsCD00039539	100008313	DQ893853	FUSION	BC005196.1
IL1B	3553	HsCD00042690	100003303	DQ890673	CLOSED	BC008678.1
ETV5	2119	HsCD00039541	100008315	DQ893855	FUSION	BC007333.1
ETV5	2119	HsCD00042691	100003304	DQ890674	CLOSED	BC007333.1
MAOA	4128	HsCD00039543	100008317	DQ893857	FUSION	BC008064.1
MAOA	4128	HsCD00042693	100003306	DQ890676	CLOSED	BC008064.1
KLK5	25818	HsCD00039544	100008318	DQ893858	FUSION	BC008036.1
KLK5	25818	HsCD00042694	100003307	DQ890677	CLOSED	BC008036.1
AKR1C3	8644	HsCD00039546	100008320	DQ893860	FUSION	BC001479.1
AKR1C3	8644	HsCD00042696	100003309	DQ890679	CLOSED	BC001479.1
GRB7	2886	HsCD00039547	100008321	DQ893861	FUSION	BC006535.1
IL1A	3552	HsCD00039542	100008316	DQ893856	FUSION	BC013142.1
IL1A	3552	HsCD00042692	100003305	DQ890675	CLOSED	BC013142.1
AKR1A1	10327	HsCD00042699	100003312	DQ890682	CLOSED	BC000670.1
AKR1A1	10327	HsCD00039456	100008230	DQ893770	FUSION	BC000670
DDX5	1655	HsCD00039460	100008234	DQ893774	FUSION	BC016027.1
DDX5	1655	HsCD00042704	100003317	DQ890687	CLOSED	BC016027.1
ALDH3B2	222	HsCD00039388	100008162	DQ893702	FUSION	BC007685.1
ALDH3B2	222	HsCD00042558	100003171	DQ890541	CLOSED	BC007685.1
BIK	638	HsCD00039431	100008205	DQ893745	FUSION	NM_001197
FHL3	2275	HsCD00042612	100003225	DQ890595	CLOSED	BC011697.1
GPT	2875	HsCD00039450	100008224	DQ893764	FUSION	BC018207.1
CD52	1043	HsCD00039394	100008168	DQ893708	FUSION	BC000644.1
GRB7	2886	HsCD00075906	100006339	EU176171	CLOSED	BC006535.1
AKR1C2	1646	HsCD00039548	100008322	DQ893862	FUSION	BC007024.1
AKR1C2	1646	HsCD00042697	100003310	DQ890680	CLOSED	BC007024.1
LCP2	3937	HsCD00039549	100008323	DQ893863	FUSION	BC016618.1
LCP2	3937	HsCD00042698	100003311	DQ890681	CLOSED	BC016618.1
AAAS	8086	HsCD00039550	100008324	DQ893864	FUSION	BC000659.1
TCP1	6950	HsCD00039457	100008231	DQ893771	FUSION	BC000665.1
TCP1	6950	HsCD00042617	100003230	DQ890600	CLOSED	BC000665.1
CTSH	1512	HsCD00039458	100008232	DQ893772	FUSION	BC002479.1
CTSH	1512	HsCD00042700	100003313	DQ890683	CLOSED	BC002479.1
FMO4	2329	HsCD00039552	100008326	DQ893866	FUSION	BC002780.1
FMO4	2329	HsCD00042701	100003314	DQ890684	CLOSED	BC002780.1
MAGEB1	4112	HsCD00039553	100008327	DQ893867	FUSION	NM_177415
MAGEB1	4112	HsCD00042702	100003315	DQ890685	CLOSED	NM_002363
PDLIM5	10611	HsCD00039554	100008328	DQ893868	FUSION	BC008741.1
PDLIM5	10611	HsCD00042703	100003316	DQ890686	CLOSED	BC008741.1
DNAJB11	51726	HsCD00039555	100008329	DQ893869	FUSION	BC001144.1
DNAJB11	51726	HsCD00042618	100003231	DQ890601	CLOSED	BC001144.1
INHA	3623	HsCD00039459	100008233	DQ893773	FUSION	BC006391.1
INHA	3623	HsCD00042619	100003232	DQ890602	CLOSED	BC006391.1
UROD	7389	HsCD00039556	100008330	DQ893870	FUSION	BC001778.1
UROD	7389	HsCD00042705	100003318	DQ890688	CLOSED	BC001778.1
GLB1	2720	HsCD00039557	100008331	DQ893871	FUSION	BC007493.1
GLB1	2720	HsCD00042706	100003319	DQ890689	CLOSED	BC007493.1
DRG1	4733	HsCD00039558	100008332	DQ893872	FUSION	BC019285.1
DRG1	4733	HsCD00042707	100003320	DQ890690	CLOSED	BC019285.1
COL8A1	1295	HsCD00039559	100008333	DQ893873	FUSION	BC013581.1
ELF3	1999	HsCD00039560	100008334	DQ893874	FUSION	BC003569.1
ELF3	1999	HsCD00042708	100003321	DQ890691	CLOSED	BC003569.1
ABCB7	22	HsCD00075907	100011340	EU176476	FUSION	BC006323.1
ABCB7	22	HsCD00042709	100003322	DQ890692	CLOSED	BC006323.1
HTR1D	3352	HsCD00039561	100008335	DQ893875	FUSION	BC007720.1
HTR1D	3352	HsCD00076406	100006568	EU176172	CLOSED	BC007720.1
MARK2	2011	HsCD00039562	100008336	DQ893876	FUSION	BC008771.1
MARK2	2011	HsCD00042710	100003323	DQ890693	CLOSED	BC008771.1
SERPINE1	5054	HsCD00039563	100008337	DQ893877	FUSION	BC010860.1
SERPINE1	5054	HsCD00042711	100003324	DQ890694	CLOSED	BC010860.1
ADAM15	8751	HsCD00075908	100006340	EU176173	CLOSED	BC014566.1
CTSD	1509	HsCD00039564	100008338	DQ893878	FUSION	BC016320.1
CTSD	1509	HsCD00045564	100006177	DQ893547	CLOSED	BC016320.1
LDLR	3949	HsCD00039565	100008339	DQ893879	FUSION	BC014514.1
CSNK1G2	1455	HsCD00039566	100008340	DQ893880	FUSION	BC020972.1
CSNK1G2	1455	HsCD00042712	100003325	DQ890695	CLOSED	BC020972.1
TAOK3	51347	HsCD00039567	100008341	DQ893881	FUSION	BC002756.1
TAOK3	51347	HsCD00042713	100003326	DQ890696	CLOSED	BC002756.1
FDFT1	2222	HsCD00039568	100008342	DQ893882	FUSION	BC003573.1
FDFT1	2222	HsCD00042714	100003327	DQ890697	CLOSED	BC003573.1
EXTL3	2137	HsCD00039569	100008343	DQ893883	FUSION	BC006363.1
UBE1L	7318	HsCD00039393	100008167	DQ893707	FUSION	BC006378.1
UBE1L	7318	HsCD00045324	100005937	DQ893307	CLOSED	BC006378.1
MT1X	4501	HsCD00039386	100008160	DQ893700	FUSION	BC018190.1
MT1X	4501	HsCD00042555	100003168	DQ890538	CLOSED	BC018190.1
CKM	1158	HsCD00039387	100008161	DQ893701	FUSION	BC007462.1
CKM	1158	HsCD00042556	100003169	DQ890539	CLOSED	BC007462.1
MT1G	4495	HsCD00075886	100011329	EU176477	FUSION	BC020757.1
MT1G	4495	HsCD00042557	100003170	DQ890540	CLOSED	BC020757.1
COX6C	1345	HsCD00042483	100011257	DQ896797	FUSION	BC000187.1
COX6C	1345	HsCD00042559	100003172	DQ890542	CLOSED	BC000187.1
ALKBH1	8846	HsCD00039389	100008163	DQ893703	FUSION	BC025787.1
COX7B	1349	HsCD00042561	100003174	DQ890544	CLOSED	BC018386.1
PSMC6	5706	HsCD00039390	100008164	DQ893704	FUSION	BC005390.1
DEFA3	1668	HsCD00042562	100003175	DQ890545	CLOSED	BC027917.1
DEFA3	1668	HsCD00076348	100006551	EU176174	CLOSED	NM_005217.2
DEFA3	1668	HsCD00042484	100011258	DQ896798	FUSION	BC027917.1
DEFA3	1668	HsCD00042563	100003176	DQ890546	CLOSED	BC027917.1
CHI3L2	1117	HsCD00039391	100008165	DQ893705	FUSION	BC011460.1
PPY	5539	HsCD00039407	100008181	DQ893721	FUSION	BC032225.2
PPY	5539	HsCD00042576	100003189	DQ890559	CLOSED	BC032225.2
SERPINB3	6317	HsCD00039408	100008182	DQ893722	FUSION	BC005224.1
SERPINB3	6317	HsCD00042577	100003190	DQ890560	CLOSED	BC005224.1
COX6A2	1339	HsCD00039409	100008183	DQ893723	FUSION	BC029818.1
COX6A2	1339	HsCD00042578	100003191	DQ890561	CLOSED	BC029818.1
MVD	4597	HsCD00039410	100008184	DQ893724	FUSION	BC000011.1
MVD	4597	HsCD00042579	100003192	DQ890562	CLOSED	BC000011.1
CCL2	6347	HsCD00039411	100008185	DQ893725	FUSION	BC009716.1
CCL2	6347	HsCD00075888	100006330	EU176175	CLOSED	BC009716.1
RAD23B	5887	HsCD00039412	100008186	DQ893726	FUSION	BC020973.1
RAD23B	5887	HsCD00042580	100003193	DQ890563	CLOSED	BC020973.1
IL8	3576	HsCD00039413	100008187	DQ893727	FUSION	BC013615.1
IL8	3576	HsCD00042581	100003194	DQ890564	CLOSED	BC013615.1
CPA1	1357	HsCD00039414	100008188	DQ893728	FUSION	BC005279.1
CPA1	1357	HsCD00042582	100003195	DQ890565	CLOSED	BC005279.1
COX7A2L	9167	HsCD00039415	100008189	DQ893729	FUSION	BC005251.1
COX7A2L	9167	HsCD00042583	100003196	DQ890566	CLOSED	BC005251.1
CPB2	1361	HsCD00075889	100011331	EU176478	FUSION	BC007057.1
CPB2	1361	HsCD00042584	100003197	DQ890567	CLOSED	BC007057.1
CCK	885	HsCD00075890	100011332	EU176479	FUSION	BC008283.1
CCK	885	HsCD00042585	100003198	DQ890568	CLOSED	BC008283.1
AHCY	191	HsCD00039416	100008190	DQ893730	FUSION	BC010018.1
AHCY	191	HsCD00042586	100003199	DQ890569	CLOSED	BC010018.1
EIF4EBP1	1978	HsCD00039417	100008191	DQ893731	FUSION	BC004459.1
EIF4EBP1	1978	HsCD00042587	100003200	DQ890570	CLOSED	BC004459.1
VIPR2	7434	HsCD00039418	100008192	DQ893732	FUSION	BC010569.1
VIPR2	7434	HsCD00042588	100003201	DQ890571	CLOSED	BC010569.1
COX5B	1329	HsCD00075891	100011333	EU176480	FUSION	BC006229.1
COX5B	1329	HsCD00042589	100003202	DQ890572	CLOSED	BC006229.1
GDI2	2665	HsCD00039419	100008193	DQ893733	FUSION	BC005145.1
GDI2	2665	HsCD00042590	100003203	DQ890573	CLOSED	BC005145.1
MGC22265	349035	HsCD00039420	100008194	DQ893734	FUSION	BC034017
MGC22265	349035	HsCD00042591	100003204	DQ890574	CLOSED	BC034017
STARD3	10948	HsCD00039421	100008195	DQ893735	FUSION	BC008747.1
STARD3	10948	HsCD00042592	100003205	DQ890575	CLOSED	BC008747.1
EIF1AY	9086	HsCD00039422	100008196	DQ893736	FUSION	BC005248.1
EIF1AY	9086	HsCD00042593	100003206	DQ890576	CLOSED	BC005248.1
CCKBR	887	HsCD00039423	100008197	DQ893737	FUSION	BC000740.1
CCKBR	887	HsCD00042594	100003207	DQ890577	CLOSED	BC000740.1
BIK	638	HsCD00039424	100008198	DQ893738	FUSION	BC001599.1
BIK	638	HsCD00042595	100003208	DQ890578	CLOSED	BC001599.1
TUBA1A	7846	HsCD00075892	100011334	EU176481	FUSION	BC006468.1
TUBA1A	7846	HsCD00042596	100003209	DQ890579	CLOSED	BC006468.1
TAF12	6883	HsCD00039425	100008199	DQ893739	FUSION	BC011986.1
TAF12	6883	HsCD00042597	100003210	DQ890580	CLOSED	BC011986.1
KLF5	688	HsCD00039426	100008200	DQ893740	FUSION	BC007695.1
KLF5	688	HsCD00042598	100003211	DQ890581	CLOSED	BC007695.1
PMF1	11243	HsCD00039427	100008201	DQ893741	FUSION	BC033656.2
PMF1	11243	HsCD00042599	100003212	DQ890582	CLOSED	BC033656.2
GALK2	2585	HsCD00039428	100008202	DQ893742	FUSION	BC005141.1
GALK2	2585	HsCD00042600	100003213	DQ890583	CLOSED	BC005141.1
MAL2	114569	HsCD00039429	100008203	DQ893743	FUSION	BC012367.1
MAL2	114569	HsCD00042601	100003214	DQ890584	CLOSED	BC012367.1
RARA	5914	HsCD00039430	100008204	DQ893744	FUSION	BC008727.1
RARA	5914	HsCD00045548	100006161	DQ893531	CLOSED	BC008727.1
SMAD2	4087	HsCD00039432	100008206	DQ893746	FUSION	BC025699
SMAD2	4087	HsCD00045549	100006162	DQ893532	CLOSED	BC025699
FXYD5	53827	HsCD00039433	100008207	DQ893747	FUSION	BC009642.1
FXYD5	53827	HsCD00042602	100003215	DQ890585	CLOSED	BC009642.1
FMO2	2327	HsCD00039434	100008208	DQ893748	FUSION	BC005894.1
FMO2	2327	HsCD00045550	100006163	DQ893533	CLOSED	BC005894.1
PSMB2	5690	HsCD00045556	100006169	DQ893539	CLOSED	BC000268.1
PCTK3	5129	HsCD00039435	100008209	DQ893749	FUSION	BC011526.1
PCTK3	5129	HsCD00045557	100006170	DQ893540	CLOSED	BC011526.1
RAB35	11021	HsCD00039436	100008210	DQ893750	FUSION	BC015931.1
RAB35	11021	HsCD00042603	100003216	DQ890586	CLOSED	BC015931.1
LPL	4023	HsCD00039437	100008211	DQ893751	FUSION	BC011353.1
SOD2	6648	HsCD00042604	100003217	DQ890587	CLOSED	BC012423.1
CAP2	10486	HsCD00039439	100008213	DQ893753	FUSION	BC008481.1
CAP2	10486	HsCD00042605	100003218	DQ890588	CLOSED	BC008481.1
PSMA7	5688	HsCD00039440	100008214	DQ893754	FUSION	BC004427.1
PSMA7	5688	HsCD00042606	100003219	DQ890589	CLOSED	BC004427.1
IFIT1	3434	HsCD00039441	100008215	DQ893755	FUSION	BC007091.1
IFIT1	3434	HsCD00045551	100006164	DQ893534	CLOSED	BC007091.1
RAB34	83871	HsCD00039442	100008216	DQ893756	FUSION	BC016841.1
RAB34	83871	HsCD00042607	100003220	DQ890590	CLOSED	BC016841.1
SCARB2	950	HsCD00039443	100008217	DQ893757	FUSION	BC021892.1
SCARB2	950	HsCD00045552	100006165	DQ893535	CLOSED	BC021892.1
SPIN1	10927	HsCD00042486	100011260	DQ896800	FUSION	BC013571.1
SPIN1	10927	HsCD00045553	100006166	DQ893536	CLOSED	BC013571.1
PI4KII	55361	HsCD00039444	100008218	DQ893758	FUSION	BC003167.1
PI4KII	55361	HsCD00045554	100006167	DQ893537	CLOSED	BC003167.1
ITM2B	9445	HsCD00039445	100008219	DQ893759	FUSION	BC016148.1
ITM2B	9445	HsCD00042608	100003221	DQ890591	CLOSED	BC016148.1
CFLAR	8837	HsCD00039446	100008220	DQ893760	FUSION	BC001602.1
CFLAR	8837	HsCD00042609	100003222	DQ890592	CLOSED	BC001602.1
HOXA5	3202	HsCD00039447	100008221	DQ893761	FUSION	BC013682.1
HOXA5	3202	HsCD00042610	100003223	DQ890593	CLOSED	BC013682.1
USP14	9097	HsCD00039448	100008222	DQ893762	FUSION	BC003556.1
USP14	9097	HsCD00042611	100003224	DQ890594	CLOSED	BC003556.1
FHL3	2275	HsCD00039449	100008223	DQ893763	FUSION	BC011697.1
CCNG1	900	HsCD00075893	100006331	EU176176	CLOSED	BC000196.1
GTF2F1	2962	HsCD00039452	100008226	DQ893766	FUSION	BC000120.1
GTF2F1	2962	HsCD00042614	100003227	DQ890597	CLOSED	BC000120.1
CDK2	1017	HsCD00039453	100008227	DQ893767	FUSION	BC003065.1
CDK2	1017	HsCD00042615	100003228	DQ890598	CLOSED	BC003065.1
KPNA2	3838	HsCD00039454	100008228	DQ893768	FUSION	BC005978.1
KPNA2	3838	HsCD00042616	100003229	DQ890599	CLOSED	BC005978.1
CASP7	840	HsCD00039455	100008229	DQ893769	FUSION	BC015799.1
CASP7	840	HsCD00042631	100003244	DQ890614	CLOSED	BC015799.1
ICAM1	3383	HsCD00039471	100008245	DQ893785	FUSION	BC015969.1
ICAM1	3383	HsCD00042632	100003245	DQ890615	CLOSED	BC015969.1
EIF3G	8666	HsCD00042487	100011261	DQ896801	FUSION	BC000733.1
EIF3G	8666	HsCD00042633	100003246	DQ890616	CLOSED	BC000733.1
PGM1	5236	HsCD00039472	100008246	DQ893786	FUSION	BC001756.1
CD86	942	HsCD00042634	100003247	DQ890617	CLOSED	BC040261.1
CD86	942	HsCD00039473	100008247	DQ893787	FUSION	BC040261.1
PGM1	5236	HsCD00042635	100003248	DQ890618	CLOSED	M83088
KRT6A	3853	HsCD00039474	100008248	DQ893788	FUSION	BC008807.1
KRT6A	3853	HsCD00042636	100003249	DQ890619	CLOSED	BC008807.1
CA14	23632	HsCD00039475	100008249	DQ893789	FUSION	BC034412.1
CA14	23632	HsCD00042637	100003250	DQ890620	CLOSED	BC034412.1
CDC45L	8318	HsCD00039476	100008250	DQ893790	FUSION	BC010022.1
CDC45L	8318	HsCD00042638	100003251	DQ890621	CLOSED	BC010022.1
KIR2DL3	3804	HsCD00039477	100008251	DQ893791	FUSION	BC032422.1
KIR2DL3	3804	HsCD00042639	100003252	DQ890622	CLOSED	BC032422.1
SEPT9	10801	HsCD00039478	100008252	DQ893792	FUSION	BC021192.1
SEPT9	10801	HsCD00042640	100003253	DQ890623	CLOSED	BC021192.1
CCK	885	HsCD00076409	100011612	EU176482	FUSION	BC093055.1
ADK	132	HsCD00075894	100011335	EU176483	FUSION	BC003568.1
ADK	132	HsCD00042641	100003254	DQ890624	CLOSED	BC003568.1
PFAAP5	10443	HsCD00075895	100011336	EU176484	FUSION	BC010643.1
PFAAP5	10443	HsCD00042642	100003255	DQ890625	CLOSED	BC010643.1
GPD1	2819	HsCD00039479	100008253	DQ893793	FUSION	BC032234.1
GPD1	2819	HsCD00042643	100003256	DQ890626	CLOSED	BC032234.1
CANX	821	HsCD00039480	100008254	DQ893794	FUSION	BC003552.1
CANX	821	HsCD00042644	100003257	DQ890627	CLOSED	BC003552.1
MCL1	4170	HsCD00039481	100008255	DQ893795	FUSION	BC017197.1
MCL1	4170	HsCD00042645	100003258	DQ890628	CLOSED	BC017197.1
PIAS3	10401	HsCD00039482	100008256	DQ893796	FUSION	BC030556.1
PIAS3	10401	HsCD00045559	100006172	DQ893542	CLOSED	BC030556.1
ZPBP	11055	HsCD00039483	100008257	DQ893797	FUSION	BC005223.1
ZPBP	11055	HsCD00042646	100003259	DQ890629	CLOSED	BC005223.1
CXXC1	30827	HsCD00039484	100008258	DQ893798	FUSION	BC014940.1
LTB4R	1241	HsCD00075896	100006332	EU176177	CLOSED	BC004545.1
KIF2C	11004	HsCD00039486	100008260	DQ893800	FUSION	BC014924.1
KIF2C	11004	HsCD00075897	100006333	EU176178	CLOSED	BC014924.1
CD68	968	HsCD00039487	100008261	DQ893801	FUSION	BC015557.1
CD68	968	HsCD00042648	100003261	DQ890631	CLOSED	BC015557.1
ERCC3	2071	HsCD00039488	100008262	DQ893802	FUSION	BC008820.1
ERCC3	2071	HsCD00075898	100006334	EU176179	CLOSED	BC008820.1
CCNK	8812	HsCD00075899	100011337	EU176485	FUSION	BC015935.1
CCNK	8812	HsCD00045555	100006168	DQ893538	CLOSED	BC015935.1
PCSK7	9159	HsCD00039489	100008263	DQ893803	FUSION	BC010696.1
PCSK7	9159	HsCD00042649	100003262	DQ890632	CLOSED	BC010696.1
NFKBIB	4793	HsCD00039490	100008264	DQ893804	FUSION	BC015528.1
NFKBIB	4793	HsCD00042650	100003263	DQ890633	CLOSED	BC015528.1
RNF10	9921	HsCD00039491	100008265	DQ893805	FUSION	BC016622.1
RNF10	9921	HsCD00042651	100003264	DQ890634	CLOSED	BC016622.1
RFC4	5984	HsCD00039492	100008266	DQ893806	FUSION	BC024022
RFC4	5984	HsCD00045560	100006173	DQ893543	CLOSED	BC024022
CDH16	1014	HsCD00039493	100008267	DQ893807	FUSION	BC027912.2
CDH16	1014	HsCD00075900	100006335	EU176180	CLOSED	BC027912.2
FCGRT	2217	HsCD00039494	100008268	DQ893808	FUSION	BC008734.1
FCGRT	2217	HsCD00045561	100006174	DQ893544	CLOSED	BC008734.1
NCKAP1	10787	HsCD00039495	100008269	DQ893809	FUSION	BC015025.1
NCKAP1	10787	HsCD00045562	100006175	DQ893545	CLOSED	BC015025.1
FAIM3	9214	HsCD00042716	100003329	DQ890699	CLOSED	BC006401.1
NAP1L1	4673	HsCD00039571	100008345	DQ893885	FUSION	BC002387.1
NAP1L1	4673	HsCD00042718	100003331	DQ890701	CLOSED	BC002387.1
FGF12	2257	HsCD00042621	100003234	DQ890604	CLOSED	BC022524.1
PAICS	10606	HsCD00039462	100008236	DQ893776	FUSION	BC010273
HOXB6	3216	HsCD00042749	100003362	DQ890732	CLOSED	BC014651.1
KRT14	3861	HsCD00039591	100008365	DQ893905	FUSION	BC019097.1
CD7	924	HsCD00042757	100003370	DQ890740	CLOSED	BC009293.1
DARS	1615	HsCD00039598	100008372	DQ893912	FUSION	BC000629.1
KLK7	5650	HsCD00042763	100003376	DQ890746	CLOSED	BC032005.1
SPINT1	6692	HsCD00042764	100003377	DQ890747	CLOSED	BC018702
TARBP2	6895	HsCD00045566	100006179	DQ893549	CLOSED	BC005860.1
KIF22	3835	HsCD00039618	100008392	DQ893932	FUSION	BC028155
BIRC4	331	HsCD00042874	100003487	DQ890857	CLOSED	BC032729.1
ID2	3398	HsCD00039699	100008473	DQ894013	FUSION	BC030639.1
CKS1B	1163	HsCD00039570	100008344	DQ893884	FUSION	BC015629.1
MMP1	4312	HsCD00039590	100008364	DQ893904	FUSION	BC013875.1
MMP1	4312	HsCD00042746	100003359	DQ890729	CLOSED	BC013875.1
CARS	833	HsCD00042790	100003403	DQ890773	CLOSED	BC002880.1
NGB	58157	HsCD00039702	100008476	DQ894016	FUSION	BC032509.1
NGB	58157	HsCD00042878	100003491	DQ890861	CLOSED	BC032509.1
FNDC4	64838	HsCD00075925	100006350	EU176181	CLOSED	BC032725.1
GMCL1L	64396	HsCD00039709	100008483	DQ894023	FUSION	BC024184.1
ELF2	1998	HsCD00042887	100003500	DQ890870	CLOSED	BC034951.1
PENK	5179	HsCD00039713	100008487	DQ894027	FUSION	BC032505.1
PENK	5179	HsCD00042888	100003501	DQ890871	CLOSED	BC032505.1
CKS1B	1163	HsCD00042717	100003330	DQ890700	CLOSED	BC015629.1
IL1F5	26525	HsCD00039572	100008346	DQ893886	FUSION	BC024747.1
IL1F5	26525	HsCD00042719	100003332	DQ890702	CLOSED	BC024747.1
NAP1L1	4673	HsCD00045567	100006180	DQ893550	CLOSED	M86667
GALK1	2584	HsCD00076491	100006614	EU176182	CLOSED	BC001166.1
NCBP2	22916	HsCD00039573	100008347	DQ893887	FUSION	BC001255.1
NCBP2	22916	HsCD00042720	100003333	DQ890703	CLOSED	BC001255.1
CX3CL1	6376	HsCD00039574	100008348	DQ893888	FUSION	BC016164
CX3CL1	6376	HsCD00042721	100003334	DQ890704	CLOSED	BC016164
AP1S2	8905	HsCD00039575	100008349	DQ893889	FUSION	BC001117.1
AP1S2	8905	HsCD00042722	100003335	DQ890705	CLOSED	BC001117.1
ETF1	2107	HsCD00039576	100008350	DQ893890	FUSION	BC014269.1
ETF1	2107	HsCD00042723	100003336	DQ890706	CLOSED	BC014269.1
AP4S1	11154	HsCD00039577	100008351	DQ893891	FUSION	BC001259.1
AP4S1	11154	HsCD00042724	100003337	DQ890707	CLOSED	BC001259.1
INHBB	3625	HsCD00042725	100003338	DQ890708	CLOSED	BC030029.1
MAFG	4097	HsCD00042726	100003339	DQ890709	CLOSED	BC012327.1
IL15	3600	HsCD00039395	100008169	DQ893709	FUSION	BC100963
BMP4	652	HsCD00075909	100006341	EU176183	CLOSED	BC020546.1
IL15	3600	HsCD00039396	100008170	DQ893710	FUSION	BC018149.2
IL15	3600	HsCD00042565	100003178	DQ890548	CLOSED	BC018149.2
COX15	1355	HsCD00039578	100008352	DQ893892	FUSION	BC002382.1
COX15	1355	HsCD00042727	100003340	DQ890710	CLOSED	BC002382.1
CHIC2	26511	HsCD00039579	100008353	DQ893893	FUSION	BC034691.1
CHIC2	26511	HsCD00042728	100003341	DQ890711	CLOSED	BC034691.1
SMARCE1	6605	HsCD00039580	100008354	DQ893894	FUSION	BC011017
SMARCE1	6605	HsCD00042729	100003342	DQ890712	CLOSED	BC011017
TSPO	706	HsCD00042730	100003343	DQ890713	CLOSED	BC001110.1
CKS1B	1163	HsCD00076492	100011650	EU176486	FUSION	BC015629.1
DPEP1	1800	HsCD00042731	100003344	DQ890714	CLOSED	BC017023.1
PTP4A1	7803	HsCD00039581	100008355	DQ893895	FUSION	BC023975.2
PTP4A1	7803	HsCD00042732	100003345	DQ890715	CLOSED	BC023975.2
NEU1	4758	HsCD00039582	100008356	DQ893896	FUSION	BC011900.1
NEU1	4758	HsCD00042733	100003346	DQ890716	CLOSED	BC011900.1
REG3A	5068	HsCD00039583	100008357	DQ893897	FUSION	BC036776.1
REG3A	5068	HsCD00042734	100003347	DQ890717	CLOSED	BC036776.1
RAB35	11021	HsCD00042620	100003233	DQ890603	CLOSED	BC015931
FGF12	2257	HsCD00039461	100008235	DQ893775	FUSION	BC022524.1
PAICS	10606	HsCD00042622	100003235	DQ890605	CLOSED	BC010273
SDC4	6385	HsCD00039584	100008358	DQ893898	FUSION	BC030805.1
SDC4	6385	HsCD00042735	100003348	DQ890718	CLOSED	BC030805.1
CKS1B	1163	HsCD00076389	100011596	EU176487	FUSION	BC070319.1
DDB2	1643	HsCD00042736	100003349	DQ890719	CLOSED	BC000093.1
IL17D	53342	HsCD00042737	100003350	DQ890720	CLOSED	BC036243.1
GLA	2717	HsCD00039585	100008359	DQ893899	FUSION	BC002689.1
GLA	2717	HsCD00042738	100003351	DQ890721	CLOSED	BC002689.1
EFNA1	1942	HsCD00039586	100008360	DQ893900	FUSION	BC032698.1
EFNA1	1942	HsCD00042739	100003352	DQ890722	CLOSED	BC032698.1
MYLIP	29116	HsCD00075910	100006342	EU176184	CLOSED	BC002860.1
MGMT	4255	HsCD00039587	100008361	DQ893901	FUSION	BC000824.1
MGMT	4255	HsCD00042740	100003353	DQ890723	CLOSED	BC000824.1
AZIN1	51582	HsCD00042741	100003354	DQ890724	CLOSED	BC019279
FADD	8772	HsCD00075911	100006343	EU176185	CLOSED	BC000334.1
CHRM1	1128	HsCD00042742	100003355	DQ890725	CLOSED	BC022984
	84558	HsCD00042743	100003356	DQ890726	CLOSED	BC017214.1
HNRPK	3190	HsCD00039588	100008362	DQ893902	FUSION	BC000355.1
HNRPK	3190	HsCD00042744	100003357	DQ890727	CLOSED	BC000355.1
EIF4E	1977	HsCD00039589	100008363	DQ893903	FUSION	BC012611.1
EIF4E	1977	HsCD00042745	100003358	DQ890728	CLOSED	BC012611.1
RRAS	6237	HsCD00042747	100003360	DQ890730	CLOSED	BC016318
SELENBP1	8991	HsCD00042748	100003361	DQ890731	CLOSED	BC009084.1
KRT14	3861	HsCD00042750	100003363	DQ890733	CLOSED	BC019097.1
FKBP3	2287	HsCD00039592	100008366	DQ893906	FUSION	BC020809
FKBP3	2287	HsCD00042751	100003364	DQ890734	CLOSED	BC020809
ABI2	10152	HsCD00039593	100008367	DQ893907	FUSION	BC001439.1
ABI2	10152	HsCD00042752	100003365	DQ890735	CLOSED	BC001439.1
SOX15	6665	HsCD00039594	100008368	DQ893908	FUSION	BC000985.2
SOX15	6665	HsCD00042753	100003366	DQ890736	CLOSED	BC000985.2
RNF8	9025	HsCD00039595	100008369	DQ893909	FUSION	BC007517.1
RNF8	9025	HsCD00042754	100003367	DQ890737	CLOSED	BC007517.1
CDC34	997	HsCD00039596	100008370	DQ893910	FUSION	BC023979
CDC34	997	HsCD00042755	100003368	DQ890738	CLOSED	BC023979
FZR1	51343	HsCD00042756	100003369	DQ890739	CLOSED	BC013413.1
CD7	924	HsCD00039597	100008371	DQ893911	FUSION	BC009293.1
DARS	1615	HsCD00042758	100003371	DQ890741	CLOSED	BC000629.1
CYP3A5	1577	HsCD00039599	100008373	DQ893913	FUSION	BC033862.1
CYP3A5	1577	HsCD00076374	100011581	EU176488	FUSION	NM_000777.2
GSTT2	2953	HsCD00042759	100003372	DQ890742	CLOSED	BC002415.1
CYP3A5	1577	HsCD00042488	100011262	DQ896802	FUSION	BC033862.1
CYP3A5	1577	HsCD00042760	100003373	DQ890743	CLOSED	BC033862.1
RNF138	51444	HsCD00039600	100008374	DQ893914	FUSION	BC018107.1
RNF138	51444	HsCD00042761	100003374	DQ890744	CLOSED	BC018107.1
FARSA	2193	HsCD00039601	100008375	DQ893915	FUSION	BC006495.1
FARSA	2193	HsCD00042762	100003375	DQ890745	CLOSED	BC006495.1
KLK7	5650	HsCD00039602	100008376	DQ893916	FUSION	BC032005.1
PSMB4	5692	HsCD00042765	100003378	DQ890748	CLOSED	BC012168.1
ALDH1B1	219	HsCD00075912	100011341	EU176489	FUSION	BC001619.1
ALDH1B1	219	HsCD00042766	100003379	DQ890749	CLOSED	BC001619.1
KLK10	5655	HsCD00039603	100008377	DQ893917	FUSION	BC002710.1
KLK10	5655	HsCD00042767	100003380	DQ890750	CLOSED	BC002710.1
SNX1	6642	HsCD00039604	100008378	DQ893918	FUSION	BC000357.1
SNX1	6642	HsCD00042768	100003381	DQ890751	CLOSED	BC000357.1
KLF6	1316	HsCD00042769	100003382	DQ890752	CLOSED	BC000311.1
CDC25A	993	HsCD00042770	100003383	DQ890753	CLOSED	BC018642.1
CAPZA1	829	HsCD00039605	100008379	DQ893919	FUSION	BC000144.1
CAPZA1	829	HsCD00042771	100003384	DQ890754	CLOSED	BC000144.1
DPYSL5	56896	HsCD00042772	100003385	DQ890755	CLOSED	BC002874.1
CD47	961	HsCD00039606	100008380	DQ893920	FUSION	BC037306
CD47	961	HsCD00042773	100003386	DQ890756	CLOSED	BC037306
MEN1	4221	HsCD00042774	100003387	DQ890757	CLOSED	BC002544.1
AKR1B1	231	HsCD00039607	100008381	DQ893921	FUSION	BC010391
AKR1B1	231	HsCD00042775	100003388	DQ890758	CLOSED	BC010391
PRKCZ	5590	HsCD00039608	100008382	DQ893922	FUSION	BC014270.1
AKR1C1	1645	HsCD00039609	100008383	DQ893923	FUSION	BC020216
GBP1	2633	HsCD00039610	100008384	DQ893924	FUSION	BC002666.1
GBP1	2633	HsCD00042776	100003389	DQ890759	CLOSED	BC002666.1
P2RY6	5031	HsCD00042777	100003390	DQ890760	CLOSED	BC009391.1
RAP1GDS1	5910	HsCD00042778	100003391	DQ890761	CLOSED	BC001816.1
MEST	4232	HsCD00039611	100008385	DQ893925	FUSION	BC011908.1
MEST	4232	HsCD00042779	100003392	DQ890762	CLOSED	BC011908.1
GNL1	2794	HsCD00039612	100008386	DQ893926	FUSION	BC018366
GNL1	2794	HsCD00042780	100003393	DQ890763	CLOSED	BC018366
PRKACG	5568	HsCD00039613	100008387	DQ893927	FUSION	BC039888.1
PRKACG	5568	HsCD00042781	100003394	DQ890764	CLOSED	BC039888.1
NDC80	10403	HsCD00039614	100008388	DQ893928	FUSION	BC035617.1
NDC80	10403	HsCD00042782	100003395	DQ890765	CLOSED	BC035617.1
EIF3F	8665	HsCD00042783	100003396	DQ890766	CLOSED	BC000490.1
KATNB1	10300	HsCD00042784	100003397	DQ890767	CLOSED	BC001353.1
DRG2	1819	HsCD00039615	100008389	DQ893929	FUSION	BC000493.1
DRG2	1819	HsCD00042785	100003398	DQ890768	CLOSED	BC000493.1
TNFRSF21	27242	HsCD00039616	100008390	DQ893930	FUSION	BC017730.1
TNFRSF21	27242	HsCD00042786	100003399	DQ890769	CLOSED	BC017730.1
WNT6	7475	HsCD00042787	100003400	DQ890770	CLOSED	BC004329.1
SILV	6490	HsCD00075913	100006344	EU176186	CLOSED	BC001414.1
TARBP2	6895	HsCD00039617	100008391	DQ893931	FUSION	BC005860.1
KIF22	3835	HsCD00042788	100003401	DQ890771	CLOSED	BC028155
LDB1	8861	HsCD00039619	100008393	DQ893933	FUSION	BC000482.1
LDB1	8861	HsCD00042789	100003402	DQ890772	CLOSED	BC000482.1
SERPINB9	5272	HsCD00039620	100008394	DQ893934	FUSION	BC002538.1
SERPINB9	5272	HsCD00042791	100003404	DQ890774	CLOSED	BC002538.1
CCNF	899	HsCD00042792	100003405	DQ890775	CLOSED	BC012349.1
CD55	1604	HsCD00039621	100008395	DQ893935	FUSION	BC001288.1
CD55	1604	HsCD00042793	100003406	DQ890776	CLOSED	BC001288.1
CDH18	1016	HsCD00039622	100008396	DQ893936	FUSION	BC031051.1
CDH18	1016	HsCD00045568	100006181	DQ893551	CLOSED	BC031051.1
CHI3L1	1116	HsCD00039623	100008397	DQ893937	FUSION	BC008568.1
CHI3L1	1116	HsCD00042794	100003407	DQ890777	CLOSED	BC008568.1
ACTN1	87	HsCD00042795	100003408	DQ890778	CLOSED	BC015766
B2M	567	HsCD00039397	100008171	DQ893711	FUSION	BC032589.1
B2M	567	HsCD00042568	100003181	DQ890551	CLOSED	BC032589.1
BIRC4	331	HsCD00039698	100008472	DQ894012	FUSION	BC032729.1
ID2	3398	HsCD00042875	100003488	DQ890858	CLOSED	BC030639.1
GLRB	2743	HsCD00039700	100008474	DQ894014	FUSION	BC032635.1
GLRB	2743	HsCD00042876	100003489	DQ890859	CLOSED	BC032635.1
TRAPPC1	58485	HsCD00039701	100008475	DQ894015	FUSION	BC032717.1
TRAPPC1	58485	HsCD00042877	100003490	DQ890860	CLOSED	BC032717.1
CYP2J2	1573	HsCD00039703	100008477	DQ894017	FUSION	BC032594.1
CYP2J2	1573	HsCD00042879	100003492	DQ890862	CLOSED	BC032594.1
GPX7	2882	HsCD00039704	100008478	DQ894018	FUSION	BC032788.1
GPX7	2882	HsCD00042880	100003493	DQ890863	CLOSED	BC032788.1
SNRPB2	6629	HsCD00039705	100008479	DQ894019	FUSION	BC036737.2
SNRPB2	6629	HsCD00042881	100003494	DQ890864	CLOSED	BC036737.2
GLIPR1L1	256710	HsCD00039706	100008480	DQ894020	FUSION	BC014603.1
PENK	5179	HsCD00042882	100003495	DQ890865	CLOSED	NM_006211
GLIPR1L1	256710	HsCD00075924	100006349	EU176187	CLOSED	BC014603.1
KPNA4	3840	HsCD00039707	100008481	DQ894021	FUSION	BC034493.1
KPNA4	3840	HsCD00042883	100003496	DQ890866	CLOSED	BC034493.1
FNDC4	64838	HsCD00039708	100008482	DQ894022	FUSION	BC032725.1
GMCL1L	64396	HsCD00042884	100003497	DQ890867	CLOSED	BC024184.1
SUSD3	203328	HsCD00039710	100008484	DQ894024	FUSION	BC014601.1
SUSD3	203328	HsCD00076438	100006587	EU176188	CLOSED	BC014601.1
GMCL1L	64396	HsCD00039711	100008485	DQ894025	FUSION	BC024184
NOP5/NOP58	51602	HsCD00075926	100011348	EU176490	FUSION	BC032592.2
NOP5/NOP58	51602	HsCD00042885	100003498	DQ890868	CLOSED	BC032592.2
POU2AF1	5450	HsCD00076420	100011616	EU176491	FUSION	BC032549.1
POU2AF1	5450	HsCD00042886	100003499	DQ890869	CLOSED	BC032549.1
ELF2	1998	HsCD00039712	100008486	DQ894026	FUSION	BC034951.1
ACRBP	84519	HsCD00039714	100008488	DQ894028	FUSION	BC033010.1
ACRBP	84519	HsCD00042889	100003502	DQ890872	CLOSED	BC033010.1
TNFSF10	8743	HsCD00039715	100008489	DQ894029	FUSION	BC032722.1
TNFSF10	8743	HsCD00042890	100003503	DQ890873	CLOSED	BC032722.1
PIP5K1B	8395	HsCD00039716	100008490	DQ894030	FUSION	BC030587.1
PIP5K1B	8395	HsCD00042891	100003504	DQ890874	CLOSED	BC030587.1
OTX2	5015	HsCD00076424	100011617	EU176492	FUSION	BC032579.1
OTX2	5015	HsCD00042892	100003505	DQ890875	CLOSED	BC032579.1
ZBTB44	29068	HsCD00039717	100008491	DQ894031	FUSION	BC030580.1
ZBTB44	29068	HsCD00042893	100003506	DQ890876	CLOSED	BC030580.1
DTWD1	56986	HsCD00075927	100011349	EU176493	FUSION	BC032535.2
DTWD1	56986	HsCD00042894	100003507	DQ890877	CLOSED	BC032535.2
CYBB	1536	HsCD00039718	100008492	DQ894032	FUSION	BC032720.1
STK11IP	114790	HsCD00042937	100003550	DQ890920	CLOSED	BC034051.1
CEACAM5	1048	HsCD00042439	100011213	DQ896753	FUSION	BC034671.1
CEACAM5	1048	HsCD00042857	100003470	DQ890840	CLOSED	BC034671.1
UBE2C	11065	HsCD00044479	100005046	DQ892416	CLOSED	BC016292.1
FGFRL1	53834	HsCD00041381	100010091	DQ895631	FUSION	BC036769.1
RRAS	6237	HsCD00041392	100010102	DQ895642	FUSION	BC016286.1
RRAS	6237	HsCD00044491	100005058	DQ892428	CLOSED	BC016286.1
CCL22	6367	HsCD00042939	100003552	DQ890922	CLOSED	BC027952.1
CSTB	1476	HsCD00039759	100008533	DQ894073	FUSION	BC003370.1
CSTB	1476	HsCD00042940	100003553	DQ890923	CLOSED	BC003370.1
MYST2	11143	HsCD00039723	100008497	DQ894037	FUSION	BC032640.2
MYST2	11143	HsCD00042900	100003513	DQ890883	CLOSED	BC032640.2
SGCE	8910	HsCD00039749	100008523	DQ894063	FUSION	BC021709.1
SGCE	8910	HsCD00076421	100006577	EU176189	CLOSED	BC021709.1
KRTCAP2	200185	HsCD00042810	100003423	DQ890793	CLOSED	BC029806.1
RGS7	6000	HsCD00039635	100008409	DQ893949	FUSION	BC022009.1
RORC	6097	HsCD00042822	100003435	DQ890805	CLOSED	BC031554.1
PNKP	11284	HsCD00039647	100008421	DQ893961	FUSION	BC033822.1
PNKP	11284	HsCD00042823	100003436	DQ890806	CLOSED	BC033822.1
GEM	2669	HsCD00042838	100003451	DQ890821	CLOSED	BC022010.1
TDRKH	11022	HsCD00042438	100011212	DQ896752	FUSION	BC032690.1
IFT88	8100	HsCD00075922	100011347	EU176494	FUSION	BC030776.1
IFT88	8100	HsCD00075923	100006348	EU176190	CLOSED	BC030776.1
CD247	919	HsCD00039464	100008238	DQ893778	FUSION	BC025703.1
CD247	919	HsCD00076476	100006607	EU176191	CLOSED	BC025703.1
CYBB	1536	HsCD00042895	100003508	DQ890878	CLOSED	BC032720.1
PLSCR1	5359	HsCD00039719	100008493	DQ894033	FUSION	BC032718.1
PLSCR1	5359	HsCD00042896	100003509	DQ890879	CLOSED	BC032718.1
SLC40A1	30061	HsCD00039720	100008494	DQ894034	FUSION	BC037733.1
SLC40A1	30061	HsCD00042897	100003510	DQ890880	CLOSED	BC037733.1
GPR55	9290	HsCD00039721	100008495	DQ894035	FUSION	BC032694.1
GPR55	9290	HsCD00042898	100003511	DQ890881	CLOSED	BC032694.1
DHDH	27294	HsCD00039722	100008496	DQ894036	FUSION	BC032730.1
DHDH	27294	HsCD00042899	100003512	DQ890882	CLOSED	BC032730.1
HOXA1	3198	HsCD00039724	100008498	DQ894038	FUSION	BC032547.2
HOXA1	3198	HsCD00042901	100003514	DQ890884	CLOSED	BC032547.2
SLC7A3	84889	HsCD00039725	100008499	DQ894039	FUSION	BC033816.1
SLC7A3	84889	HsCD00042902	100003515	DQ890885	CLOSED	BC033816.1
HLA-G	3135	HsCD00042495	100011269	DQ896809	FUSION	BC021708.1
HLA-G	3135	HsCD00076442	100006591	EU176192	CLOSED	BC021708.1
SLC13A4	26266	HsCD00039726	100008500	DQ894040	FUSION	BC030689.1
SLC13A4	26266	HsCD00045575	100006188	DQ893558	CLOSED	BC030689.1
KHDRBS3	10656	HsCD00039727	100008501	DQ894041	FUSION	BC032606.2
KHDRBS3	10656	HsCD00042903	100003516	DQ890886	CLOSED	BC032606.2
SLCO6A1	133482	HsCD00039728	100008502	DQ894042	FUSION	BC034976.1
SLCO6A1	133482	HsCD00045576	100006189	DQ893559	CLOSED	BC034976.1
TRUB1	142940	HsCD00039729	100008503	DQ894043	FUSION	BC030601.1
TRUB1	142940	HsCD00042904	100003517	DQ890887	CLOSED	BC030601.1
BBS7	55212	HsCD00042496	100011270	DQ896810	FUSION	BC032691.1
BBS7	55212	HsCD00042905	100003518	DQ890888	CLOSED	BC032691.1
TAF7	6879	HsCD00039730	100008504	DQ894044	FUSION	BC032737.1
TAF7	6879	HsCD00042906	100003519	DQ890889	CLOSED	BC032737.1
PRKCH	5583	HsCD00039731	100008505	DQ894045	FUSION	BC037268.1
PRKCH	5583	HsCD00042907	100003520	DQ890890	CLOSED	BC037268.1
KERA	11081	HsCD00039732	100008506	DQ894046	FUSION	BC032667.2
KERA	11081	HsCD00042908	100003521	DQ890891	CLOSED	BC032667.2
FBLN1	2192	HsCD00039733	100008507	DQ894047	FUSION	BC022497.1
DCLK2	166614	HsCD00042909	100003522	DQ890892	CLOSED	BC032726.1
POLI	11201	HsCD00042497	100011271	DQ896811	FUSION	BC032662.1
POLI	11201	HsCD00042910	100003523	DQ890893	CLOSED	BC032662.1
B3GALT4	8705	HsCD00075928	100011350	EU176495	FUSION	BC032574.1
B3GALT4	8705	HsCD00076445	100006593	EU176193	CLOSED	BC032574.1
PAK7	57144	HsCD00039734	100008508	DQ894048	FUSION	BC024179.1
PAK7	57144	HsCD00042911	100003524	DQ890894	CLOSED	BC024179.1
THEG	51298	HsCD00039735	100008509	DQ894049	FUSION	BC028574.1
THEG	51298	HsCD00042912	100003525	DQ890895	CLOSED	BC028574.1
EEF2K	29904	HsCD00039736	100008510	DQ894050	FUSION	BC032665.1
EEF2K	29904	HsCD00042913	100003526	DQ890896	CLOSED	BC032665.1
PHF7	51533	HsCD00039737	100008511	DQ894051	FUSION	BC022002.1
PHF7	51533	HsCD00042914	100003527	DQ890897	CLOSED	BC022002.1
KLHL1	57626	HsCD00039738	100008512	DQ894052	FUSION	BC022460.1
KLHL1	57626	HsCD00042915	100003528	DQ890898	CLOSED	BC022460.1
LASS3	204219	HsCD00075929	100011351	EU176496	FUSION	BC034970.1
LASS3	204219	HsCD00042916	100003529	DQ890899	CLOSED	BC034970.1
OXR1	55074	HsCD00039739	100008513	DQ894053	FUSION	BC032710.2
OXR1	55074	HsCD00042917	100003530	DQ890900	CLOSED	BC032710.2
CD46	4179	HsCD00039740	100008514	DQ894054	FUSION	BC030594.1
CD46	4179	HsCD00042918	100003531	DQ890901	CLOSED	BC030594.1
SEC23A	10484	HsCD00039741	100008515	DQ894055	FUSION	BC036649.1
SEC23A	10484	HsCD00042919	100003532	DQ890902	CLOSED	BC036649.1
CALR3	125972	HsCD00039742	100008516	DQ894056	FUSION	BC014595.1
CALR3	125972	HsCD00042920	100003533	DQ890903	CLOSED	BC014595.1
TLK1	9874	HsCD00039743	100008517	DQ894057	FUSION	BC032657.1
TLK1	9874	HsCD00042921	100003534	DQ890904	CLOSED	BC032657.1
TSP50	29122	HsCD00076433	100011622	EU176497	FUSION	BC033016.1
ANKRD5	63926	HsCD00039744	100008518	DQ894058	FUSION	BC022878.1
ANKRD5	63926	HsCD00042922	100003535	DQ890905	CLOSED	BC022878.1
P2RX4	5025	HsCD00039745	100008519	DQ894059	FUSION	BC033826.1
P2RX4	5025	HsCD00042923	100003536	DQ890906	CLOSED	BC033826.1
TROAP	10024	HsCD00075930	100011352	EU176498	FUSION	BC032583.1
TROAP	10024	HsCD00042924	100003537	DQ890907	CLOSED	BC032583.1
SS18L1	26039	HsCD00075931	100011353	EU176499	FUSION	BC034494.1
SS18L1	26039	HsCD00042925	100003538	DQ890908	CLOSED	BC034494.1
DHX40	79665	HsCD00039746	100008520	DQ894060	FUSION	BC024187.1
DHX40	79665	HsCD00042926	100003539	DQ890909	CLOSED	BC024187.1
TROAP	10024	HsCD00045577	100006190	DQ893560	CLOSED	BC032583.1
ADAM32	203102	HsCD00039747	100008521	DQ894061	FUSION	BC030698.1
ADAM32	203102	HsCD00042927	100003540	DQ890910	CLOSED	BC030698.1
KLF15	28999	HsCD00039748	100008522	DQ894062	FUSION	BC036733.1
KLF15	28999	HsCD00042928	100003541	DQ890911	CLOSED	BC036733.1
PIK3C3	5289	HsCD00039398	100008172	DQ893712	FUSION	BC033004.1
PIK3C3	5289	HsCD00042569	100003182	DQ890552	CLOSED	BC033004.1
MAPK9	5601	HsCD00039399	100008173	DQ893713	FUSION	BC032539.1
MAPK9	5601	HsCD00075932	100006351	EU176194	CLOSED	BC032539.1
LARS2	23395	HsCD00075933	100011354	EU176500	FUSION	BC025989.1
LARS2	23395	HsCD00042570	100003183	DQ890553	CLOSED	BC025989.1
STK24	8428	HsCD00042929	100003542	DQ890912	CLOSED	BC035578.1
NEDD4L	23327	HsCD00042930	100003543	DQ890913	CLOSED	BC032597.1
MAP3K14	9020	HsCD00039750	100008524	DQ894064	FUSION	BC035576.1
SPOCK1	6695	HsCD00039751	100008525	DQ894065	FUSION	BC030691.1
SPOCK1	6695	HsCD00042931	100003544	DQ890914	CLOSED	BC030691.1
VDP	8615	HsCD00039752	100008526	DQ894066	FUSION	BC032654.1
VDP	8615	HsCD00075934	100006352	EU176195	CLOSED	BC032654.1
GABRA1	2554	HsCD00042932	100003545	DQ890915	CLOSED	BC030696.1
SPAG6	9576	HsCD00039753	100008527	DQ894067	FUSION	BC030585.1
SPAG6	9576	HsCD00042933	100003546	DQ890916	CLOSED	BC030585.1
CYP20A1	57404	HsCD00039754	100008528	DQ894068	FUSION	BC033752.1
STARD8	9754	HsCD00042934	100003547	DQ890917	CLOSED	BC035587.1
CYP20A1	57404	HsCD00039755	100008529	DQ894069	FUSION	BC033752.1
CYP20A1	57404	HsCD00042935	100003548	DQ890918	CLOSED	BC033752.1
CLUL1	27098	HsCD00039756	100008530	DQ894070	FUSION	BC025381.1
CLUL1	27098	HsCD00042936	100003549	DQ890919	CLOSED	BC025381.1
STK11IP	114790	HsCD00039757	100008531	DQ894071	FUSION	BC034051.1
PEX1	5189	HsCD00042938	100003551	DQ890921	CLOSED	BC035575.1
TEKT1	83659	HsCD00039624	100008398	DQ893938	FUSION	BC014599.1
TEKT1	83659	HsCD00042796	100003409	DQ890779	CLOSED	BC014599.1
C16orf61	56942	HsCD00039625	100008399	DQ893939	FUSION	BC032631.1
C16orf61	56942	HsCD00042797	100003410	DQ890780	CLOSED	BC032631.1
CKMT2	1160	HsCD00075914	100011342	EU176501	FUSION	BC029140.1
CKMT2	1160	HsCD00042798	100003411	DQ890781	CLOSED	BC029140.1
FCER1G	2207	HsCD00075915	100011343	EU176502	FUSION	BC033872.1
FCER1G	2207	HsCD00042799	100003412	DQ890782	CLOSED	BC033872.1
KRT20	54474	HsCD00042440	100011214	DQ896754	FUSION	BC031559.1
KRT20	54474	HsCD00042800	100003413	DQ890783	CLOSED	BC031559.1
SNN	8303	HsCD00039626	100008400	DQ893940	FUSION	BC036443.1
SNN	8303	HsCD00042801	100003414	DQ890784	CLOSED	BC036443.1
ACADL	33	HsCD00039627	100008401	DQ893941	FUSION	BC039063.1
ACADL	33	HsCD00042802	100003415	DQ890785	CLOSED	BC039063.1
DEXI	28955	HsCD00039628	100008402	DQ893942	FUSION	BC037569.1
DEXI	28955	HsCD00042803	100003416	DQ890786	CLOSED	BC037569.1
PAMCI	9182	HsCD00039629	100008403	DQ893943	FUSION	BC031589.1
PAMCI	9182	HsCD00042804	100003417	DQ890787	CLOSED	BC031589.1
SMCP	4184	HsCD00039630	100008404	DQ893944	FUSION	BC014593.1
SMCP	4184	HsCD00042805	100003418	DQ890788	CLOSED	BC014593.1
GALNTL5	168391	HsCD00039631	100008405	DQ893945	FUSION	BC022021.1
GALNTL5	168391	HsCD00042806	100003419	DQ890789	CLOSED	BC022021.1
CYTL1	54360	HsCD00039632	100008406	DQ893946	FUSION	BC031391.1
CYTL1	54360	HsCD00042807	100003420	DQ890790	CLOSED	BC031391.1
PROC	5624	HsCD00039633	100008407	DQ893947	FUSION	BC034377.1
PROC	5624	HsCD00042808	100003421	DQ890791	CLOSED	BC034377.1
CYTL1	54360	HsCD00042809	100003422	DQ890792	CLOSED	NM_018659
KRTCAP2	200185	HsCD00039634	100008408	DQ893948	FUSION	BC029806.1
RGS7	6000	HsCD00042811	100003424	DQ890794	CLOSED	BC022009.1
ZG16	123887	HsCD00039636	100008410	DQ893950	FUSION	BC029149.1
ZG16	123887	HsCD00042812	100003425	DQ890795	CLOSED	BC029149.1
SERPINF2	5345	HsCD00039637	100008411	DQ893951	FUSION	BC031592.1
SERPINF2	5345	HsCD00042813	100003426	DQ890796	CLOSED	BC031592.1
C9orf71	169693	HsCD00039638	100008412	DQ893952	FUSION	BC029780.1
C9orf71	169693	HsCD00042814	100003427	DQ890797	CLOSED	BC029780.1
SPAG8	26206	HsCD00075916	100011344	EU176503	FUSION	BC019247.1
SPAG8	26206	HsCD00042815	100003428	DQ890798	CLOSED	BC019247.1
PCNP	57092	HsCD00039639	100008413	DQ893953	FUSION	BC022001.1
PCNP	57092	HsCD00042816	100003429	DQ890799	CLOSED	BC022001.1
RGS7	6000	HsCD00039640	100008414	DQ893954	FUSION	BC022009.1
VSNL1	7447	HsCD00039641	100008415	DQ893955	FUSION	BC022012.1
VSNL1	7447	HsCD00042817	100003430	DQ890800	CLOSED	BC022012.1
PCYOX1	51449	HsCD00039642	100008416	DQ893956	FUSION	BC033815.1
PCYOX1	51449	HsCD00042818	100003431	DQ890801	CLOSED	BC033815.1
SENP8	123228	HsCD00039643	100008417	DQ893957	FUSION	BC031411.1
SENP8	123228	HsCD00042819	100003432	DQ890802	CLOSED	BC031411.1
NAP1L3	4675	HsCD00039644	100008418	DQ893958	FUSION	BC034954.1
NAP1L3	4675	HsCD00042820	100003433	DQ890803	CLOSED	BC034954.1
NMNAT3	349565	HsCD00039645	100008419	DQ893959	FUSION	BC034374.1
NMNAT3	349565	HsCD00042821	100003434	DQ890804	CLOSED	BC034374.1
RORC	6097	HsCD00039646	100008420	DQ893960	FUSION	BC031554.1
RTP1	132112	HsCD00039648	100008422	DQ893962	FUSION	BC034744.1
RTP1	132112	HsCD00042824	100003437	DQ890807	CLOSED	BC034744.1
PCTK2	5128	HsCD00039649	100008423	DQ893963	FUSION	BC033005.1
PCTK2	5128	HsCD00042825	100003438	DQ890808	CLOSED	BC033005.1
EVI2A	2123	HsCD00039650	100008424	DQ893964	FUSION	BC035572.1
EVI2A	2123	HsCD00042826	100003439	DQ890809	CLOSED	BC035572.1
CYP4F12	66002	HsCD00039651	100008425	DQ893965	FUSION	BC035350.1
CYP4F12	66002	HsCD00042827	100003440	DQ890810	CLOSED	BC035350.1
BDNF	627	HsCD00039652	100008426	DQ893966	FUSION	BC029795.1
BDNF	627	HsCD00042828	100003441	DQ890811	CLOSED	BC029795.1
TKTL1	8277	HsCD00039653	100008427	DQ893967	FUSION	BC025382.1
TKTL1	8277	HsCD00042829	100003442	DQ890812	CLOSED	BC025382.1
STC1	6781	HsCD00039654	100008428	DQ893968	FUSION	BC029044.1
STC1	6781	HsCD00042830	100003443	DQ890813	CLOSED	BC029044.1
MTMR9	66036	HsCD00039655	100008429	DQ893969	FUSION	BC022003.1
MTMR9	66036	HsCD00075917	100006345	EU176196	CLOSED	BC022003.1
TRIM74	378108	HsCD00039656	100008430	DQ893970	FUSION	BC033871.1
TRIM74	378108	HsCD00042831	100003444	DQ890814	CLOSED	BC033871.1
SLC22A11	55867	HsCD00075918	100011345	EU176504	FUSION	BC034384.1
SLC22A11	55867	HsCD00075919	100006346	EU176197	CLOSED	BC034384.1
MIF4GD	57409	HsCD00039657	100008431	DQ893971	FUSION	BC033759.1
MIF4GD	57409	HsCD00042832	100003445	DQ890815	CLOSED	BC033759.1
SLC22A4	6583	HsCD00039658	100008432	DQ893972	FUSION	BC028313.1
SLC22A4	6583	HsCD00042833	100003446	DQ890816	CLOSED	BC028313.1
ATP4B	496	HsCD00039659	100008433	DQ893973	FUSION	BC029059.1
ATP4B	496	HsCD00042834	100003447	DQ890817	CLOSED	BC029059.1
RCBTB2	1102	HsCD00042493	100011267	DQ896807	FUSION	BC029052.1
RCBTB2	1102	HsCD00042835	100003448	DQ890818	CLOSED	BC029052.1
GNMT	27232	HsCD00039660	100008434	DQ893974	FUSION	BC032627.1
GNMT	27232	HsCD00042836	100003449	DQ890819	CLOSED	BC032627.1
HABP2	3026	HsCD00039661	100008435	DQ893975	FUSION	BC031412.1
HABP2	3026	HsCD00042837	100003450	DQ890820	CLOSED	BC031412.1
GEM	2669	HsCD00039662	100008436	DQ893976	FUSION	BC022010.1
TDRKH	11022	HsCD00042839	100003452	DQ890822	CLOSED	BC032690.1
SURF1	6834	HsCD00039663	100008437	DQ893977	FUSION	BC028314.1
SURF1	6834	HsCD00042840	100003453	DQ890823	CLOSED	BC028314.1
ENTPD4	9583	HsCD00039664	100008438	DQ893978	FUSION	BC034477.1
ENTPD4	9583	HsCD00042841	100003454	DQ890824	CLOSED	BC034477.1
CGREF1	10669	HsCD00039665	100008439	DQ893979	FUSION	BC034764.1
CGREF1	10669	HsCD00042842	100003455	DQ890825	CLOSED	BC034764.1
CCIN	881	HsCD00039666	100008440	DQ893980	FUSION	BC019251.1
CCIN	881	HsCD00042843	100003456	DQ890826	CLOSED	BC019251.1
GNPTG	84572	HsCD00039667	100008441	DQ893981	FUSION	BC014592.1
GNPTG	84572	HsCD00042844	100003457	DQ890827	CLOSED	BC014592.1
CCIN	881	HsCD00039668	100008442	DQ893982	FUSION	BC019251
MGC34821	283238	HsCD00039669	100008443	DQ893983	FUSION	BC034394.1
MGC34821	283238	HsCD00042845	100003458	DQ890828	CLOSED	BC034394.1
LNX1	84708	HsCD00039670	100008444	DQ893984	FUSION	BC034737.1
CCDC54	84692	HsCD00039671	100008445	DQ893985	FUSION	BC030780.1
CCDC54	84692	HsCD00042846	100003459	DQ890829	CLOSED	BC030780.1
CCDC54	84692	HsCD00042847	100003460	DQ890830	CLOSED	BC030780
RFX4	5992	HsCD00039672	100008446	DQ893986	FUSION	BC030644.1
RFX4	5992	HsCD00042848	100003461	DQ890831	CLOSED	BC030644.1
GPR3	2827	HsCD00039673	100008447	DQ893987	FUSION	BC032702.1
GPR3	2827	HsCD00042849	100003462	DQ890832	CLOSED	BC032702.1
ACSBG2	81616	HsCD00039674	100008448	DQ893988	FUSION	BC022027.1
ACSBG2	81616	HsCD00042850	100003463	DQ890833	CLOSED	BC022027.1
GPR65	8477	HsCD00039675	100008449	DQ893989	FUSION	BC035633.1
GPR65	8477	HsCD00042851	100003464	DQ890834	CLOSED	BC035633.1
ACSL4	2182	HsCD00039676	100008450	DQ893990	FUSION	BC034959.1
ACSL4	2182	HsCD00042852	100003465	DQ890835	CLOSED	BC034959.1
CCNG2	901	HsCD00039677	100008451	DQ893991	FUSION	BC032518.1
CCNG2	901	HsCD00042853	100003466	DQ890836	CLOSED	BC032518.1
TOB1	10140	HsCD00039678	100008452	DQ893992	FUSION	NM_005749
TOB1	10140	HsCD00039679	100008453	DQ893993	FUSION	BC031406.1
TOB1	10140	HsCD00042854	100003467	DQ890837	CLOSED	BC031406.1
KBTBD7	84078	HsCD00039680	100008454	DQ893994	FUSION	BC022033.1
KBTBD7	84078	HsCD00042855	100003468	DQ890838	CLOSED	BC022033.1
DAO	1610	HsCD00039681	100008455	DQ893995	FUSION	BC029057.1
DAO	1610	HsCD00042856	100003469	DQ890839	CLOSED	BC029057.1
THEX1	90459	HsCD00039682	100008456	DQ893996	FUSION	BC035279.1
THEX1	90459	HsCD00042858	100003471	DQ890841	CLOSED	BC035279.1
FCGR1A	2209	HsCD00039683	100008457	DQ893997	FUSION	BC032634.1
FCGR1A	2209	HsCD00042859	100003472	DQ890842	CLOSED	BC032634.1
NGEF	25791	HsCD00039684	100008458	DQ893998	FUSION	BC031573.1
NGEF	25791	HsCD00042860	100003473	DQ890843	CLOSED	BC031573.1
AGTRL1	187	HsCD00075920	100011346	EU176506	FUSION	BC032688.1
AGTRL1	187	HsCD00042861	100003474	DQ890844	CLOSED	BC032688.1
USP44	84101	HsCD00039685	100008459	DQ893999	FUSION	BC030704.1
USP44	84101	HsCD00042862	100003475	DQ890845	CLOSED	BC030704.1
FAM46D	169966	HsCD00039686	100008460	DQ894000	FUSION	BC034979.1
FAM46D	169966	HsCD00042863	100003476	DQ890846	CLOSED	BC034979.1
SEMA3C	10512	HsCD00039687	100008461	DQ894001	FUSION	BC030690.1
SEMA3C	10512	HsCD00042864	100003477	DQ890847	CLOSED	BC030690.1
CADM3	57863	HsCD00039688	100008462	DQ894002	FUSION	BC033819.1
CADM3	57863	HsCD00042865	100003478	DQ890848	CLOSED	BC033819.1
SENP5	205564	HsCD00039689	100008463	DQ894003	FUSION	BC030705.1
SENP5	205564	HsCD00042866	100003479	DQ890849	CLOSED	BC030705.1
GFRA3	2676	HsCD00039690	100008464	DQ894004	FUSION	BC037951.1
GFRA3	2676	HsCD00042867	100003480	DQ890850	CLOSED	BC037951.1
TLR2	7097	HsCD00039691	100008465	DQ894005	FUSION	BC033756.1
TLR2	7097	HsCD00075921	100006347	EU176198	CLOSED	BC033756.1
GPRC5B	51704	HsCD00039692	100008466	DQ894006	FUSION	BC034467.1
GPRC5B	51704	HsCD00042868	100003481	DQ890851	CLOSED	BC034467.1
ANAPC2	29882	HsCD00039693	100008467	DQ894007	FUSION	BC032503.1
ANAPC2	29882	HsCD00042869	100003482	DQ890852	CLOSED	BC032503.1
ADMR	11318	HsCD00042492	100011266	DQ896806	FUSION	BC034761.1
ADMR	11318	HsCD00042870	100003483	DQ890853	CLOSED	BC034761.1
FAM55A	120400	HsCD00039694	100008468	DQ894008	FUSION	BC029049.1
FAM55A	120400	HsCD00042871	100003484	DQ890854	CLOSED	BC029049.1
HMGCR	3156	HsCD00039695	100008469	DQ894009	FUSION	BC033692.1
HMGCR	3156	HsCD00042872	100003485	DQ890855	CLOSED	BC033692.1
GAPDHS	26330	HsCD00039696	100008470	DQ894010	FUSION	BC036373.1
GAPDHS	26330	HsCD00042873	100003486	DQ890856	CLOSED	BC036373.1
RAPGEF4	11069	HsCD00039697	100008471	DQ894011	FUSION	BC024004.1
RAPGEF4	11069	HsCD00042566	100003179	DQ890549	CLOSED	BC024004.1
DOK2	9046	HsCD00042494	100011268	DQ896808	FUSION	BC032623.1
DOK2	9046	HsCD00042567	100003180	DQ890550	CLOSED	BC032623.1
LSM6	11157	HsCD00076169	100011486	EU176507	FUSION	BC016026.1
LSM6	11157	HsCD00044391	100004958	DQ892328	CLOSED	BC016026.1
EDNRA	1909	HsCD00041282	100009992	DQ895532	FUSION	BC022511.1
EDNRA	1909	HsCD00044392	100004959	DQ892329	CLOSED	BC022511.1
SPINK2	6691	HsCD00041283	100009993	DQ895533	FUSION	BC022514.1
SPINK2	6691	HsCD00076493	100006615	EU176199	CLOSED	BC022514.1
ISLR	3671	HsCD00076356	100006559	EU176200	CLOSED	BC022478.1
ISLR	3671	HsCD00076170	100011487	EU176508	FUSION	BC022478.1
ISLR	3671	HsCD00076422	100006578	EU176201	CLOSED	BC022478.1
SPANXB1	728695	HsCD00041284	100009994	DQ895534	FUSION	BC034472.1
SPANXB1	728695	HsCD00044393	100004960	DQ892330	CLOSED	BC034472.1
OMG	4974	HsCD00041285	100009995	DQ895535	FUSION	BC018050.1
OMG	4974	HsCD00044394	100004961	DQ892331	CLOSED	BC018050.1
MAP1LC3A	84557	HsCD00041286	100009996	DQ895536	FUSION	BC015810.1
MAP1LC3A	84557	HsCD00045658	100006271	DQ893641	CLOSED	BC015810.1
LILRB4	11006	HsCD00041044	100009742	DQ895282	FUSION	BC026309.1
LILRB4	11006	HsCD00044162	100004719	DQ892089	CLOSED	BC026309.1
TAC1	6863	HsCD00041045	100009743	DQ895283	FUSION	BC018047.1
TAC1	6863	HsCD00044163	100004720	DQ892090	CLOSED	BC018047.1
ENPP4	22875	HsCD00041287	100009997	DQ895537	FUSION	BC018054.1
ENPP4	22875	HsCD00044395	100004962	DQ892332	CLOSED	BC018054.1
LMO2	4005	HsCD00041288	100009998	DQ895538	FUSION	BC034041.1
LMO2	4005	HsCD00044396	100004963	DQ892333	CLOSED	BC034041.1
ID3	3399	HsCD00041289	100009999	DQ895539	FUSION	BC003107.1
OLFM3	118427	HsCD00076171	100011488	EU176509	FUSION	BC022531.1
SNCG	6623	HsCD00044397	100004964	DQ892334	CLOSED	BC014098.2
PMCH	5367	HsCD00041290	100010000	DQ895540	FUSION	BC018048.1
PMCH	5367	HsCD00044398	100004965	DQ892335	CLOSED	BC018048.1
SEPT4	5414	HsCD00041291	100010001	DQ895541	FUSION	BC018056.1
SLBP	7884	HsCD00044433	100005000	DQ892370	CLOSED	BC015703.1
LGI1	9211	HsCD00041330	100010040	DQ895580	FUSION	BC022500.1
LRRC59	55379	HsCD00044438	100005005	DQ892375	CLOSED	BC017168.1
GAD1	2571	HsCD00041340	100010050	DQ895590	FUSION	BC026349.1
CLEC1A	51267	HsCD00041401	100010111	DQ895651	FUSION	BC039072.1
CLEC1A	51267	HsCD00044503	100005070	DQ892440	CLOSED	BC039072.1
ARF4	378	HsCD00076452	100006597	EU176202	CLOSED	BC003364.1
HYAL1	3373	HsCD00039769	100008543	DQ894083	FUSION	BC035695.1
GZMK	3003	HsCD00039779	100008553	DQ894093	FUSION	BC035802.1
GZMK	3003	HsCD00076463	100006601	EU176203	CLOSED	BC035802.1
AOAH	313	HsCD00042957	100003570	DQ890940	CLOSED	BC025698.1
GPR171	29909	HsCD00039787	100008561	DQ894101	FUSION	BC036815.1
TEKT2	27285	HsCD00044131	100004688	DQ892058	CLOSED	BC035620.1
TSPAN13	27075	HsCD00041014	100009712	DQ895252	FUSION	BC033863.1
TSPAN13	27075	HsCD00044132	100004689	DQ892059	CLOSED	BC033863.1
SEPT4	5414	HsCD00044399	100004966	DQ892336	CLOSED	BC018056.1
MFAP2	4237	HsCD00041292	100010002	DQ895542	FUSION	BC015039.1
MFAP2	4237	HsCD00076426	100006581	EU176204	CLOSED	BC015039.1
C16orf33	79622	HsCD00044400	100004967	DQ892337	CLOSED	BC009179
HEBP1	50865	HsCD00041293	100010003	DQ895543	FUSION	BC016277.1
HEBP1	50865	HsCD00044401	100004968	DQ892338	CLOSED	BC016277.1
DCTN4	51164	HsCD00041294	100010004	DQ895544	FUSION	BC026323.1
DCTN4	51164	HsCD00044402	100004969	DQ892339	CLOSED	BC026323.1
HPCAL4	51440	HsCD00041295	100010005	DQ895545	FUSION	BC030827.1
HPCAL4	51440	HsCD00044403	100004970	DQ892340	CLOSED	BC030827.1
MOCS3	27304	HsCD00041296	100010006	DQ895546	FUSION	BC015939.1
MOCS3	27304	HsCD00044418	100004985	DQ892355	CLOSED	BC015939.1
CD83	9308	HsCD00041313	100010023	DQ895563	FUSION	BC030830.1
CD83	9308	HsCD00044419	100004986	DQ892356	CLOSED	BC030830.1
GABRB1	2560	HsCD00041314	100010024	DQ895564	FUSION	BC022449.1
GABRB1	2560	HsCD00044420	100004987	DQ892357	CLOSED	BC022449.1
RAN	5901	HsCD00041315	100010025	DQ895565	FUSION	BC014901.1
RAN	5901	HsCD00044421	100004988	DQ892358	CLOSED	BC014901.1
CORO2B	10391	HsCD00041316	100010026	DQ895566	FUSION	BC026335.1
CORO2B	10391	HsCD00044422	100004989	DQ892359	CLOSED	BC026335.1
ZCRB1	85437	HsCD00041046	100009744	DQ895284	FUSION	BC022543.1
ZCRB1	85437	HsCD00044164	100004721	DQ892091	CLOSED	BC022543.1
ATE1	11101	HsCD00041047	100009745	DQ895285	FUSION	BC022026.1
ATE1	11101	HsCD00044165	100004722	DQ892092	CLOSED	BC022026.1
RABL2B	11158	HsCD00041317	100010027	DQ895567	FUSION	BC014879.1
RABL2B	11158	HsCD00044423	100004990	DQ892360	CLOSED	BC014879.1
PPP2R5A	5525	HsCD00041318	100010028	DQ895568	FUSION	BC022474.1
PPP2R5A	5525	HsCD00044424	100004991	DQ892361	CLOSED	BC022474.1
MMD	23531	HsCD00041319	100010029	DQ895569	FUSION	BC026324.1
MMD	23531	HsCD00044425	100004992	DQ892362	CLOSED	BC026324.1
ACVR1C	130399	HsCD00041320	100010030	DQ895570	FUSION	BC022530.1
ACVR1C	130399	HsCD00076172	100006456	EU176205	CLOSED	BC022530.1
TSPAN7	7102	HsCD00041321	100010031	DQ895571	FUSION	BC018036.1
TSPAN7	7102	HsCD00044166	100004723	DQ892093	CLOSED	BC018036.1
SLC16A1	6566	HsCD00041048	100009746	DQ895286	FUSION	BC026317.1
CORO2B	10391	HsCD00044167	100004724	DQ892094	CLOSED	BC026335.1
SLC16A1	6566	HsCD00076173	100006457	EU176206	CLOSED	BC026317.1
KCTD4	386618	HsCD00041049	100009747	DQ895287	FUSION	BC018063.1
KCTD4	386618	HsCD00076174	100006458	EU176207	CLOSED	BC018063.1
KCNJ3	3760	HsCD00041322	100010032	DQ895572	FUSION	BC022495.1
KCNJ3	3760	HsCD00044426	100004993	DQ892363	CLOSED	BC022495.1
TTC33	23548	HsCD00041323	100010033	DQ895573	FUSION	BC015701.1
TTC33	23548	HsCD00044427	100004994	DQ892364	CLOSED	BC015701.1
CAMK2G	818	HsCD00041324	100010034	DQ895574	FUSION	BC034044.1
CAMK2G	818	HsCD00044428	100004995	DQ892365	CLOSED	BC034044.1
AQP1	358	HsCD00041325	100010035	DQ895575	FUSION	BC022486.1
AQP1	358	HsCD00044429	100004996	DQ892366	CLOSED	BC022486.1
SLC22A15	55356	HsCD00041326	100010036	DQ895576	FUSION	BC026358.1
SLC22A15	55356	HsCD00044430	100004997	DQ892367	CLOSED	BC026358.1
CD200	4345	HsCD00041327	100010037	DQ895577	FUSION	BC022522.1
CD200	4345	HsCD00044431	100004998	DQ892368	CLOSED	BC022522.1
PDE1A	5136	HsCD00041328	100010038	DQ895578	FUSION	BC022480.1
PDE1A	5136	HsCD00044432	100004999	DQ892369	CLOSED	BC022480.1
SLBP	7884	HsCD00041329	100010039	DQ895579	FUSION	BC015703.1
LGI1	9211	HsCD00044434	100005001	DQ892371	CLOSED	BC022500.1
GPM6A	2823	HsCD00041331	100010041	DQ895581	FUSION	BC022528.1
GPM6A	2823	HsCD00044435	100005002	DQ892372	CLOSED	BC022528.1
CPNE6	9362	HsCD00041332	100010042	DQ895582	FUSION	BC018046.1
CPNE6	9362	HsCD00045659	100006272	DQ893642	CLOSED	BC018046.1
SULT4A1	25830	HsCD00041333	100010043	DQ895583	FUSION	BC022459.1
SULT4A1	25830	HsCD00044436	100005003	DQ892373	CLOSED	BC022459.1
TRIM23	373	HsCD00041334	100010044	DQ895584	FUSION	BC022510.1
TRIM23	373	HsCD00045663	100006276	DQ893646	CLOSED	BC022510.1
FAM84A	151354	HsCD00042541	100011315	DQ896855	FUSION	BC026346.1
FAM84A	151354	HsCD00045664	100006277	DQ893647	CLOSED	BC026346.1
MOG	4340	HsCD00041335	100010045	DQ895585	FUSION	BC035938.1
MOG	4340	HsCD00076494	100011651	EU176510	FUSION	BC035938.1
MOG	4340	HsCD00041336	100010046	DQ895586	FUSION	BC035938.1
MOG	4340	HsCD00044437	100005004	DQ892374	CLOSED	BC035938.1
C1orf102	127700	HsCD00041337	100010047	DQ895587	FUSION	BC018069.1
C1orf102	127700	HsCD00076175	100006459	EU176208	CLOSED	BC018069.1
KLHL2	11275	HsCD00041338	100010048	DQ895588	FUSION	BC022503.1
KLHL2	11275	HsCD00045655	100006268	DQ893638	CLOSED	BC022503.1
LRRC59	55379	HsCD00041339	100010049	DQ895589	FUSION	BC017168.1
GAD1	2571	HsCD00044439	100005006	DQ892376	CLOSED	BC026349.1
CRYM	1428	HsCD00041341	100010051	DQ895591	FUSION	BC018061.1
CRYM	1428	HsCD00044440	100005007	DQ892377	CLOSED	BC018061.1
ADORA1	134	HsCD00044441	100005008	DQ892378	CLOSED	BC026340.1
KEAP1	9817	HsCD00076344	100006547	EU176209	CLOSED	NM_203500.1
ADORA1	134	HsCD00041342	100010052	DQ895592	FUSION	BC026340.1
ADORA1	134	HsCD00044442	100005009	DQ892379	CLOSED	BC026340.1
ME3	10873	HsCD00044443	100005010	DQ892380	CLOSED	BC022472.1
PRMT8	56341	HsCD00041343	100010053	DQ895593	FUSION	BC022458.1
PRMT8	56341	HsCD00044444	100005011	DQ892381	CLOSED	BC022458.1
RFX5	5993	HsCD00041344	100010054	DQ895594	FUSION	BC017471.1
RFX5	5993	HsCD00044445	100005012	DQ892382	CLOSED	BC017471.1
KCNK1	3775	HsCD00041345	100010055	DQ895595	FUSION	BC018051.1
KCNK1	3775	HsCD00044446	100005013	DQ892383	CLOSED	BC018051.1
BIRC2	329	HsCD00041346	100010056	DQ895596	FUSION	BC016174.1
BIRC2	329	HsCD00044447	100005014	DQ892384	CLOSED	BC016174.1
KEAP1	9817	HsCD00041347	100010057	DQ895597	FUSION	BC015945.1
KEAP1	9817	HsCD00045656	100006269	DQ893639	CLOSED	BC015945.1
GNAI1	2770	HsCD00041348	100010058	DQ895598	FUSION	BC026326.1
GNAI1	2770	HsCD00044448	100005015	DQ892385	CLOSED	BC026326.1
PDE1C	5137	HsCD00076176	100011489	EU176511	FUSION	BC022525.1
PDE1C	5137	HsCD00045660	100006273	DQ893643	CLOSED	BC022525.1
GNAZ	2781	HsCD00076177	100011490	EU176512	FUSION	BC026342.1
GNAZ	2781	HsCD00044449	100005016	DQ892386	CLOSED	BC026342.1
SH3KBP1	30011	HsCD00041350	100010060	DQ895600	FUSION	BC015806.1
SH3KBP1	30011	HsCD00044450	100005017	DQ892387	CLOSED	BC015806.1
AGTR1	185	HsCD00041351	100010061	DQ895601	FUSION	BC022447.1
AGTR1	185	HsCD00044451	100005018	DQ892388	CLOSED	BC022447.1
PROS1	5627	HsCD00041352	100010062	DQ895602	FUSION	BC015801.1
PROS1	5627	HsCD00044452	100005019	DQ892389	CLOSED	BC015801.1
TSSK1B	83942	HsCD00041353	100010063	DQ895603	FUSION	BC022515.1
TSSK1B	83942	HsCD00045665	100006278	DQ893648	CLOSED	BC022515.1
ZBED1	9189	HsCD00041354	100010064	DQ895604	FUSION	BC015030.1
ZBED1	9189	HsCD00045657	100006270	DQ893640	CLOSED	BC015030.1
SLCO1C1	53919	HsCD00076495	100006616	EU176210	CLOSED	BC022461.1
LRRN2	10446	HsCD00041355	100010065	DQ895605	FUSION	BC034047.1
LRRN2	10446	HsCD00044453	100005020	DQ892390	CLOSED	BC034047.1
ACTA2	59	HsCD00041356	100010066	DQ895606	FUSION	BC017554.1
ACTA2	59	HsCD00044454	100005021	DQ892391	CLOSED	BC017554.1
PECAM1	5175	HsCD00045661	100006274	DQ893644	CLOSED	BC022512.1
KCNJ10	3766	HsCD00041357	100010067	DQ895607	FUSION	BC034036.1
KCNJ10	3766	HsCD00044455	100005022	DQ892392	CLOSED	BC034036.1
DPP10	57628	HsCD00041358	100010068	DQ895608	FUSION	BC030832.1
DPP10	57628	HsCD00044456	100005023	DQ892393	CLOSED	BC030832.1
WIF1	11197	HsCD00041359	100010069	DQ895609	FUSION	BC018037.1
WIF1	11197	HsCD00044457	100005024	DQ892394	CLOSED	BC018037.1
USP16	10600	HsCD00041360	100010070	DQ895610	FUSION	BC030777.1
USP16	10600	HsCD00044458	100005025	DQ892395	CLOSED	BC030777.1
GJA1	2697	HsCD00041361	100010071	DQ895611	FUSION	BC026329.1
GJA1	2697	HsCD00045666	100006279	DQ893649	CLOSED	BC026329.1
GRM3	2913	HsCD00044459	100005026	DQ892396	CLOSED	BC022496.1
DPF2	5977	HsCD00041362	100010072	DQ895612	FUSION	BC014889.1
DPF2	5977	HsCD00044460	100005027	DQ892397	CLOSED	BC014889.1
LRDD	55367	HsCD00076178	100006460	EU176211	CLOSED	BC014904.1
DENND1B	163486	HsCD00041363	100010073	DQ895613	FUSION	BC022561.1
DENND1B	163486	HsCD00044461	100005028	DQ892398	CLOSED	BC022561.1
NTSR2	23620	HsCD00076446	100011625	EU176513	FUSION	BC022501.1
NTSR2	23620	HsCD00076440	100006589	EU176212	CLOSED	BC022501.1
PTPRN2	5799	HsCD00076448	100011626	EU176514	FUSION	BC034040.1
PTPRN2	5799	HsCD00044462	100005029	DQ892399	CLOSED	BC034040.1
IKZF5	64376	HsCD00041364	100010074	DQ895614	FUSION	BC022564.1
IKZF5	64376	HsCD00044463	100005030	DQ892400	CLOSED	BC022564.1
PPFIA1	8500	HsCD00044464	100005031	DQ892401	CLOSED	BC034046.1
HSFX1	51402	HsCD00076179	100011491	EU176515	FUSION	BC021706.1
HSFX1	51402	HsCD00045662	100006275	DQ893645	CLOSED	BC021706.1
RB1CC1	9821	HsCD00044465	100005032	DQ892402	CLOSED	BC017556.1
KRTAP3-2	83897	HsCD00044466	100005033	DQ892403	CLOSED	BC034582.1
MKRN1	23608	HsCD00076180	100011492	EU176516	FUSION	BC037400.1
MKRN1	23608	HsCD00044467	100005034	DQ892404	CLOSED	BC037400.1
C9orf80	58493	HsCD00041366	100010076	DQ895616	FUSION	BC014881.1
C9orf80	58493	HsCD00044468	100005035	DQ892405	CLOSED	BC014881.1
TMEM161B	153396	HsCD00041367	100010077	DQ895617	FUSION	BC037287.1
SAA1	6288	HsCD00076395	100011602	EU176517	FUSION	BC105796.1
TMEM161B	153396	HsCD00076181	100006461	EU176213	CLOSED	BC037287.1
H2AFV	94239	HsCD00041368	100010078	DQ895618	FUSION	BC014885.1
H2AFV	94239	HsCD00044469	100005036	DQ892406	CLOSED	BC014885.1
LMBR1L	55716	HsCD00041369	100010079	DQ895619	FUSION	BC015015.1
LMBR1L	55716	HsCD00044470	100005037	DQ892407	CLOSED	BC015015.1
CHRAC1	54108	HsCD00041370	100010080	DQ895620	FUSION	BC015891.1
CHRAC1	54108	HsCD00076496	100006617	EU176214	CLOSED	BC015891.1
GABRA3	2556	HsCD00041371	100010081	DQ895621	FUSION	BC028629.1
GABRA3	2556	HsCD00044471	100005038	DQ892408	CLOSED	BC028629.1
FAU	2197	HsCD00041372	100010082	DQ895622	FUSION	BC033877.1
FAU	2197	HsCD00044472	100005039	DQ892409	CLOSED	BC033877.1
ENTPD2	954	HsCD00041373	100010083	DQ895623	FUSION	BC035738.1
ENTPD2	954	HsCD00044473	100005040	DQ892410	CLOSED	BC035738.1
RP4-662A9.2	154089	HsCD00041374	100010084	DQ895624	FUSION	BC032958.1
RP4-662A9.2	154089	HsCD00076459	100006599	EU176215	CLOSED	BC032958.1
SLC19A3	80704	HsCD00041375	100010085	DQ895625	FUSION	BC032014.1
SLC19A3	80704	HsCD00044474	100005041	DQ892411	CLOSED	BC032014.1
C2orf40	84417	HsCD00041376	100010086	DQ895626	FUSION	BC021742.1
C2orf40	84417	HsCD00044475	100005042	DQ892412	CLOSED	BC021742.1
KCNV1	27012	HsCD00041377	100010087	DQ895627	FUSION	BC028739.1
KCNV1	27012	HsCD00044476	100005043	DQ892413	CLOSED	BC028739.1
HSPC047	29060	HsCD00041378	100010088	DQ895628	FUSION	BC035371.1
HSPC047	29060	HsCD00044477	100005044	DQ892414	CLOSED	BC035371.1
MYOC	4653	HsCD00041379	100010089	DQ895629	FUSION	BC029261.1
MYOC	4653	HsCD00044478	100005045	DQ892415	CLOSED	BC029261.1
UBE2C	11065	HsCD00041380	100010090	DQ895630	FUSION	BC016292.1
FGFRL1	53834	HsCD00044480	100005047	DQ892417	CLOSED	BC036769.1
FATE1	89885	HsCD00041382	100010092	DQ895632	FUSION	BC022064.1
FATE1	89885	HsCD00044481	100005048	DQ892418	CLOSED	BC022064.1
PIAS4	51588	HsCD00041383	100010093	DQ895633	FUSION	BC029874.1
PIAS4	51588	HsCD00044482	100005049	DQ892419	CLOSED	BC029874.1
SNX10	29887	HsCD00041384	100010094	DQ895634	FUSION	BC034992.1
SNX10	29887	HsCD00044483	100005050	DQ892420	CLOSED	BC034992.1
CAMKK1	84254	HsCD00041385	100010095	DQ895635	FUSION	BC031647.1
CAMKK1	84254	HsCD00044484	100005051	DQ892421	CLOSED	BC031647.1
U2AF1L4	199746	HsCD00041386	100010096	DQ895636	FUSION	BC021186.1
U2AF1L4	199746	HsCD00044485	100005052	DQ892422	CLOSED	BC021186.1
OCLN	4950	HsCD00041387	100010097	DQ895637	FUSION	BC029886.1
OCLN	4950	HsCD00044486	100005053	DQ892423	CLOSED	BC029886.1
LYSMD2	256586	HsCD00041388	100010098	DQ895638	FUSION	BC033515.1
LYSMD2	256586	HsCD00044487	100005054	DQ892424	CLOSED	BC033515.1
SLC1A1	6505	HsCD00041389	100010099	DQ895639	FUSION	BC033040.1
SLC1A1	6505	HsCD00044488	100005055	DQ892425	CLOSED	BC033040.1
SCN2B	6327	HsCD00041390	100010100	DQ895640	FUSION	BC036793.1
SCN2B	6327	HsCD00044489	100005056	DQ892426	CLOSED	BC036793.1
STAM2	10254	HsCD00041391	100010101	DQ895641	FUSION	BC028740.1
STAM2	10254	HsCD00044490	100005057	DQ892427	CLOSED	BC028740.1
FMO3	2328	HsCD00041393	100010103	DQ895643	FUSION	BC032016.1
FMO3	2328	HsCD00044492	100005059	DQ892429	CLOSED	BC032016.1
RAB27B	5874	HsCD00076182	100011493	EU176518	FUSION	BC027474.1
RAB27B	5874	HsCD00044493	100005060	DQ892430	CLOSED	BC027474.1
P4HA2	8974	HsCD00076183	100011494	EU176519	FUSION	BC035813.1
P4HA2	8974	HsCD00044494	100005061	DQ892431	CLOSED	BC035813.1
ATG10	83734	HsCD00041394	100010104	DQ895644	FUSION	BC029268.1
ATG10	83734	HsCD00044495	100005062	DQ892432	CLOSED	BC029268.1
SIGLEC5	8778	HsCD00044496	100005063	DQ892433	CLOSED	BC029896.1
RCAN3	11123	HsCD00041395	100010105	DQ895645	FUSION	BC035854.1
RCAN3	11123	HsCD00044497	100005064	DQ892434	CLOSED	BC035854.1
HSPC171	29100	HsCD00041396	100010106	DQ895646	FUSION	BC003080
RWDD1	51389	HsCD00044498	100005065	DQ892435	CLOSED	NM_015952
UBE2V2	7336	HsCD00076497	100011652	EU176520	FUSION	BC007051.1
RWDD1	51389	HsCD00041397	100010107	DQ895647	FUSION	BC015802.1
RWDD1	51389	HsCD00044499	100005066	DQ892436	CLOSED	BC015802.1
RNF182	221687	HsCD00041398	100010108	DQ895648	FUSION	BC050030
RWDD1	51389	HsCD00044500	100005067	DQ892437	CLOSED	NM_015952
RNF182	221687	HsCD00041399	100010109	DQ895649	FUSION	BC030666.1
RNF182	221687	HsCD00044501	100005068	DQ892438	CLOSED	BC030666.1
GBP5	115362	HsCD00041400	100010110	DQ895650	FUSION	BC031639.1
SAA1	6288	HsCD00044502	100005069	DQ892439	CLOSED	BC105796.1
GBP5	115362	HsCD00076184	100006462	EU176216	CLOSED	BC031639.1
PTGS1	5742	HsCD00041402	100010112	DQ895652	FUSION	BC029840.1
PTGS1	5742	HsCD00044504	100005071	DQ892441	CLOSED	BC029840.1
TRA2A	29896	HsCD00041403	100010113	DQ895653	FUSION	BC017094.1
TRA2A	29896	HsCD00044505	100005072	DQ892442	CLOSED	BC017094.1
GDPD5	81544	HsCD00076185	100011495	EU176521	FUSION	BC030626.1
GDPD5	81544	HsCD00044506	100005073	DQ892443	CLOSED	BC030626.1
FHL5	9457	HsCD00041404	100010114	DQ895654	FUSION	BC021723.1
FHL5	9457	HsCD00045679	100006292	DQ893662	CLOSED	BC021723.1
ProSAPiP1	9762	HsCD00041405	100010115	DQ895655	FUSION	BC038860.1
RNF182	221687	HsCD00044507	100005074	DQ892444	CLOSED	BC050030
DND1	373863	HsCD00076338	100006541	EU176217	CLOSED	NM_194249.1
RPS2	6187	HsCD00041406	100010116	DQ895656	FUSION	BC016178.1
RPS2	6187	HsCD00044508	100005075	DQ892445	CLOSED	BC016178.1
HSPA6	3310	HsCD00041407	100010117	DQ895657	FUSION	BC035665.1
HSPA6	3310	HsCD00044509	100005076	DQ892446	CLOSED	BC035665.1
DLAT	1737	HsCD00041408	100010118	DQ895658	FUSION	BC039084.1
DLAT	1737	HsCD00044510	100005077	DQ892447	CLOSED	BC039084.1
SLC25A18	83733	HsCD00041409	100010119	DQ895659	FUSION	BC031644.1
SLC25A18	83733	HsCD00045677	100006290	DQ893660	CLOSED	BC031644.1
PDE4A	5141	HsCD00041410	100010120	DQ895660	FUSION	BC038234.1
PDE4A	5141	HsCD00044511	100005078	DQ892448	CLOSED	BC038234.1
ADORA3	140	HsCD00041411	100010121	DQ895661	FUSION	BC029831.1
ADORA3	140	HsCD00044512	100005079	DQ892449	CLOSED	BC029831.1
ZDHHC5	25921	HsCD00041412	100010122	DQ895662	FUSION	BC026967.1
ZDHHC5	25921	HsCD00044513	100005080	DQ892450	CLOSED	BC026967.1
TMEM66	51669	HsCD00041413	100010123	DQ895663	FUSION	BC015012.1
TMEM66	51669	HsCD00044514	100005081	DQ892451	CLOSED	BC015012.1
FBXL5	26234	HsCD00041414	100010124	DQ895664	FUSION	BC030656.1
FBXL5	26234	HsCD00044515	100005082	DQ892452	CLOSED	BC030656.1
GPR17	2840	HsCD00041415	100010125	DQ895665	FUSION	BC031653.1
GPR17	2840	HsCD00044516	100005083	DQ892453	CLOSED	BC031653.1
RHOBTB1	9886	HsCD00041416	100010126	DQ895666	FUSION	BC032848.1
RHOBTB1	9886	HsCD00044517	100005084	DQ892454	CLOSED	BC032848.1
DND1	373863	HsCD00041417	100010127	DQ895667	FUSION	BC033496.1
DND1	373863	HsCD00044518	100005085	DQ892455	CLOSED	BC033496.1
CAGE1	285782	HsCD00041418	100010128	DQ895668	FUSION	BC026194.1
CAGE1	285782	HsCD00044519	100005086	DQ892456	CLOSED	BC026194.1
WNT2	7472	HsCD00041419	100010129	DQ895669	FUSION	BC029854.1
WNT2	7472	HsCD00044520	100005087	DQ892457	CLOSED	BC029854.1
SLC44A5	204962	HsCD00041420	100010130	DQ895670	FUSION	BC028743.1
SLC44A5	204962	HsCD00044521	100005088	DQ892458	CLOSED	BC028743.1
IL8RB	3579	HsCD00041421	100010131	DQ895671	FUSION	BC037961.1
IL8RB	3579	HsCD00045678	100006291	DQ893661	CLOSED	BC037961.1
FCRL3	115352	HsCD00041422	100010132	DQ895672	FUSION	BC028933.1
FCRL3	115352	HsCD00044522	100005089	DQ892459	CLOSED	BC028933.1
CXCR3	2833	HsCD00041423	100010133	DQ895673	FUSION	BC034403.1
CXCR3	2833	HsCD00044523	100005090	DQ892460	CLOSED	BC034403.1
GOLGA1	2800	HsCD00044524	100005091	DQ892461	CLOSED	BC032853.1
CCR6	1235	HsCD00041424	100010134	DQ895674	FUSION	BC037960.1
CCR6	1235	HsCD00044525	100005092	DQ892462	CLOSED	BC037960.1
GPHN	10243	HsCD00041425	100010135	DQ895675	FUSION	BC030016.1
GPHN	10243	HsCD00044526	100005093	DQ892463	CLOSED	BC030016.1
CAMK1D	57118	HsCD00041426	100010136	DQ895676	FUSION	BC035745.1
CAMK1D	57118	HsCD00044527	100005094	DQ892464	CLOSED	BC035745.1
SEMA4F	10505	HsCD00041427	100010137	DQ895677	FUSION	BC038411.1
MCM9	254394	HsCD00041428	100010138	DQ895678	FUSION	BC031658.1
MCM9	254394	HsCD00044528	100005095	DQ892465	CLOSED	BC031658.1
SNF1LK	150094	HsCD00041429	100010139	DQ895679	FUSION	BC038504.1
SNF1LK	150094	HsCD00044529	100005096	DQ892466	CLOSED	BC038504.1
RILP	83547	HsCD00041430	100010140	DQ895680	FUSION	BC031621.1
RILP	83547	HsCD00044530	100005097	DQ892467	CLOSED	BC031621.1
KIF9	64147	HsCD00041431	100010141	DQ895681	FUSION	BC030657.1
KIF9	64147	HsCD00044531	100005098	DQ892468	CLOSED	BC030657.1
GIF	2694	HsCD00041432	100010142	DQ895682	FUSION	BC037958.1
GIF	2694	HsCD00044532	100005099	DQ892469	CLOSED	BC037958.1
CXorf20	139105	HsCD00041433	100010143	DQ895683	FUSION	BC037301.1
CXorf20	139105	HsCD00044533	100005100	DQ892470	CLOSED	BC037301.1
KCNJ16	3773	HsCD00044534	100005101	DQ892471	CLOSED	BC033038.1
USP13	8975	HsCD00041434	100010144	DQ895684	FUSION	BC016146.1
USP13	8975	HsCD00044535	100005102	DQ892472	CLOSED	BC016146.1
SYT12	91683	HsCD00041435	100010145	DQ895685	FUSION	BC037406.1
SYT12	91683	HsCD00044536	100005103	DQ892473	CLOSED	BC037406.1
LIG4	3981	HsCD00041436	100010146	DQ895686	FUSION	BC037491.1
LIG4	3981	HsCD00044537	100005104	DQ892474	CLOSED	BC037491.1
SYT4	6860	HsCD00076462	100006600	EU176218	CLOSED	BC036538.1
LGR4	55366	HsCD00041437	100010147	DQ895687	FUSION	BC033039.1
LGR4	55366	HsCD00044538	100005105	DQ892475	CLOSED	BC033039.1
SIGLEC9	27180	HsCD00041438	100010148	DQ895688	FUSION	BC035365.1
SIGLEC9	27180	HsCD00044539	100005106	DQ892476	CLOSED	BC035365.1
PKN1	5585	HsCD00044540	100005107	DQ892477	CLOSED	BC040061.1
PACSIN1	29993	HsCD00041439	100010149	DQ895689	FUSION	BC040228.1
PACSIN1	29993	HsCD00044541	100005108	DQ892478	CLOSED	BC040228.1
COPB1	1315	HsCD00041440	100010150	DQ895690	FUSION	BC037280.1
COPB1	1315	HsCD00044542	100005109	DQ892479	CLOSED	BC037280.1
BPIL1	80341	HsCD00041441	100010151	DQ895691	FUSION	BC034415.1
BPIL1	80341	HsCD00044543	100005110	DQ892480	CLOSED	BC034415.1
EIF4ENIF1	56478	HsCD00041442	100010152	DQ895692	FUSION	BC033028.1
EIF4ENIF1	56478	HsCD00044544	100005111	DQ892481	CLOSED	BC033028.1
ATG4C	84938	HsCD00041443	100010153	DQ895693	FUSION	BC033024.1
ATG4C	84938	HsCD00044545	100005112	DQ892482	CLOSED	BC033024.1
ST5	6764	HsCD00041444	100010154	DQ895694	FUSION	BC036655.1
ST5	6764	HsCD00044546	100005113	DQ892483	CLOSED	BC036655.1
GPBP1L1	60313	HsCD00041445	100010155	DQ895695	FUSION	BC015713.1
GPBP1L1	60313	HsCD00044547	100005114	DQ892484	CLOSED	BC015713.1
EXDL1	161829	HsCD00041446	100010156	DQ895696	FUSION	BC030628.1
EXDL1	161829	HsCD00044548	100005115	DQ892485	CLOSED	BC030628.1
ITGAX	3687	HsCD00041447	100010157	DQ895697	FUSION	BC038237.1
ITGAX	3687	HsCD00044549	100005116	DQ892486	CLOSED	BC038237.1
CCL22	6367	HsCD00039758	100008532	DQ894072	FUSION	BC027952.1
USP12	219333	HsCD00039760	100008534	DQ894074	FUSION	BC026072.1
LRRC25	126364	HsCD00042941	100003554	DQ890924	CLOSED	BC025744.1
TTL	150465	HsCD00039761	100008535	DQ894075	FUSION	BC036819.1
ERAF	51327	HsCD00039762	100008536	DQ894076	FUSION	BC035842.1
ERAF	51327	HsCD00042942	100003555	DQ890925	CLOSED	BC035842.1
MUC7	4589	HsCD00039763	100008537	DQ894077	FUSION	BC025688.1
BET1	10282	HsCD00039764	100008538	DQ894078	FUSION	BC000899.1
KCMF1	56888	HsCD00039765	100008539	DQ894079	FUSION	BC000178.2
HBZ	3050	HsCD00039766	100008540	DQ894080	FUSION	BC027892.1
RAD51L1	5890	HsCD00039767	100008541	DQ894081	FUSION	BC030219.1
RAD51L1	5890	HsCD00042943	100003556	DQ890926	CLOSED	BC030219.1
SGCA	6442	HsCD00039463	100008237	DQ893777	FUSION	BC025702.1
CLEC4M	10332	HsCD00039465	100008239	DQ893779	FUSION	BC038851.1
CIRBP	1153	HsCD00076466	100011636	EU176522	FUSION	BC000901.1
CIRBP	1153	HsCD00076481	100006609	EU176219	CLOSED	BC000901.1
LANCL1	10314	HsCD00039466	100008240	DQ893780	FUSION	BC028685.1
SSR4	6748	HsCD00042499	100011273	DQ896813	FUSION	BC003371.1
SSR4	6748	HsCD00076487	100006611	EU176220	CLOSED	BC003371.1
STK32B	55351	HsCD00039400	100008174	DQ893714	FUSION	BC038238.1
STK32B	55351	HsCD00042571	100003184	DQ890554	CLOSED	BC038238.1
TCF21	6943	HsCD00075935	100011355	EU176523	FUSION	BC025697.1
HBZ	3050	HsCD00076450	100006596	EU176221	CLOSED	M24173.1
TCF21	6943	HsCD00075936	100006353	EU176222	CLOSED	BC025697.1
KRT18	3875	HsCD00039401	100008175	DQ893715	FUSION	BC000180.2
KRT18	3875	HsCD00042572	100003185	DQ890555	CLOSED	BC000180.2
ARF4	378	HsCD00039768	100008542	DQ894082	FUSION	BC003364.1
RAB1A	5861	HsCD00039770	100008544	DQ894084	FUSION	BC000905.2
MYC	4609	HsCD00039771	100008545	DQ894085	FUSION	BC000141.1
SNAP23	8773	HsCD00039772	100008546	DQ894086	FUSION	BC000148.2
NDUFS2	4720	HsCD00039773	100008547	DQ894087	FUSION	BC000170.2
GZMB	3002	HsCD00076470	100011638	EU176524	FUSION	BC030195.1
CTDSPL2	51496	HsCD00039774	100008548	DQ894088	FUSION	BC035744.1
CTDSPL2	51496	HsCD00075937	100006354	EU176223	CLOSED	BC035744.1
YWHAE	7531	HsCD00076474	100011640	EU176525	FUSION	BC000179.2
CCL22	6367	HsCD00076479	100011643	EU176526	FUSION	U83239.1
HYAL1	3373	HsCD00076386	100011593	EU176527	FUSION	BC035695.1
THAP10	56906	HsCD00076482	100011645	EU176528	FUSION	BC027857.1
THAP10	56906	HsCD00042944	100003557	DQ890927	CLOSED	BC027857.1
THAP10	56906	HsCD00039775	100008549	DQ894089	FUSION	BC072414
VGLL1	51442	HsCD00075939	100011357	EU176530	FUSION	BC003362.1
VGLL1	51442	HsCD00042945	100003558	DQ890928	CLOSED	BC003362.1
IL17RB	55540	HsCD00039776	100008550	DQ894090	FUSION	BC000980.1
IL17RB	55540	HsCD00042946	100003559	DQ890929	CLOSED	BC000980.1
CA1	759	HsCD00039777	100008551	DQ894091	FUSION	BC027890.1
CA1	759	HsCD00042947	100003560	DQ890930	CLOSED	BC027890.1
C22orf28	51493	HsCD00039778	100008552	DQ894092	FUSION	BC000151.1
C22orf28	51493	HsCD00042948	100003561	DQ890931	CLOSED	BC000151.1
VRK2	7444	HsCD00039780	100008554	DQ894094	FUSION	BC027854.1
VRK2	7444	HsCD00042949	100003562	DQ890932	CLOSED	BC027854.1
SMN1	6606	HsCD00039781	100008555	DQ894095	FUSION	BC000908.2
SMN1	6606	HsCD00076468	100006603	EU176224	CLOSED	BC000908.2
SNX2	6643	HsCD00039782	100008556	DQ894096	FUSION	BC003382.1
SNX2	6643	HsCD00042950	100003563	DQ890933	CLOSED	BC003382.1
VDAC2	7417	HsCD00039783	100008557	DQ894097	FUSION	BC000165.2
VDAC2	7417	HsCD00042951	100003564	DQ890934	CLOSED	BC000165.2
SMN2	6607	HsCD00076472	100006605	EU176225	CLOSED	NM_022875.1
FCAR	2204	HsCD00039784	100008558	DQ894098	FUSION	BC027953.1
FCAR	2204	HsCD00042952	100003565	DQ890935	CLOSED	BC027953.1
FXYD1	5348	HsCD00076454	100011629	EU176531	FUSION	NM_021902.2
TULP2	7288	HsCD00042953	100003566	DQ890936	CLOSED	BC026070.1
SFRS10	6434	HsCD00076457	100011632	EU176532	FUSION	BC000160.2
SFRS10	6434	HsCD00042954	100003567	DQ890937	CLOSED	BC000160.2
IL2RB	3560	HsCD00039785	100008559	DQ894099	FUSION	BC025691.1
DAZL	1618	HsCD00076498	100006618	EU176226	CLOSED	BC027595.1
EGFL6	25975	HsCD00042955	100003568	DQ890938	CLOSED	BC038587.1
LZTFL1	54585	HsCD00076460	100011633	EU176533	FUSION	BC025988.1
IGSF6	10261	HsCD00076499	100006619	EU176227	CLOSED	NM_005849.2
PKLR	5313	HsCD00076484	100006610	EU176228	CLOSED	BC025737.1
GIMAP7	168537	HsCD00076467	100011637	EU176534	FUSION	BC027613.1
GIMAP7	168537	HsCD00042956	100003569	DQ890939	CLOSED	BC027613.1
AOAH	313	HsCD00039786	100008560	DQ894100	FUSION	BC025698.1
GPR171	29909	HsCD00042958	100003571	DQ890941	CLOSED	BC036815.1
LILRB5	10990	HsCD00039788	100008562	DQ894102	FUSION	BC025704.1
MAGEB2	4113	HsCD00076488	100006612	EU176229	CLOSED	BC026071.1
AFP	174	HsCD00039789	100008563	DQ894103	FUSION	BC027881.1
AFP	174	HsCD00042959	100003572	DQ890942	CLOSED	BC027881.1
NKX2-5	1482	HsCD00039790	100008564	DQ894104	FUSION	BC025711.1
GP1BA	2811	HsCD00039791	100008565	DQ894105	FUSION	BC027955.1
GP1BA	2811	HsCD00042960	100003573	DQ890943	CLOSED	BC027955.1
FRZB	2487	HsCD00039792	100008566	DQ894106	FUSION	BC027855.1
FRZB	2487	HsCD00042961	100003574	DQ890944	CLOSED	BC027855.1
PPP2R1B	5519	HsCD00039793	100008567	DQ894107	FUSION	BC027596.1
PPP2R1B	5519	HsCD00042623	100003236	DQ890606	CLOSED	BC027596.1
ELAVL1	1994	HsCD00076471	100011639	EU176535	FUSION	BC003376.1
ELAVL1	1994	HsCD00075940	100006355	EU176230	CLOSED	BC003376.1
SHCBP1	79801	HsCD00076475	100011641	EU176536	FUSION	BC030699.1
DNAI1	27019	HsCD00076425	100006580	EU176231	CLOSED	BC030583.2
SHCBP1	79801	HsCD00075941	100006356	EU176232	CLOSED	BC030699.1
FKBP6	8468	HsCD00076480	100011644	EU176537	FUSION	BC036817.1
FKBP6	8468	HsCD00076429	100006583	EU176233	CLOSED	BC036817.1
PPP2R1B	5519	HsCD00076483	100011646	EU176538	FUSION	BC027596.2
F13A1	2162	HsCD00076399	100011606	EU176539	FUSION	NM_000129.3
PLSCR4	57088	HsCD00076486	100011648	EU176540	FUSION	BC028354.1
PLSCR4	57088	HsCD00042624	100003237	DQ890607	CLOSED	BC028354.1
THOP1	7064	HsCD00075942	100006357	EU176234	CLOSED	BC000135.2
AKR7A3	22977	HsCD00075943	100011358	EU176541	FUSION	BC025709.1
AKR7A3	22977	HsCD00076434	100006584	EU176235	CLOSED	BC025709.1
GJA4	2701	HsCD00042625	100003238	DQ890608	CLOSED	BC027889.1
CYSLTR1	10800	HsCD00075944	100011359	EU176542	FUSION	BC035750.1
CYSLTR1	10800	HsCD00042964	100003577	DQ890947	CLOSED	BC035750.1
SLC22A6	9356	HsCD00044153	100004710	DQ892080	CLOSED	BC033682.1
GSG1	83445	HsCD00041036	100009734	DQ895274	FUSION	BC033854.1
CD5L	922	HsCD00041060	100009758	DQ895298	FUSION	BC033586.1
CD5L	922	HsCD00045632	100006245	DQ893615	CLOSED	BC033586.1
NUP133	55746	HsCD00075964	100006365	EU176236	CLOSED	BC020107.1
CBARA1	10367	HsCD00075965	100011372	EU176543	FUSION	BC016641.1
CBARA1	10367	HsCD00043104	100003717	DQ891087	CLOSED	BC016641.1
TYROBP	7305	HsCD00043109	100003722	DQ891092	CLOSED	BC011175.1
ACAD8	27034	HsCD00039961	100008735	DQ894275	FUSION	BC001964.1
PFN1	5216	HsCD00039968	100008742	DQ894282	FUSION	BC006768.1
PFN1	5216	HsCD00043117	100003730	DQ891100	CLOSED	BC006768.1
FBXW11	23291	HsCD00039990	100008764	DQ894304	FUSION	BC026213.1
FBXW11	23291	HsCD00043142	100003755	DQ891125	CLOSED	BC026213.1
DNAI1	27019	HsCD00042626	100003239	DQ890609	CLOSED	BC030583.1
SUGT1	10910	HsCD00039794	100008568	DQ894108	FUSION	BC000911.1
SUGT1	10910	HsCD00042962	100003575	DQ890945	CLOSED	BC000911.1
F13A1	2162	HsCD00039795	100008569	DQ894109	FUSION	BC027963.1
F13A1	2162	HsCD00045578	100006191	DQ893561	CLOSED	BC027963.1
AMD1	262	HsCD00039796	100008570	DQ894110	FUSION	BC000171.2
MAP7	9053	HsCD00042498	100011272	DQ896812	FUSION	BC025777.1
MAP7	9053	HsCD00042963	100003576	DQ890946	CLOSED	BC025777.1
PNPLA8	50640	HsCD00039797	100008571	DQ894111	FUSION	BC032999.1
PNPLA8	50640	HsCD00042965	100003578	DQ890948	CLOSED	BC032999.1
SHCBP1	79801	HsCD00076500	100011653	EU176544	FUSION	BC030699.1
GNA14	9630	HsCD00042966	100003579	DQ890949	CLOSED	NM_004297
ADAM30	11085	HsCD00039798	100008572	DQ894112	FUSION	BC028372.1
ADAM30	11085	HsCD00042967	100003580	DQ890950	CLOSED	BC028372.1
STRAP	11171	HsCD00039799	100008573	DQ894113	FUSION	BC000162.2
STRAP	11171	HsCD00042968	100003581	DQ890951	CLOSED	BC000162.2
KIFAP3	22920	HsCD00039800	100008574	DQ894114	FUSION	BC028679.1
KIFAP3	22920	HsCD00042969	100003582	DQ890952	CLOSED	BC028679.1
CD2	914	HsCD00039801	100008575	DQ894115	FUSION	BC033583.1
CD2	914	HsCD00042970	100003583	DQ890953	CLOSED	BC033583.1
GNA14	9630	HsCD00039802	100008576	DQ894116	FUSION	BC027886.1
GNA14	9630	HsCD00042971	100003584	DQ890954	CLOSED	BC027886.1
AXL	558	HsCD00039803	100008577	DQ894117	FUSION	BC032229.1
RFC3	5983	HsCD00039804	100008578	DQ894118	FUSION	BC000149.2
RFC3	5983	HsCD00042972	100003585	DQ890955	CLOSED	BC000149.2
RBBP8	5932	HsCD00039805	100008579	DQ894119	FUSION	BC030590.1
RBBP8	5932	HsCD00042973	100003586	DQ890956	CLOSED	BC030590.1
PTGFR	5737	HsCD00039806	100008580	DQ894120	FUSION	BC035694.1
PTGFR	5737	HsCD00042974	100003587	DQ890957	CLOSED	BC035694.1
SLC25A3	5250	HsCD00075945	100011360	EU176545	FUSION	BC000998.2
SLC25A3	5250	HsCD00042975	100003588	DQ890958	CLOSED	BC000998.2
TDRD7	23424	HsCD00039807	100008581	DQ894121	FUSION	BC028694.1
GNA14	9630	HsCD00076501	100006620	EU176237	CLOSED	AF493903.1
SPINK1	6690	HsCD00042528	100011302	DQ896842	FUSION	BC025790.1
SPINK1	6690	HsCD00045630	100006243	DQ893613	CLOSED	BC025790.1
TEKT2	27285	HsCD00040996	100009694	DQ895234	FUSION	BC035620.1
TEKT2	27285	HsCD00044115	100004672	DQ892042	CLOSED	BC035620.1
FXYD1	5348	HsCD00076417	100006575	EU176238	CLOSED	BC032800.2
RNF38	152006	HsCD00040997	100009695	DQ895235	FUSION	BC033786.1
RNF38	152006	HsCD00076110	100006425	EU176239	CLOSED	BC033786.1
CCL19	6363	HsCD00040998	100009696	DQ895236	FUSION	BC027968.1
CCL19	6363	HsCD00076111	100006426	EU176240	CLOSED	BC027968.1
CPA6	57094	HsCD00040999	100009697	DQ895237	FUSION	BC033684.1
CPA6	57094	HsCD00044116	100004673	DQ892043	CLOSED	BC033684.1
APOC3	345	HsCD00041000	100009698	DQ895238	FUSION	BC027977.1
APOC3	345	HsCD00044117	100004674	DQ892044	CLOSED	BC027977.1
CD177	57126	HsCD00041001	100009699	DQ895239	FUSION	BC029167.1
CD177	57126	HsCD00044118	100004675	DQ892045	CLOSED	BC029167.1
PNCK	139728	HsCD00041002	100009700	DQ895240	FUSION	BC033746.1
PNCK	139728	HsCD00044119	100004676	DQ892046	CLOSED	BC033746.1
EFEMP2	30008	HsCD00041003	100009701	DQ895241	FUSION	BC010456.1
EFEMP2	30008	HsCD00044120	100004677	DQ892047	CLOSED	BC010456.1
CCL21	6366	HsCD00041004	100009702	DQ895242	FUSION	BC027918.1
CCL21	6366	HsCD00044121	100004678	DQ892048	CLOSED	BC027918.1
GDI1	2664	HsCD00041005	100009703	DQ895243	FUSION	BC012201.1
GDI1	2664	HsCD00044122	100004679	DQ892049	CLOSED	BC012201.1
GDI1	2664	HsCD00042529	100011303	DQ896843	FUSION	BC012201.1
GABRD	2563	HsCD00044123	100004680	DQ892050	CLOSED	BC033801.1
CPN1	1369	HsCD00041006	100009704	DQ895244	FUSION	BC027897.1
CPN1	1369	HsCD00044124	100004681	DQ892051	CLOSED	BC027897.1
CPN1	1369	HsCD00041007	100009705	DQ895245	FUSION	BC027897.1
CD4	920	HsCD00041008	100009706	DQ895246	FUSION	BC025782.1
CD4	920	HsCD00044125	100004682	DQ892052	CLOSED	BC025782.1
TRAT1	50852	HsCD00041009	100009707	DQ895247	FUSION	BC025713.1
TRAT1	50852	HsCD00044126	100004683	DQ892053	CLOSED	BC025713.1
ADC	113451	HsCD00041010	100009708	DQ895248	FUSION	BC010449.1
ADC	113451	HsCD00044127	100004684	DQ892054	CLOSED	BC010449.1
DPT	1805	HsCD00041011	100009709	DQ895249	FUSION	BC033736.1
DPT	1805	HsCD00044128	100004685	DQ892055	CLOSED	BC033736.1
ALG10	84920	HsCD00041012	100009710	DQ895250	FUSION	BC033730.1
ALG10	84920	HsCD00044129	100004686	DQ892056	CLOSED	BC033730.1
FKBP11	51303	HsCD00041013	100009711	DQ895251	FUSION	BC027973.1
FKBP11	51303	HsCD00044130	100004687	DQ892057	CLOSED	BC027973.1
CAMK1G	57172	HsCD00041015	100009713	DQ895253	FUSION	BC032787.1
CAMK1G	57172	HsCD00044133	100004690	DQ892060	CLOSED	BC032787.1
C10orf10	11067	HsCD00041016	100009714	DQ895254	FUSION	BC011402.1
C10orf10	11067	HsCD00044134	100004691	DQ892061	CLOSED	BC011402.1
CAMK2D	817	HsCD00041017	100009715	DQ895255	FUSION	BC032784.1
CAMK2D	817	HsCD00076112	100006427	EU176241	CLOSED	BC032784.1
FGFBP2	83888	HsCD00041018	100009716	DQ895256	FUSION	BC025720.1
FGFBP2	83888	HsCD00044135	100004692	DQ892062	CLOSED	BC025720.1
DUSP10	11221	HsCD00041019	100009717	DQ895257	FUSION	BC031405.1
SCAMP4	113178	HsCD00044136	100004693	DQ892063	CLOSED	BC062598
DUSP10	11221	HsCD00076113	100006428	EU176242	CLOSED	BC031405.1
SCAMP4	113178	HsCD00041020	100009718	DQ895258	FUSION	BC016509.1
SCAMP4	113178	HsCD00044137	100004694	DQ892064	CLOSED	BC016509.1
ETV4	2118	HsCD00041021	100009719	DQ895259	FUSION	BC016623.1
ETV4	2118	HsCD00044138	100004695	DQ892065	CLOSED	BC016623.1
SCAMP4	113178	HsCD00044139	100004696	DQ892066	CLOSED	BC062598
CYB5R4	51167	HsCD00041022	100009720	DQ895260	FUSION	BC025380.1
CYB5R4	51167	HsCD00044140	100004697	DQ892067	CLOSED	AF169803
GZMH	2999	HsCD00041023	100009721	DQ895261	FUSION	BC027974.1
GZMH	2999	HsCD00044141	100004698	DQ892068	CLOSED	BC027974.1
FRS3	10817	HsCD00041030	100009728	DQ895268	FUSION	BC010611.1
FRS3	10817	HsCD00044148	100004705	DQ892075	CLOSED	BC010611.1
C10orf63	219670	HsCD00041031	100009729	DQ895269	FUSION	BC026165.1
C10orf63	219670	HsCD00044149	100004706	DQ892076	CLOSED	BC026165.1
CD5	921	HsCD00041032	100009730	DQ895270	FUSION	BC027901.1
CD5	921	HsCD00044150	100004707	DQ892077	CLOSED	BC027901.1
KCNIP3	30818	HsCD00041033	100009731	DQ895271	FUSION	BC012850.1
KCNIP3	30818	HsCD00044151	100004708	DQ892078	CLOSED	BC012850.1
FSCN3	29999	HsCD00041024	100009722	DQ895262	FUSION	BC035606.1
FSCN3	29999	HsCD00044142	100004699	DQ892069	CLOSED	BC035606.1
SRrp35	135295	HsCD00041025	100009723	DQ895263	FUSION	BC021715.1
SRrp35	135295	HsCD00044143	100004700	DQ892070	CLOSED	BC021715.1
TRAF2	7186	HsCD00045633	100006246	DQ893616	CLOSED	BC032410.1
CA7	766	HsCD00041026	100009724	DQ895264	FUSION	BC033865.1
CA7	766	HsCD00076114	100006429	EU176243	CLOSED	BC033865.1
GTF3C5	9328	HsCD00041027	100009725	DQ895265	FUSION	BC011355.1
GTF3C5	9328	HsCD00044144	100004701	DQ892071	CLOSED	BC011355.1
LAIR1	3903	HsCD00041028	100009726	DQ895266	FUSION	BC027899.1
LAIR1	3903	HsCD00044145	100004702	DQ892072	CLOSED	BC027899.1
PHGDH	26227	HsCD00076115	100011458	EU176546	FUSION	BC011262.1
PHGDH	26227	HsCD00044146	100004703	DQ892073	CLOSED	BC011262.1
RGR	5995	HsCD00041029	100009727	DQ895267	FUSION	BC011349.1
RGR	5995	HsCD00044147	100004704	DQ892074	CLOSED	BC011349.1
SLC22A7	10864	HsCD00042530	100011304	DQ896844	FUSION	BC033805.1
SLC22A7	10864	HsCD00045631	100006244	DQ893614	CLOSED	BC033805.1
ASPA	443	HsCD00041034	100009732	DQ895272	FUSION	BC029128.1
ASPA	443	HsCD00044152	100004709	DQ892079	CLOSED	BC029128.1
SLC22A6	9356	HsCD00041035	100009733	DQ895273	FUSION	BC033682.1
GSG1	83445	HsCD00044154	100004711	DQ892081	CLOSED	BC033854.1
CCT8L2	150160	HsCD00041037	100009735	DQ895275	FUSION	BC033797.1
CCT8L2	150160	HsCD00044155	100004712	DQ892082	CLOSED	BC033797.1
HMGCL	3155	HsCD00041038	100009736	DQ895276	FUSION	BC010570.1
HMGCL	3155	HsCD00044156	100004713	DQ892083	CLOSED	BC010570.1
GPNMB	10457	HsCD00041039	100009737	DQ895277	FUSION	BC032783.1
GPNMB	10457	HsCD00044157	100004714	DQ892084	CLOSED	BC032783.1
B3GAT1	27087	HsCD00041040	100009738	DQ895278	FUSION	BC010466.1
LSAMP	4045	HsCD00041054	100009752	DQ895292	FUSION	BC033803.1
LSAMP	4045	HsCD00044172	100004729	DQ892099	CLOSED	BC033803.1
TFAP4	7023	HsCD00041055	100009753	DQ895293	FUSION	BC010576.1
TFAP4	7023	HsCD00045634	100006247	DQ893617	CLOSED	BC010576.1
CLGN	1047	HsCD00044173	100004730	DQ892100	CLOSED	BC028357.1
CXCR6	10663	HsCD00041056	100009754	DQ895294	FUSION	BC033584.1
CXCR6	10663	HsCD00044174	100004731	DQ892101	CLOSED	BC033584.1
CLGN	1047	HsCD00041057	100009755	DQ895295	FUSION	NM_004362
LOC727811	727811	HsCD00041058	100009756	DQ895296	FUSION	BC025717.1
LOC727811	727811	HsCD00044175	100004732	DQ892102	CLOSED	BC025717.1
PABPC3	5042	HsCD00041059	100009757	DQ895297	FUSION	BC027617.1
PABPC3	5042	HsCD00044176	100004733	DQ892103	CLOSED	BC027617.1
ACCN4	55515	HsCD00044177	100004734	DQ892104	CLOSED	BC010439.1
FPRL1	2358	HsCD00040413	100009759	DQ895299	FUSION	BC029125.2
FPRL1	2358	HsCD00043551	100004735	DQ892105	CLOSED	BC029125.2
UBQLN3	50613	HsCD00076116	100006430	EU176244	CLOSED	BC036743.1
TMEM115	11070	HsCD00040414	100009760	DQ895300	FUSION	BC011948.1
TMEM115	11070	HsCD00043552	100004736	DQ892106	CLOSED	BC011948.1
APPL2	55198	HsCD00040415	100009761	DQ895301	FUSION	BC033731.1
APPL2	55198	HsCD00043553	100004737	DQ892107	CLOSED	BC033731.1
BXDC2	55299	HsCD00040416	100009762	DQ895302	FUSION	BC036741.1
BXDC2	55299	HsCD00043554	100004738	DQ892108	CLOSED	BC036741.1
PAK6	56924	HsCD00040417	100009763	DQ895303	FUSION	BC035596.1
PAK6	56924	HsCD00043555	100004739	DQ892109	CLOSED	BC035596.1
CHST4	10164	HsCD00040418	100009764	DQ895304	FUSION	BC035282.1
CHST4	10164	HsCD00043556	100004740	DQ892110	CLOSED	BC035282.1
RHPN2	85415	HsCD00040419	100009765	DQ895305	FUSION	BC036447.1
RHPN2	85415	HsCD00043557	100004741	DQ892111	CLOSED	BC036447.1
FMOD	2331	HsCD00040420	100009766	DQ895306	FUSION	BC035281.1
FMOD	2331	HsCD00043558	100004742	DQ892112	CLOSED	BC035281.1
TSGA10	80705	HsCD00040421	100009767	DQ895307	FUSION	BC028366.1
TSGA10	80705	HsCD00043559	100004743	DQ892113	CLOSED	BC028366.1
CCR7	1236	HsCD00040422	100009768	DQ895308	FUSION	BC035343.1
CCR7	1236	HsCD00043560	100004744	DQ892114	CLOSED	BC035343.1
GLE1L	2733	HsCD00040423	100009769	DQ895309	FUSION	BC030012.1
GLE1L	2733	HsCD00076117	100006431	EU176245	CLOSED	BC030012.1
SLC30A3	7781	HsCD00040424	100009770	DQ895310	FUSION	BC028358.1
SLC30A3	7781	HsCD00044178	100004745	DQ892115	CLOSED	BC028358.1
MX2	4600	HsCD00041061	100009771	DQ895311	FUSION	BC035293.1
MX2	4600	HsCD00044179	100004746	DQ892116	CLOSED	BC035293.1
RFX2	5990	HsCD00041062	100009772	DQ895312	FUSION	BC028579.1
RFX2	5990	HsCD00076118	100006432	EU176246	CLOSED	BC028579.1
SELPLG	6404	HsCD00041063	100009773	DQ895313	FUSION	BC029782.1
SELPLG	6404	HsCD00044180	100004747	DQ892117	CLOSED	BC029782.1
LAMP3	27074	HsCD00044181	100004748	DQ892118	CLOSED	BC032940.1
HPN	3249	HsCD00041064	100009774	DQ895314	FUSION	BC025716.1
HPN	3249	HsCD00044182	100004749	DQ892119	CLOSED	BC025716.1
PREB	10113	HsCD00044183	100004750	DQ892120	CLOSED	BC016472.1
INPP4A	3631	HsCD00041065	100009775	DQ895315	FUSION	BC028361.1
KCNIP3	30818	HsCD00041066	100009776	DQ895316	FUSION	BC012850.1
SLC30A4	7782	HsCD00076119	100011459	EU176547	FUSION	BC026089.1
SLC30A4	7782	HsCD00044184	100004751	DQ892121	CLOSED	BC026089.1
TEK	7010	HsCD00076120	100011460	EU176548	FUSION	BC035514.1
TEK	7010	HsCD00044185	100004752	DQ892122	CLOSED	BC035514.1
SPZ1	84654	HsCD00041067	100009777	DQ895317	FUSION	BC033798.1
SPZ1	84654	HsCD00044186	100004753	DQ892123	CLOSED	BC033798.1
PDGFRB	5159	HsCD00076121	100011461	EU176549	FUSION	BC032224.1
PDGFRB	5159	HsCD00044187	100004754	DQ892124	CLOSED	BC032224.1
FOXN3	1112	HsCD00039878	100008652	DQ894192	FUSION	BC010460.1
FOXN3	1112	HsCD00043029	100003642	DQ891012	CLOSED	BC010460.1
METAP2	10988	HsCD00039879	100008653	DQ894193	FUSION	BC013782.1
METAP2	10988	HsCD00043030	100003643	DQ891013	CLOSED	BC013782.1
CDC42SE1	56882	HsCD00039880	100008654	DQ894194	FUSION	BC012796.2
GSK3A	2931	HsCD00039881	100008655	DQ894195	FUSION	BC027984.1
GSK3A	2931	HsCD00043031	100003644	DQ891014	CLOSED	BC027984.1
KCNE3	10008	HsCD00043032	100003645	DQ891015	CLOSED	BC032235.1
AGT	183	HsCD00039882	100008656	DQ894196	FUSION	BC011519.1
AGT	183	HsCD00043033	100003646	DQ891016	CLOSED	BC011519.1
TCEB1	6921	HsCD00039883	100008657	DQ894197	FUSION	BC013809.1
TCEB1	6921	HsCD00075954	100006361	EU176247	CLOSED	BC013809.1
SLC38A1	81539	HsCD00075955	100011366	EU176550	FUSION	BC010620.1
SLC38A1	81539	HsCD00043034	100003647	DQ891017	CLOSED	BC010620.1
GHRL	51738	HsCD00039884	100008658	DQ894198	FUSION	BC025791.1
GHRL	51738	HsCD00043035	100003648	DQ891018	CLOSED	BC025791.1
SLC23A3	151295	HsCD00039885	100008659	DQ894199	FUSION	BC030243.1
SLC23A3	151295	HsCD00043036	100003649	DQ891019	CLOSED	BC030243.1
PPBP	5473	HsCD00039886	100008660	DQ894200	FUSION	BC028217.1
PPBP	5473	HsCD00043037	100003650	DQ891020	CLOSED	BC028217.1
AHCYL1	10768	HsCD00039887	100008661	DQ894201	FUSION	BC010681.1
AHCYL1	10768	HsCD00043038	100003651	DQ891021	CLOSED	BC010681.1
MGC40069	348035	HsCD00039888	100008662	DQ894202	FUSION	BC032242.1
PRELID1	27166	HsCD00043059	100003672	DQ891042	CLOSED	BC013748.1
PAPSS1	9061	HsCD00039908	100008682	DQ894222	FUSION	BC011392.1
GALNTL2	117248	HsCD00039918	100008692	DQ894232	FUSION	BC014789.1
GALNTL2	117248	HsCD00043070	100003683	DQ891053	CLOSED	BC014789.1
B3GNT5	84002	HsCD00043087	100003700	DQ891070	CLOSED	BC028058.1
LENG8	114823	HsCD00039939	100008713	DQ894253	FUSION	BC028048.1
S100P	6286	HsCD00039956	100008730	DQ894270	FUSION	BC006819.1
S100P	6286	HsCD00043105	100003718	DQ891088	CLOSED	BC006819.1
SLC2A3	6515	HsCD00039983	100008757	DQ894297	FUSION	BC039196.1
SLC2A3	6515	HsCD00043135	100003748	DQ891118	CLOSED	BC039196.1
DUSP19	142679	HsCD00043223	100003836	DQ891206	CLOSED	BC035000.1
KDELC1	79070	HsCD00040076	100008850	DQ894390	FUSION	BC001297.1
MGC40069	348035	HsCD00043039	100003652	DQ891022	CLOSED	BC032242.1
SLC7A6	9057	HsCD00039889	100008663	DQ894203	FUSION	BC028216.1
SLC7A6	9057	HsCD00043040	100003653	DQ891023	CLOSED	BC028216.1
HIST1H2AG	8969	HsCD00039890	100008664	DQ894204	FUSION	BC016677.1
HIST1H2AG	8969	HsCD00043041	100003654	DQ891024	CLOSED	BC016677.1
USP3	9960	HsCD00039891	100008665	DQ894205	FUSION	BC018113.1
USP3	9960	HsCD00043042	100003655	DQ891025	CLOSED	BC018113.1
TNNC1	7134	HsCD00039892	100008666	DQ894206	FUSION	BC030244.1
TNNC1	7134	HsCD00043043	100003656	DQ891026	CLOSED	BC030244.1
PTBP2	58155	HsCD00075956	100011367	EU176551	FUSION	BC016582.1
PTBP2	58155	HsCD00043044	100003657	DQ891027	CLOSED	BC016582.1
HIST1H2BN	8341	HsCD00039893	100008667	DQ894207	FUSION	BC011372.1
HIST1H2BN	8341	HsCD00043045	100003658	DQ891028	CLOSED	BC011372.1
CBS	875	HsCD00039894	100008668	DQ894208	FUSION	BC011381.1
CBS	875	HsCD00043046	100003659	DQ891029	CLOSED	BC011381.1
KLRD1	3824	HsCD00039895	100008669	DQ894209	FUSION	BC028009.1
KLRD1	3824	HsCD00043047	100003660	DQ891030	CLOSED	BC028009.1
ATP5A1	498	HsCD00039896	100008670	DQ894210	FUSION	BC011384.1
ATP5A1	498	HsCD00042574	100003187	DQ890557	CLOSED	BC011384.1
CBFB	865	HsCD00039405	100008179	DQ893719	FUSION	BC018509.1
CBFB	865	HsCD00042575	100003188	DQ890558	CLOSED	BC018509.1
IL10RA	3587	HsCD00039406	100008180	DQ893720	FUSION	BC028082.1
IL10RA	3587	HsCD00043048	100003661	DQ891031	CLOSED	BC028082.1
TPD52	7163	HsCD00039897	100008671	DQ894211	FUSION	BC018117.1
TPD52	7163	HsCD00043049	100003662	DQ891032	CLOSED	BC018117.1
PINK1	65018	HsCD00039898	100008672	DQ894212	FUSION	BC028215.1
PINK1	65018	HsCD00043050	100003663	DQ891033	CLOSED	BC028215.1
CD164	8763	HsCD00039899	100008673	DQ894213	FUSION	BC011522.1
CD164	8763	HsCD00043051	100003664	DQ891034	CLOSED	BC011522.1
GGTLA1	2687	HsCD00039900	100008674	DQ894214	FUSION	BC011362.1
GGTLA1	2687	HsCD00043052	100003665	DQ891035	CLOSED	BC011362.1
RAB24	53917	HsCD00039901	100008675	DQ894215	FUSION	BC015534.1
RAB24	53917	HsCD00043053	100003666	DQ891036	CLOSED	BC015534.1
SLU7	10569	HsCD00039902	100008676	DQ894216	FUSION	BC010634.1
SLU7	10569	HsCD00043054	100003667	DQ891037	CLOSED	BC010634.1
MAD2L2	10459	HsCD00039903	100008677	DQ894217	FUSION	BC015244.1
MAD2L2	10459	HsCD00043055	100003668	DQ891038	CLOSED	BC015244.1
PAK4	10298	HsCD00039904	100008678	DQ894218	FUSION	BC011368.1
PAK4	10298	HsCD00043056	100003669	DQ891039	CLOSED	BC011368.1
STMN4	81551	HsCD00039905	100008679	DQ894219	FUSION	BC011520.1
STMN4	81551	HsCD00043057	100003670	DQ891040	CLOSED	BC011520.1
BCHE	590	HsCD00039906	100008680	DQ894220	FUSION	BC018141.1
BCHE	590	HsCD00043058	100003671	DQ891041	CLOSED	BC018141.1
PRELID1	27166	HsCD00039907	100008681	DQ894221	FUSION	BC013748.1
PAPSS1	9061	HsCD00043060	100003673	DQ891043	CLOSED	BC011392.1
PRSS2	5645	HsCD00039909	100008683	DQ894223	FUSION	BC030260.1
PRSS2	5645	HsCD00043061	100003674	DQ891044	CLOSED	BC030260.1
PLK1	5347	HsCD00039910	100008684	DQ894224	FUSION	BC014846.1
PLK1	5347	HsCD00043062	100003675	DQ891045	CLOSED	BC014846.1
RTP4	64108	HsCD00039911	100008685	DQ894225	FUSION	BC013161.1
RTP4	64108	HsCD00043063	100003676	DQ891046	CLOSED	BC013161.1
PPM1D	8493	HsCD00075957	100011368	EU176552	FUSION	BC016480.1
PPM1D	8493	HsCD00043064	100003677	DQ891047	CLOSED	BC016480.1
HLA-DOA	3111	HsCD00039912	100008686	DQ894226	FUSION	BC013183.1
HLA-DOA	3111	HsCD00043065	100003678	DQ891048	CLOSED	BC013183.1
LBR	3930	HsCD00039913	100008687	DQ894227	FUSION	BC020079.1
LBR	3930	HsCD00043066	100003679	DQ891049	CLOSED	BC020079.1
RPL8	6132	HsCD00075958	100011369	EU176553	FUSION	BC013104.1
RPL8	6132	HsCD00045326	100005939	DQ893309	CLOSED	BC013104.1
CRTC1	23373	HsCD00039914	100008688	DQ894228	FUSION	BC028050.1
CRTC1	23373	HsCD00045327	100005940	DQ893310	CLOSED	BC028050.1
HLA-DPB1	3115	HsCD00039915	100008689	DQ894229	FUSION	BC013184.1
HLA-DPB1	3115	HsCD00043067	100003680	DQ891050	CLOSED	BC013184.1
IL27RA	9466	HsCD00039916	100008690	DQ894230	FUSION	BC028003.1
IL27RA	9466	HsCD00043068	100003681	DQ891051	CLOSED	BC028003.1
WBP2	23558	HsCD00039917	100008691	DQ894231	FUSION	BC010616.1
WBP2	23558	HsCD00043069	100003682	DQ891052	CLOSED	BC010616.1
FOSL1	8061	HsCD00039919	100008693	DQ894233	FUSION	BC016648.1
FOSL1	8061	HsCD00043071	100003684	DQ891054	CLOSED	BC016648.1
CD93	22918	HsCD00039920	100008694	DQ894234	FUSION	BC028075.1
CD93	22918	HsCD00043072	100003685	DQ891055	CLOSED	BC028075.1
TPSAB1	7177	HsCD00039921	100008695	DQ894235	FUSION	BC028059.1
TPSAB1	7177	HsCD00043073	100003686	DQ891056	CLOSED	BC028059.1
PRAM1	84106	HsCD00043074	100003687	DQ891057	CLOSED	BC028012.1
STOM	2040	HsCD00039922	100008696	DQ894236	FUSION	BC010703.1
STOM	2040	HsCD00043075	100003688	DQ891058	CLOSED	BC010703.1
BMX	660	HsCD00042500	100011274	DQ896814	FUSION	BC016652.1
BMX	660	HsCD00043076	100003689	DQ891059	CLOSED	BC016652.1
SC4MOL	6307	HsCD00039923	100008697	DQ894237	FUSION	BC010653.1
SC4MOL	6307	HsCD00043077	100003690	DQ891060	CLOSED	BC010653.1
SLC20A1	6574	HsCD00039924	100008698	DQ894238	FUSION	BC019944.1
SLC20A1	6574	HsCD00045579	100006192	DQ893562	CLOSED	BC019944.1
CRX	1406	HsCD00039925	100008699	DQ894239	FUSION	BC016664.1
CRX	1406	HsCD00045581	100006194	DQ893564	CLOSED	BC016664.1
LRCH4	4034	HsCD00039926	100008700	DQ894240	FUSION	BC018529.1
LRCH4	4034	HsCD00045582	100006195	DQ893565	CLOSED	BC018529.1
TRIM44	54765	HsCD00039927	100008701	DQ894241	FUSION	BC013166.1
TRIM44	54765	HsCD00043078	100003691	DQ891061	CLOSED	BC013166.1
IFI16	3428	HsCD00039928	100008702	DQ894242	FUSION	BC017059.1
IFI16	3428	HsCD00043079	100003692	DQ891062	CLOSED	BC017059.1
CX3CR1	1524	HsCD00039929	100008703	DQ894243	FUSION	BC028078.1
CX3CR1	1524	HsCD00043080	100003693	DQ891063	CLOSED	BC028078.1
NFE2L1	4779	HsCD00039930	100008704	DQ894244	FUSION	BC010623.1
NFE2L1	4779	HsCD00045325	100005938	DQ893308	CLOSED	BC010623.1
CHST10	9486	HsCD00039931	100008705	DQ894245	FUSION	BC010441.1
CHST10	9486	HsCD00043081	100003694	DQ891064	CLOSED	BC010441.1
BOP1	23246	HsCD00042501	100011275	DQ896815	FUSION	BC013787.1
BOP1	23246	HsCD00075959	100006362	EU176248	CLOSED	BC013787.1
ALDOA	226	HsCD00039932	100008706	DQ894246	FUSION	BC010660.1
ALDOA	226	HsCD00043082	100003695	DQ891065	CLOSED	BC010660.1
BANK1	55024	HsCD00039933	100008707	DQ894247	FUSION	BC032241.1
BANK1	55024	HsCD00043083	100003696	DQ891066	CLOSED	BC032241.1
TPST1	8460	HsCD00039934	100008708	DQ894248	FUSION	BC013188.1
TPST1	8460	HsCD00045580	100006193	DQ893563	CLOSED	BC013188.1
LOXL4	84171	HsCD00039935	100008709	DQ894249	FUSION	BC013153.1
LOXL4	84171	HsCD00043084	100003697	DQ891067	CLOSED	BC013153.1
TRAM2	9697	HsCD00039936	100008710	DQ894250	FUSION	BC028121.1
TRAM2	9697	HsCD00043085	100003698	DQ891068	CLOSED	BC028121.1
ITGB1	3688	HsCD00039937	100008711	DQ894251	FUSION	BC020057.1
ITGB1	3688	HsCD00043086	100003699	DQ891069	CLOSED	BC020057.1
B3GNT5	84002	HsCD00039938	100008712	DQ894252	FUSION	BC028058.1
LENG8	114823	HsCD00076458	100006598	EU176249	CLOSED	BC028048.1
ASAH1	427	HsCD00039940	100008714	DQ894254	FUSION	BC016481.1
ASAH1	427	HsCD00043088	100003701	DQ891071	CLOSED	BC016481.1
TUBGCP3	10426	HsCD00039941	100008715	DQ894255	FUSION	BC013781.1
TUBGCP3	10426	HsCD00043089	100003702	DQ891072	CLOSED	BC013781.1
MAT1A	4143	HsCD00039942	100008716	DQ894256	FUSION	BC018359.1
MAT1A	4143	HsCD00043090	100003703	DQ891073	CLOSED	BC018359.1
URG4	55665	HsCD00043091	100003704	DQ891074	CLOSED	BC018426.1
LILRA3	11026	HsCD00039944	100008718	DQ894258	FUSION	BC028208.1
LILRA3	11026	HsCD00043092	100003705	DQ891075	CLOSED	BC028208.1
MYO1F	4542	HsCD00043093	100003706	DQ891076	CLOSED	BC028071.1
ATP2C1	27032	HsCD00075960	100006363	EU176250	CLOSED	BC028139.1
TMEM5	10329	HsCD00039945	100008719	DQ894259	FUSION	BC013152.1
TMEM5	10329	HsCD00043094	100003707	DQ891077	CLOSED	BC013152.1
HK3	3101	HsCD00039946	100008720	DQ894260	FUSION	BC028129.1
HK3	3101	HsCD00043095	100003708	DQ891078	CLOSED	BC028129.1
KIR3DL1	3811	HsCD00039947	100008721	DQ894261	FUSION	BC028206.1
KIR3DL1	3811	HsCD00043096	100003709	DQ891079	CLOSED	BC028206.1
VPS54	51542	HsCD00039948	100008722	DQ894262	FUSION	BC030275.1
VPS54	51542	HsCD00043097	100003710	DQ891080	CLOSED	BC030275.1
TAF1A	9015	HsCD00039949	100008723	DQ894263	FUSION	BC013808.1
TAF1A	9015	HsCD00043098	100003711	DQ891081	CLOSED	BC013808.1
MED24	9862	HsCD00039950	100008724	DQ894264	FUSION	BC011375.1
MED24	9862	HsCD00043099	100003712	DQ891082	CLOSED	BC011375.1
OLFM2	93145	HsCD00039951	100008725	DQ894265	FUSION	BC011361.1
OLFM2	93145	HsCD00043100	100003713	DQ891083	CLOSED	BC011361.1
RBL1	5933	HsCD00039469	100008243	DQ893783	FUSION	BC032247.1
RBL1	5933	HsCD00042629	100003242	DQ890612	CLOSED	BC032247.1
CHN1	1123	HsCD00039470	100008244	DQ893784	FUSION	BC011393.1
CHN1	1123	HsCD00042630	100003243	DQ890613	CLOSED	BC011393.1
NLRP12	91662	HsCD00039952	100008726	DQ894266	FUSION	BC028069.1
NLRP12	91662	HsCD00043101	100003714	DQ891084	CLOSED	BC028069.1
GABRA5	2558	HsCD00039953	100008727	DQ894267	FUSION	BC011403.1
GABRA5	2558	HsCD00075961	100006364	EU176251	CLOSED	BC011403.1
MYO1F	4542	HsCD00075962	100011370	EU176554	FUSION	BC028071.1
MYO1F	4542	HsCD00043102	100003715	DQ891085	CLOSED	BC028071.1
GABRB3	2562	HsCD00075963	100011371	EU176555	FUSION	BC010641.1
GABRB3	2562	HsCD00043103	100003716	DQ891086	CLOSED	BC010641.1
NUP133	55746	HsCD00039954	100008728	DQ894268	FUSION	BC020107.1
DHX30	22907	HsCD00039955	100008729	DQ894269	FUSION	BC020126.1
MVK	4598	HsCD00039957	100008731	DQ894271	FUSION	BC016140.1
MVK	4598	HsCD00043106	100003719	DQ891089	CLOSED	BC016140.1
UCN2	90226	HsCD00039958	100008732	DQ894272	FUSION	BC022096.1
UCN2	90226	HsCD00043107	100003720	DQ891090	CLOSED	BC022096.1
NDUFB4	4710	HsCD00039959	100008733	DQ894273	FUSION	BC070285
DNAJA1	3301	HsCD00075966	100011373	EU176556	FUSION	BC008182.1
DNAJA1	3301	HsCD00043108	100003721	DQ891091	CLOSED	BC008182.1
TYROBP	7305	HsCD00039960	100008734	DQ894274	FUSION	BC011175.1
ACAD8	27034	HsCD00043110	100003723	DQ891093	CLOSED	BC001964.1
IFITM1	8519	HsCD00039962	100008736	DQ894276	FUSION	BC000897.1
IFITM1	8519	HsCD00043111	100003724	DQ891094	CLOSED	BC000897.1
MKRN2	23609	HsCD00039963	100008737	DQ894277	FUSION	BC015715.1
MKRN2	23609	HsCD00043112	100003725	DQ891095	CLOSED	BC015715.1
NDUFB4	4710	HsCD00039964	100008738	DQ894278	FUSION	BC000855.1
NDUFB4	4710	HsCD00043113	100003726	DQ891096	CLOSED	BC000855.1
NFIB	4781	HsCD00039965	100008739	DQ894279	FUSION	BC001283.1
NFIB	4781	HsCD00043114	100003727	DQ891097	CLOSED	BC001283.1
IFITM3	10410	HsCD00039966	100008740	DQ894280	FUSION	BC006794.1
IFITM3	10410	HsCD00043115	100003728	DQ891098	CLOSED	BC006794.1
TFAP2A	7020	HsCD00039967	100008741	DQ894281	FUSION	BC017754.1
TFAP2A	7020	HsCD00043116	100003729	DQ891099	CLOSED	BC017754.1
KRT17	3872	HsCD00039969	100008743	DQ894283	FUSION	BC000159.2
KRT17	3872	HsCD00043118	100003731	DQ891101	CLOSED	BC000159.2
TOMM20	9804	HsCD00075967	100011374	EU176557	FUSION	BC000882.1
TOMM20	9804	HsCD00043119	100003732	DQ891102	CLOSED	BC000882.1
EEF1G	1937	HsCD00039970	100008744	DQ894284	FUSION	BC015813.1
EEF1G	1937	HsCD00043120	100003733	DQ891103	CLOSED	BC015813.1
MCFD2	90411	HsCD00039971	100008745	DQ894285	FUSION	BC040357.2
MCFD2	90411	HsCD00043121	100003734	DQ891104	CLOSED	BC040357.2
HIST1H2AG	8969	HsCD00039972	100008746	DQ894286	FUSION	NM_021064
NFIL3	4783	HsCD00043122	100003735	DQ891105	CLOSED	BC008197.1
GYG2	8908	HsCD00039973	100008747	DQ894287	FUSION	BC023152.1
GYG2	8908	HsCD00043123	100003736	DQ891106	CLOSED	BC023152.1
RPS13	6207	HsCD00039974	100008748	DQ894288	FUSION	BC006772.1
RPS13	6207	HsCD00043124	100003737	DQ891107	CLOSED	BC006772.1
PPARG	5468	HsCD00039975	100008749	DQ894289	FUSION	BC006811.1
PPARG	5468	HsCD00043125	100003738	DQ891108	CLOSED	BC006811.1
BCL2A1	597	HsCD00039976	100008750	DQ894290	FUSION	BC016281.1
BCL2A1	597	HsCD00043126	100003739	DQ891109	CLOSED	BC016281.1
PAIP1	10605	HsCD00075968	100011375	EU176558	FUSION	BC015937.1
PAIP1	10605	HsCD00043127	100003740	DQ891110	CLOSED	BC015937.1
NIP7	51388	HsCD00039977	100008751	DQ894291	FUSION	BC015941.1
NIP7	51388	HsCD00043128	100003741	DQ891111	CLOSED	BC015941.1
KCNS3	3790	HsCD00039978	100008752	DQ894292	FUSION	BC015947.1
KCNS3	3790	HsCD00043129	100003742	DQ891112	CLOSED	BC015947.1
FTH1	2495	HsCD00039979	100008753	DQ894293	FUSION	BC000857.1
FTH1	2495	HsCD00043130	100003743	DQ891113	CLOSED	BC000857.1
PEPD	5184	HsCD00039980	100008754	DQ894294	FUSION	BC015027.1
PEPD	5184	HsCD00043131	100003744	DQ891114	CLOSED	BC015027.1
KCNS3	3790	HsCD00043132	100003745	DQ891115	CLOSED	BC015947
UGDH	7358	HsCD00039981	100008755	DQ894295	FUSION	BC022781.1
UGDH	7358	HsCD00043133	100003746	DQ891116	CLOSED	BC022781.1
ARHGDIA	396	HsCD00039982	100008756	DQ894296	FUSION	BC016031.1
ARHGDIA	396	HsCD00043134	100003747	DQ891117	CLOSED	BC016031.1
LTA	4049	HsCD00039984	100008758	DQ894298	FUSION	BC034729.1
LTA	4049	HsCD00043136	100003749	DQ891119	CLOSED	BC034729.1
SLC2A3	6515	HsCD00039985	100008759	DQ894299	FUSION	NM_006931
SF3A3	10946	HsCD00075969	100011376	EU176559	FUSION	BC011523.1
SF3A3	10946	HsCD00043137	100003750	DQ891120	CLOSED	BC011523.1
TPD52L2	7165	HsCD00039986	100008760	DQ894300	FUSION	BC006804.1
TPD52L2	7165	HsCD00043138	100003751	DQ891121	CLOSED	BC006804.1
SNTA1	6640	HsCD00042502	100011276	DQ896816	FUSION	BC026215.2
SNTA1	6640	HsCD00045583	100006196	DQ893566	CLOSED	BC026215.2
TIMP1	7076	HsCD00039987	100008761	DQ894301	FUSION	BC000866.1
TIMP1	7076	HsCD00043139	100003752	DQ891122	CLOSED	BC000866.1
UBXD2	23190	HsCD00039988	100008762	DQ894302	FUSION	BC035594.2
UBXD2	23190	HsCD00043140	100003753	DQ891123	CLOSED	BC035594.2
RHOD	29984	HsCD00039989	100008763	DQ894303	FUSION	BC001338.1
RHOD	29984	HsCD00043141	100003754	DQ891124	CLOSED	BC001338.1
RAB38	23682	HsCD00039991	100008765	DQ894305	FUSION	BC015808.1
RAB38	23682	HsCD00043143	100003756	DQ891126	CLOSED	BC015808.1
SLC1A4	6509	HsCD00039992	100008766	DQ894306	FUSION	BC026216.1
SLC1A4	6509	HsCD00043144	100003757	DQ891127	CLOSED	BC026216.1
MOSPD1	56180	HsCD00039993	100008767	DQ894307	FUSION	BC005700.1
MOSPD1	56180	HsCD00043145	100003758	DQ891128	CLOSED	BC005700.1
EIF3D	8664	HsCD00039994	100008768	DQ894308	FUSION	BC014912.1
EIF3D	8664	HsCD00043146	100003759	DQ891129	CLOSED	BC014912.1
RPL10A	4736	HsCD00039995	100008769	DQ894309	FUSION	BC006791.1
RPL10A	4736	HsCD00043147	100003760	DQ891130	CLOSED	BC006791.1
ERF	2077	HsCD00042503	100011277	DQ896817	FUSION	BC022231.1
ERF	2077	HsCD00045585	100006198	DQ893568	CLOSED	BC022231.1
CREG1	8804	HsCD00039996	100008770	DQ894310	FUSION	BC006786.1
CREG1	8804	HsCD00043148	100003761	DQ891131	CLOSED	BC006786.1
LZTR1	8216	HsCD00075970	100011377	EU176560	FUSION	BC026214.1
LZTR1	8216	HsCD00075971	100006366	EU176252	CLOSED	BC026214.1
FKBP3	2287	HsCD00039997	100008771	DQ894311	FUSION	BC016288.1
FKBP3	2287	HsCD00043149	100003762	DQ891132	CLOSED	BC016288.1
VPS33A	65082	HsCD00075972	100006367	EU176253	CLOSED	BC016617.1
ZFAND3	60685	HsCD00039998	100008772	DQ894312	FUSION	BC031481.2
ZFAND3	60685	HsCD00043150	100003763	DQ891133	CLOSED	BC031481.2
NR4A1	3164	HsCD00039999	100008773	DQ894313	FUSION	BC016147.1
NR4A1	3164	HsCD00043151	100003764	DQ891134	CLOSED	BC016147.1
C18orf55	29090	HsCD00040000	100008774	DQ894314	FUSION	BC000892.1
C18orf55	29090	HsCD00043152	100003765	DQ891135	CLOSED	BC000892.1
SSX2IP	117178	HsCD00040001	100008775	DQ894315	FUSION	BC033637.1
SSX2IP	117178	HsCD00043153	100003766	DQ891136	CLOSED	BC033637.1
ELF5	2001	HsCD00040002	100008776	DQ894316	FUSION	BC029743.1
ELF5	2001	HsCD00043154	100003767	DQ891137	CLOSED	BC029743.1
KLC2	64837	HsCD00040003	100008777	DQ894317	FUSION	BC034373.1
KLC2	64837	HsCD00043155	100003768	DQ891138	CLOSED	BC034373.1
MRPL10	124995	HsCD00040004	100008778	DQ894318	FUSION	BC015904.1
MRPL10	124995	HsCD00043156	100003769	DQ891139	CLOSED	BC015904.1
NXF2	56001	HsCD00040005	100008779	DQ894319	FUSION	BC015020.1
NXF2	56001	HsCD00043157	100003770	DQ891140	CLOSED	BC015020.1
HLA-DMB	3109	HsCD00040006	100008780	DQ894320	FUSION	BC027175.1
HLA-DMB	3109	HsCD00043158	100003771	DQ891141	CLOSED	BC027175.1
PEX5	5830	HsCD00040007	100008781	DQ894321	FUSION	BC010621.1
PEX5	5830	HsCD00043159	100003772	DQ891142	CLOSED	BC010621.1
RPS3A	6189	HsCD00040008	100008782	DQ894322	FUSION	BC017123.1
RPS3A	6189	HsCD00043160	100003773	DQ891143	CLOSED	BC017123.1
ARMCX2	9823	HsCD00040009	100008783	DQ894323	FUSION	BC015926.1
ARMCX2	9823	HsCD00045584	100006197	DQ893567	CLOSED	BC015926.1
RAD1	5810	HsCD00040010	100008784	DQ894324	FUSION	BC006837.1
RAD1	5810	HsCD00043161	100003774	DQ891144	CLOSED	BC006837.1
HSPA8	3312	HsCD00040011	100008785	DQ894325	FUSION	BC016179.1
HSPA8	3312	HsCD00043162	100003775	DQ891145	CLOSED	BC016179.1
RPSA	3921	HsCD00040012	100008786	DQ894326	FUSION	BC013827.1
RPSA	3921	HsCD00043163	100003776	DQ891146	CLOSED	BC013827.1
CRK	1398	HsCD00040013	100008787	DQ894327	FUSION	BC008506.1
CRK	1398	HsCD00043164	100003777	DQ891147	CLOSED	BC008506.1
ADRBK1	156	HsCD00040014	100008788	DQ894328	FUSION	BC037963.1
ADRBK1	156	HsCD00043165	100003778	DQ891148	CLOSED	BC037963.1
MAGEA1	4100	HsCD00040015	100008789	DQ894329	FUSION	BC017555.1
MAGEA1	4100	HsCD00043166	100003779	DQ891149	CLOSED	BC017555.1
NCDN	23154	HsCD00040016	100008790	DQ894330	FUSION	BC024592.1
NCDN	23154	HsCD00043167	100003780	DQ891150	CLOSED	BC024592.1
TOMM34	10953	HsCD00075973	100011378	EU176561	FUSION	BC014907.1
TOMM34	10953	HsCD00043168	100003781	DQ891151	CLOSED	BC014907.1
MLH1	4292	HsCD00075974	100011379	EU176562	FUSION	BC006850.1
MLH1	4292	HsCD00075975	100006368	EU176254	CLOSED	BC006850.1
SLC25A11	8402	HsCD00040017	100008791	DQ894331	FUSION	BC016294.1
SLC25A11	8402	HsCD00043169	100003782	DQ891152	CLOSED	BC016294.1
SEC23B	10483	HsCD00040018	100008792	DQ894332	FUSION	BC005404.1
SEC23B	10483	HsCD00043170	100003783	DQ891153	CLOSED	BC005404.1
DNAJB4	11080	HsCD00040019	100008793	DQ894333	FUSION	BC034721.1
DNAJB4	11080	HsCD00043171	100003784	DQ891154	CLOSED	BC034721.1
PTPRA	5786	HsCD00040020	100008794	DQ894334	FUSION	BC027308.1
PTPRA	5786	HsCD00043172	100003785	DQ891155	CLOSED	BC027308.1
ST3GAL1	6482	HsCD00040021	100008795	DQ894335	FUSION	BC018357.1
ST3GAL1	6482	HsCD00043173	100003786	DQ891156	CLOSED	BC018357.1
CREB1	1385	HsCD00040022	100008796	DQ894336	FUSION	BC010636.1
CREB1	1385	HsCD00043174	100003787	DQ891157	CLOSED	BC010636.1
MATR3	9782	HsCD00040023	100008797	DQ894337	FUSION	BC015031.1
MATR3	9782	HsCD00075976	100006369	EU176255	CLOSED	BC015031.1
ANXA1	301	HsCD00040024	100008798	DQ894338	FUSION	BC001275.1
ANXA1	301	HsCD00043190	100003803	DQ891173	CLOSED	BC001275.1
WWP2	11060	HsCD00040042	100008816	DQ894356	FUSION	BC013645.1
WWP2	11060	HsCD00043191	100003804	DQ891174	CLOSED	BC013645.1
ABHD5	51099	HsCD00040043	100008817	DQ894357	FUSION	BC021958.1
ABHD5	51099	HsCD00043192	100003805	DQ891175	CLOSED	BC021958.1
SMTN	6525	HsCD00043193	100003806	DQ891176	CLOSED	BC034237.2
MOAP1	64112	HsCD00040045	100008819	DQ894359	FUSION	BC015044.1
MOAP1	64112	HsCD00043194	100003807	DQ891177	CLOSED	BC015044.1
HPS3	84343	HsCD00040046	100008820	DQ894360	FUSION	BC040359.1
HPS3	84343	HsCD00043195	100003808	DQ891178	CLOSED	BC040359.1
NOV	4856	HsCD00040047	100008821	DQ894361	FUSION	BC015028.1
NOV	4856	HsCD00043196	100003809	DQ891179	CLOSED	BC015028.1
NRIP1	8204	HsCD00040048	100008822	DQ894362	FUSION	BC040361.1
NRIP1	8204	HsCD00043197	100003810	DQ891180	CLOSED	BC040361.1
CXADR	1525	HsCD00040049	100008823	DQ894363	FUSION	BC003684.1
CXADR	1525	HsCD00043198	100003811	DQ891181	CLOSED	BC003684.1
SMARCC2	6601	HsCD00075977	100006370	EU176256	CLOSED	BC026222.2
CDK9	1025	HsCD00040050	100008824	DQ894364	FUSION	BC001968.1
CDK9	1025	HsCD00043199	100003812	DQ891182	CLOSED	BC001968.1
CDK9	1025	HsCD00040051	100008825	DQ894365	FUSION	NM_001261
PITPNM1	9600	HsCD00075978	100011380	EU176563	FUSION	BC022230.1
PITPNM1	9600	HsCD00043200	100003813	DQ891183	CLOSED	BC022230.1
RAB3IL1	5866	HsCD00040052	100008826	DQ894366	FUSION	BC022239.1
RAB3IL1	5866	HsCD00043201	100003814	DQ891184	CLOSED	BC022239.1
MINK1	50488	HsCD00040025	100008799	DQ894339	FUSION	BC034673.1
MINK1	50488	HsCD00043175	100003788	DQ891158	CLOSED	BC034673.1
POLR2K	5440	HsCD00040026	100008800	DQ894340	FUSION	BC000806.1
POLR2K	5440	HsCD00043176	100003789	DQ891159	CLOSED	BC000806.1
ZNF461	92283	HsCD00040053	100008827	DQ894367	FUSION	BC028631.1
ZNF461	92283	HsCD00043202	100003815	DQ891185	CLOSED	BC028631.1
C15orf48	84419	HsCD00040054	100008828	DQ894368	FUSION	BC021173.1
PDIA6	10130	HsCD00040055	100008829	DQ894369	FUSION	BC001312.1
PDIA6	10130	HsCD00043203	100003816	DQ891186	CLOSED	BC001312.1
HIST1H2AM	8336	HsCD00040056	100008830	DQ894370	FUSION	BC032756.1
HIST1H2AM	8336	HsCD00043204	100003817	DQ891187	CLOSED	BC032756.1
HTRA3	94031	HsCD00040057	100008831	DQ894371	FUSION	BC035717.1
HTRA3	94031	HsCD00043205	100003818	DQ891188	CLOSED	BC035717.1
ATOH7	220202	HsCD00040058	100008832	DQ894372	FUSION	BC032621.1
ATOH7	220202	HsCD00043206	100003819	DQ891189	CLOSED	BC032621.1
ZMPSTE24	10269	HsCD00075979	100011381	EU176564	FUSION	BC037283.1
ZMPSTE24	10269	HsCD00075980	100006371	EU176257	CLOSED	BC037283.1
TCEAL1	9338	HsCD00040059	100008833	DQ894373	FUSION	BC000809.1
TCEAL1	9338	HsCD00075981	100006372	EU176258	CLOSED	BC000809.1
SCHIP1	29970	HsCD00040060	100008834	DQ894374	FUSION	BC036535.1
SCHIP1	29970	HsCD00043207	100003820	DQ891190	CLOSED	BC036535.1
DUT	1854	HsCD00040061	100008835	DQ894375	FUSION	BC033645.1
DUT	1854	HsCD00043208	100003821	DQ891191	CLOSED	BC033645.1
NAB1	4664	HsCD00075982	100011382	EU176565	FUSION	BC035724.1
NAB1	4664	HsCD00043209	100003822	DQ891192	CLOSED	BC035724.1
ARL5A	26225	HsCD00040062	100008836	DQ894376	FUSION	BC001254.1
ARL5A	26225	HsCD00043210	100003823	DQ891193	CLOSED	BC001254.1
C15orf48	84419	HsCD00043211	100003824	DQ891194	CLOSED	BC021173
HAGH	3029	HsCD00076502	100006621	EU176259	CLOSED	BC000840.1
CDC42	998	HsCD00040063	100008837	DQ894377	FUSION	BC003682.1
CDC42	998	HsCD00043212	100003825	DQ891195	CLOSED	BC003682.1
FUT11	170384	HsCD00040064	100008838	DQ894378	FUSION	BC036037.1
FUT11	170384	HsCD00075983	100006373	EU176260	CLOSED	BC036037.1
CIB1	10519	HsCD00040065	100008839	DQ894379	FUSION	BC000846.1
CIB1	10519	HsCD00043213	100003826	DQ891196	CLOSED	BC000846.1
RAD18	56852	HsCD00040066	100008840	DQ894380	FUSION	BC001302.1
RAD18	56852	HsCD00043214	100003827	DQ891197	CLOSED	BC001302.1
AP3S1	1176	HsCD00040067	100008841	DQ894381	FUSION	BC000804.1
AP3S1	1176	HsCD00043215	100003828	DQ891198	CLOSED	BC000804.1
RBMY1F	159163	HsCD00040068	100008842	DQ894382	FUSION	BC030018.1
RBMY1F	159163	HsCD00043216	100003829	DQ891199	CLOSED	BC030018.1
RPS9	6203	HsCD00040069	100008843	DQ894383	FUSION	BC000802.1
RPS9	6203	HsCD00043217	100003830	DQ891200	CLOSED	BC000802.1
TRIM22	10346	HsCD00040070	100008844	DQ894384	FUSION	BC035582.1
TRIM22	10346	HsCD00043218	100003831	DQ891201	CLOSED	BC035582.1
MOBKL2B	79817	HsCD00040071	100008845	DQ894385	FUSION	BC033027.1
MOBKL2B	79817	HsCD00043219	100003832	DQ891202	CLOSED	BC033027.1
SERPIND1	3053	HsCD00040072	100008846	DQ894386	FUSION	BC035028.1
SERPIND1	3053	HsCD00043220	100003833	DQ891203	CLOSED	BC035028.1
RGS19	10287	HsCD00040073	100008847	DQ894387	FUSION	BC001318.1
RGS19	10287	HsCD00043221	100003834	DQ891204	CLOSED	BC001318.1
RBBP5	5929	HsCD00040074	100008848	DQ894388	FUSION	BC037284.1
RBBP5	5929	HsCD00043222	100003835	DQ891205	CLOSED	BC037284.1
DUSP19	142679	HsCD00040075	100008849	DQ894389	FUSION	BC035000.1
KDELC1	79070	HsCD00043224	100003837	DQ891207	CLOSED	BC001297.1
LHFPL5	222662	HsCD00040077	100008851	DQ894391	FUSION	BC028630.1
LHFPL5	222662	HsCD00043225	100003838	DQ891208	CLOSED	BC028630.1
TRAF6	7189	HsCD00040078	100008852	DQ894392	FUSION	BC031052.1
TRAF6	7189	HsCD00043226	100003839	DQ891209	CLOSED	BC031052.1
SFRS2	6427	HsCD00040079	100008853	DQ894393	FUSION	BC001303.1
SFRS2	6427	HsCD00043227	100003840	DQ891210	CLOSED	BC001303.1
TPTE	7179	HsCD00040080	100008854	DQ894394	FUSION	BC028719.1
TPTE	7179	HsCD00043228	100003841	DQ891211	CLOSED	BC028719.1
C2orf49	79074	HsCD00040081	100008855	DQ894395	FUSION	BC001310.1
C2orf49	79074	HsCD00043229	100003842	DQ891212	CLOSED	BC001310.1
SOCS5	9655	HsCD00040082	100008856	DQ894396	FUSION	BC032862.1
SOCS5	9655	HsCD00043230	100003843	DQ891213	CLOSED	BC032862.1
FAM76B	143684	HsCD00040083	100008857	DQ894397	FUSION	BC026013.1
FAM76B	143684	HsCD00043231	100003844	DQ891214	CLOSED	BC026013.1
DDX56	54606	HsCD00040084	100008858	DQ894398	FUSION	BC001235.1
DDX56	54606	HsCD00043232	100003845	DQ891215	CLOSED	BC001235.1
PSMB6	5694	HsCD00040085	100008859	DQ894399	FUSION	BC000835.1
PSMB6	5694	HsCD00043233	100003846	DQ891216	CLOSED	BC000835.1
SYTL1	84958	HsCD00040086	100008860	DQ894400	FUSION	BC035725.1
SYTL1	84958	HsCD00043234	100003847	DQ891217	CLOSED	BC035725.1
NUCKS1	64710	HsCD00040087	100008861	DQ894401	FUSION	BC000805.1
NUCKS1	64710	HsCD00043235	100003848	DQ891218	CLOSED	BC000805.1
HAS1	3036	HsCD00040088	100008862	DQ894402	FUSION	BC035837.1
HAS1	3036	HsCD00043236	100003849	DQ891219	CLOSED	BC035837.1
HAGH	3029	HsCD00040089	100008863	DQ894403	FUSION	BC000840.1
OGN	4969	HsCD00040098	100008872	DQ894412	FUSION	BC037273.1
OGN	4969	HsCD00043244	100003857	DQ891227	CLOSED	BC037273.1
PEX12	5193	HsCD00039808	100008582	DQ894122	FUSION	BC031085.1
F2RL1	2150	HsCD00042983	100003596	DQ890966	CLOSED	BC018130.1
C19orf41	126123	HsCD00039826	100008600	DQ894140	FUSION	BC029535.1
DIS3L2	129563	HsCD00075949	100006359	EU176261	CLOSED	BC036113.1
TMCO6	55374	HsCD00039849	100008623	DQ894163	FUSION	BC009618.1
C16orf73	254528	HsCD00040169	100008943	DQ894483	FUSION	BC029829.1
C16orf73	254528	HsCD00043316	100003929	DQ891299	CLOSED	BC029829.1
TREM2	54209	HsCD00043327	100003940	DQ891310	CLOSED	BC032362.1
CYP51A1	1595	HsCD00040181	100008955	DQ894495	FUSION	BC032322.1
HAGH	3029	HsCD00043237	100003850	DQ891220	CLOSED	BC000840.1
FAM13C1	220965	HsCD00040090	100008864	DQ894404	FUSION	BC036453.1
HAGH	3029	HsCD00043238	100003851	DQ891221	CLOSED	BC000840.1
FAM13C1	220965	HsCD00075984	100006374	EU176262	CLOSED	BC036453.1
SLC6A1	6529	HsCD00040091	100008865	DQ894405	FUSION	BC033904.1
SLC6A1	6529	HsCD00043239	100003852	DQ891222	CLOSED	BC033904.1
AQP5	362	HsCD00040092	100008866	DQ894406	FUSION	BC032946.1
AQP5	362	HsCD00043240	100003853	DQ891223	CLOSED	BC032946.1
GALNT6	11226	HsCD00040093	100008867	DQ894407	FUSION	BC035822.1
GALNT6	11226	HsCD00043241	100003854	DQ891224	CLOSED	BC035822.1
SET	6418	HsCD00040094	100008868	DQ894408	FUSION	BC032749.1
SET	6418	HsCD00075985	100006375	EU176263	CLOSED	BC032749.1
RACGAP1	29127	HsCD00040095	100008869	DQ894409	FUSION	BC032754.1
RACGAP1	29127	HsCD00075986	100006376	EU176264	CLOSED	BC032754.1
DPPA4	55211	HsCD00040096	100008870	DQ894410	FUSION	BC032846.1
DPPA4	55211	HsCD00043242	100003855	DQ891225	CLOSED	BC032846.1
PAPOLB	56903	HsCD00040097	100008871	DQ894411	FUSION	BC036653.1
PAPOLB	56903	HsCD00043243	100003856	DQ891226	CLOSED	BC036653.1
GGN	199720	HsCD00040099	100008873	DQ894413	FUSION	BC035008.1
GGN	199720	HsCD00043245	100003858	DQ891228	CLOSED	BC035008.1
ELOVL4	6785	HsCD00043246	100003859	DQ891229	CLOSED	BC038506.1
TNK1	8711	HsCD00040100	100008874	DQ894414	FUSION	BC035782.1
TNK1	8711	HsCD00043247	100003860	DQ891230	CLOSED	BC035782.1
CSNK1A1L	122011	HsCD00040101	100008875	DQ894415	FUSION	BC028723.1
CSNK1A1L	122011	HsCD00043248	100003861	DQ891231	CLOSED	BC028723.1
GALC	2581	HsCD00040102	100008876	DQ894416	FUSION	BC036518.1
GALC	2581	HsCD00043249	100003862	DQ891232	CLOSED	BC036518.1
WDR68	10238	HsCD00040103	100008877	DQ894417	FUSION	BC001264.1
WDR68	10238	HsCD00043250	100003863	DQ891233	CLOSED	BC001264.1
LSS	4047	HsCD00040104	100008878	DQ894418	FUSION	BC035638.1
LSS	4047	HsCD00043251	100003864	DQ891234	CLOSED	BC035638.1
FFAR3	2865	HsCD00040105	100008879	DQ894419	FUSION	BC035657.1
FFAR3	2865	HsCD00043252	100003865	DQ891235	CLOSED	BC035657.1
JPH3	57338	HsCD00040106	100008880	DQ894420	FUSION	BC036533.1
JPH3	57338	HsCD00045586	100006199	DQ893569	CLOSED	BC036533.1
MAGEB4	4115	HsCD00040107	100008881	DQ894421	FUSION	BC032852.1
MAGEB4	4115	HsCD00043253	100003866	DQ891236	CLOSED	BC032852.1
PRDM4	11108	HsCD00040108	100008882	DQ894422	FUSION	BC035581.1
PRDM4	11108	HsCD00043254	100003867	DQ891237	CLOSED	BC035581.1
PLEK2	26499	HsCD00040109	100008883	DQ894423	FUSION	BC001226.1
PLEK2	26499	HsCD00043255	100003868	DQ891238	CLOSED	BC001226.1
NLGN1	22871	HsCD00075987	100011383	EU176566	FUSION	BC032555.1
NLGN1	22871	HsCD00043256	100003869	DQ891239	CLOSED	BC032555.1
HSPBP1	23640	HsCD00040110	100008884	DQ894424	FUSION	BC001236.1
HSPBP1	23640	HsCD00045587	100006200	DQ893570	CLOSED	BC001236.1
PIWIL4	143689	HsCD00040111	100008885	DQ894425	FUSION	BC031060.1
PIWIL4	143689	HsCD00043257	100003870	DQ891240	CLOSED	BC031060.1
CXCR7	57007	HsCD00040112	100008886	DQ894426	FUSION	BC036661.1
[truncated: 4,964 more rows]
